# Supplementary material
Source: MDPI journal article supplement (https://www.mdpi.com/2072-4292/16/6/1053)
Supplement: s1 [file s1]

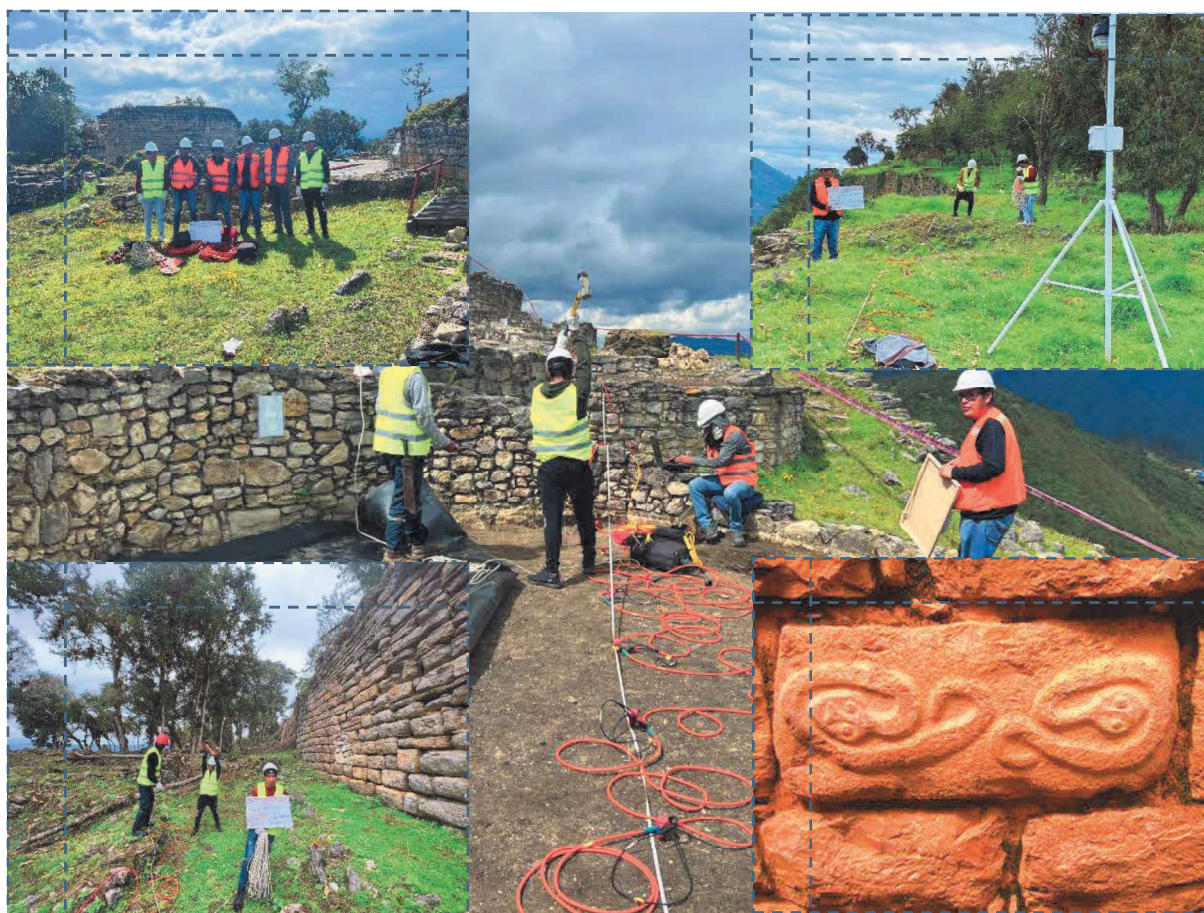

---

## **CONTRATACIÓN DE SERVICIO PARA LA DETERMINACION DE LA ESTRATIGRAFÍA DEL ÁREA NUCLEAR DE LA ZONA ARQUEOLÓGICA MONUMENTAL DE KUÉLAP**

---

**NÚMERO DE CONTRATO: N° 030-2023-OGA-SG/MC**

**CONSULTOR: Ing. Nilsson Mori Sánchez**

**COLEGIATURA: CIP 175217**

**ENTREGABLE: SEGUNDO ENTREGABLE**

**FECHA: 21/07/2023**

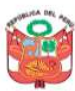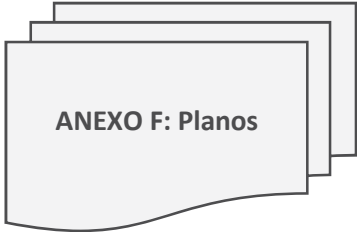

ANEXO F: Planos



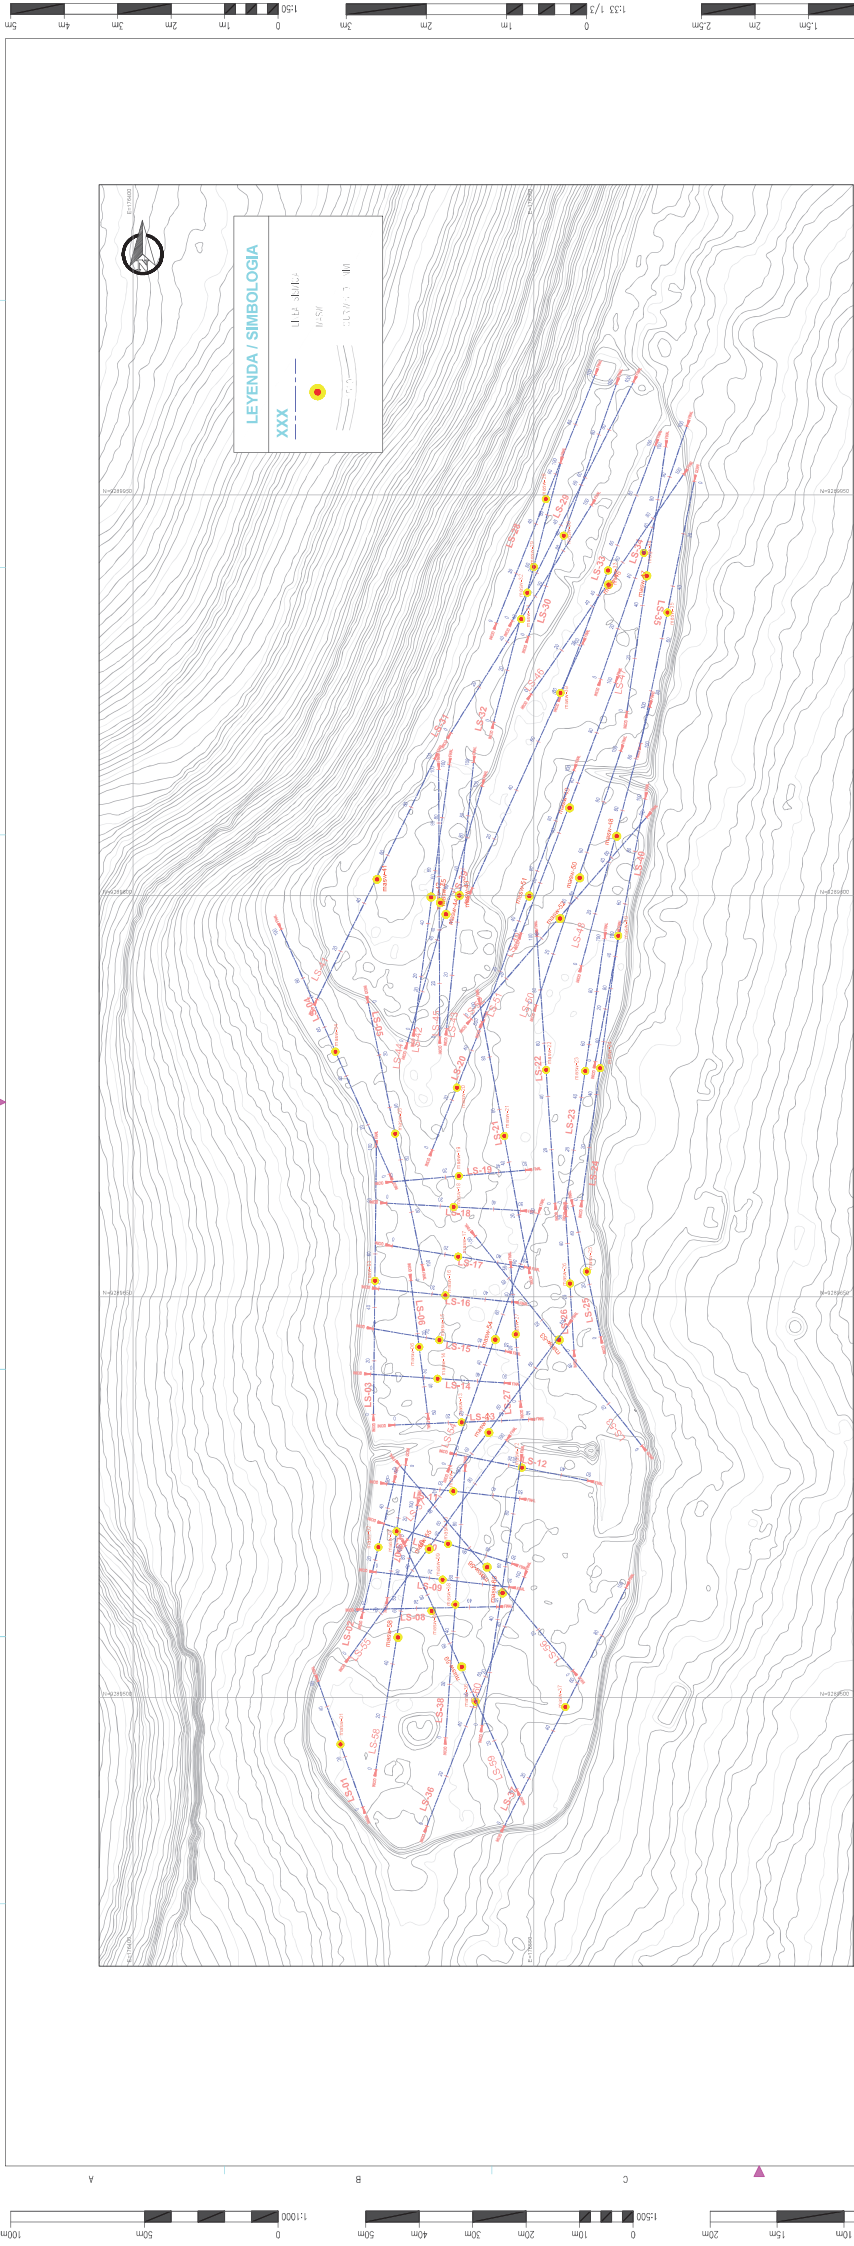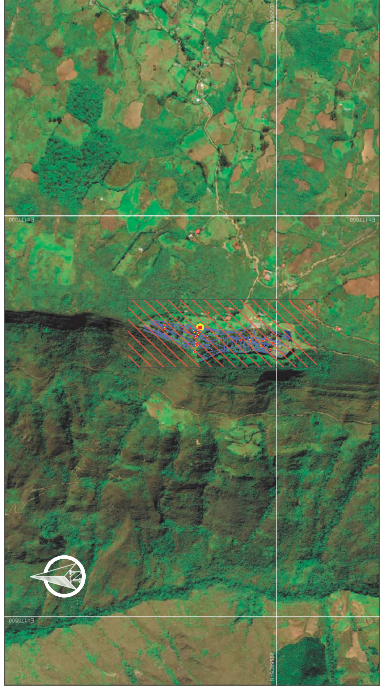

PLANO DE LOCALIZACIÓN DEL PROYECTO

| CONFIDENCIAL                                                                                                                                                                                                                                                                                                                                     |                                                                                                                                                                                                                                          | DOCUMENTOS DE REFERENCIA                |
|--------------------------------------------------------------------------------------------------------------------------------------------------------------------------------------------------------------------------------------------------------------------------------------------------------------------------------------------------|------------------------------------------------------------------------------------------------------------------------------------------------------------------------------------------------------------------------------------------|-----------------------------------------|
| ESTE PLANO Y LA INFORMACIÓN QUE CONTIENE SON PROPRIEDAD DE LA COMPAÑÍA Y SE ENTREGAN AL CLIENTE, SIN SER SIN PREVENIR AUTORIZACIÓN EXPRESA, PROHIBIENDO SU REPRODUCCIÓN O DISTRIBUCIÓN A TERCEROS SIN LOS AUTOS CONVENIOS EN ESTE PLANO. SERÁ RESPONSABILIDAD DEL CLIENTE GARANTIZAR LA INTEGRIDAD, RESPONSABILIDAD LEGAL POR PARTE DEL CLIENTE. | <p>NOTAS:</p> <ol style="list-style-type: none"> <li>1. LA INFORMACIÓN TOPOGRAFICA ESTA EN EL SISTEMA</li> <li>2. LA UNIDAD PARA LAS DIMENSIONES ES EN METROS Y</li> <li>3. LAS ESCALAS MUESTRAN ES PARA EL TITULAR Y CONTROL</li> </ol> | <p>REV:</p> <p>A</p> <p>DESCRIPCIÓN</p> |

[illegible]

CLIENTE:


**Ministerio de Cultura**  
 DIRECCIÓN NACIONAL DE  
 CULTURA ORAL  
 DIRECCIÓN NACIONAL DE  
 CULTURA MATERIAL

CONSULTOR:  
Ing. Nilsson Mori Sánchez  
CIP 175217

PROYECTO:

ACCIÓN DE SERVICIO PARA LA DETERMINACIÓN DE LA ESTRATIGRAFÍA DEL ÁREA  
NUCLEAR DE LA ZONA ARQUEOLÓGICA MONUMENTAL DE KUÉLAP  
NÚMERO DE CONTRATO: N° 030-2023-OGA-SG/MC

## PLANO DE UBICACIÓN DE ENSAYOS

| ESTUDIOS DE GEOFÍSICA |           |        |
|-----------------------|-----------|--------|
| INDICADA              | PLANO N°: | REV. A |

| Código | Inicio |         |         | Fin     |      |       | Longitud | Código | Inicio  |         |         | Fin   |     |       | Longitud |         |        |         |     |
|--------|--------|---------|---------|---------|------|-------|----------|--------|---------|---------|---------|-------|-----|-------|----------|---------|--------|---------|-----|
|        | Este   | Norte   | Este    | Norte   | Este | Norte |          |        | Este    | Norte   | Este    | Norte |     |       |          |         |        |         |     |
| LS-01  | 176488 | 9289459 | 176468  | 9289506 | 11   | 50    | LS-21    | 176548 | 9289661 | 1765283 | 9289754 | 34    | 100 | LS-41 | 176568   | 9289761 | 176514 | 9289851 | 100 |
| LS-02  | 176488 | 9289460 | 176467  | 9289503 | 63   | 50    | LS-22    | 176538 | 9289685 | 176517  | 9289781 | 95    | 100 | LS-42 | 176508   | 9289752 | 176518 | 9289841 | 100 |
| LS-03  | 176490 | 9289460 | 17649   | 928970  | 99   | 50    | LS-23    | 176562 | 9289688 | 176511  | 9289784 | 77    | 100 | LS-43 | 176505   | 9289756 | 176520 | 9289847 | 100 |
| LS-04  | 176498 | 9289606 | 176488  | 9289787 | 42   | 100   | LS-24    | 176568 | 9289686 | 176531  | 9289788 | 08    | 100 | LS-44 | 176504   | 9289748 | 176529 | 9289831 | 100 |
| LS-05  | 176488 | 9289760 | 176508  | 9289667 | 07   | 100   | LS-25    | 176575 | 9289835 | 176564  | 9289681 | 91    | 50  | LS-45 | 176516   | 9289754 | 176531 | 9289846 | 100 |
| LS-06  | 176504 | 9289760 | 176508  | 9289605 | 39   | 50    | LS-26    | 176565 | 9289830 | 176562  | 9289681 | 91    | 50  | LS-46 | 176532   | 9289878 | 176564 | 9289861 | 100 |
| LS-07  | 176502 | 9289567 | 176495  | 9289537 | 46   | 50    | LS-27    | 176545 | 9289811 | 176541  | 9289684 | 87    | 50  | LS-47 | 176586   | 9289869 | 176599 | 9289961 | 100 |
| LS-08  | 176488 | 9289533 | 176539  | 9289534 | 36   | 50    | LS-28    | 176536 | 9289902 | 176572  | 9289994 | 92    | 100 | LS-48 | 176567   | 9289751 | 176594 | 9289876 | 29  |
| LS-09  | 176491 | 9289547 | 176548  | 9289438 | 36   | 50    | LS-29    | 176542 | 9289903 | 176587  | 9289991 | 92    | 100 | LS-49 | 176570   | 9289757 | 176597 | 9289868 | 29  |
| LS-10  | 176494 | 9289565 | 176547  | 9289515 | 35   | 50    | LS-30    | 176548 | 9289897 | 176586  | 9289991 | 44    | 100 | LS-50 | 176554   | 9289769 | 176597 | 9289841 | 100 |
| LS-11  | 176495 | 9289580 | 176544  | 9289748 | 48   | 50    | LS-31    | 176510 | 9289861 | 176571  | 9289944 | 09    | 100 | LS-51 | 176531   | 9289756 | 176565 | 9289846 | 100 |
| LS-12  | 176521 | 9289591 | 176570  | 9289644 | 50   | 50    | LS-32    | 176530 | 9289865 | 176575  | 9289961 | 83    | 100 | LS-52 | 176533   | 9289760 | 176565 | 9289830 | 100 |
| LS-13  | 176498 | 9289602 | 176549  | 9289604 | 04   | 50    | LS-33    | 176504 | 9289875 | 176935  | 9289964 | 50    | 100 | LS-53 | 176535   | 9289859 | 176542 | 9289655 | 100 |
| LS-14  | 176488 | 9289621 | 176538  | 9289617 | 75   | 50    | LS-34    | 176575 | 9289881 | 176907  | 9289971 | 65    | 100 | LS-54 | 176519   | 9289866 | 176552 | 9289688 | 100 |
| LS-15  | 176490 | 9289638 | 176529  | 9289623 | 61   | 50    | LS-35    | 176610 | 9289955 | 176586  | 9289857 | 03    | 100 | LS-55 | 176483   | 9289519 | 176536 | 9289598 | 100 |
| LS-16  | 176497 | 9289653 | 176547  | 9289643 | 03   | 50    | LS-36    | 176510 | 9289842 | 176546  | 9289544 | 14    | 100 | LS-56 | 176564   | 9289512 | 176560 | 9289584 | 100 |
| LS-17  | 176497 | 9289669 | 176546  | 9289647 | 03   | 50    | LS-37    | 176539 | 9289845 | 176584  | 9289541 | 04    | 100 | LS-57 | 176564   | 9289640 | 176591 | 9289557 | 100 |
| LS-18  | 176495 | 9289685 | 176549  | 9289682 | 23   | 50    | LS-38    | 176517 | 9289848 | 176524  | 9289584 | 74    | 100 | LS-58 | 176493   | 9289477 | 176506 | 9289575 | 100 |
| LS-19  | 176497 | 9289693 | 176548  | 9289697 | 33   | 50    | LS-39    | 176527 | 9289803 | 176566  | 9289884 | 14    | 100 | LS-59 | 176548   | 9289497 | 176549 | 9289584 | 100 |
| LS-20  | 176511 | 9289706 | 1765340 | 9289751 | 49   | 50    | LS-40    | 176573 | 9289788 | 1765912 | 9289836 | 25    | 100 | LS-60 | 176531   | 9289490 | 176545 | 9289584 | 100 |











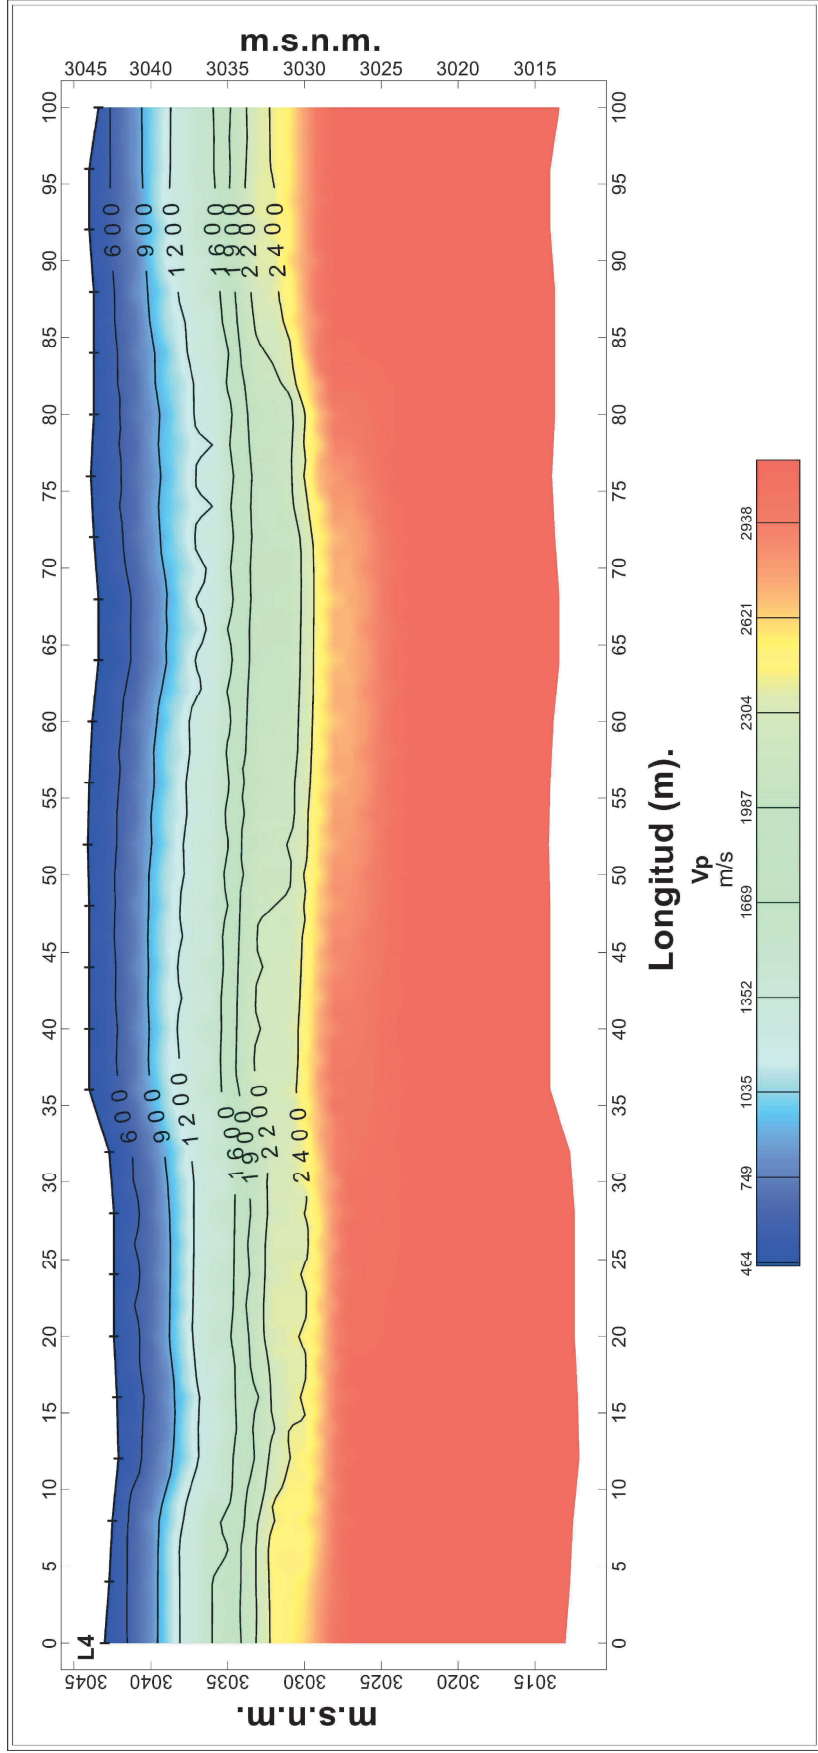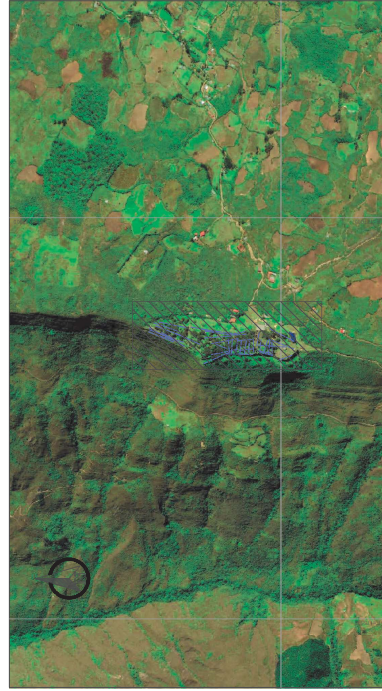

**PLANO DE LOCALIZACIÓN DEL PROYECTO**  
ESCALA: 1/10000

| Código | CUADRO DE COORDENADAS |         |          |        |         |          |      |       |          |         |        |       |          |         | Longitud | Latitud |         |          |    |
|--------|-----------------------|---------|----------|--------|---------|----------|------|-------|----------|---------|--------|-------|----------|---------|----------|---------|---------|----------|----|
|        | Inicio                |         |          | Código |         |          | Fin  |       |          | Código  | Inicio |       |          | Fin     |          |         |         |          |    |
|        | Este                  | Norte   | Longitud | Este   | Norte   | Longitud | Este | Norte | Longitud |         | Este   | Norte | Longitud | Este    |          |         | Norte   | Longitud |    |
| LS-01  | 1764868               | 9289459 | 10       | LS-21  | 1765438 | 9289861  | 10   | LS-41 | 1765488  | 9289761 | 10     | LS-61 | 1765488  | 9289761 | 10       | LS-81   | 1765488 | 9289881  | 10 |
| LS-02  | 1764868               | 9289530 | 11       | LS-22  | 1765538 | 9289876  | 11   | LS-42 | 1765588  | 9289776 | 11     | LS-62 | 1765588  | 9289776 | 11       | LS-82   | 1765588 | 9289891  | 11 |
| LS-03  | 1764900               | 9289606 | 10       | LS-23  | 1765628 | 9289886  | 10   | LS-43 | 1765718  | 9289786 | 10     | LS-63 | 1765718  | 9289786 | 10       | LS-83   | 1765718 | 9289901  | 10 |
| LS-04  | 1764900               | 9289646 | 10       | LS-24  | 1765668 | 9289886  | 10   | LS-44 | 1765758  | 9289786 | 10     | LS-64 | 1765758  | 9289786 | 10       | LS-84   | 1765758 | 9289901  | 10 |
| LS-05  | 1764880               | 9289760 | 10       | LS-25  | 1765758 | 9289886  | 10   | LS-45 | 1765848  | 9289786 | 10     | LS-65 | 1765848  | 9289786 | 10       | LS-85   | 1765848 | 9289901  | 10 |
| LS-06  | 1765040               | 9289636 | 30       | LS-26  | 1765858 | 9289893  | 30   | LS-46 | 1765948  | 9289786 | 30     | LS-66 | 1765948  | 9289786 | 30       | LS-86   | 1765948 | 9289901  | 30 |
| LS-07  | 1765020               | 9289587 | 46       | LS-27  | 1765948 | 9289893  | 46   | LS-47 | 1766038  | 9289786 | 46     | LS-67 | 1766038  | 9289786 | 46       | LS-87   | 1766038 | 9289901  | 46 |
| LS-08  | 1764880               | 9289533 | 10       | LS-28  | 1765938 | 9289893  | 10   | LS-48 | 1766028  | 9289786 | 10     | LS-68 | 1766028  | 9289786 | 10       | LS-88   | 1766028 | 9289901  | 10 |
| LS-09  | 1764910               | 9289547 | 10       | LS-29  | 1765948 | 9289893  | 10   | LS-49 | 1766038  | 9289786 | 10     | LS-69 | 1766038  | 9289786 | 10       | LS-89   | 1766038 | 9289901  | 10 |
| LS-10  | 1764900               | 9289565 | 10       | LS-30  | 1765948 | 9289893  | 10   | LS-50 | 1766038  | 9289786 | 10     | LS-70 | 1766038  | 9289786 | 10       | LS-90   | 1766038 | 9289901  | 10 |
| LS-11  | 1764900               | 9289565 | 10       | LS-31  | 1765948 | 9289893  | 10   | LS-51 | 1766038  | 9289786 | 10     | LS-71 | 1766038  | 9289786 | 10       | LS-91   | 1766038 | 9289901  | 10 |
| LS-12  | 1765210               | 9289591 | 10       | LS-32  | 1765938 | 9289893  | 10   | LS-52 | 1766038  | 9289786 | 10     | LS-72 | 1766038  | 9289786 | 10       | LS-92   | 1766038 | 9289901  | 10 |
| LS-13  | 1764900               | 9289602 | 10       | LS-33  | 1765948 | 9289893  | 10   | LS-53 | 1766038  | 9289786 | 10     | LS-73 | 1766038  | 9289786 | 10       | LS-93   | 1766038 | 9289901  | 10 |
| LS-14  | 1764880               | 9289621 | 10       | LS-34  | 1765948 | 9289893  | 10   | LS-54 | 1766038  | 9289786 | 10     | LS-74 | 1766038  | 9289786 | 10       | LS-94   | 1766038 | 9289901  | 10 |
| LS-15  | 1764910               | 9289636 | 30       | LS-35  | 1765948 | 9289893  | 30   | LS-55 | 1766038  | 9289786 | 30     | LS-75 | 1766038  | 9289786 | 30       | LS-95   | 1766038 | 9289901  | 30 |
| LS-16  | 1764920               | 9289653 | 10       | LS-36  | 1765948 | 9289893  | 10   | LS-56 | 1766038  | 9289786 | 10     | LS-76 | 1766038  | 9289786 | 10       | LS-96   | 1766038 | 9289901  | 10 |
| LS-17  | 1764910               | 9289669 | 10       | LS-37  | 1765938 | 9289893  | 10   | LS-57 | 1766038  | 9289786 | 10     | LS-77 | 1766038  | 9289786 | 10       | LS-97   | 1766038 | 9289901  | 10 |
| LS-18  | 1764900               | 9289685 | 10       | LS-38  | 1765948 | 9289893  | 10   | LS-58 | 1766038  | 9289786 | 10     | LS-78 | 1766038  | 9289786 | 10       | LS-98   | 1766038 | 9289901  | 10 |
| LS-19  | 1764910               | 9289693 | 10       | LS-39  | 1765948 | 9289893  | 10   | LS-59 | 1766038  | 9289786 | 10     | LS-79 | 1766038  | 9289786 | 10       | LS-99   | 1766038 | 9289901  | 10 |
| LS-20  | 1765120               | 9289705 | 10       | LS-40  | 1765948 | 9289893  | 10   | LS-60 | 1766038  | 9289786 | 10     | LS-80 | 1766038  | 9289786 | 10       | LS-100  | 1766038 | 9289901  | 10 |

[illegible]



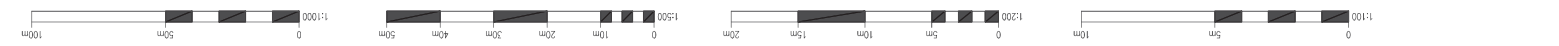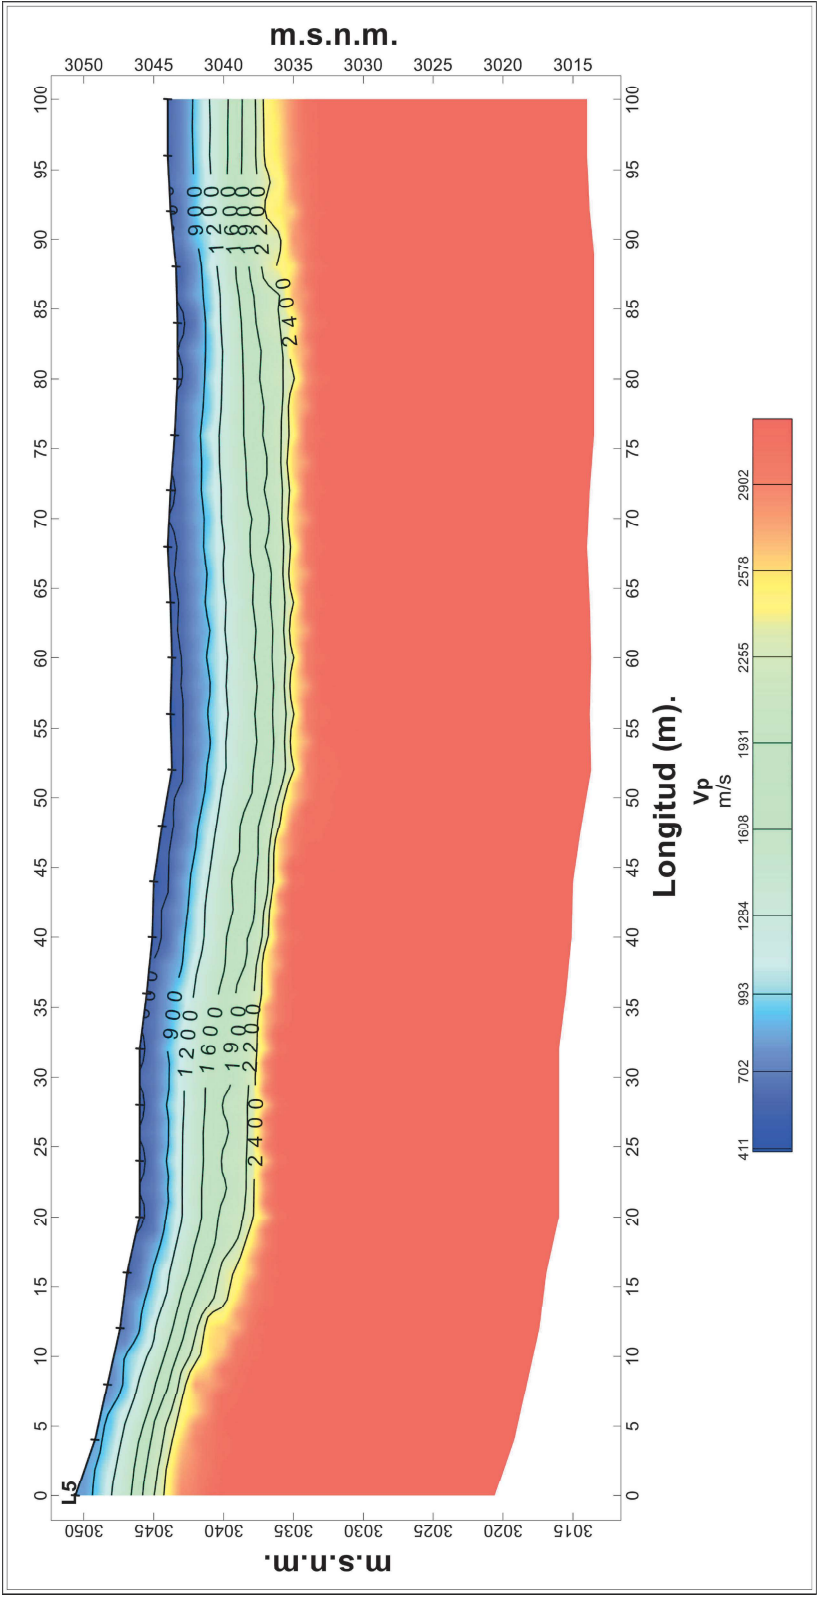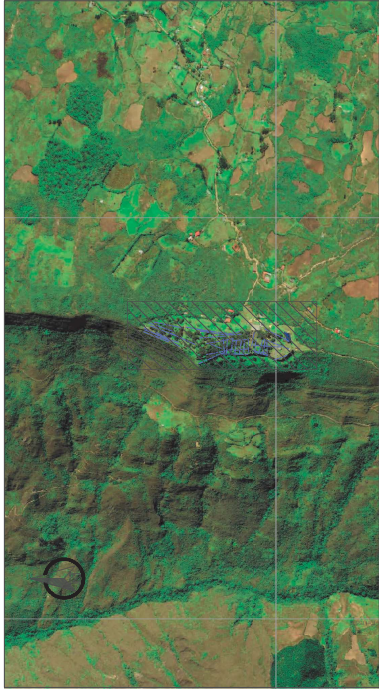

PLANO DE LOCALIZACIÓN DEL PROYECTO  
ESCALA 1/1000

| CUADRO DE COORDENADAS |           |            |           |            |          |        |           |            |           |            |          |        |           |            |           |            |          |
|-----------------------|-----------|------------|-----------|------------|----------|--------|-----------|------------|-----------|------------|----------|--------|-----------|------------|-----------|------------|----------|
| Código                | Inicio    | Este       | Norte     | Fin        | Longitud | Código | Inicio    | Este       | Norte     | Fin        | Longitud | Código | Inicio    | Este       | Norte     | Fin        | Longitud |
| LS-01                 | 176486.00 | 9289459.00 | 176469.25 | 9289506.11 | 50       | LS-21  | 176548.00 | 9289661.00 | 176529.83 | 9289759.34 | 100      | LS-41  | 176468.00 | 9289761.00 | 176531.00 | 9289851.00 | 100      |
| LS-02                 | 176486.00 | 9289532.00 | 176497.63 | 9289590.63 | 50       | LS-22  | 176558.00 | 9289685.00 | 176576.43 | 9289783.95 | 100      | LS-42  | 176505.00 | 9289756.00 | 176531.00 | 9289847.00 | 100      |
| LS-03                 | 176490.00 | 9289506.00 | 176491.08 | 9289705.99 | 100      | LS-23  | 176568.00 | 9289685.00 | 176551.15 | 9289784.77 | 100      | LS-43  | 176518.00 | 9289756.00 | 176527.00 | 9289847.00 | 100      |
| LS-04                 | 176496.00 | 9289596.00 | 176455.48 | 9289787.42 | 100      | LS-24  | 176568.00 | 9289686.00 | 176581.56 | 9289785.08 | 100      | LS-44  | 176504.00 | 9289749.00 | 176529.00 | 9289848.00 | 100      |
| LS-05                 | 176488.00 | 9289760.00 | 176508.23 | 9289662.07 | 100      | LS-25  | 176575.00 | 9289635.00 | 176584.60 | 9289683.91 | 50       | LS-45  | 176516.00 | 9289754.00 | 176531.00 | 9289848.00 | 100      |
| LS-06                 | 176504.00 | 9289556.00 | 176510.20 | 9289606.39 | 50       | LS-26  | 176585.00 | 9289630.00 | 176592.01 | 9289679.91 | 50       | LS-46  | 176552.00 | 9289829.00 | 176540.00 | 9289855.00 | 100      |
| LS-07                 | 176502.00 | 9289587.00 | 176495.24 | 9289637.46 | 50       | LS-27  | 176594.00 | 9289611.00 | 176541.44 | 9289660.87 | 50       | LS-47  | 176586.00 | 9289869.00 | 176594.00 | 9289867.00 | 100      |
| LS-08                 | 176486.00 | 9289531.00 | 176535.99 | 9289534.02 | 50       | LS-28  | 176636.00 | 9289502.00 | 176572.96 | 928994.92  | 100      | LS-48  | 176567.00 | 9289750.00 | 176594.46 | 9289870.90 | 100      |
| LS-09                 | 176491.00 | 9289547.00 | 176540.68 | 9289541.36 | 50       | LS-29  | 176642.00 | 9289503.00 | 176587.25 | 9289921.18 | 100      | LS-49  | 176550.00 | 9289769.00 | 176577.00 | 9289868.00 | 100      |
| LS-10                 | 176494.00 | 9289565.00 | 176541.74 | 9289550.15 | 50       | LS-30  | 176648.00 | 9289597.00 | 176580.89 | 9289991.44 | 100      | LS-50  | 176554.00 | 9289756.00 | 176575.00 | 9289862.00 | 100      |
| LS-11                 | 176495.00 | 9289580.00 | 176544.69 | 9289574.48 | 50       | LS-31  | 176655.00 | 9289661.00 | 176571.53 | 9289946.09 | 100      | LS-51  | 176531.00 | 9289756.00 | 176565.00 | 9289845.00 | 100      |
| LS-12                 | 176521.00 | 9289591.00 | 176570.03 | 9289581.19 | 50       | LS-32  | 176655.00 | 9289665.00 | 176559.99 | 9289961.83 | 100      | LS-52  | 176533.00 | 9289760.00 | 176565.00 | 9289840.00 | 100      |
| LS-13                 | 176498.00 | 9289502.00 | 176547.96 | 9289604.04 | 50       | LS-33  | 176666.00 | 9289875.00 | 176595.47 | 9289968.50 | 100      | LS-53  | 176585.00 | 9289597.00 | 176562.00 | 9289863.00 | 100      |
| LS-14                 | 176489.00 | 9289521.00 | 176538.89 | 9289617.75 | 50       | LS-34  | 176675.00 | 9289881.00 | 176607.27 | 928997.65  | 100      | LS-54  | 176519.00 | 9289586.00 | 176542.00 | 9289863.00 | 100      |
| LS-15                 | 176490.00 | 9289538.00 | 176539.29 | 9289629.61 | 50       | LS-35  | 176610.00 | 9289955.00 | 176589.96 | 9289857.03 | 100      | LS-55  | 176483.00 | 9289519.00 | 176536.00 | 9289950.00 | 100      |
| LS-16                 | 176492.00 | 9289553.00 | 176541.75 | 9289648.03 | 50       | LS-36  | 176610.00 | 9289955.00 | 176546.40 | 9289545.14 | 100      | LS-56  | 176564.00 | 9289512.00 | 176502.00 | 9289954.00 | 100      |
| LS-17                 | 176497.00 | 9289569.00 | 176546.37 | 9289661.10 | 50       | LS-37  | 176638.00 | 9289452.00 | 176584.51 | 9289544.04 | 100      | LS-57  | 176564.00 | 9289640.00 | 176560.00 | 9289957.00 | 100      |
| LS-18                 | 176495.00 | 9289585.00 | 176544.92 | 9289662.33 | 50       | LS-38  | 176651.00 | 9289485.00 | 176524.20 | 9289584.74 | 100      | LS-58  | 176493.00 | 9289472.00 | 176506.00 | 9289953.00 | 100      |
| LS-19                 | 176497.00 | 9289593.00 | 176540.81 | 9289667.33 | 50       | LS-39  | 176657.00 | 9289603.00 | 176588.16 | 9289894.14 | 100      | LS-59  | 176548.00 | 9289457.00 | 176495.00 | 9289957.00 | 100      |
| LS-20                 | 176512.00 | 9289705.00 | 176530.40 | 9289751.49 | 50       | LS-40  | 176672.00 | 9289738.00 | 176591.62 | 9289836.25 | 100      | LS-60  | 176531.00 | 9289490.00 | 176545.00 | 9289954.00 | 100      |

CONFIDENCIAL

NOTAS:  
1. LA INFORMACIÓN TOPOGRÁFICA ESTÁ EN EL SISTEMA UTM WGS84, ZONA 18 SUR.  
2. LAS ESKALAS SON DE 1:1000 Y 1:500.  
3. LAS ESKALAS MOSTRAN EN LAS UNIDADES DEL SI, EN METROS.

ESTE PLANO Y LA INFORMACIÓN CONTENIDA SON PROPIEDAD DEL CLIENTE. SU USO SIN PERMISO POR ESCRITO DE LA EMPRESA, O CUALQUIER MODIFICACIÓN DE LOS DATOS CONTENIDOS EN ESTE PLANO, SERÁ LA RESPONSABILIDAD POR PARTE DEL CLIENTE.

DOCUMENTOS DE REFERENCIA

REV. A  
DESCRIPCIÓN

CLIENTE:

CONSULTOR:  
Ing. Nilsson Mori Sánchez  
CIP 175217

REVISIONES

REVISIONES PREVIAS

PROYECTO:

CONTRATACIÓN DE SERVICIO PARA LA DETERMINACIÓN DE LA ESTRATIGRAFÍA DE ÁREA NUCLEAR DE LA ZONA ARQUEOLÓGICA MONUMENTAL DE KUÉLAP  
NUMERO DE CONTRATO: Nº 030-2023-06A-SG/MC

TÍTULO:

PLANO DE PERFILES SÍSMICOS

ESCALA:

GRÁFICA

PLANO Nº:

LS-05

REV.

A



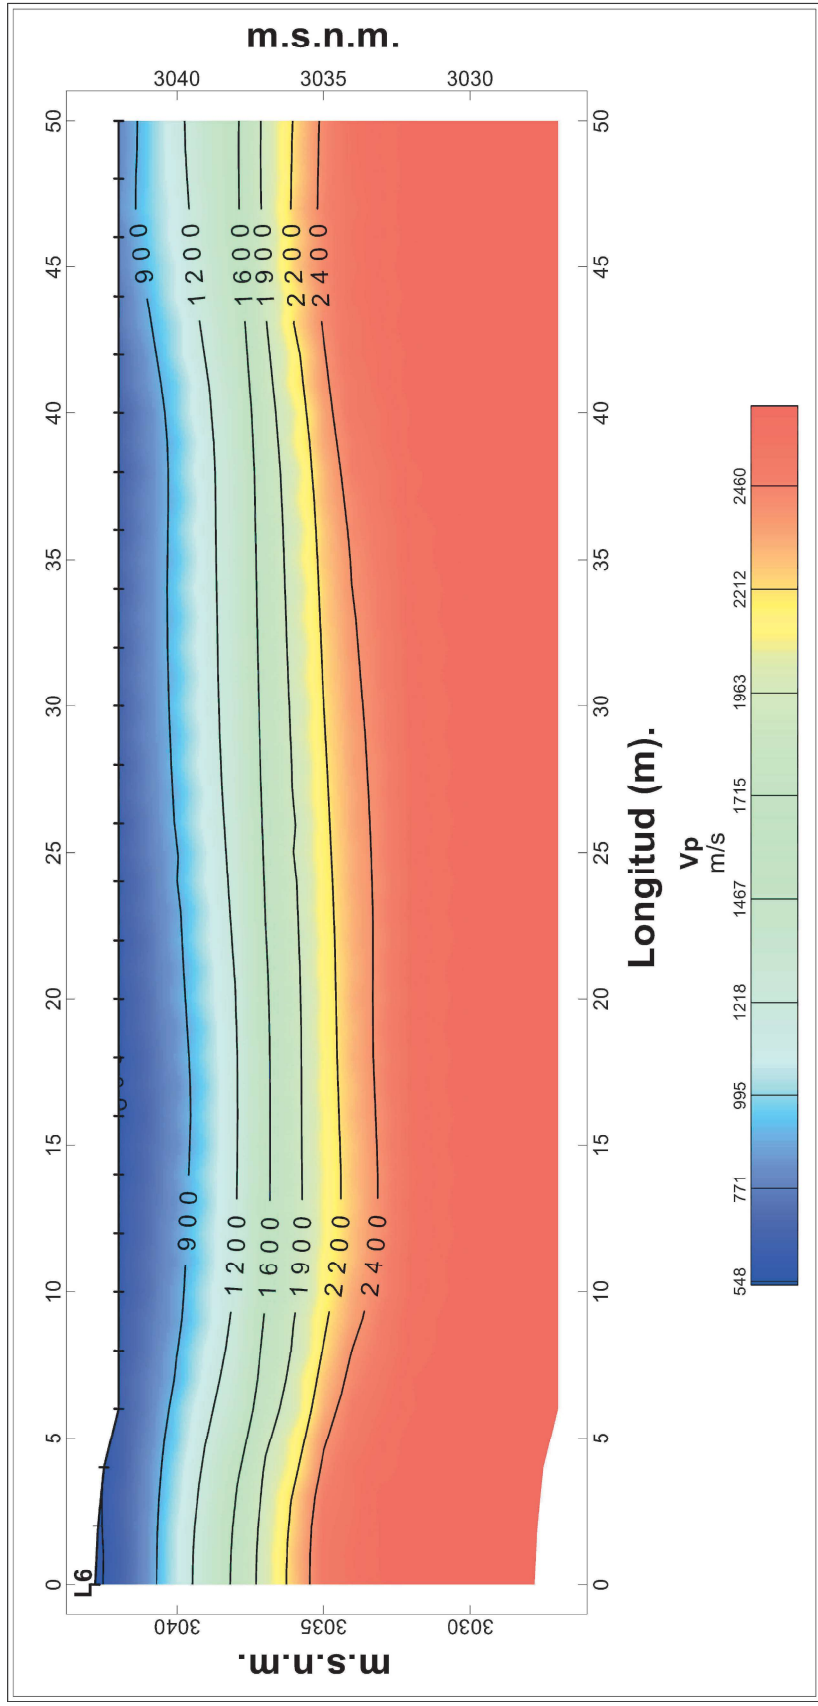

**PLANO DE LOCALIZACIÓN DEL PROYECTO**  
ESCALA: 1/10000

| Código | CUADRO DE COORDENADAS |         |         |            |      |       |         |         |         |            | Longitud | Código | Inicio  |         |         |            | Fin  |       |         |         | Longitud | Código     | Inicio |        |         |         | Fin     |            |     |  | Longitud |
|--------|-----------------------|---------|---------|------------|------|-------|---------|---------|---------|------------|----------|--------|---------|---------|---------|------------|------|-------|---------|---------|----------|------------|--------|--------|---------|---------|---------|------------|-----|--|----------|
|        | Este                  | Norte   | Este    | Norte      | Este | Norte | Este    | Norte   | Este    | Norte      |          |        | Este    | Norte   | Este    | Norte      | Este | Norte | Este    | Norte   |          |            | Este   | Norte  | Este    | Norte   |         |            |     |  |          |
| LS-01  | 1764800               | 9289450 | 1764693 | 9289506.11 | 50   | LS-21 | 1765400 | 9289861 | 1765293 | 9289793.34 | 100      | LS-41  | 1767400 | 9289761 | 1767340 | 9289661    | 100  | LS-61 | 1769400 | 9289661 | 1769340  | 9289561    | 100    | LS-81  | 1771400 | 9289561 | 1771340 | 9289461    | 100 |  |          |
| LS-02  | 1764800               | 9289532 | 1764697 | 9289589.63 | 50   | LS-22 | 1765500 | 9289865 | 1765393 | 9289798.95 | 100      | LS-42  | 1767500 | 9289765 | 1767440 | 9289665    | 100  | LS-62 | 1769500 | 9289665 | 1769440  | 9289565    | 100    | LS-82  | 1771500 | 9289565 | 1771440 | 9289465    | 100 |  |          |
| LS-03  | 1764900               | 9289606 | 1764701 | 9289707.42 | 100  | LS-23 | 1765600 | 9289866 | 1765493 | 9289784.77 | 100      | LS-43  | 1767600 | 9289766 | 1767540 | 9289666    | 100  | LS-63 | 1769600 | 9289666 | 1769540  | 9289566    | 100    | LS-83  | 1771600 | 9289566 | 1771540 | 9289466    | 100 |  |          |
| LS-04  | 1764900               | 9289606 | 1764505 | 9289787.42 | 100  | LS-24 | 1765600 | 9289866 | 1765151 | 9289798.77 | 100      | LS-44  | 1767600 | 9289766 | 1767104 | 9289666    | 100  | LS-64 | 1769600 | 9289666 | 1769104  | 9289566    | 100    | LS-84  | 1771600 | 9289566 | 1771104 | 9289466    | 100 |  |          |
| LS-05  | 1764800               | 9289760 | 1765083 | 9289666.37 | 100  | LS-25 | 1765500 | 9289863 | 1765401 | 9289683.91 | 50       | LS-45  | 1767500 | 9289763 | 1767401 | 9289683.91 | 50   | LS-65 | 1769500 | 9289663 | 1769401  | 9289583.40 | 100    | LS-85  | 1771500 | 9289563 | 1771401 | 9289483.40 | 100 |  |          |
| LS-06  | 1765000               | 9289856 | 1765120 | 9289866.09 | 50   | LS-26 | 1765600 | 9289863 | 1765601 | 9289687.91 | 50       | LS-46  | 1767600 | 9289763 | 1767601 | 9289687.91 | 50   | LS-66 | 1769600 | 9289663 | 1769601  | 9289583.40 | 100    | LS-86  | 1771600 | 9289563 | 1771601 | 9289483.40 | 100 |  |          |
| LS-07  | 1765000               | 9289857 | 1764905 | 9289537.46 | 50   | LS-27 | 1765400 | 9289861 | 1765441 | 9289687.91 | 50       | LS-47  | 1767400 | 9289761 | 1767441 | 9289687.91 | 50   | LS-67 | 1769400 | 9289661 | 1769441  | 9289561    | 100    | LS-87  | 1771400 | 9289561 | 1771441 | 9289461    | 100 |  |          |
| LS-08  | 1764800               | 9289533 | 1765399 | 9289534.06 | 50   | LS-28 | 1765300 | 9289862 | 1765272 | 9289994.92 | 100      | LS-48  | 1767300 | 9289762 | 1767252 | 9289896.92 | 100  | LS-68 | 1769300 | 9289662 | 1769252  | 9289562    | 100    | LS-88  | 1771300 | 9289562 | 1771252 | 9289462    | 100 |  |          |
| LS-09  | 1764900               | 9289547 | 1765404 | 9289541.36 | 50   | LS-29 | 1765400 | 9289863 | 1765387 | 9289992.44 | 100      | LS-49  | 1767500 | 9289763 | 1767487 | 9289898.44 | 100  | LS-69 | 1769500 | 9289663 | 1769487  | 9289563    | 100    | LS-89  | 1771500 | 9289563 | 1771487 | 9289463    | 100 |  |          |
| LS-10  | 1764900               | 9289565 | 1765417 | 9289561.36 | 50   | LS-30 | 1765400 | 9289867 | 1765389 | 9289991.44 | 100      | LS-50  | 1767500 | 9289763 | 1767509 | 9289899.44 | 100  | LS-70 | 1769500 | 9289663 | 1769509  | 9289563    | 100    | LS-90  | 1771500 | 9289563 | 1771509 | 9289463    | 100 |  |          |
| LS-11  | 1764900               | 9289580 | 1765440 | 9289574.48 | 50   | LS-31 | 1765500 | 9289866 | 1765713 | 9289946.09 | 100      | LS-51  | 1767600 | 9289764 | 1767613 | 9289896.09 | 100  | LS-71 | 1769600 | 9289664 | 1769613  | 9289564    | 100    | LS-91  | 1771600 | 9289564 | 1771613 | 9289464    | 100 |  |          |
| LS-12  | 1765200               | 9289590 | 1765703 | 9289631.19 | 50   | LS-32 | 1765300 | 9289865 | 1765599 | 9289964.83 | 100      | LS-52  | 1767400 | 9289763 | 1767533 | 9289896.83 | 100  | LS-72 | 1769400 | 9289663 | 1769533  | 9289563    | 100    | LS-92  | 1771400 | 9289563 | 1771533 | 9289463    | 100 |  |          |
| LS-13  | 1764900               | 9289602 | 1765747 | 9289604.04 | 100  | LS-33 | 1765600 | 9289875 | 1765959 | 9289968.50 | 100      | LS-53  | 1767600 | 9289765 | 1767852 | 9289898.50 | 100  | LS-73 | 1769600 | 9289665 | 1769852  | 9289565    | 100    | LS-93  | 1771600 | 9289565 | 1771852 | 9289465    | 100 |  |          |
| LS-14  | 1764800               | 9289621 | 1765388 | 9289671.75 | 50   | LS-34 | 1765700 | 9289881 | 1766027 | 9289975.65 | 100      | LS-54  | 1767700 | 9289766 | 1768027 | 9289897.65 | 100  | LS-74 | 1769700 | 9289666 | 1768027  | 9289566    | 100    | LS-94  | 1771700 | 9289566 | 1771827 | 9289466    | 100 |  |          |
| LS-15  | 1764900               | 9289638 | 1765399 | 9289629.61 | 50   | LS-35 | 1766100 | 9289895 | 1765889 | 9289877.03 | 100      | LS-55  | 1768100 | 9289767 | 1768389 | 9289877.03 | 100  | LS-75 | 1770100 | 9289667 | 1768389  | 9289567    | 100    | LS-95  | 1772100 | 9289567 | 1771827 | 9289467    | 100 |  |          |
| LS-16  | 1764900               | 9289650 | 1765399 | 9289648.03 | 50   | LS-36 | 1766100 | 9289852 | 1765640 | 9289545.14 | 100      | LS-56  | 1768100 | 9289767 | 1768389 | 9289545.14 | 100  | LS-76 | 1770100 | 9289667 | 1768389  | 9289567    | 100    | LS-96  | 1772100 | 9289567 | 1771827 | 9289467    | 100 |  |          |
| LS-17  | 1764900               | 9289669 | 1765463 | 9289661.10 | 50   | LS-37 | 1766300 | 9289845 | 1765841 | 9289574.04 | 100      | LS-57  | 1768300 | 9289768 | 1768424 | 9289574.04 | 100  | LS-77 | 1770300 | 9289670 | 1768424  | 9289570    | 100    | LS-97  | 1772300 | 9289570 | 1771824 | 9289470    | 100 |  |          |
| LS-18  | 1764900               | 9289685 | 1765492 | 9289682.23 | 50   | LS-38 | 1766300 | 9289845 | 1765841 | 9289574.04 | 100      | LS-58  | 1768300 | 9289768 | 1768424 | 9289574.04 | 100  | LS-78 | 1770300 | 9289670 | 1768424  | 9289570    | 100    | LS-98  | 1772300 | 9289570 | 1771824 | 9289470    | 100 |  |          |
| LS-19  | 1765000               | 9289693 | 1765466 | 9289697.33 | 50   | LS-39 | 1766500 | 9289840 | 1765868 | 9289584.25 | 100      | LS-59  | 1768500 | 9289769 | 1768424 | 9289584.25 | 100  | LS-79 | 1770500 | 9289671 | 1768424  | 9289571    | 100    | LS-99  | 1772500 | 9289571 | 1771824 | 9289471    | 100 |  |          |
| LS-20  | 1765100               | 9289705 | 1765540 | 9289751.49 | 100  | LS-40 | 1766500 | 9289840 | 1765868 | 9289584.25 | 100      | LS-60  | 1768500 | 9289769 | 1768424 | 9289584.25 | 100  | LS-80 | 1770500 | 9289671 | 1768424  | 9289571    | 100    | LS-100 | 1772500 | 9289571 | 1771824 | 9289471    | 100 |  |          |

[illegible]





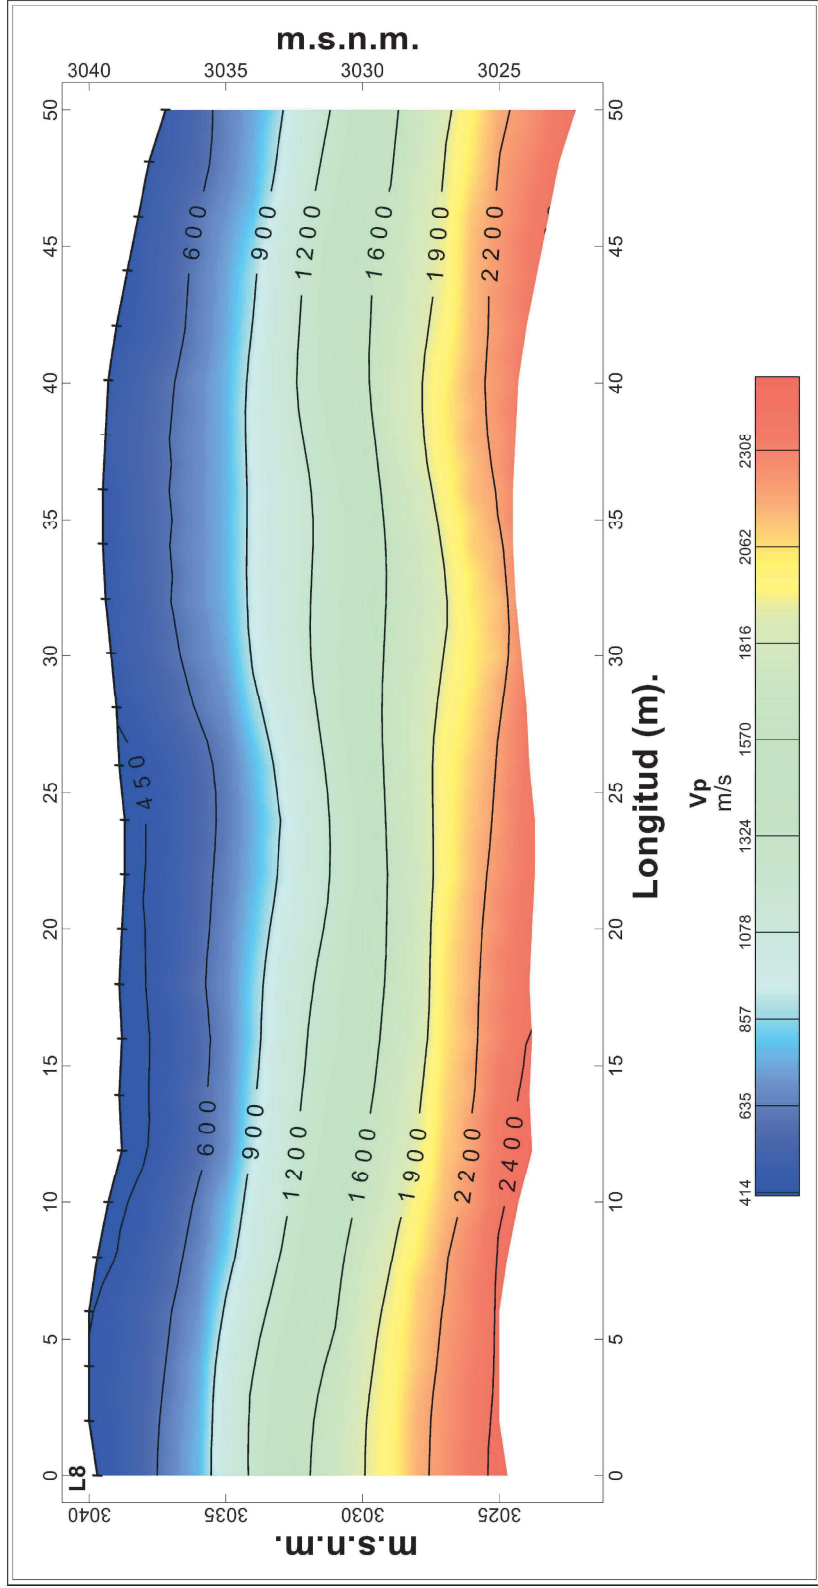

PLANO DE LOCALIZACIÓN DEL PROYECTO

| Código | CUADRO DE COORDENADAS |         |         |         |          |        |       |         |         |         | Código  | Longitud | Este | Norte | Fin     | Este    | Norte   | Inicio  | Este | Norte | Fin     | Este    | Norte   | Inicio  | Este | Norte | Fin     | Este    | Norte   | Longitud |      |       |       |         |         |         |         |       |       |         |         |         |         |       |      |       |          |         |         |         |    |     |       |         |         |         |         |     |       |         |         |         |         |    |     |       |         |         |         |         |    |     |       |         |         |         |         |     |       |         |         |         |         |    |     |       |         |         |         |         |    |    |       |         |         |         |         |     |       |         |         |         |         |    |     |       |         |         |         |         |    |    |       |         |         |         |         |     |       |         |         |         |         |    |     |       |         |         |         |         |    |     |       |         |         |         |         |     |       |         |         |         |         |    |     |       |         |         |         |         |    |     |       |         |         |         |         |     |       |         |         |         |         |    |     |       |         |         |         |         |    |     |       |         |         |         |         |     |       |         |         |         |         |    |     |       |         |         |         |         |    |     |       |         |         |         |         |     |       |         |         |         |         |    |     |       |         |         |         |         |    |     |       |         |         |         |         |     |       |         |         |         |         |    |     |       |         |         |         |         |    |     |       |         |         |         |         |     |       |         |         |         |         |    |     |       |         |         |         |         |    |     |       |         |         |         |         |     |       |         |         |         |         |    |     |       |         |         |         |         |    |     |       |         |         |         |         |     |       |         |         |         |         |    |     |       |         |         |         |         |    |     |       |         |         |         |         |     |       |         |         |         |         |    |     |       |         |         |         |         |     |       |         |         |         |         |     |       |         |         |         |         |    |     |       |         |         |         |         |    |     |       |         |         |         |         |     |       |         |         |         |         |    |     |       |         |         |         |         |    |     |       |         |         |         |         |     |       |         |         |         |         |    |     |       |         |         |         |         |    |     |       |         |         |         |         |    |     |       |         |         |         |         |    |     |       |         |         |         |         |    |     |       |         |         |         |         |    |     |       |         |         |         |         |    |     |       |         |         |         |         |    |     |       |         |         |         |         |    |     |       |         |         |         |         |    |     |       |         |         |         |         |    |     |       |         |         |         |         |    |     |       |         |         |         |         |    |     |       |         |         |         |         |    |     |       |         |         |         |         |    |     |       |         |         |         |         |    |     |       |         |         |         |         |    |     |       |         |         |         |         |    |     |       |         |         |         |         |    |     |       |         |         |         |         |    |     |       |         |         |         |         |    |     |       |         |         |         |         |    |     |       |         |         |         |         |    |     |       |         |         |         |         |    |     |       |         |         |         |         |    |     |       |         |         |         |         |    |     |       |         |         |         |         |    |     |       |         |         |         |         |    |     |       |         |         |         |         |    |     |       |         |         |         |         |    |     |       |         |         |         |         |    |     |       |         |         |         |         |    |     |       |         |         |         |         |    |     |       |         |         |         |         |    |     |       |         |         |         |         |    |     |       |         |         |         |         |    |     |       |         |         |         |         |    |     |       |         |         |         |         |    |     |       |         |         |         |         |    |     |       |         |         |         |         |    |     |       |         |         |         |         |    |     |       |         |         |         |         |    |     |       |         |         |         |         |    |     |       |         |         |         |         |    |     |       |         |         |         |         |    |     |       |         |         |         |         |    |     |       |         |         |         |         |    |     |       |         |         |         |         |    |     |       |         |         |         |         |    |     |       |         |         |         |         |    |     |       |         |         |         |         |    |     |       |         |         |         |         |    |     |       |         |         |         |         |    |     |       |         |         |         |         |    |     |       |         |         |         |         |    |     |       |         |         |         |         |    |     |       |         |         |         |         |    |     |       |         |         |         |         |    |     |       |         |         |         |         |    |     |       |         |         |         |         |    |     |       |         |         |         |         |    |     |       |         |         |         |         |    |     |       |         |         |         |         |    |     |       |         |         |         |         |    |     |       |         |         |         |         |    |     |       |         |         |         |         |    |     |       |         |         |         |         |
|--------|-----------------------|---------|---------|---------|----------|--------|-------|---------|---------|---------|---------|----------|------|-------|---------|---------|---------|---------|------|-------|---------|---------|---------|---------|------|-------|---------|---------|---------|----------|------|-------|-------|---------|---------|---------|---------|-------|-------|---------|---------|---------|---------|-------|------|-------|----------|---------|---------|---------|----|-----|-------|---------|---------|---------|---------|-----|-------|---------|---------|---------|---------|----|-----|-------|---------|---------|---------|---------|----|-----|-------|---------|---------|---------|---------|-----|-------|---------|---------|---------|---------|----|-----|-------|---------|---------|---------|---------|----|----|-------|---------|---------|---------|---------|-----|-------|---------|---------|---------|---------|----|-----|-------|---------|---------|---------|---------|----|----|-------|---------|---------|---------|---------|-----|-------|---------|---------|---------|---------|----|-----|-------|---------|---------|---------|---------|----|-----|-------|---------|---------|---------|---------|-----|-------|---------|---------|---------|---------|----|-----|-------|---------|---------|---------|---------|----|-----|-------|---------|---------|---------|---------|-----|-------|---------|---------|---------|---------|----|-----|-------|---------|---------|---------|---------|----|-----|-------|---------|---------|---------|---------|-----|-------|---------|---------|---------|---------|----|-----|-------|---------|---------|---------|---------|----|-----|-------|---------|---------|---------|---------|-----|-------|---------|---------|---------|---------|----|-----|-------|---------|---------|---------|---------|----|-----|-------|---------|---------|---------|---------|-----|-------|---------|---------|---------|---------|----|-----|-------|---------|---------|---------|---------|----|-----|-------|---------|---------|---------|---------|-----|-------|---------|---------|---------|---------|----|-----|-------|---------|---------|---------|---------|----|-----|-------|---------|---------|---------|---------|-----|-------|---------|---------|---------|---------|----|-----|-------|---------|---------|---------|---------|----|-----|-------|---------|---------|---------|---------|-----|-------|---------|---------|---------|---------|----|-----|-------|---------|---------|---------|---------|----|-----|-------|---------|---------|---------|---------|-----|-------|---------|---------|---------|---------|----|-----|-------|---------|---------|---------|---------|-----|-------|---------|---------|---------|---------|-----|-------|---------|---------|---------|---------|----|-----|-------|---------|---------|---------|---------|----|-----|-------|---------|---------|---------|---------|-----|-------|---------|---------|---------|---------|----|-----|-------|---------|---------|---------|---------|----|-----|-------|---------|---------|---------|---------|-----|-------|---------|---------|---------|---------|----|-----|-------|---------|---------|---------|---------|----|-----|-------|---------|---------|---------|---------|----|-----|-------|---------|---------|---------|---------|----|-----|-------|---------|---------|---------|---------|----|-----|-------|---------|---------|---------|---------|----|-----|-------|---------|---------|---------|---------|----|-----|-------|---------|---------|---------|---------|----|-----|-------|---------|---------|---------|---------|----|-----|-------|---------|---------|---------|---------|----|-----|-------|---------|---------|---------|---------|----|-----|-------|---------|---------|---------|---------|----|-----|-------|---------|---------|---------|---------|----|-----|-------|---------|---------|---------|---------|----|-----|-------|---------|---------|---------|---------|----|-----|-------|---------|---------|---------|---------|----|-----|-------|---------|---------|---------|---------|----|-----|-------|---------|---------|---------|---------|----|-----|-------|---------|---------|---------|---------|----|-----|-------|---------|---------|---------|---------|----|-----|-------|---------|---------|---------|---------|----|-----|-------|---------|---------|---------|---------|----|-----|-------|---------|---------|---------|---------|----|-----|-------|---------|---------|---------|---------|----|-----|-------|---------|---------|---------|---------|----|-----|-------|---------|---------|---------|---------|----|-----|-------|---------|---------|---------|---------|----|-----|-------|---------|---------|---------|---------|----|-----|-------|---------|---------|---------|---------|----|-----|-------|---------|---------|---------|---------|----|-----|-------|---------|---------|---------|---------|----|-----|-------|---------|---------|---------|---------|----|-----|-------|---------|---------|---------|---------|----|-----|-------|---------|---------|---------|---------|----|-----|-------|---------|---------|---------|---------|----|-----|-------|---------|---------|---------|---------|----|-----|-------|---------|---------|---------|---------|----|-----|-------|---------|---------|---------|---------|----|-----|-------|---------|---------|---------|---------|----|-----|-------|---------|---------|---------|---------|----|-----|-------|---------|---------|---------|---------|----|-----|-------|---------|---------|---------|---------|----|-----|-------|---------|---------|---------|---------|----|-----|-------|---------|---------|---------|---------|----|-----|-------|---------|---------|---------|---------|----|-----|-------|---------|---------|---------|---------|----|-----|-------|---------|---------|---------|---------|----|-----|-------|---------|---------|---------|---------|----|-----|-------|---------|---------|---------|---------|----|-----|-------|---------|---------|---------|---------|----|-----|-------|---------|---------|---------|---------|----|-----|-------|---------|---------|---------|---------|----|-----|-------|---------|---------|---------|---------|----|-----|-------|---------|---------|---------|---------|----|-----|-------|---------|---------|---------|---------|----|-----|-------|---------|---------|---------|---------|----|-----|-------|---------|---------|---------|---------|----|-----|-------|---------|---------|---------|---------|----|-----|-------|---------|---------|---------|---------|----|-----|-------|---------|---------|---------|---------|----|-----|-------|---------|---------|---------|---------|----|-----|-------|---------|---------|---------|---------|----|-----|-------|---------|---------|---------|---------|----|-----|-------|---------|---------|---------|---------|----|-----|-------|---------|---------|---------|---------|----|-----|-------|---------|---------|---------|---------|----|-----|-------|---------|---------|---------|---------|
|        | Este                  | Norte   | Este    | Norte   | Longitud | Código | Este  | Norte   | Este    | Norte   |         |          |      |       |         |         |         |         |      |       |         |         |         |         |      |       |         |         |         |          | Este | Norte | Este  | Norte   | Este    | Norte   | Este    | Norte | Este  | Norte   | Este    | Norte   | Este    | Norte | Este | Norte | Longitud |         |         |         |    |     |       |         |         |         |         |     |       |         |         |         |         |    |     |       |         |         |         |         |    |     |       |         |         |         |         |     |       |         |         |         |         |    |     |       |         |         |         |         |    |    |       |         |         |         |         |     |       |         |         |         |         |    |     |       |         |         |         |         |    |    |       |         |         |         |         |     |       |         |         |         |         |    |     |       |         |         |         |         |    |     |       |         |         |         |         |     |       |         |         |         |         |    |     |       |         |         |         |         |    |     |       |         |         |         |         |     |       |         |         |         |         |    |     |       |         |         |         |         |    |     |       |         |         |         |         |     |       |         |         |         |         |    |     |       |         |         |         |         |    |     |       |         |         |         |         |     |       |         |         |         |         |    |     |       |         |         |         |         |    |     |       |         |         |         |         |     |       |         |         |         |         |    |     |       |         |         |         |         |    |     |       |         |         |         |         |     |       |         |         |         |         |    |     |       |         |         |         |         |    |     |       |         |         |         |         |     |       |         |         |         |         |    |     |       |         |         |         |         |    |     |       |         |         |         |         |     |       |         |         |         |         |    |     |       |         |         |         |         |    |     |       |         |         |         |         |     |       |         |         |         |         |    |     |       |         |         |         |         |     |       |         |         |         |         |     |       |         |         |         |         |    |     |       |         |         |         |         |    |     |       |         |         |         |         |     |       |         |         |         |         |    |     |       |         |         |         |         |    |     |       |         |         |         |         |     |       |         |         |         |         |    |     |       |         |         |         |         |    |     |       |         |         |         |         |    |     |       |         |         |         |         |    |     |       |         |         |         |         |    |     |       |         |         |         |         |    |     |       |         |         |         |         |    |     |       |         |         |         |         |    |     |       |         |         |         |         |    |     |       |         |         |         |         |    |     |       |         |         |         |         |    |     |       |         |         |         |         |    |     |       |         |         |         |         |    |     |       |         |         |         |         |    |     |       |         |         |         |         |    |     |       |         |         |         |         |    |     |       |         |         |         |         |    |     |       |         |         |         |         |    |     |       |         |         |         |         |    |     |       |         |         |         |         |    |     |       |         |         |         |         |    |     |       |         |         |         |         |    |     |       |         |         |         |         |    |     |       |         |         |         |         |    |     |       |         |         |         |         |    |     |       |         |         |         |         |    |     |       |         |         |         |         |    |     |       |         |         |         |         |    |     |       |         |         |         |         |    |     |       |         |         |         |         |    |     |       |         |         |         |         |    |     |       |         |         |         |         |    |     |       |         |         |         |         |    |     |       |         |         |         |         |    |     |       |         |         |         |         |    |     |       |         |         |         |         |    |     |       |         |         |         |         |    |     |       |         |         |         |         |    |     |       |         |         |         |         |    |     |       |         |         |         |         |    |     |       |         |         |         |         |    |     |       |         |         |         |         |    |     |       |         |         |         |         |    |     |       |         |         |         |         |    |     |       |         |         |         |         |    |     |       |         |         |         |         |    |     |       |         |         |         |         |    |     |       |         |         |         |         |    |     |       |         |         |         |         |    |     |       |         |         |         |         |    |     |       |         |         |         |         |    |     |       |         |         |         |         |    |     |       |         |         |         |         |    |     |       |         |         |         |         |    |     |       |         |         |         |         |    |     |       |         |         |         |         |    |     |       |         |         |         |         |    |     |       |         |         |         |         |    |     |       |         |         |         |         |    |     |       |         |         |         |         |    |     |       |         |         |         |         |    |     |       |         |         |         |         |    |     |       |         |         |         |         |    |     |       |         |         |         |         |    |     |       |         |         |         |         |    |     |       |         |         |         |         |    |     |       |         |         |         |         |
| L5-01  | 1764808               | 9289455 | 1764693 | 9289506 | 111      | 50     | L5-21 | 1765438 | 9289861 | 1765293 | 9289753 | 34       | 100  | L5-41 | 1767408 | 9289761 | 1765140 | 9289851 | 100  | L5-02 | 1764808 | 9289532 | 1764697 | 9289511 | 100  | L5-22 | 1765538 | 9289885 | 1765736 | 9289743  | 95   | 100   | L5-42 | 1767408 | 9289752 | 1765140 | 9289847 | 100   | L5-03 | 1764808 | 9289506 | 1764698 | 9289709 | 99    | 100  | L5-23 | 1765668  | 9289886 | 1765815 | 9289784 | 77 | 100 | L5-43 | 1767504 | 9289756 | 1765293 | 9289847 | 100 | L5-04 | 1764808 | 9289506 | 1764655 | 9289787 | 42 | 100 | L5-24 | 1765668 | 9289886 | 1765815 | 9289785 | 08 | 100 | L5-44 | 1767504 | 9289754 | 1765293 | 9289848 | 100 | L5-05 | 1764808 | 9289506 | 1765008 | 9289666 | 07 | 100 | L5-25 | 1765755 | 9289833 | 1765462 | 9289683 | 91 | 50 | L5-45 | 1767516 | 9289754 | 1765293 | 9289848 | 100 | L5-06 | 1764808 | 9289506 | 1765120 | 9289606 | 39 | 100 | L5-26 | 1765665 | 9289830 | 1765461 | 9289697 | 91 | 50 | L5-46 | 1767552 | 9289754 | 1765293 | 9289848 | 100 | L5-07 | 1765007 | 9289537 | 1764955 | 9289834 | 46 | 100 | L5-27 | 1765445 | 9289811 | 1765441 | 9289697 | 88 | 100 | L5-47 | 1767566 | 9289754 | 1765293 | 9289848 | 100 | L5-08 | 1764808 | 9289533 | 1765439 | 9289837 | 40 | 100 | L5-28 | 1765363 | 9289802 | 1765272 | 9289894 | 92 | 100 | L5-48 | 1767567 | 9289755 | 1765293 | 9289848 | 100 | L5-09 | 1764949 | 9289547 | 1765408 | 9289841 | 36 | 100 | L5-29 | 1765442 | 9289803 | 1765875 | 9289992 | 18 | 100 | L5-49 | 1767550 | 9289756 | 1765293 | 9289848 | 100 | L5-10 | 1764949 | 9289545 | 1765471 | 9289850 | 15 | 100 | L5-30 | 1765448 | 9289807 | 1765887 | 9289991 | 44 | 100 | L5-50 | 1767554 | 9289757 | 1765293 | 9289848 | 100 | L5-11 | 1764950 | 9289540 | 1765409 | 9289874 | 48 | 100 | L5-31 | 1765515 | 9289861 | 1765715 | 9289946 | 03 | 100 | L5-51 | 1767531 | 9289760 | 1765665 | 9289845 | 100 | L5-12 | 1765210 | 9289591 | 1765703 | 9289581 | 19 | 100 | L5-32 | 1765633 | 9289865 | 1765599 | 9289964 | 89 | 100 | L5-52 | 1767533 | 9289760 | 1765633 | 9289840 | 100 | L5-13 | 1764808 | 9289502 | 1764767 | 9289604 | 04 | 100 | L5-33 | 1765666 | 9288975 | 1765956 | 9289968 | 50 | 100 | L5-53 | 1767585 | 9289597 | 1765402 | 9289863 | 100 | L5-14 | 1764808 | 9289521 | 1765388 | 9289617 | 75 | 100 | L5-34 | 1765755 | 9289881 | 1767027 | 9289976 | 65 | 100 | L5-54 | 1767519 | 9289886 | 1765402 | 9289866 | 100 | L5-15 | 1764900 | 9289538 | 1765329 | 9289628 | 61 | 100 | L5-35 | 1766100 | 9289955 | 1765896 | 9289857 | 03 | 100 | L5-55 | 1767683 | 9289519 | 1765306 | 9289590 | 100 | L5-16 | 1764902 | 9289563 | 1765471 | 9289648 | 03 | 100 | L5-36 | 1765710 | 9289452 | 1765466 | 9289545 | 100 | L5-56 | 1767684 | 9289519 | 1765306 | 9289584 | 100 | L5-17 | 1764907 | 9289569 | 1765466 | 9289662 | 10 | 100 | L5-37 | 1765836 | 9289485 | 1765841 | 9289544 | 04 | 100 | L5-57 | 1767684 | 9289607 | 1765306 | 9289584 | 100 | L5-18 | 1764905 | 9289585 | 1765492 | 9289682 | 23 | 100 | L5-38 | 1765710 | 9289485 | 1765240 | 9289584 | 04 | 100 | L5-58 | 1767693 | 9289497 | 1765240 | 9289584 | 100 | L5-19 | 1764907 | 9289595 | 1765466 | 9289671 | 33 | 100 | L5-39 | 1765727 | 9289803 | 1765686 | 9289836 | 25 | 100 | L5-59 | 1767533 | 9289788 | 1765686 | 9289836 | 25 | 100 | L5-20 | 1765120 | 9289705 | 1765400 | 9289751 | 49 | 100 | L5-60 | 1767531 | 9289788 | 1765686 | 9289836 | 25 | 100 | L5-60 | 1765120 | 9289705 | 1765400 | 9289751 | 49 | 100 | L5-60 | 1765120 | 9289705 | 1765400 | 9289751 | 49 | 100 | L5-60 | 1765120 | 9289705 | 1765400 | 9289751 | 49 | 100 | L5-60 | 1765120 | 9289705 | 1765400 | 9289751 | 49 | 100 | L5-60 | 1765120 | 9289705 | 1765400 | 9289751 | 49 | 100 | L5-60 | 1765120 | 9289705 | 1765400 | 9289751 | 49 | 100 | L5-60 | 1765120 | 9289705 | 1765400 | 9289751 | 49 | 100 | L5-60 | 1765120 | 9289705 | 1765400 | 9289751 | 49 | 100 | L5-60 | 1765120 | 9289705 | 1765400 | 9289751 | 49 | 100 | L5-60 | 1765120 | 9289705 | 1765400 | 9289751 | 49 | 100 | L5-60 | 1765120 | 9289705 | 1765400 | 9289751 | 49 | 100 | L5-60 | 1765120 | 9289705 | 1765400 | 9289751 | 49 | 100 | L5-60 | 1765120 | 9289705 | 1765400 | 9289751 | 49 | 100 | L5-60 | 1765120 | 9289705 | 1765400 | 9289751 | 49 | 100 | L5-60 | 1765120 | 9289705 | 1765400 | 9289751 | 49 | 100 | L5-60 | 1765120 | 9289705 | 1765400 | 9289751 | 49 | 100 | L5-60 | 1765120 | 9289705 | 1765400 | 9289751 | 49 | 100 | L5-60 | 1765120 | 9289705 | 1765400 | 9289751 | 49 | 100 | L5-60 | 1765120 | 9289705 | 1765400 | 9289751 | 49 | 100 | L5-60 | 1765120 | 9289705 | 1765400 | 9289751 | 49 | 100 | L5-60 | 1765120 | 9289705 | 1765400 | 9289751 | 49 | 100 | L5-60 | 1765120 | 9289705 | 1765400 | 9289751 | 49 | 100 | L5-60 | 1765120 | 9289705 | 1765400 | 9289751 | 49 | 100 | L5-60 | 1765120 | 9289705 | 1765400 | 9289751 | 49 | 100 | L5-60 | 1765120 | 9289705 | 1765400 | 9289751 | 49 | 100 | L5-60 | 1765120 | 9289705 | 1765400 | 9289751 | 49 | 100 | L5-60 | 1765120 | 9289705 | 1765400 | 9289751 | 49 | 100 | L5-60 | 1765120 | 9289705 | 1765400 | 9289751 | 49 | 100 | L5-60 | 1765120 | 9289705 | 1765400 | 9289751 | 49 | 100 | L5-60 | 1765120 | 9289705 | 1765400 | 9289751 | 49 | 100 | L5-60 | 1765120 | 9289705 | 1765400 | 9289751 | 49 | 100 | L5-60 | 1765120 | 9289705 | 1765400 | 9289751 | 49 | 100 | L5-60 | 1765120 | 9289705 | 1765400 | 9289751 | 49 | 100 | L5-60 | 1765120 | 9289705 | 1765400 | 9289751 | 49 | 100 | L5-60 | 1765120 | 9289705 | 1765400 | 9289751 | 49 | 100 | L5-60 | 1765120 | 9289705 | 1765400 | 9289751 | 49 | 100 | L5-60 | 1765120 | 9289705 | 1765400 | 9289751 | 49 | 100 | L5-60 | 1765120 | 9289705 | 1765400 | 9289751 | 49 | 100 | L5-60 | 1765120 | 9289705 | 1765400 | 9289751 | 49 | 100 | L5-60 | 1765120 | 9289705 | 1765400 | 9289751 | 49 | 100 | L5-60 | 1765120 | 9289705 | 1765400 | 9289751 | 49 | 100 | L5-60 | 1765120 | 9289705 | 1765400 | 9289751 | 49 | 100 | L5-60 | 1765120 | 9289705 | 1765400 | 9289751 | 49 | 100 | L5-60 | 1765120 | 9289705 | 1765400 | 9289751 | 49 | 100 | L5-60 | 1765120 | 9289705 | 1765400 | 9289751 | 49 | 100 | L5-60 | 1765120 | 9289705 | 1765400 | 9289751 | 49 | 100 | L5-60 | 1765120 | 9289705 | 1765400 | 9289751 | 49 | 100 | L5-60 | 1765120 | 9289705 | 1765400 | 9289751 | 49 | 100 | L5-60 | 1765120 | 9289705 | 1765400 | 9289751 | 49 | 100 | L5-60 | 1765120 | 9289705 | 1765400 | 9289751 | 49 | 100 | L5-60 | 1765120 | 9289705 | 1765400 | 9289751 | 49 | 100 | L5-60 | 1765120 | 9289705 | 1765400 | 9289751 | 49 | 100 | L5-60 | 1765120 | 9289705 | 1765400 | 9289751 | 49 | 100 | L5-60 | 1765120 | 9289705 | 1765400 | 9289751 | 49 | 100 | L5-60 | 1765120 | 9289705 | 1765400 | 9289751 | 49 | 100 | L5-60 | 1765120 | 9289705 | 1765400 | 9289751 | 49 | 100 | L5-60 | 1765120 | 9289705 | 1765400 | 9289751 | 49 | 100 | L5-60 | 1765120 | 9289705 | 1765400 | 9289751 | 49 | 100 | L5-60 | 1765120 | 9289705 | 1765400 | 9289751 | 49 | 100 | L5-60 | 1765120 | 9289705 | 1765400 | 9289751 | 49 | 100 | L5-60 | 1765120 | 9289705 | 1765400 | 9289751 | 49 | 100 | L5-60 | 1765120 | 9289705 | 1765400 | 9289751 |

CONFIDENTIAL

**ESTE PLANO Y LA INFORMACION CONTENIDA SON PROPIEDAD DEL CLIENTE. SU USO SIN PREVIA AUTORIZACION ESTA PROHIBIDA. CUALQUIER MODIFICACION DE LOS DATOS CONTENIDOS EN ESTE PLANO SERA RESPONSABILIDAD EXCLUSIVA DEL USUARIO SIN NINGUNA RESPONSABILIDAD LEGAL POR PARTE DEL CLIENTE.**

NOTAS:

1. LA INFORMACION TOPOGRAFICA ESTA EN EL SISTEMA UTM WGS84, ZONA 18 SUR.
2. LA UNIDAD PARA LAS DIMENSIONES ES EN METROS Y LAS ELEVACIONES EN M.S.N.M., SALVO SE INDIQUE LO CONTRARIO.
3. LAS ESCALAS MOSTRADAS ES PARA EL FORMATO A1.

DOCUMENTOS DE REFERENCIA

| REV. | DESCRIPCIÓN |
|------|-------------|
| A    |             |
|      |             |
|      |             |
|      |             |

REVISIONES

| DIBUJO   | PREPARO  | APROBÓ  | AUTORIZÓ |
|----------|----------|---------|----------|
| S-BLANCO | S-BLANCO | N. MORI | N. MORI  |
|          |          |         |          |
|          |          |         |          |
|          |          |         |          |

CLIENTE:

[illegible]

Ing. Nilsson Mori Sánchez

PROYECTO:

CONTRATACIÓN DE SERVICIO PARA LA DETERMINACIÓN DE LA ESTRATIGRAFÍA DEL ÁREA  
NUCLEAR DE LA ZONA ARQUEOLÓGICA MONUMENTAL DE KUÉLAP  
NÚMERO DE CONTRATO: N° 030-2023-OGA-SG/MC

TITULO:

|         |         |           |       |      |   |
|---------|---------|-----------|-------|------|---|
| ESCALA: | GRÁFICA | PLANO N°: | LS-08 | REV. | A |
|---------|---------|-----------|-------|------|---|





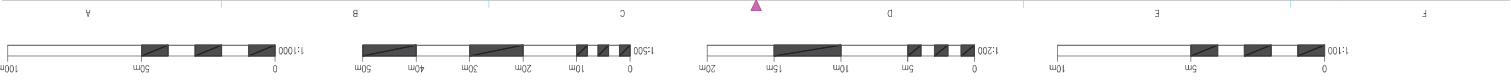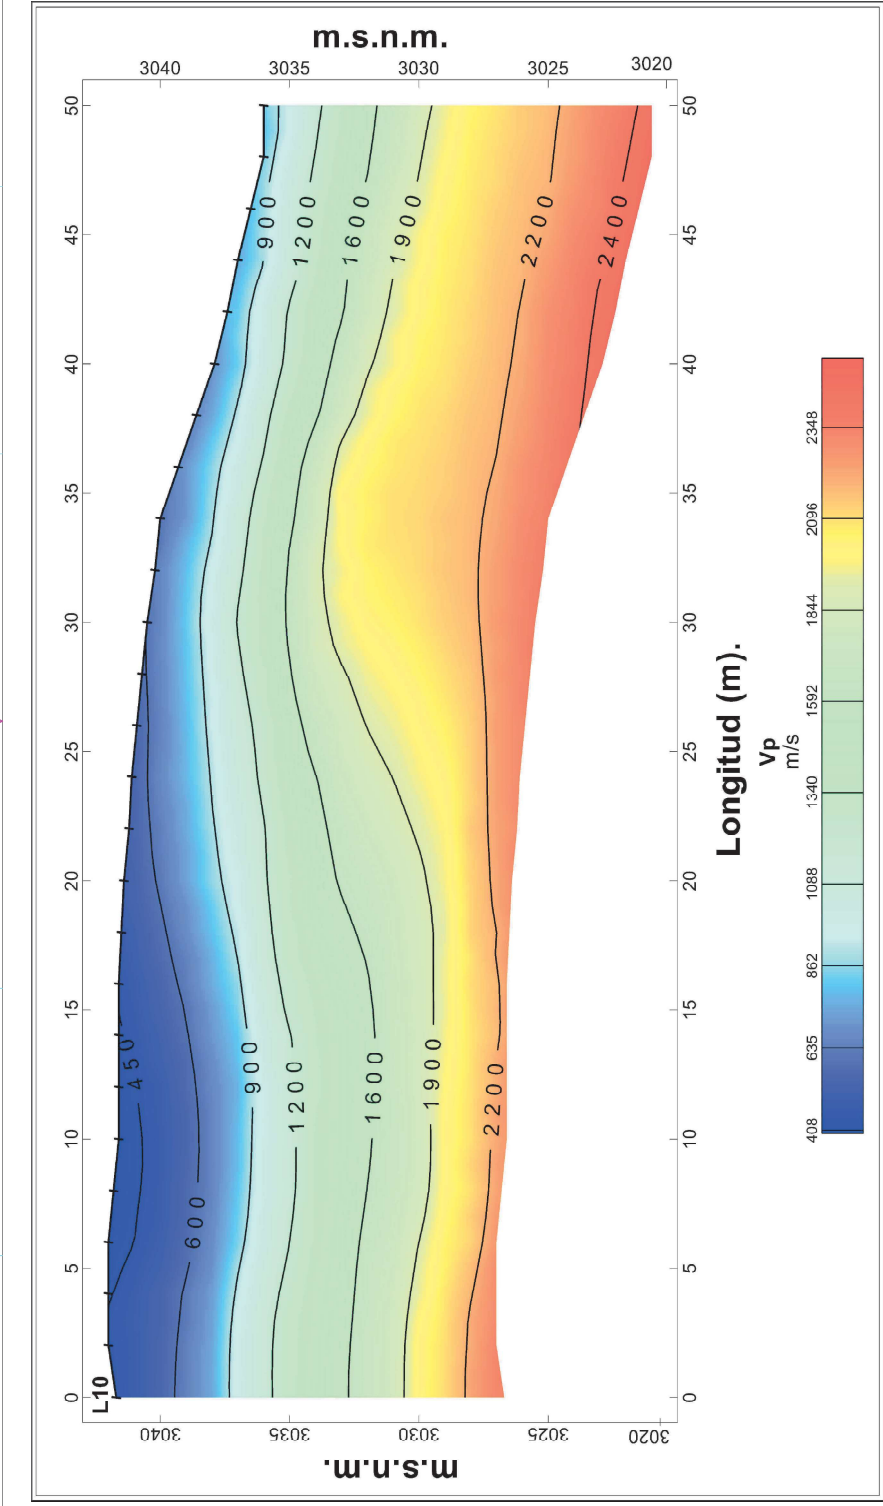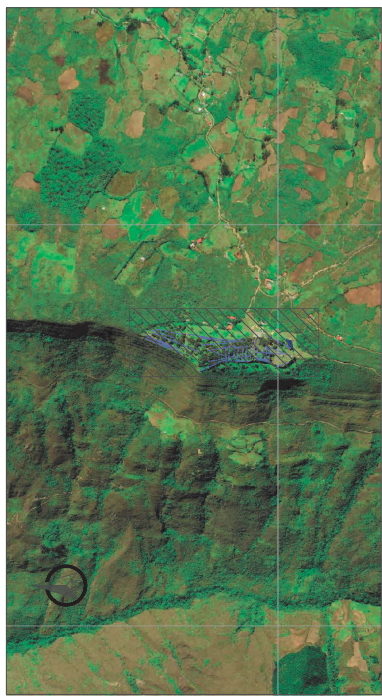

PLANO DE LOCALIZACIÓN DEL PROYECTO

ESCALA 1/1000

|                                                                                                                                                                                                                                                                                                                                                 |                                                                                                                                                                                           |             |                          |                       |             |          |          |         |          |                                                                                     |           |
|-------------------------------------------------------------------------------------------------------------------------------------------------------------------------------------------------------------------------------------------------------------------------------------------------------------------------------------------------|-------------------------------------------------------------------------------------------------------------------------------------------------------------------------------------------|-------------|--------------------------|-----------------------|-------------|----------|----------|---------|----------|-------------------------------------------------------------------------------------|-----------|
| CONFIDENCIAL<br>ESTE PLANO Y LA INFORMACIÓN<br>CONTENIDA SON PROPIEDAD DEL<br>CLIENTE. SU USO SIN PERMISO<br>ESCRITO DE LA EMPRESA CONSTITUYE<br>UNA FALTA. CUALQUIER MODIFICACIÓN<br>DE LOS DATOS CONTENIDOS EN ESTE<br>PLANO DEBE SER RESPONSABILIDAD<br>EXCLUSIVA DEL USUARIO SIN<br>NINGUNA RESPONSABILIDAD LEGAL<br>POR PARTE DEL CLIENTE. | NOTAS:<br>1. LA INFORMACIÓN TOPOGRÁFICA ESTÁ EN EL SISTEMA UTM WGS84, ZONA 18 SUR.<br>2. LAS ELEVACIONES SON EN METROS.<br>3. LAS ELEVACIONES MOSTRADAS EN EL PLANO SON LAS DEL CONTRATO. |             | DOCUMENTOS DE REFERENCIA |                       | REVISIONES  |          |          |         | CLIENTE: | PROYECTO:                                                                           |           |
|                                                                                                                                                                                                                                                                                                                                                 | REV.                                                                                                                                                                                      | DESCRIPCIÓN | FECHA                    | EMITIDO PARA REVISIÓN | DESCRIPCIÓN | DEBILLO  | PREPARO  | APROBÓ  | AUTORIZO |  |           |
|                                                                                                                                                                                                                                                                                                                                                 | A                                                                                                                                                                                         |             | 04/07/23                 |                       |             | S-BLANCO | S-BLANCO | N. MORI | N. MORI  |                                                                                     |           |
|                                                                                                                                                                                                                                                                                                                                                 |                                                                                                                                                                                           |             |                          |                       |             |          |          |         |          |                                                                                     |           |
|                                                                                                                                                                                                                                                                                                                                                 |                                                                                                                                                                                           |             |                          |                       |             |          |          |         |          |                                                                                     |           |
|                                                                                                                                                                                                                                                                                                                                                 |                                                                                                                                                                                           |             |                          |                       |             |          |          |         |          |                                                                                     |           |
|                                                                                                                                                                                                                                                                                                                                                 |                                                                                                                                                                                           |             |                          |                       |             |          |          |         |          |                                                                                     |           |
|                                                                                                                                                                                                                                                                                                                                                 |                                                                                                                                                                                           |             |                          |                       |             |          |          |         |          | CONSULTOR:                                                                          |           |
|                                                                                                                                                                                                                                                                                                                                                 |                                                                                                                                                                                           |             |                          |                       |             |          |          |         |          | Ing. Nilsson Mori Sánchez<br>CIP 175217                                             |           |
|                                                                                                                                                                                                                                                                                                                                                 |                                                                                                                                                                                           |             |                          |                       |             |          |          |         |          | ESCALA: GRAFICA                                                                     | PLANO Nº: |
|                                                                                                                                                                                                                                                                                                                                                 |                                                                                                                                                                                           |             |                          |                       |             |          |          |         |          |                                                                                     | LS-10     |
|                                                                                                                                                                                                                                                                                                                                                 |                                                                                                                                                                                           |             |                          |                       |             |          |          |         |          |                                                                                     | REV. A    |







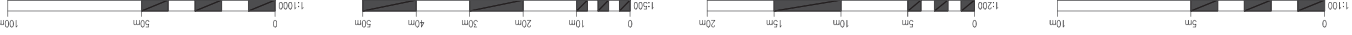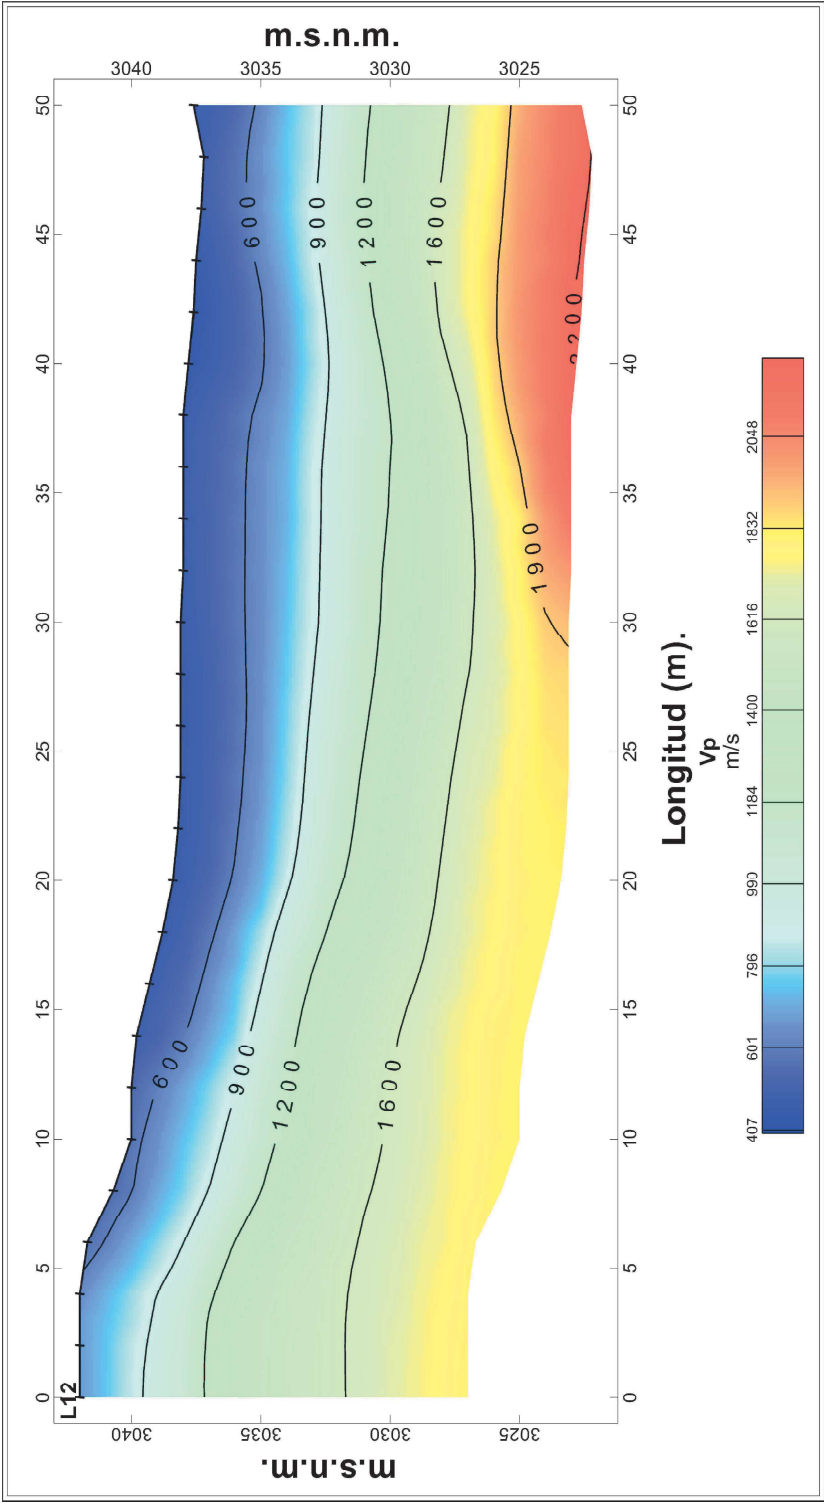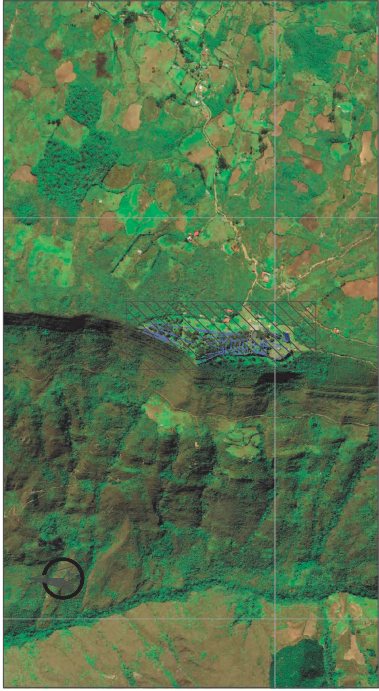

PLANO DE LOCALIZACIÓN DEL PROYECTO

ESCALA 1/10000

CONFERENCIAL

- ESTE PLANO Y LA INFORMACION CONTENIDA SON PROPIEDAD DEL CLIENTE. SU USO SIN PERMISO POR ESCRITO DE LA EMPRESA, CONSTITUYE UNA FALTA. CUALQUIER MODIFICACION DE LOS DATOS CONTENIDOS EN ESTE PLANO DEBE SER RESPONSABILIDAD DEL CLIENTE. LA EMPRESA NO Asume NINGUNA RESPONSABILIDAD LEGAL POR PARTE DEL CLIENTE.

NOTAS:

- LA INFORMACION TOPOGRAFICA ESTA EN EL SISTEMA UTM WGS84, ZONA 18 SUR.
- EL DATUM DE LA INFORMACION TOPOGRAFICA ES EL DATUM DE MONTECARLO.
- LOS DATOS DE LA INFORMACION TOPOGRAFICA SON DEL AÑO 2018.

DOCUMENTOS DE REFERENCIA

| REV. | FECHA    | DESCRIPCION           |
|------|----------|-----------------------|
| A    | 04/07/23 | EMITIDO PARA REVISION |

REVISIONES

| REV. | FECHA    | DESCRIPCION           | DEBILLO  | PREPARO  | APROBADO | AUTORIZADO |
|------|----------|-----------------------|----------|----------|----------|------------|
| A    | 04/07/23 | EMITIDO PARA REVISION | S-BLANCO | S-BLANCO | N. MORI  | N. MORI    |

CLIENTE:

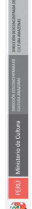

Ing. Nilsson Mori Sánchez  
CIP 175217

PROYECTO:

CONTRATACION DE SERVICIO PARA LA DETERMINACION DE LA ESTRATIGRAFIA DE AREA NUCLEAR DE LA ZONA ARQUEOLOGICA MONUMENTAL DE KUOLAP

TITULO:

PLANO DE PERFILES SISMICOS

ESCALA:

GRAFICA

PLANO N°:

LS-12

REVISIONES

LS-12

CONTRATACION DE SERVICIO PARA LA DETERMINACION DE LA ESTRATIGRAFIA DE AREA NUCLEAR DE LA ZONA ARQUEOLOGICA MONUMENTAL DE KUOLAP

NUMERO DE CONTRATO: N° 030-2023-OGA-SG/MC

PROYECTO:

CONTRATACION DE SERVICIO PARA LA DETERMINACION DE LA ESTRATIGRAFIA DE AREA NUCLEAR DE LA ZONA ARQUEOLOGICA MONUMENTAL DE KUOLAP

TITULO:

PLANO DE PERFILES SISMICOS

ESCALA:

GRAFICA

PLANO N°:

LS-12

REVISIONES

LS-12

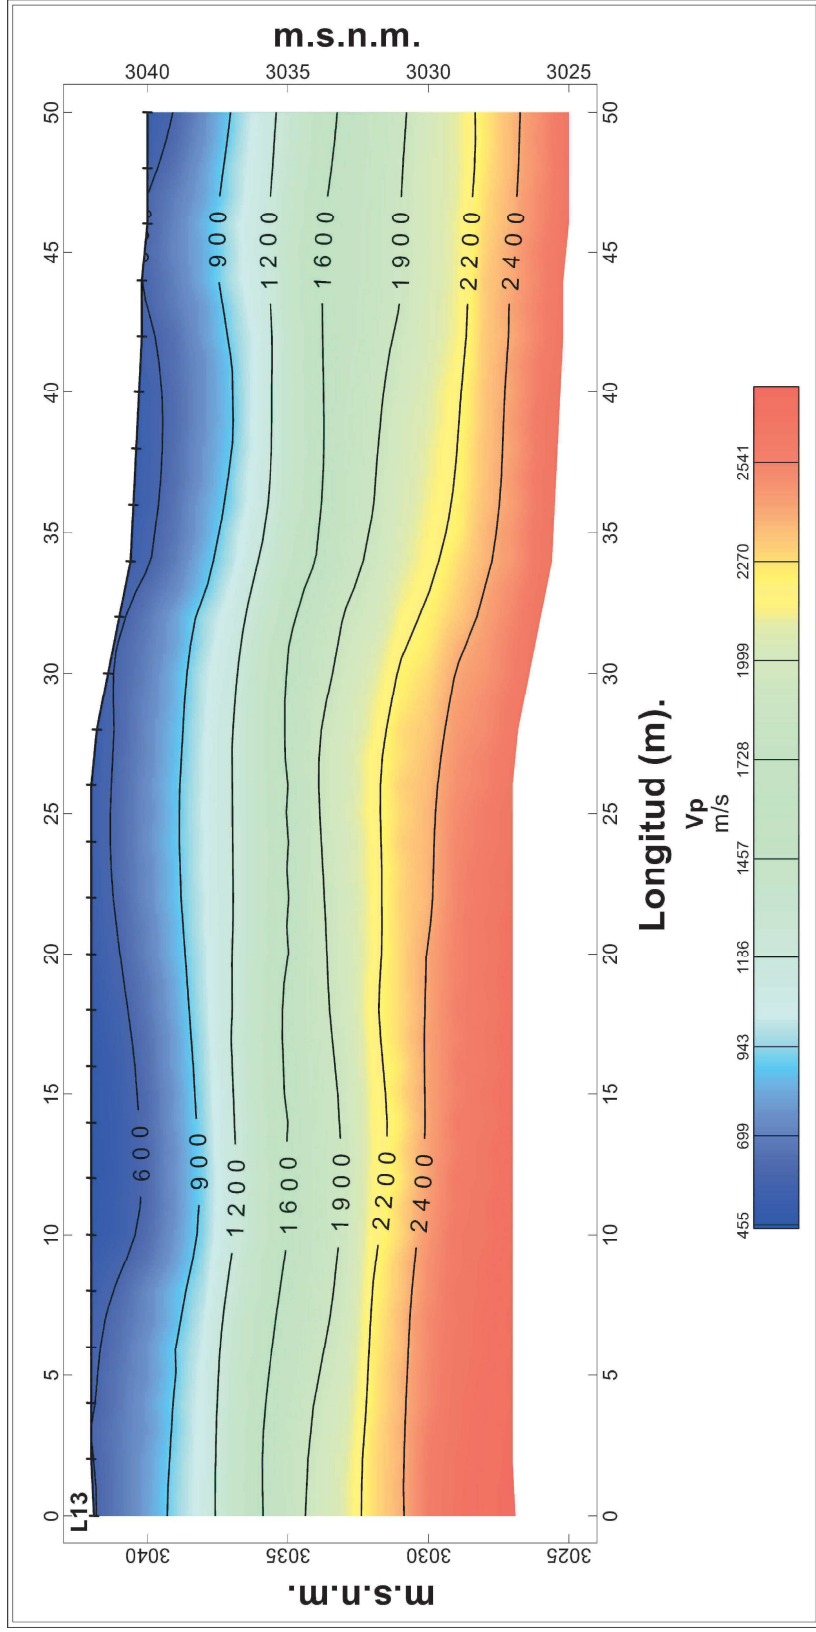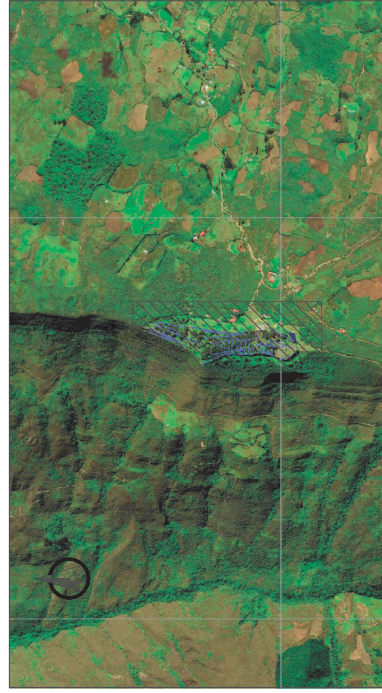

**PLANO DE LOCALIZACIÓN DEL PROYECTO**  
ESCALA: 1/10000

| CONFIDENCIAL                                                                                                                                                                                                                                                                                  | NOTAS:                                                                                                                                                 | DOCUMENTOS DE REFERENCIA |
|-----------------------------------------------------------------------------------------------------------------------------------------------------------------------------------------------------------------------------------------------------------------------------------------------|--------------------------------------------------------------------------------------------------------------------------------------------------------|--------------------------|
| ESTE PLANO Y LA INFORMACION CONTENIDA EN EL MISMO SON CONFIDENCIALES PARA EL CLIENTE. SI ES SIN PREJUDICAR LA AUTORIZACION EN ESTE PLANO, LOS DATOS CONTENIDOS EN ESTE PLANO SERA RESPONSABILIDAD DEL CLIENTE. EL CLIENTE DEBE ASUMIR LA NINGUNA RESPONSABILIDAD LEGAL POR PARTE DEL CLIENTE. | 1. LA INFORMACION TOPOGRAFICA ESTA EN EL SISTEMA<br>2. LA UNIDAD PARA LAS DIMENSIONES ES EN METROS Y<br>3. LAS ESCALAS MOSTRANAN ES PARA EL TORNADO A. | REV.<br>A                |

[illegible]

CLIENTE:


**Ministerio de Cultura**  
 Dirección General de Patrimonio Cultural  
 Calle 13 de Septiembre 13-100, San José, Costa Rica

CONSULTOR:  
Ing. Nilsson Mori Sánchez

CIP 175217

|                                                                                                                                                                                                                 |                                        |
|-----------------------------------------------------------------------------------------------------------------------------------------------------------------------------------------------------------------|----------------------------------------|
| <b>PROYECTO:</b><br><b>CONTRATACIÓN DE SERVICIO PARA LA DETERMINACIÓN DE LA ESTRATIGRAFÍA DEL ÁREA NUCLEAR DE LA ZONA ARQUEOLÓGICA MONUMENTAL DE NUÉLAP</b><br><b>NÚMERO DE CONTRATO: Nº 030-2023-OGA-S6/MC</b> |                                        |
| <b>TÍTULO:</b><br><b>PLANO DE PERFILES SÍSMICOS</b>                                                                                                                                                             |                                        |
| <b>ESCALA:</b>                                                                                                                                                                                                  | <b>PLANO Nº:</b> ESTUDIOS DE GEOFÍSICA |
| <b>FECHA:</b>                                                                                                                                                                                                   | <b>GRÁFICA:</b> LS-13                  |
| <b>REV. A:</b>                                                                                                                                                                                                  |                                        |

| Código | CUADRO DE COORDENADAS |            |           |            |        |          |         |            |            |            |        |          |         |            | Longitud | Latitud    |      |       |
|--------|-----------------------|------------|-----------|------------|--------|----------|---------|------------|------------|------------|--------|----------|---------|------------|----------|------------|------|-------|
|        | Inicio                |            | Fin       |            | Código | Longitud | Inicio  |            | Fin        |            | Código | Longitud | Inicio  |            |          |            | Fin  |       |
|        | Este                  | Norte      | Este      | Norte      |        |          | Este    | Norte      | Este       | Norte      |        |          | Este    | Norte      |          |            | Este | Norte |
| LS-01  | 1764886               | 9289459    | 1764629   | 9289506.11 | 50     | LS-21    | 1765538 | 9289861    | 1765239    | 9289739.34 | 100    | LS-41    | 1765488 | 9289761.00 | 1765348  | 9289881.00 |      |       |
| LS-02  | 1764886               | 9289532.34 | 176497.63 | 9289509.63 | 50     | LS-22    | 1765538 | 9289865    | 1765766.43 | 9289739.35 | 100    | LS-42    | 1765488 | 9289752.00 | 1765348  | 9289887.00 |      |       |
| LS-03  | 1764900               | 9289506.00 | 176495.88 | 9289709.99 | 100    | LS-23    | 1765568 | 9289886    | 176581.55  | 9289788.77 | 100    | LS-43    | 1765318 | 9289756.00 | 1765277  | 9289887.00 |      |       |
| LS-04  | 1764900               | 9289506.00 | 176495.88 | 9289787.42 | 100    | LS-24    | 1765568 | 9289886    | 176581.55  | 9289788.08 | 100    | LS-44    | 1765204 | 9289748.00 | 1765299  | 9289887.00 |      |       |
| LS-05  | 1764888               | 9289760.00 | 176508.23 | 9289662.07 | 100    | LS-25    | 1765755 | 9289855    | 1765564.60 | 9289683.91 | 50     | LS-45    | 1765166 | 9289754.00 | 1765133  | 9289888.00 |      |       |
| LS-06  | 1765044               | 9289636.00 | 1765120   | 9289606.39 | 50     | LS-26    | 1765965 | 9289830    | 176562.01  | 9289679.91 | 50     | LS-46    | 1765372 | 9289870.00 | 1765304  | 9289955.00 |      |       |
| LS-07  | 1765020               | 9289587.47 | 176495.24 | 9289537.46 | 50     | LS-27    | 1765485 | 9289861    | 1765441    | 9289604.87 | 50     | LS-47    | 1765686 | 9289886.00 | 1765699  | 9289967.00 |      |       |
| LS-08  | 1764886               | 9289532.34 | 176535.99 | 9289534.06 | 50     | LS-28    | 1765636 | 9289902    | 1765772.96 | 9289994.92 | 100    | LS-48    | 1765607 | 9289775.00 | 1765634  | 9289870.29 |      |       |
| LS-09  | 1764900               | 9289547.00 | 176540.68 | 9289541.36 | 50     | LS-29    | 1765442 | 9289903    | 1765872.25 | 9289992.18 | 100    | LS-49    | 1765500 | 9289797.00 | 1765577  | 9289868.00 |      |       |
| LS-10  | 1764904               | 9289565.00 | 176541.74 | 9289550.48 | 50     | LS-30    | 1765448 | 9289897    | 1765801.89 | 9289991.44 | 100    | LS-50    | 1765544 | 9289769.00 | 1765579  | 9289842.00 |      |       |
| LS-11  | 1764955               | 9289530.00 | 176540.68 | 9289574.15 | 50     | LS-31    | 1765155 | 9289861    | 1765711.53 | 9289964.09 | 100    | LS-51    | 1765331 | 9289756.00 | 1765655  | 9289864.00 |      |       |
| LS-12  | 1765210               | 9289591.00 | 176520.67 | 9289684.19 | 50     | LS-32    | 1765635 | 9289865    | 1765599.83 | 9289961.83 | 100    | LS-52    | 1765333 | 9289760.00 | 1765303  | 9289830.00 |      |       |
| LS-13  | 1764988               | 9289602.00 | 176547.96 | 9289604.04 | 50     | LS-33    | 1765660 | 9289875    | 1765595.47 | 9289966.94 | 100    | LS-53    | 1765885 | 9289597.00 | 1765492  | 9289658.00 |      |       |
| LS-14  | 1764980               | 9289621.00 | 176538.89 | 9289617.75 | 50     | LS-34    | 1765755 | 9289881    | 176607.27  | 9289975.65 | 100    | LS-54    | 1765919 | 9289586.00 | 1765512  | 9289683.00 |      |       |
| LS-15  | 1764900               | 9289636.00 | 176539.29 | 9289629.61 | 50     | LS-35    | 1766100 | 9289855    | 176589.96  | 9289875.03 | 100    | LS-55    | 1766483 | 9289519.00 | 1765306  | 9289594.00 |      |       |
| LS-16  | 1764920               | 9289653.00 | 176541.75 | 9289648.03 | 50     | LS-36    | 1765100 | 9289842    | 176546.40  | 9289544.00 | 100    | LS-56    | 1766564 | 9289512.00 | 1765620  | 9289584.00 |      |       |
| LS-17  | 1764900               | 9289669.00 | 176546.37 | 9289661.20 | 50     | LS-37    | 1765835 | 9289845    | 176584.51  | 9289581.04 | 100    | LS-57    | 1766564 | 9289600.00 | 1765620  | 9289559.00 |      |       |
| LS-18  | 1764900               | 9289685.00 | 176544.92 | 9289686.63 | 50     | LS-38    | 1765177 | 9289848    | 176624.20  | 9289584.74 | 100    | LS-58    | 1766493 | 9289470.00 | 1765606  | 9289573.00 |      |       |
| LS-19  | 1764900               | 9289705.00 | 176546.81 | 9289697.33 | 50     | LS-39    | 1765277 | 9289803    | 176568.16  | 9289886.14 | 100    | LS-59    | 1766487 | 9289487.00 | 1766495  | 9289572.00 |      |       |
| LS-20  | 1765102               | 9289705.00 | 176530.40 | 9289751.49 | 50     | LS-40    | 1765733 | 9289738.00 | 176591.62  | 9289836.25 | 100    | LS-60    | 1765331 | 9289490.00 | 1766495  | 9289584.00 |      |       |

















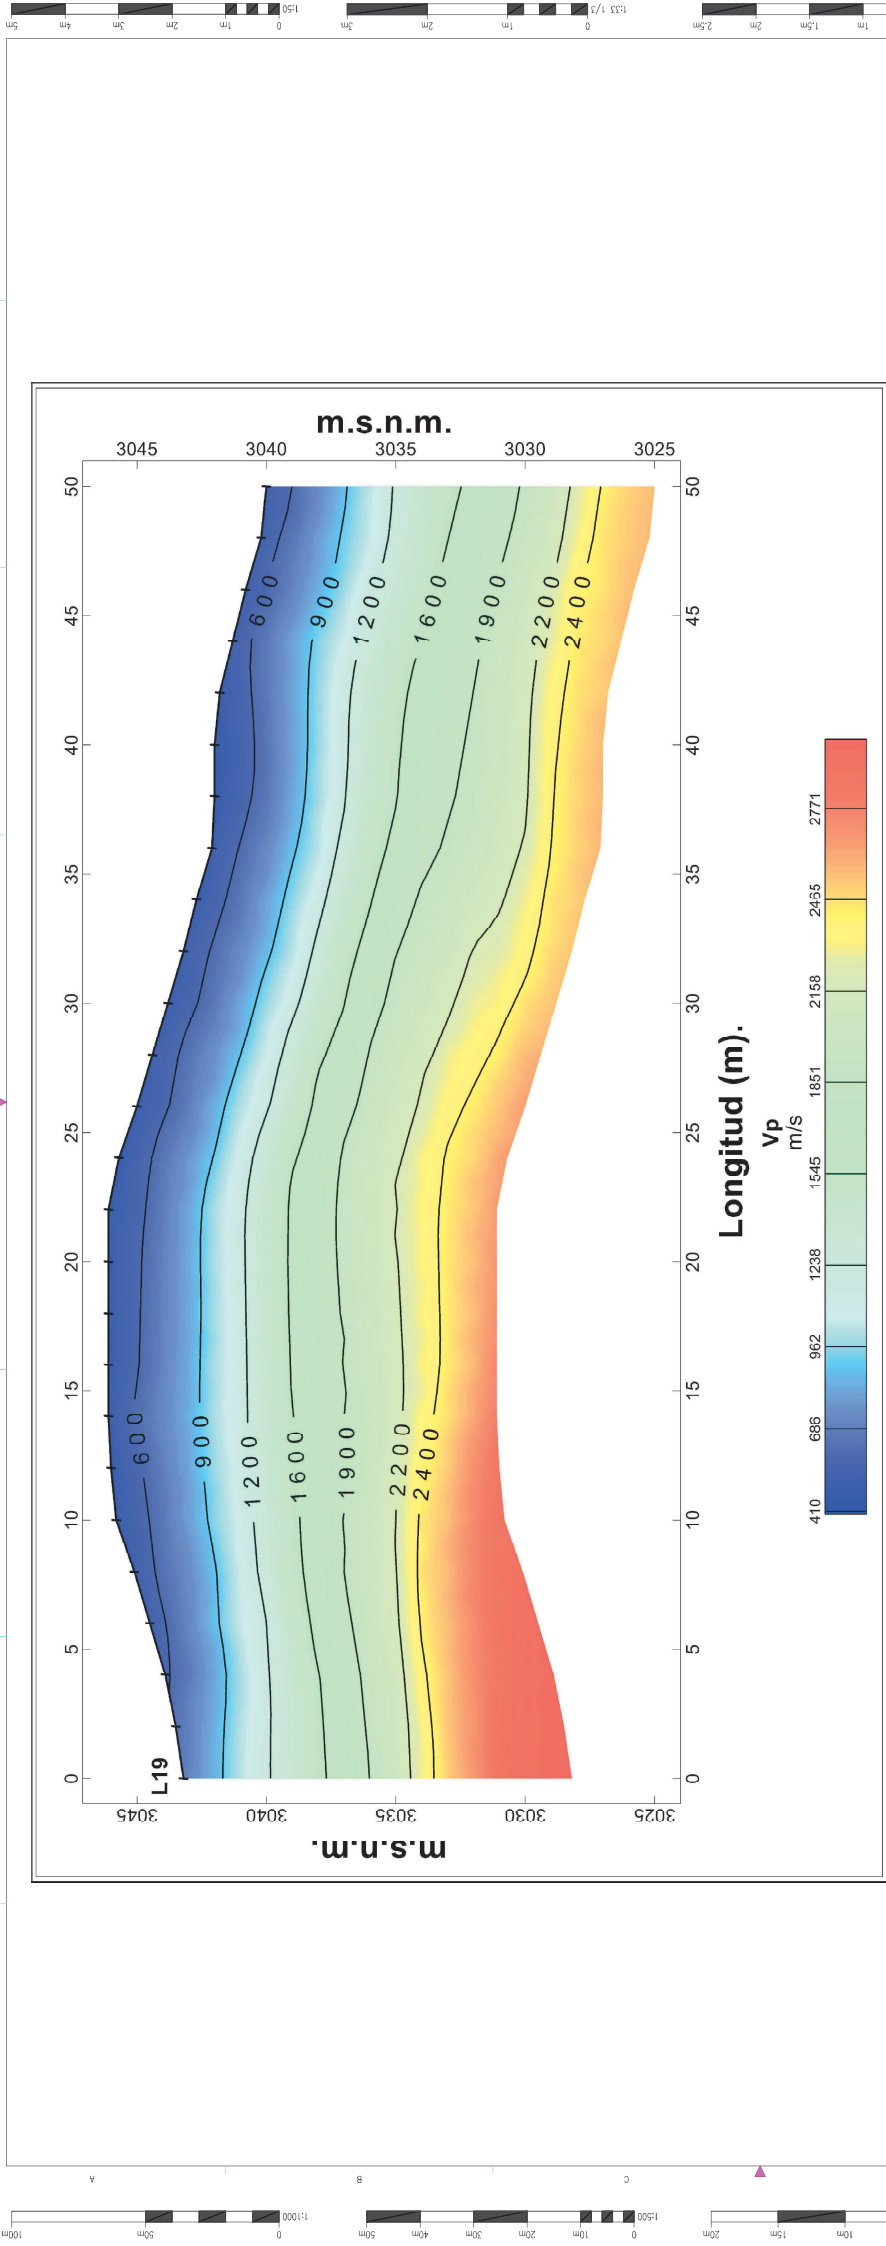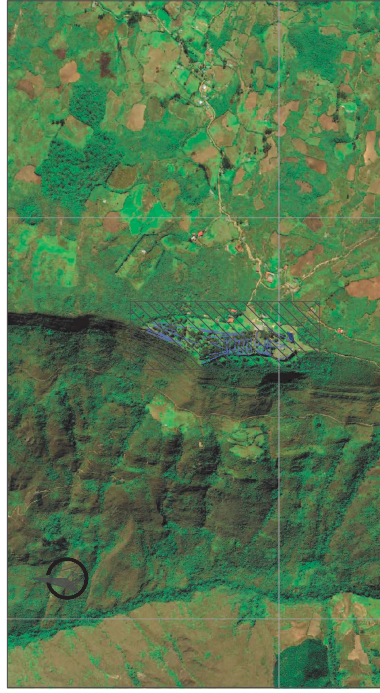

PLANO DE LOCALIZACIÓN DEL PROYECTO

| Código | Inicio  |         |         |            | Fin  |       |         |         | Longitud | Código     | CUADRO DE COORDENADAS |       |         |         |         |            |         |            | Longitud | Código     | Inicio  |            |         |            | Fin     |            |         |            | Longitud | Código     | Inicio  |            |         |            | Fin     |            |         |            | Longitud |            |         |            |         |            |         |            |         |            |         |            |         |            |         |            |         |            |         |            |         |            |         |            |         |            |         |            |         |            |         |            |         |            |         |            |         |            |         |            |         |            |         |            |         |            |         |            |         |            |         |            |         |            |         |            |         |            |         |            |         |            |         |            |         |            |         |            |         |            |         |            |         |            |         |            |         |            |         |            |         |            |         |            |         |            |         |            |         |            |         |            |         |            |         |            |         |            |         |            |         |            |         |            |         |            |         |            |         |            |         |            |         |            |         |            |         |            |         |            |         |            |         |            |         |            |         |            |         |            |         |            |         |            |         |            |         |            |         |            |         |            |         |            |         |            |         |            |         |            |         |            |         |            |         |            |         |            |         |            |         |            |         |            |         |            |         |            |         |            |         |            |         |            |         |            |         |            |         |            |         |            |         |            |         |            |         |            |         |            |         |            |         |            |         |            |         |            |         |            |         |            |         |            |         |            |         |            |         |            |         |            |         |            |         |            |         |            |         |            |         |            |         |            |         |            |         |            |         |            |         |            |         |            |         |            |         |            |         |            |         |            |         |            |         |            |         |            |         |            |         |            |         |            |         |            |         |            |         |            |         |            |         |            |         |            |         |            |         |            |         |            |         |            |         |            |         |            |         |            |         |            |         |            |         |            |         |            |         |            |         |            |         |            |         |            |         |            |         |            |         |            |         |            |         |            |         |            |         |            |         |            |         |            |         |            |         |            |         |            |         |            |         |            |         |            |         |            |         |            |         |            |         |            |         |            |         |            |         |            |         |            |         |            |         |            |         |            |         |            |         |            |         |            |         |            |         |            |         |            |         |            |         |            |         |            |         |            |         |            |         |            |         |            |         |            |         |            |         |            |         |            |         |            |         |            |         |            |         |            |         |            |         |            |         |            |         |            |         |            |         |            |         |            |         |            |         |            |         |            |         |            |         |            |         |            |         |            |         |            |         |            |         |            |         |            |         |            |         |            |         |            |         |            |         |            |         |            |         |            |         |            |         |            |         |            |         |            |         |            |         |            |         |            |         |            |         |            |         |            |         |            |         |            |         |            |         |            |         |            |         |            |         |            |         |            |         |            |         |            |         |            |         |            |         |            |         |            |         |            |         |            |         |            |         |            |         |            |         |            |         |            |         |            |         |            |         |            |         |            |         |            |         |            |         |            |         |            |         |            |         |            |         |            |         |            |         |            |         |            |         |            |         |            |         |            |         |            |         |            |         |            |         |            |         |            |         |            |         |            |         |            |         |            |         |            |         |            |         |            |         |            |         |            |         |            |         |            |         |            |         |            |         |            |         |            |         |            |         |            |         |            |         |            |         |            |         |            |         |            |         |            |         |            |         |            |         |            |         |            |         |            |         |            |         |            |         |            |         |            |         |            |         |            |         |            |         |            |         |            |         |            |         |            |         |            |         |            |         |            |         |            |         |            |         |            |         |            |         |            |         |            |      |
|--------|---------|---------|---------|------------|------|-------|---------|---------|----------|------------|-----------------------|-------|---------|---------|---------|------------|---------|------------|----------|------------|---------|------------|---------|------------|---------|------------|---------|------------|----------|------------|---------|------------|---------|------------|---------|------------|---------|------------|----------|------------|---------|------------|---------|------------|---------|------------|---------|------------|---------|------------|---------|------------|---------|------------|---------|------------|---------|------------|---------|------------|---------|------------|---------|------------|---------|------------|---------|------------|---------|------------|---------|------------|---------|------------|---------|------------|---------|------------|---------|------------|---------|------------|---------|------------|---------|------------|---------|------------|---------|------------|---------|------------|---------|------------|---------|------------|---------|------------|---------|------------|---------|------------|---------|------------|---------|------------|---------|------------|---------|------------|---------|------------|---------|------------|---------|------------|---------|------------|---------|------------|---------|------------|---------|------------|---------|------------|---------|------------|---------|------------|---------|------------|---------|------------|---------|------------|---------|------------|---------|------------|---------|------------|---------|------------|---------|------------|---------|------------|---------|------------|---------|------------|---------|------------|---------|------------|---------|------------|---------|------------|---------|------------|---------|------------|---------|------------|---------|------------|---------|------------|---------|------------|---------|------------|---------|------------|---------|------------|---------|------------|---------|------------|---------|------------|---------|------------|---------|------------|---------|------------|---------|------------|---------|------------|---------|------------|---------|------------|---------|------------|---------|------------|---------|------------|---------|------------|---------|------------|---------|------------|---------|------------|---------|------------|---------|------------|---------|------------|---------|------------|---------|------------|---------|------------|---------|------------|---------|------------|---------|------------|---------|------------|---------|------------|---------|------------|---------|------------|---------|------------|---------|------------|---------|------------|---------|------------|---------|------------|---------|------------|---------|------------|---------|------------|---------|------------|---------|------------|---------|------------|---------|------------|---------|------------|---------|------------|---------|------------|---------|------------|---------|------------|---------|------------|---------|------------|---------|------------|---------|------------|---------|------------|---------|------------|---------|------------|---------|------------|---------|------------|---------|------------|---------|------------|---------|------------|---------|------------|---------|------------|---------|------------|---------|------------|---------|------------|---------|------------|---------|------------|---------|------------|---------|------------|---------|------------|---------|------------|---------|------------|---------|------------|---------|------------|---------|------------|---------|------------|---------|------------|---------|------------|---------|------------|---------|------------|---------|------------|---------|------------|---------|------------|---------|------------|---------|------------|---------|------------|---------|------------|---------|------------|---------|------------|---------|------------|---------|------------|---------|------------|---------|------------|---------|------------|---------|------------|---------|------------|---------|------------|---------|------------|---------|------------|---------|------------|---------|------------|---------|------------|---------|------------|---------|------------|---------|------------|---------|------------|---------|------------|---------|------------|---------|------------|---------|------------|---------|------------|---------|------------|---------|------------|---------|------------|---------|------------|---------|------------|---------|------------|---------|------------|---------|------------|---------|------------|---------|------------|---------|------------|---------|------------|---------|------------|---------|------------|---------|------------|---------|------------|---------|------------|---------|------------|---------|------------|---------|------------|---------|------------|---------|------------|---------|------------|---------|------------|---------|------------|---------|------------|---------|------------|---------|------------|---------|------------|---------|------------|---------|------------|---------|------------|---------|------------|---------|------------|---------|------------|---------|------------|---------|------------|---------|------------|---------|------------|---------|------------|---------|------------|---------|------------|---------|------------|---------|------------|---------|------------|---------|------------|---------|------------|---------|------------|---------|------------|---------|------------|---------|------------|---------|------------|---------|------------|---------|------------|---------|------------|---------|------------|---------|------------|---------|------------|---------|------------|---------|------------|---------|------------|---------|------------|---------|------------|---------|------------|---------|------------|---------|------------|---------|------------|---------|------------|---------|------------|---------|------------|---------|------------|---------|------------|---------|------------|---------|------------|---------|------------|---------|------------|---------|------------|---------|------------|---------|------------|---------|------------|---------|------------|---------|------------|---------|------------|---------|------------|---------|------------|---------|------------|---------|------------|---------|------------|---------|------------|---------|------------|---------|------------|---------|------------|---------|------------|---------|------------|---------|------------|---------|------------|---------|------------|---------|------------|---------|------------|---------|------------|---------|------------|---------|------------|---------|------------|---------|------------|---------|------------|---------|------------|---------|------------|---------|------------|---------|------------|---------|------------|---------|------------|---------|------------|---------|------------|---------|------------|---------|------------|---------|------------|---------|------------|---------|------------|---------|------------|---------|------------|---------|------------|---------|------------|---------|------------|---------|------------|---------|------------|---------|------------|---------|------------|---------|------------|---------|------------|---------|------------|---------|------------|---------|------------|---------|------------|---------|------------|---------|------------|---------|------------|---------|------------|---------|------------|---------|------------|---------|------------|---------|------------|------|
|        | Este    | Norte   | Este    | Norte      | Este | Norte | Este    | Norte   |          |            | Este                  | Norte | Este    | Norte   | Este    | Norte      | Este    | Norte      |          |            | Este    | Norte      | Este    | Norte      | Este    | Norte      | Este    | Norte      |          |            | Este    | Norte      | Este    | Norte      | Este    | Norte      |         |            |          |            |         |            |         |            |         |            |         |            |         |            |         |            |         |            |         |            |         |            |         |            |         |            |         |            |         |            |         |            |         |            |         |            |         |            |         |            |         |            |         |            |         |            |         |            |         |            |         |            |         |            |         |            |         |            |         |            |         |            |         |            |         |            |         |            |         |            |         |            |         |            |         |            |         |            |         |            |         |            |         |            |         |            |         |            |         |            |         |            |         |            |         |            |         |            |         |            |         |            |         |            |         |            |         |            |         |            |         |            |         |            |         |            |         |            |         |            |         |            |         |            |         |            |         |            |         |            |         |            |         |            |         |            |         |            |         |            |         |            |         |            |         |            |         |            |         |            |         |            |         |            |         |            |         |            |         |            |         |            |         |            |         |            |         |            |         |            |         |            |         |            |         |            |         |            |         |            |         |            |         |            |         |            |         |            |         |            |         |            |         |            |         |            |         |            |         |            |         |            |         |            |         |            |         |            |         |            |         |            |         |            |         |            |         |            |         |            |         |            |         |            |         |            |         |            |         |            |         |            |         |            |         |            |         |            |         |            |         |            |         |            |         |            |         |            |         |            |         |            |         |            |         |            |         |            |         |            |         |            |         |            |         |            |         |            |         |            |         |            |         |            |         |            |         |            |         |            |         |            |         |            |         |            |         |            |         |            |         |            |         |            |         |            |         |            |         |            |         |            |         |            |         |            |         |            |         |            |         |            |         |            |         |            |         |            |         |            |         |            |         |            |         |            |         |            |         |            |         |            |         |            |         |            |         |            |         |            |         |            |         |            |         |            |         |            |         |            |         |            |         |            |         |            |         |            |         |            |         |            |         |            |         |            |         |            |         |            |         |            |         |            |         |            |         |            |         |            |         |            |         |            |         |            |         |            |         |            |         |            |         |            |         |            |         |            |         |            |         |            |         |            |         |            |         |            |         |            |         |            |         |            |         |            |         |            |         |            |         |            |         |            |         |            |         |            |         |            |         |            |         |            |         |            |         |            |         |            |         |            |         |            |         |            |         |            |         |            |         |            |         |            |         |            |         |            |         |            |         |            |         |            |         |            |         |            |         |            |         |            |         |            |         |            |         |            |         |            |         |            |         |            |         |            |         |            |         |            |         |            |         |            |         |            |         |            |         |            |         |            |         |            |         |            |         |            |         |            |         |            |         |            |         |            |         |            |         |            |         |            |         |            |         |            |         |            |         |            |         |            |         |            |         |            |         |            |         |            |         |            |         |            |         |            |         |            |         |            |         |            |         |            |         |            |         |            |         |            |         |            |         |            |         |            |         |            |         |            |         |            |         |            |         |            |         |            |         |            |         |            |         |            |         |            |         |            |         |            |         |            |         |            |         |            |         |            |         |            |         |            |         |            |         |            |         |            |         |            |         |            |         |            |         |            |         |            |         |            |         |            |         |            |         |            |         |            |         |            |         |            |         |            |         |            |         |            |         |            |         |            |         |            |      |
| LS-01  | 1764800 | 9289450 | 1764693 | 9289505.11 | 50   | LS-21 | 1765400 | 9289861 | 1765293  | 9289793.34 | 100                   | LS-41 | 1767400 | 9289761 | 1765140 | 9289751.00 | 1765140 | 9289751.00 | 1765140  | 9289751.00 | 1765140 | 9289751.00 | 1765140 | 9289751.00 | 1765140 | 9289751.00 | 1765140 | 9289751.00 | 1765140  | 9289751.00 | 1765140 | 9289751.00 | 1765140 | 9289751.00 | 1765140 | 9289751.00 | 1765140 | 9289751.00 | 1765140  | 9289751.00 | 1765140 | 9289751.00 | 1765140 | 9289751.00 | 1765140 | 9289751.00 | 1765140 | 9289751.00 | 1765140 | 9289751.00 | 1765140 | 9289751.00 | 1765140 | 9289751.00 | 1765140 | 9289751.00 | 1765140 | 9289751.00 | 1765140 | 9289751.00 | 1765140 | 9289751.00 | 1765140 | 9289751.00 | 1765140 | 9289751.00 | 1765140 | 9289751.00 | 1765140 | 9289751.00 | 1765140 | 9289751.00 | 1765140 | 9289751.00 | 1765140 | 9289751.00 | 1765140 | 9289751.00 | 1765140 | 9289751.00 | 1765140 | 9289751.00 | 1765140 | 9289751.00 | 1765140 | 9289751.00 | 1765140 | 9289751.00 | 1765140 | 9289751.00 | 1765140 | 9289751.00 | 1765140 | 9289751.00 | 1765140 | 9289751.00 | 1765140 | 9289751.00 | 1765140 | 9289751.00 | 1765140 | 9289751.00 | 1765140 | 9289751.00 | 1765140 | 9289751.00 | 1765140 | 9289751.00 | 1765140 | 9289751.00 | 1765140 | 9289751.00 | 1765140 | 9289751.00 | 1765140 | 9289751.00 | 1765140 | 9289751.00 | 1765140 | 9289751.00 | 1765140 | 9289751.00 | 1765140 | 9289751.00 | 1765140 | 9289751.00 | 1765140 | 9289751.00 | 1765140 | 9289751.00 | 1765140 | 9289751.00 | 1765140 | 9289751.00 | 1765140 | 9289751.00 | 1765140 | 9289751.00 | 1765140 | 9289751.00 | 1765140 | 9289751.00 | 1765140 | 9289751.00 | 1765140 | 9289751.00 | 1765140 | 9289751.00 | 1765140 | 9289751.00 | 1765140 | 9289751.00 | 1765140 | 9289751.00 | 1765140 | 9289751.00 | 1765140 | 9289751.00 | 1765140 | 9289751.00 | 1765140 | 9289751.00 | 1765140 | 9289751.00 | 1765140 | 9289751.00 | 1765140 | 9289751.00 | 1765140 | 9289751.00 | 1765140 | 9289751.00 | 1765140 | 9289751.00 | 1765140 | 9289751.00 | 1765140 | 9289751.00 | 1765140 | 9289751.00 | 1765140 | 9289751.00 | 1765140 | 9289751.00 | 1765140 | 9289751.00 | 1765140 | 9289751.00 | 1765140 | 9289751.00 | 1765140 | 9289751.00 | 1765140 | 9289751.00 | 1765140 | 9289751.00 | 1765140 | 9289751.00 | 1765140 | 9289751.00 | 1765140 | 9289751.00 | 1765140 | 9289751.00 | 1765140 | 9289751.00 | 1765140 | 9289751.00 | 1765140 | 9289751.00 | 1765140 | 9289751.00 | 1765140 | 9289751.00 | 1765140 | 9289751.00 | 1765140 | 9289751.00 | 1765140 | 9289751.00 | 1765140 | 9289751.00 | 1765140 | 9289751.00 | 1765140 | 9289751.00 | 1765140 | 9289751.00 | 1765140 | 9289751.00 | 1765140 | 9289751.00 | 1765140 | 9289751.00 | 1765140 | 9289751.00 | 1765140 | 9289751.00 | 1765140 | 9289751.00 | 1765140 | 9289751.00 | 1765140 | 9289751.00 | 1765140 | 9289751.00 | 1765140 | 9289751.00 | 1765140 | 9289751.00 | 1765140 | 9289751.00 | 1765140 | 9289751.00 | 1765140 | 9289751.00 | 1765140 | 9289751.00 | 1765140 | 9289751.00 | 1765140 | 9289751.00 | 1765140 | 9289751.00 | 1765140 | 9289751.00 | 1765140 | 9289751.00 | 1765140 | 9289751.00 | 1765140 | 9289751.00 | 1765140 | 9289751.00 | 1765140 | 9289751.00 | 1765140 | 9289751.00 | 1765140 | 9289751.00 | 1765140 | 9289751.00 | 1765140 | 9289751.00 | 1765140 | 9289751.00 | 1765140 | 9289751.00 | 1765140 | 9289751.00 | 1765140 | 9289751.00 | 1765140 | 9289751.00 | 1765140 | 9289751.00 | 1765140 | 9289751.00 | 1765140 | 9289751.00 | 1765140 | 9289751.00 | 1765140 | 9289751.00 | 1765140 | 9289751.00 | 1765140 | 9289751.00 | 1765140 | 9289751.00 | 1765140 | 9289751.00 | 1765140 | 9289751.00 | 1765140 | 9289751.00 | 1765140 | 9289751.00 | 1765140 | 9289751.00 | 1765140 | 9289751.00 | 1765140 | 9289751.00 | 1765140 | 9289751.00 | 1765140 | 9289751.00 | 1765140 | 9289751.00 | 1765140 | 9289751.00 | 1765140 | 9289751.00 | 1765140 | 9289751.00 | 1765140 | 9289751.00 | 1765140 | 9289751.00 | 1765140 | 9289751.00 | 1765140 | 9289751.00 | 1765140 | 9289751.00 | 1765140 | 9289751.00 | 1765140 | 9289751.00 | 1765140 | 9289751.00 | 1765140 | 9289751.00 | 1765140 | 9289751.00 | 1765140 | 9289751.00 | 1765140 | 9289751.00 | 1765140 | 9289751.00 | 1765140 | 9289751.00 | 1765140 | 9289751.00 | 1765140 | 9289751.00 | 1765140 | 9289751.00 | 1765140 | 9289751.00 | 1765140 | 9289751.00 | 1765140 | 9289751.00 | 1765140 | 9289751.00 | 1765140 | 9289751.00 | 1765140 | 9289751.00 | 1765140 | 9289751.00 | 1765140 | 9289751.00 | 1765140 | 9289751.00 | 1765140 | 9289751.00 | 1765140 | 9289751.00 | 1765140 | 9289751.00 | 1765140 | 9289751.00 | 1765140 | 9289751.00 | 1765140 | 9289751.00 | 1765140 | 9289751.00 | 1765140 | 9289751.00 | 1765140 | 9289751.00 | 1765140 | 9289751.00 | 1765140 | 9289751.00 | 1765140 | 9289751.00 | 1765140 | 9289751.00 | 1765140 | 9289751.00 | 1765140 | 9289751.00 | 1765140 | 9289751.00 | 1765140 | 9289751.00 | 1765140 | 9289751.00 | 1765140 | 9289751.00 | 1765140 | 9289751.00 | 1765140 | 9289751.00 | 1765140 | 9289751.00 | 1765140 | 9289751.00 | 1765140 | 9289751.00 | 1765140 | 9289751.00 | 1765140 | 9289751.00 | 1765140 | 9289751.00 | 1765140 | 9289751.00 | 1765140 | 9289751.00 | 1765140 | 9289751.00 | 1765140 | 9289751.00 | 1765140 | 9289751.00 | 1765140 | 9289751.00 | 1765140 | 9289751.00 | 1765140 | 9289751.00 | 1765140 | 9289751.00 | 1765140 | 9289751.00 | 1765140 | 9289751.00 | 1765140 | 9289751.00 | 1765140 | 9289751.00 | 1765140 | 9289751.00 | 1765140 | 9289751.00 | 1765140 | 9289751.00 | 1765140 | 9289751.00 | 1765140 | 9289751.00 | 1765140 | 9289751.00 | 1765140 | 9289751.00 | 1765140 | 9289751.00 | 1765140 | 9289751.00 | 1765140 | 9289751.00 | 1765140 | 9289751.00 | 1765140 | 9289751.00 | 1765140 | 9289751.00 | 1765140 | 9289751.00 | 1765140 | 9289751.00 | 1765140 | 9289751.00 | 1765140 | 9289751.00 | 1765140 | 9289751.00 | 1765140 | 9289751.00 | 1765140 | 9289751.00 | 1765140 | 9289751.00 | 1765140 | 9289751.00 | 1765140 | 9289751.00 | 1765140 | 9289751.00 | 1765140 | 9289751.00 | 1765140 | 9289751.00 | 1765140 | 9289751.00 | 1765140 | 9289751.00 | 1765140 | 9289751.00 | 1765140 | 9289751.00 | 1765140 | 9289751.00 | 1765140 | 9289751.00 | 1765140 | 9289751.00 | 1765140 | 9289751.00 | 1765140 | 9289751.00 | 1765140 | 9289751.00 | 1765140 | 9289751.00 | 1765140 | 9289751.00 | 1765140 | 9289751.00 | 1765140 | 9289751.00 | 1765140 | 9289751.00 | 1765140 | 9289751.00 | 1765140 | 9289751.00 | 1765140 | 9289751.00 | 1765140 | 9289751.00 | 1765140 | 9289751.00 | 1765140 | 9289751.00 | 1765140 | 9289751.00 | 1765140 | 9289751.00 | 1765140 | 9289751.00 | 1765140 | 9289751.00 | 1765140 | 9289751.00 | 1765140 | 9289751.00 | 1765140 | 9289751.00 | 1765140 | 9289751.00 | 1765140 | 9289751.00 | 1765140 | 9289751.00 | 1765140 | 9289751.00 | 1765140 | 9289751.00 | 1765140 | 9289751.00 | 1765140 | 9289751.00 | 1765140 | 9289751.00 | 1765140 | 9289751.00 | 1765140 | 9289751.00 | 1765140 | 9289751.00 | 1765140 | 9289751.00 | 1765140 | 9289751.00 | 1765140 | 9289751.00 | 1765140 | 9289751.00 | 1765140 | 9289751.00 | 1765140 | 9289751.00 | 1765140 | 9289751.00 | 1765140 | 9289751.00 | 1765140 | 9289751.00 | 1765140 | 9289751.00 | 1765140 | 9289751.00 | 1765140 | 9289751.00 | 1765140 | 9289751.00 | 1765140 | 9289751.00 | 1765140 | 9289751.00 | 1765140 | 9289751.00 | 1765140 | 9289751.00 | 1765140 | 9289751.00 | 1765140 | 9289751.00 | 1765140 | 9289751.00 | 1765140 | 9289751.00 | 1765140 | 9289751.00 | 1765140 | 9289751.00 | 1765140 | 9289751.00 | 1765140 | 9289751.00 | 1765140 | 9289751.00 | 1765140 | 9289751.00 | 1765140 | 9289751.00 | 1765140 | 9289751.00 | 1765140 | 9289751.00 | 1765140 | 9289751.00 | 1765140 | 9289751.00 | 1765140 | 9289751.00 | 1765140 | 9289751.00 | 1765140 | 9289751.00 | 1765140 | 9289751.00 | 1765140 | 9289751.00 | 1765140 | 9289751.00 | 1765140 | 9289751.00 | 1765140 | 9289751.00 | 1765140 | 9289751.00 | 1765 |

[illegible]



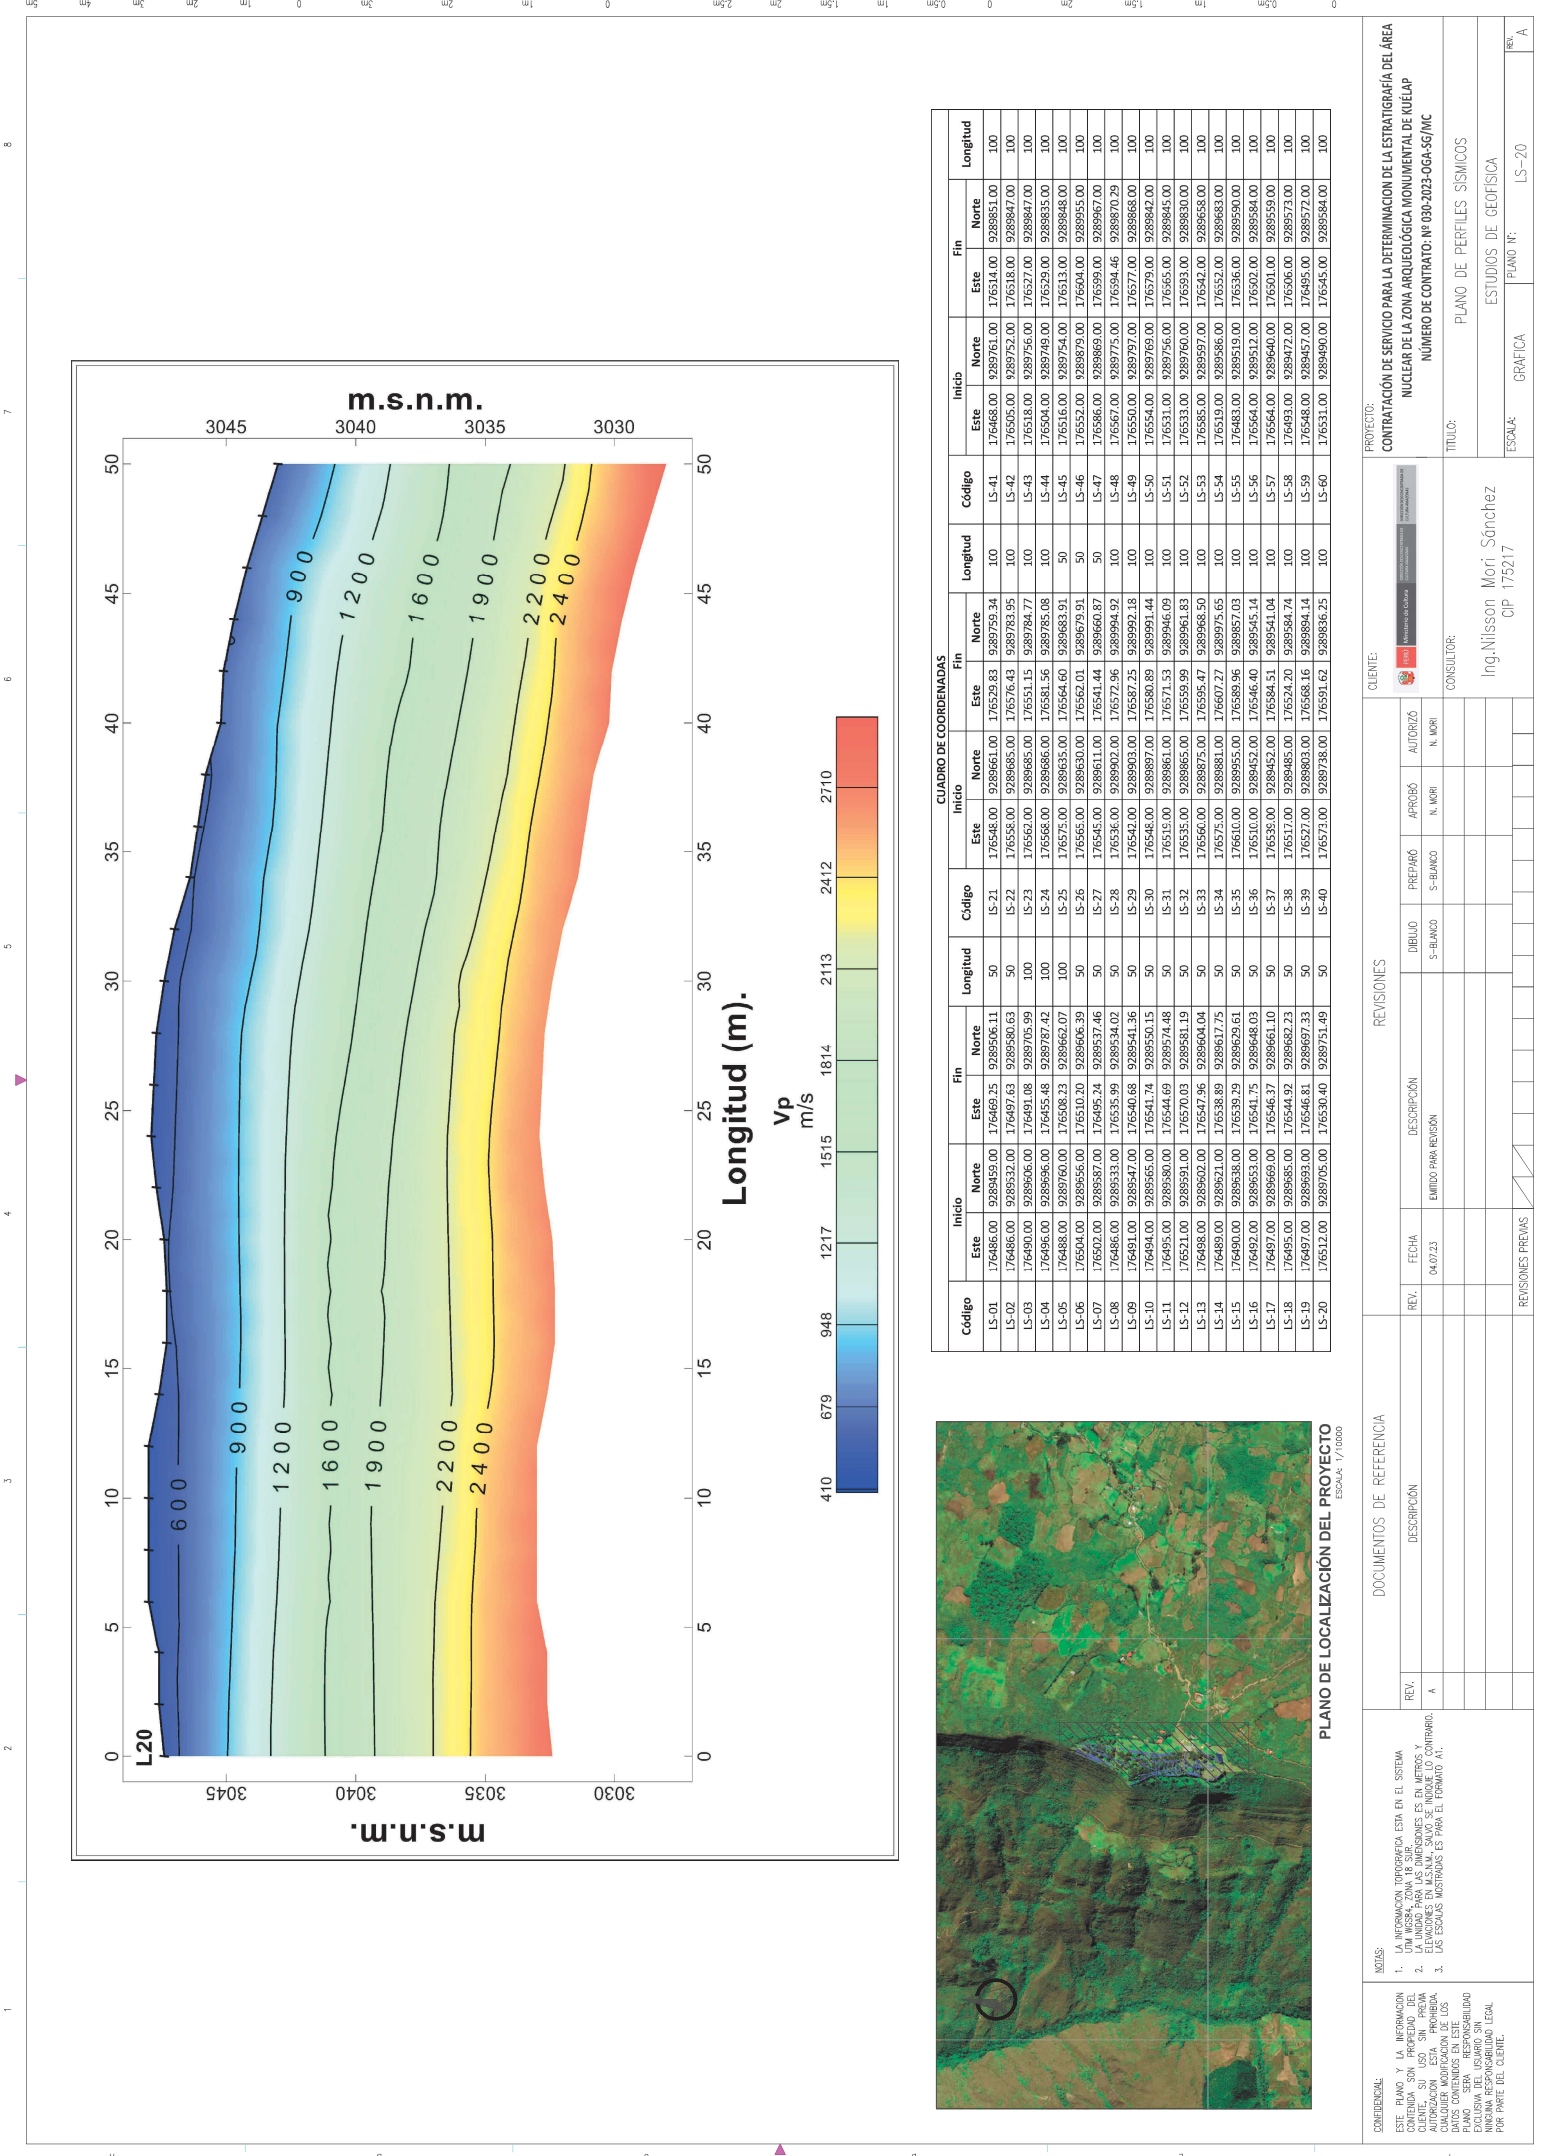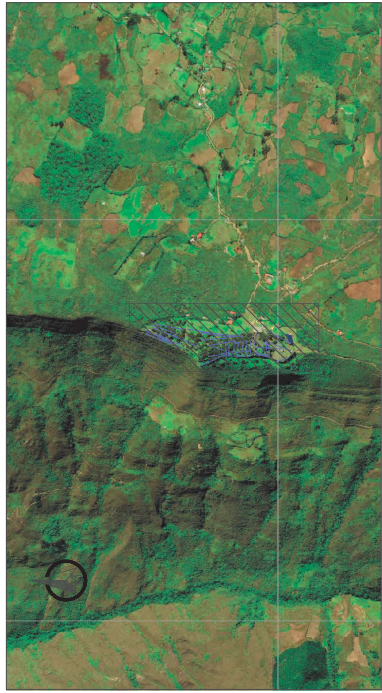

PLANO DE LOCALIZACIÓN DEL PROYECTO  
ESCALA 1/10000

|                                                                                                                                                                                                                                                                                                    |       |                          |          |                       |          |            |         |          |                                                                                     |                                                                                                                                                                               |  |  |  |           |  |  |  |  |  |  |  |  |  |  |  |  |  |  |  |  |  |  |  |  |  |  |  |  |  |  |  |  |  |  |  |  |  |  |  |  |  |  |  |  |  |  |  |  |  |  |  |  |  |  |  |  |  |  |  |  |  |  |  |  |  |  |  |  |  |  |  |  |  |  |  |  |  |  |  |  |  |  |  |  |  |  |  |  |  |  |  |  |  |  |  |  |  |  |  |  |  |  |  |  |  |  |  |  |  |  |  |  |  |  |  |  |  |  |  |  |  |  |  |  |  |  |  |  |  |  |  |  |  |  |  |  |  |  |  |  |  |  |  |  |  |  |  |  |  |  |  |  |  |  |  |  |  |  |  |  |  |  |  |  |  |  |  |  |  |  |  |  |  |  |  |  |  |  |  |  |  |  |  |  |  |  |  |  |  |  |  |  |  |  |  |  |  |  |  |  |  |  |  |  |  |  |  |  |  |  |  |  |  |  |  |  |  |  |  |  |  |  |  |  |  |  |  |  |  |  |  |  |  |  |  |  |  |  |  |  |  |  |  |  |  |  |  |  |  |  |  |  |  |  |  |  |  |  |  |  |  |  |  |  |  |  |  |  |  |  |  |  |  |  |  |  |  |  |  |  |  |  |  |  |  |  |  |  |  |  |  |  |  |  |  |  |  |  |  |  |  |  |  |  |  |  |  |  |  |  |  |  |  |  |  |  |  |  |  |  |  |  |  |  |  |  |  |  |  |  |  |  |  |  |  |  |  |  |  |  |  |  |  |  |  |  |  |  |  |  |  |  |  |  |  |  |  |  |  |  |  |  |  |  |  |  |  |  |  |  |  |  |  |  |  |  |  |  |  |  |  |  |  |  |  |  |  |  |  |  |  |  |  |  |  |  |  |  |  |  |  |  |  |  |  |  |  |  |  |  |  |  |  |  |  |  |  |  |  |  |  |  |  |  |  |  |  |  |  |  |  |  |  |  |  |  |  |  |  |  |  |  |  |  |  |  |  |  |  |  |  |  |  |  |  |  |  |  |  |  |  |  |  |  |  |  |  |  |  |  |  |  |  |  |  |  |  |  |  |  |  |  |  |  |  |  |  |  |  |  |  |  |  |  |  |  |  |  |  |  |  |  |  |  |  |  |  |  |  |  |  |  |  |  |  |  |  |  |  |  |  |  |  |  |  |  |  |  |  |  |  |  |  |  |  |  |  |  |  |  |  |  |  |  |  |  |  |  |  |  |  |  |  |  |  |  |  |  |  |  |  |  |  |  |  |  |  |  |  |  |  |  |  |  |  |  |  |  |  |  |  |  |  |  |  |  |  |  |  |  |  |  |  |  |  |  |  |  |  |  |  |  |  |  |  |  |  |  |  |  |  |  |  |  |  |  |  |  |  |  |  |  |  |  |  |  |  |  |  |  |  |  |  |  |  |  |  |  |  |  |  |  |  |  |  |  |  |  |  |  |  |  |  |  |  |  |  |  |  |  |  |  |  |  |  |  |  |  |  |  |  |  |  |  |  |  |  |  |  |  |  |  |  |  |  |  |  |  |  |  |  |  |  |  |  |  |  |  |  |  |  |  |  |  |  |  |  |  |  |  |  |  |  |  |  |  |  |  |  |  |  |  |  |  |  |  |  |  |  |  |  |  |  |  |  |  |  |  |  |  |  |  |  |  |  |  |  |  |  |  |  |  |  |  |  |  |  |  |  |  |  |  |  |  |  |  |  |  |  |  |  |  |  |  |  |  |  |  |  |  |  |  |  |  |  |  |  |  |  |  |  |  |  |  |  |  |  |  |  |  |  |  |  |  |  |  |  |  |  |  |  |  |  |  |  |  |  |  |  |  |  |  |  |  |  |  |  |  |  |  |  |  |  |  |  |  |  |  |  |  |  |  |  |  |  |  |  |  |  |  |  |  |  |  |  |  |  |  |  |  |  |  |  |  |  |  |  |  |  |  |  |  |  |  |  |  |  |  |  |  |  |  |  |  |  |  |  |  |  |  |  |  |  |  |  |  |  |  |  |  |  |  |  |  |  |  |  |  |  |  |  |  |  |  |  |  |  |  |  |  |  |  |  |  |  |  |  |  |  |  |  |  |  |  |  |  |  |  |  |  |  |  |  |  |  |  |  |  |  |  |  |  |  |  |  |  |  |  |  |  |  |  |  |  |  |  |  |  |  |  |  |  |  |  |  |  |  |  |  |  |  |  |  |  |  |  |  |  |  |  |  |  |  |  |  |  |  |  |  |  |  |  |  |  |  |  |  |  |  |  |  |  |  |  |  |  |  |  |  |  |  |  |  |  |  |  |  |  |  |  |  |  |  |  |  |  |  |  |  |  |  |  |  |  |  |  |  |  |  |  |  |  |  |  |  |  |  |  |  |  |  |  |  |  |  |  |  |  |  |  |  |  |  |  |  |  |  |  |  |  |  |  |  |  |  |  |  |  |  |  |  |  |  |  |  |  |  |  |  |  |  |  |  |  |  |  |  |  |  |  |  |  |  |  |  |  |  |  |  |  |  |  |  |  |  |  |  |  |  |  |  |  |  |  |  |  |  |  |  |  |  |  |  |  |  |  |  |  |  |  |  |  |  |  |  |  |  |  |  |  |  |  |  |  |  |  |  |  |  |  |  |  |  |  |  |  |  |  |  |  |  |  |  |  |  |  |  |  |  |  |  |  |  |  |  |  |  |  |  |  |  |  |  |  |  |  |  |  |  |  |  |  |  |  |  |  |  |  |  |  |  |  |  |  |  |  |  |  |  |  |  |  |  |  |  |  |  |  |  |  |  |  |  |  |  |  |  |  |  |  |  |  |  |  |  |  |  |  |  |  |  |  |  |  |  |  |  |  |  |  |  |  |  |  |  |  |  |  |  |  |  |  |  |  |  |  |    |
|----------------------------------------------------------------------------------------------------------------------------------------------------------------------------------------------------------------------------------------------------------------------------------------------------|-------|--------------------------|----------|-----------------------|----------|------------|---------|----------|-------------------------------------------------------------------------------------|-------------------------------------------------------------------------------------------------------------------------------------------------------------------------------|--|--|--|-----------|--|--|--|--|--|--|--|--|--|--|--|--|--|--|--|--|--|--|--|--|--|--|--|--|--|--|--|--|--|--|--|--|--|--|--|--|--|--|--|--|--|--|--|--|--|--|--|--|--|--|--|--|--|--|--|--|--|--|--|--|--|--|--|--|--|--|--|--|--|--|--|--|--|--|--|--|--|--|--|--|--|--|--|--|--|--|--|--|--|--|--|--|--|--|--|--|--|--|--|--|--|--|--|--|--|--|--|--|--|--|--|--|--|--|--|--|--|--|--|--|--|--|--|--|--|--|--|--|--|--|--|--|--|--|--|--|--|--|--|--|--|--|--|--|--|--|--|--|--|--|--|--|--|--|--|--|--|--|--|--|--|--|--|--|--|--|--|--|--|--|--|--|--|--|--|--|--|--|--|--|--|--|--|--|--|--|--|--|--|--|--|--|--|--|--|--|--|--|--|--|--|--|--|--|--|--|--|--|--|--|--|--|--|--|--|--|--|--|--|--|--|--|--|--|--|--|--|--|--|--|--|--|--|--|--|--|--|--|--|--|--|--|--|--|--|--|--|--|--|--|--|--|--|--|--|--|--|--|--|--|--|--|--|--|--|--|--|--|--|--|--|--|--|--|--|--|--|--|--|--|--|--|--|--|--|--|--|--|--|--|--|--|--|--|--|--|--|--|--|--|--|--|--|--|--|--|--|--|--|--|--|--|--|--|--|--|--|--|--|--|--|--|--|--|--|--|--|--|--|--|--|--|--|--|--|--|--|--|--|--|--|--|--|--|--|--|--|--|--|--|--|--|--|--|--|--|--|--|--|--|--|--|--|--|--|--|--|--|--|--|--|--|--|--|--|--|--|--|--|--|--|--|--|--|--|--|--|--|--|--|--|--|--|--|--|--|--|--|--|--|--|--|--|--|--|--|--|--|--|--|--|--|--|--|--|--|--|--|--|--|--|--|--|--|--|--|--|--|--|--|--|--|--|--|--|--|--|--|--|--|--|--|--|--|--|--|--|--|--|--|--|--|--|--|--|--|--|--|--|--|--|--|--|--|--|--|--|--|--|--|--|--|--|--|--|--|--|--|--|--|--|--|--|--|--|--|--|--|--|--|--|--|--|--|--|--|--|--|--|--|--|--|--|--|--|--|--|--|--|--|--|--|--|--|--|--|--|--|--|--|--|--|--|--|--|--|--|--|--|--|--|--|--|--|--|--|--|--|--|--|--|--|--|--|--|--|--|--|--|--|--|--|--|--|--|--|--|--|--|--|--|--|--|--|--|--|--|--|--|--|--|--|--|--|--|--|--|--|--|--|--|--|--|--|--|--|--|--|--|--|--|--|--|--|--|--|--|--|--|--|--|--|--|--|--|--|--|--|--|--|--|--|--|--|--|--|--|--|--|--|--|--|--|--|--|--|--|--|--|--|--|--|--|--|--|--|--|--|--|--|--|--|--|--|--|--|--|--|--|--|--|--|--|--|--|--|--|--|--|--|--|--|--|--|--|--|--|--|--|--|--|--|--|--|--|--|--|--|--|--|--|--|--|--|--|--|--|--|--|--|--|--|--|--|--|--|--|--|--|--|--|--|--|--|--|--|--|--|--|--|--|--|--|--|--|--|--|--|--|--|--|--|--|--|--|--|--|--|--|--|--|--|--|--|--|--|--|--|--|--|--|--|--|--|--|--|--|--|--|--|--|--|--|--|--|--|--|--|--|--|--|--|--|--|--|--|--|--|--|--|--|--|--|--|--|--|--|--|--|--|--|--|--|--|--|--|--|--|--|--|--|--|--|--|--|--|--|--|--|--|--|--|--|--|--|--|--|--|--|--|--|--|--|--|--|--|--|--|--|--|--|--|--|--|--|--|--|--|--|--|--|--|--|--|--|--|--|--|--|--|--|--|--|--|--|--|--|--|--|--|--|--|--|--|--|--|--|--|--|--|--|--|--|--|--|--|--|--|--|--|--|--|--|--|--|--|--|--|--|--|--|--|--|--|--|--|--|--|--|--|--|--|--|--|--|--|--|--|--|--|--|--|--|--|--|--|--|--|--|--|--|--|--|--|--|--|--|--|--|--|--|--|--|--|--|--|--|--|--|--|--|--|--|--|--|--|--|--|--|--|--|--|--|--|--|--|--|--|--|--|--|--|--|--|--|--|--|--|--|--|--|--|--|--|--|--|--|--|--|--|--|--|--|--|--|--|--|--|--|--|--|--|--|--|--|--|--|--|--|--|--|--|--|--|--|--|--|--|--|--|--|--|--|--|--|--|--|--|--|--|--|--|--|--|--|--|--|--|--|--|--|--|--|--|--|--|--|--|--|--|--|--|--|--|--|--|--|--|--|--|--|--|--|--|--|--|--|--|--|--|--|--|--|--|--|--|--|--|--|--|--|--|--|--|--|--|--|--|--|--|--|--|--|--|--|--|--|--|--|--|--|--|--|--|--|--|--|--|--|--|--|--|--|--|--|--|--|--|--|--|--|--|--|--|--|--|--|--|--|--|--|--|--|--|--|--|--|--|--|--|--|--|--|--|--|--|--|--|--|--|--|--|--|--|--|--|--|--|--|--|--|--|--|--|--|--|--|--|--|--|--|--|--|--|--|--|--|--|--|--|--|--|--|--|--|--|--|--|--|--|--|--|--|--|--|--|--|--|--|--|--|--|--|--|--|--|--|--|--|--|--|--|--|--|--|--|--|--|--|--|--|--|--|--|--|--|--|--|--|--|--|--|--|--|--|--|--|--|--|--|--|--|--|--|--|--|--|--|--|--|--|--|--|--|--|--|--|--|--|--|--|--|--|--|--|--|--|--|--|--|--|--|--|--|--|--|--|--|--|--|--|--|--|--|--|--|--|--|--|--|--|--|--|--|--|--|--|--|--|--|--|--|----|
| CONFIDENCIAL                                                                                                                                                                                                                                                                                       | NOTAS | DOCUMENTOS DE REFERENCIA |          |                       |          | REVISIONES |         |          |                                                                                     | CLIENTE                                                                                                                                                                       |  |  |  | PROYECTO: |  |  |  |  |  |  |  |  |  |  |  |  |  |  |  |  |  |  |  |  |  |  |  |  |  |  |  |  |  |  |  |  |  |  |  |  |  |  |  |  |  |  |  |  |  |  |  |  |  |  |  |  |  |  |  |  |  |  |  |  |  |  |  |  |  |  |  |  |  |  |  |  |  |  |  |  |  |  |  |  |  |  |  |  |  |  |  |  |  |  |  |  |  |  |  |  |  |  |  |  |  |  |  |  |  |  |  |  |  |  |  |  |  |  |  |  |  |  |  |  |  |  |  |  |  |  |  |  |  |  |  |  |  |  |  |  |  |  |  |  |  |  |  |  |  |  |  |  |  |  |  |  |  |  |  |  |  |  |  |  |  |  |  |  |  |  |  |  |  |  |  |  |  |  |  |  |  |  |  |  |  |  |  |  |  |  |  |  |  |  |  |  |  |  |  |  |  |  |  |  |  |  |  |  |  |  |  |  |  |  |  |  |  |  |  |  |  |  |  |  |  |  |  |  |  |  |  |  |  |  |  |  |  |  |  |  |  |  |  |  |  |  |  |  |  |  |  |  |  |  |  |  |  |  |  |  |  |  |  |  |  |  |  |  |  |  |  |  |  |  |  |  |  |  |  |  |  |  |  |  |  |  |  |  |  |  |  |  |  |  |  |  |  |  |  |  |  |  |  |  |  |  |  |  |  |  |  |  |  |  |  |  |  |  |  |  |  |  |  |  |  |  |  |  |  |  |  |  |  |  |  |  |  |  |  |  |  |  |  |  |  |  |  |  |  |  |  |  |  |  |  |  |  |  |  |  |  |  |  |  |  |  |  |  |  |  |  |  |  |  |  |  |  |  |  |  |  |  |  |  |  |  |  |  |  |  |  |  |  |  |  |  |  |  |  |  |  |  |  |  |  |  |  |  |  |  |  |  |  |  |  |  |  |  |  |  |  |  |  |  |  |  |  |  |  |  |  |  |  |  |  |  |  |  |  |  |  |  |  |  |  |  |  |  |  |  |  |  |  |  |  |  |  |  |  |  |  |  |  |  |  |  |  |  |  |  |  |  |  |  |  |  |  |  |  |  |  |  |  |  |  |  |  |  |  |  |  |  |  |  |  |  |  |  |  |  |  |  |  |  |  |  |  |  |  |  |  |  |  |  |  |  |  |  |  |  |  |  |  |  |  |  |  |  |  |  |  |  |  |  |  |  |  |  |  |  |  |  |  |  |  |  |  |  |  |  |  |  |  |  |  |  |  |  |  |  |  |  |  |  |  |  |  |  |  |  |  |  |  |  |  |  |  |  |  |  |  |  |  |  |  |  |  |  |  |  |  |  |  |  |  |  |  |  |  |  |  |  |  |  |  |  |  |  |  |  |  |  |  |  |  |  |  |  |  |  |  |  |  |  |  |  |  |  |  |  |  |  |  |  |  |  |  |  |  |  |  |  |  |  |  |  |  |  |  |  |  |  |  |  |  |  |  |  |  |  |  |  |  |  |  |  |  |  |  |  |  |  |  |  |  |  |  |  |  |  |  |  |  |  |  |  |  |  |  |  |  |  |  |  |  |  |  |  |  |  |  |  |  |  |  |  |  |  |  |  |  |  |  |  |  |  |  |  |  |  |  |  |  |  |  |  |  |  |  |  |  |  |  |  |  |  |  |  |  |  |  |  |  |  |  |  |  |  |  |  |  |  |  |  |  |  |  |  |  |  |  |  |  |  |  |  |  |  |  |  |  |  |  |  |  |  |  |  |  |  |  |  |  |  |  |  |  |  |  |  |  |  |  |  |  |  |  |  |  |  |  |  |  |  |  |  |  |  |  |  |  |  |  |  |  |  |  |  |  |  |  |  |  |  |  |  |  |  |  |  |  |  |  |  |  |  |  |  |  |  |  |  |  |  |  |  |  |  |  |  |  |  |  |  |  |  |  |  |  |  |  |  |  |  |  |  |  |  |  |  |  |  |  |  |  |  |  |  |  |  |  |  |  |  |  |  |  |  |  |  |  |  |  |  |  |  |  |  |  |  |  |  |  |  |  |  |  |  |  |  |  |  |  |  |  |  |  |  |  |  |  |  |  |  |  |  |  |  |  |  |  |  |  |  |  |  |  |  |  |  |  |  |  |  |  |  |  |  |  |  |  |  |  |  |  |  |  |  |  |  |  |  |  |  |  |  |  |  |  |  |  |  |  |  |  |  |  |  |  |  |  |  |  |  |  |  |  |  |  |  |  |  |  |  |  |  |  |  |  |  |  |  |  |  |  |  |  |  |  |  |  |  |  |  |  |  |  |  |  |  |  |  |  |  |  |  |  |  |  |  |  |  |  |  |  |  |  |  |  |  |  |  |  |  |  |  |  |  |  |  |  |  |  |  |  |  |  |  |  |  |  |  |  |  |  |  |  |  |  |  |  |  |  |  |  |  |  |  |  |  |  |  |  |  |  |  |  |  |  |  |  |  |  |  |  |  |  |  |  |  |  |  |  |  |  |  |  |  |  |  |  |  |  |  |  |  |  |  |  |  |  |  |  |  |  |  |  |  |  |  |  |  |  |  |  |  |  |  |  |  |  |  |  |  |  |  |  |  |  |  |  |  |  |  |  |  |  |  |  |  |  |  |  |  |  |  |  |  |  |  |  |  |  |  |  |  |  |  |  |  |  |  |  |  |  |  |  |  |  |  |  |  |  |  |  |  |  |  |  |  |  |  |  |  |  |  |  |  |  |  |  |  |  |  |  |  |  |  |  |  |  |  |  |  |  |  |  |  |  |  |  |  |  |  |  |  |  |  |  |  |  |  |  |  |  |  |  |  |  |  |  |  |  |  |  |  |  |  |  |  |  |  |  |  |  |  |  |  |  |  |  |  |  |  |  |  |  |  |  |  |  |  |  |  |  |  |    |
|                                                                                                                                                                                                                                                                                                    |       | REV.                     | FECHA    | DESCRIPCIÓN           | DEBILLO  | PREPARO    | APROBÓ  | AUTORIZO |  | CONTRATACIÓN DE SERVICIO PARA LA DETERMINACIÓN DE LA ESTRATIGRAFÍA DEL ÁREA NUCLEAR DE LA ZONA ARQUEOLÓGICA MONUMENTAL DE KUÉLAP<br>NÚMERO DE CONTRATO: Nº 030-2023-06A-SG/MC |  |  |  |           |  |  |  |  |  |  |  |  |  |  |  |  |  |  |  |  |  |  |  |  |  |  |  |  |  |  |  |  |  |  |  |  |  |  |  |  |  |  |  |  |  |  |  |  |  |  |  |  |  |  |  |  |  |  |  |  |  |  |  |  |  |  |  |  |  |  |  |  |  |  |  |  |  |  |  |  |  |  |  |  |  |  |  |  |  |  |  |  |  |  |  |  |  |  |  |  |  |  |  |  |  |  |  |  |  |  |  |  |  |  |  |  |  |  |  |  |  |  |  |  |  |  |  |  |  |  |  |  |  |  |  |  |  |  |  |  |  |  |  |  |  |  |  |  |  |  |  |  |  |  |  |  |  |  |  |  |  |  |  |  |  |  |  |  |  |  |  |  |  |  |  |  |  |  |  |  |  |  |  |  |  |  |  |  |  |  |  |  |  |  |  |  |  |  |  |  |  |  |  |  |  |  |  |  |  |  |  |  |  |  |  |  |  |  |  |  |  |  |  |  |  |  |  |  |  |  |  |  |  |  |  |  |  |  |  |  |  |  |  |  |  |  |  |  |  |  |  |  |  |  |  |  |  |  |  |  |  |  |  |  |  |  |  |  |  |  |  |  |  |  |  |  |  |  |  |  |  |  |  |  |  |  |  |  |  |  |  |  |  |  |  |  |  |  |  |  |  |  |  |  |  |  |  |  |  |  |  |  |  |  |  |  |  |  |  |  |  |  |  |  |  |  |  |  |  |  |  |  |  |  |  |  |  |  |  |  |  |  |  |  |  |  |  |  |  |  |  |  |  |  |  |  |  |  |  |  |  |  |  |  |  |  |  |  |  |  |  |  |  |  |  |  |  |  |  |  |  |  |  |  |  |  |  |  |  |  |  |  |  |  |  |  |  |  |  |  |  |  |  |  |  |  |  |  |  |  |  |  |  |  |  |  |  |  |  |  |  |  |  |  |  |  |  |  |  |  |  |  |  |  |  |  |  |  |  |  |  |  |  |  |  |  |  |  |  |  |  |  |  |  |  |  |  |  |  |  |  |  |  |  |  |  |  |  |  |  |  |  |  |  |  |  |  |  |  |  |  |  |  |  |  |  |  |  |  |  |  |  |  |  |  |  |  |  |  |  |  |  |  |  |  |  |  |  |  |  |  |  |  |  |  |  |  |  |  |  |  |  |  |  |  |  |  |  |  |  |  |  |  |  |  |  |  |  |  |  |  |  |  |  |  |  |  |  |  |  |  |  |  |  |  |  |  |  |  |  |  |  |  |  |  |  |  |  |  |  |  |  |  |  |  |  |  |  |  |  |  |  |  |  |  |  |  |  |  |  |  |  |  |  |  |  |  |  |  |  |  |  |  |  |  |  |  |  |  |  |  |  |  |  |  |  |  |  |  |  |  |  |  |  |  |  |  |  |  |  |  |  |  |  |  |  |  |  |  |  |  |  |  |  |  |  |  |  |  |  |  |  |  |  |  |  |  |  |  |  |  |  |  |  |  |  |  |  |  |  |  |  |  |  |  |  |  |  |  |  |  |  |  |  |  |  |  |  |  |  |  |  |  |  |  |  |  |  |  |  |  |  |  |  |  |  |  |  |  |  |  |  |  |  |  |  |  |  |  |  |  |  |  |  |  |  |  |  |  |  |  |  |  |  |  |  |  |  |  |  |  |  |  |  |  |  |  |  |  |  |  |  |  |  |  |  |  |  |  |  |  |  |  |  |  |  |  |  |  |  |  |  |  |  |  |  |  |  |  |  |  |  |  |  |  |  |  |  |  |  |  |  |  |  |  |  |  |  |  |  |  |  |  |  |  |  |  |  |  |  |  |  |  |  |  |  |  |  |  |  |  |  |  |  |  |  |  |  |  |  |  |  |  |  |  |  |  |  |  |  |  |  |  |  |  |  |  |  |  |  |  |  |  |  |  |  |  |  |  |  |  |  |  |  |  |  |  |  |  |  |  |  |  |  |  |  |  |  |  |  |  |  |  |  |  |  |  |  |  |  |  |  |  |  |  |  |  |  |  |  |  |  |  |  |  |  |  |  |  |  |  |  |  |  |  |  |  |  |  |  |  |  |  |  |  |  |  |  |  |  |  |  |  |  |  |  |  |  |  |  |  |  |  |  |  |  |  |  |  |  |  |  |  |  |  |  |  |  |  |  |  |  |  |  |  |  |  |  |  |  |  |  |  |  |  |  |  |  |  |  |  |  |  |  |  |  |  |  |  |  |  |  |  |  |  |  |  |  |  |  |  |  |  |  |  |  |  |  |  |  |  |  |  |  |  |  |  |  |  |  |  |  |  |  |  |  |  |  |  |  |  |  |  |  |  |  |  |  |  |  |  |  |  |  |  |  |  |  |  |  |  |  |  |  |  |  |  |  |  |  |  |  |  |  |  |  |  |  |  |  |  |  |  |  |  |  |  |  |  |  |  |  |  |  |  |  |  |  |  |  |  |  |  |  |  |  |  |  |  |  |  |  |  |  |  |  |  |  |  |  |  |  |  |  |  |  |  |  |  |  |  |  |  |  |  |  |  |  |  |  |  |  |  |  |  |  |  |  |  |  |  |  |  |  |  |  |  |  |  |  |  |  |  |  |  |  |  |  |  |  |  |  |  |  |  |  |  |  |  |  |  |  |  |  |  |  |  |  |  |  |  |  |  |  |  |  |  |  |  |  |  |  |  |  |  |  |  |  |  |  |  |  |  |  |  |  |  |  |  |  |  |  |  |  |  |  |  |  |  |  |  |  |  |  |  |  |  |  |  |  |  |  |  |  |  |  |  |  |  |  |  |  |  |  |  |  |  |  |  |  |  |  |  |  |  |  |  |  |  |  |  |  |  |  |  |  |  |  |  |  |  |  |  |  |  |  |  |  |  |  |  |  |  |  |  |  |    |
|                                                                                                                                                                                                                                                                                                    |       | A                        | 04/07/23 | EMITIDO PARA REVISIÓN | S-BLANCO | S-BLANCO   | N. MORI | N. MORI  |                                                                                     |                                                                                                                                                                               |  |  |  |           |  |  |  |  |  |  |  |  |  |  |  |  |  |  |  |  |  |  |  |  |  |  |  |  |  |  |  |  |  |  |  |  |  |  |  |  |  |  |  |  |  |  |  |  |  |  |  |  |  |  |  |  |  |  |  |  |  |  |  |  |  |  |  |  |  |  |  |  |  |  |  |  |  |  |  |  |  |  |  |  |  |  |  |  |  |  |  |  |  |  |  |  |  |  |  |  |  |  |  |  |  |  |  |  |  |  |  |  |  |  |  |  |  |  |  |  |  |  |  |  |  |  |  |  |  |  |  |  |  |  |  |  |  |  |  |  |  |  |  |  |  |  |  |  |  |  |  |  |  |  |  |  |  |  |  |  |  |  |  |  |  |  |  |  |  |  |  |  |  |  |  |  |  |  |  |  |  |  |  |  |  |  |  |  |  |  |  |  |  |  |  |  |  |  |  |  |  |  |  |  |  |  |  |  |  |  |  |  |  |  |  |  |  |  |  |  |  |  |  |  |  |  |  |  |  |  |  |  |  |  |  |  |  |  |  |  |  |  |  |  |  |  |  |  |  |  |  |  |  |  |  |  |  |  |  |  |  |  |  |  |  |  |  |  |  |  |  |  |  |  |  |  |  |  |  |  |  |  |  |  |  |  |  |  |  |  |  |  |  |  |  |  |  |  |  |  |  |  |  |  |  |  |  |  |  |  |  |  |  |  |  |  |  |  |  |  |  |  |  |  |  |  |  |  |  |  |  |  |  |  |  |  |  |  |  |  |  |  |  |  |  |  |  |  |  |  |  |  |  |  |  |  |  |  |  |  |  |  |  |  |  |  |  |  |  |  |  |  |  |  |  |  |  |  |  |  |  |  |  |  |  |  |  |  |  |  |  |  |  |  |  |  |  |  |  |  |  |  |  |  |  |  |  |  |  |  |  |  |  |  |  |  |  |  |  |  |  |  |  |  |  |  |  |  |  |  |  |  |  |  |  |  |  |  |  |  |  |  |  |  |  |  |  |  |  |  |  |  |  |  |  |  |  |  |  |  |  |  |  |  |  |  |  |  |  |  |  |  |  |  |  |  |  |  |  |  |  |  |  |  |  |  |  |  |  |  |  |  |  |  |  |  |  |  |  |  |  |  |  |  |  |  |  |  |  |  |  |  |  |  |  |  |  |  |  |  |  |  |  |  |  |  |  |  |  |  |  |  |  |  |  |  |  |  |  |  |  |  |  |  |  |  |  |  |  |  |  |  |  |  |  |  |  |  |  |  |  |  |  |  |  |  |  |  |  |  |  |  |  |  |  |  |  |  |  |  |  |  |  |  |  |  |  |  |  |  |  |  |  |  |  |  |  |  |  |  |  |  |  |  |  |  |  |  |  |  |  |  |  |  |  |  |  |  |  |  |  |  |  |  |  |  |  |  |  |  |  |  |  |  |  |  |  |  |  |  |  |  |  |  |  |  |  |  |  |  |  |  |  |  |  |  |  |  |  |  |  |  |  |  |  |  |  |  |  |  |  |  |  |  |  |  |  |  |  |  |  |  |  |  |  |  |  |  |  |  |  |  |  |  |  |  |  |  |  |  |  |  |  |  |  |  |  |  |  |  |  |  |  |  |  |  |  |  |  |  |  |  |  |  |  |  |  |  |  |  |  |  |  |  |  |  |  |  |  |  |  |  |  |  |  |  |  |  |  |  |  |  |  |  |  |  |  |  |  |  |  |  |  |  |  |  |  |  |  |  |  |  |  |  |  |  |  |  |  |  |  |  |  |  |  |  |  |  |  |  |  |  |  |  |  |  |  |  |  |  |  |  |  |  |  |  |  |  |  |  |  |  |  |  |  |  |  |  |  |  |  |  |  |  |  |  |  |  |  |  |  |  |  |  |  |  |  |  |  |  |  |  |  |  |  |  |  |  |  |  |  |  |  |  |  |  |  |  |  |  |  |  |  |  |  |  |  |  |  |  |  |  |  |  |  |  |  |  |  |  |  |  |  |  |  |  |  |  |  |  |  |  |  |  |  |  |  |  |  |  |  |  |  |  |  |  |  |  |  |  |  |  |  |  |  |  |  |  |  |  |  |  |  |  |  |  |  |  |  |  |  |  |  |  |  |  |  |  |  |  |  |  |  |  |  |  |  |  |  |  |  |  |  |  |  |  |  |  |  |  |  |  |  |  |  |  |  |  |  |  |  |  |  |  |  |  |  |  |  |  |  |  |  |  |  |  |  |  |  |  |  |  |  |  |  |  |  |  |  |  |  |  |  |  |  |  |  |  |  |  |  |  |  |  |  |  |  |  |  |  |  |  |  |  |  |  |  |  |  |  |  |  |  |  |  |  |  |  |  |  |  |  |  |  |  |  |  |  |  |  |  |  |  |  |  |  |  |  |  |  |  |  |  |  |  |  |  |  |  |  |  |  |  |  |  |  |  |  |  |  |  |  |  |  |  |  |  |  |  |  |  |  |  |  |  |  |  |  |  |  |  |  |  |  |  |  |  |  |  |  |  |  |  |  |  |  |  |  |  |  |  |  |  |  |  |  |  |  |  |  |  |  |  |  |  |  |  |  |  |  |  |  |  |  |  |  |  |  |  |  |  |  |  |  |  |  |  |  |  |  |  |  |  |  |  |  |  |  |  |  |  |  |  |  |  |  |  |  |  |  |  |  |  |  |  |  |  |  |  |  |  |  |  |  |  |  |  |  |  |  |  |  |  |  |  |  |  |  |  |  |  |  |  |  |  |  |  |  |  |  |  |  |  |  |  |  |  |  |  |  |  |  |  |  |  |  |  |  |  |  |  |  |  |  |  |  |  |  |  |  |  |  |  |  |  |  |  |  |  |  |  |  |  |  |  |  |  |  |  |  |  |  |  |  |  |  |  |  |  |  |  |  |  |  |  |  |    |
|                                                                                                                                                                                                                                                                                                    |       |                          |          |                       |          |            |         |          |                                                                                     |                                                                                                                                                                               |  |  |  |           |  |  |  |  |  |  |  |  |  |  |  |  |  |  |  |  |  |  |  |  |  |  |  |  |  |  |  |  |  |  |  |  |  |  |  |  |  |  |  |  |  |  |  |  |  |  |  |  |  |  |  |  |  |  |  |  |  |  |  |  |  |  |  |  |  |  |  |  |  |  |  |  |  |  |  |  |  |  |  |  |  |  |  |  |  |  |  |  |  |  |  |  |  |  |  |  |  |  |  |  |  |  |  |  |  |  |  |  |  |  |  |  |  |  |  |  |  |  |  |  |  |  |  |  |  |  |  |  |  |  |  |  |  |  |  |  |  |  |  |  |  |  |  |  |  |  |  |  |  |  |  |  |  |  |  |  |  |  |  |  |  |  |  |  |  |  |  |  |  |  |  |  |  |  |  |  |  |  |  |  |  |  |  |  |  |  |  |  |  |  |  |  |  |  |  |  |  |  |  |  |  |  |  |  |  |  |  |  |  |  |  |  |  |  |  |  |  |  |  |  |  |  |  |  |  |  |  |  |  |  |  |  |  |  |  |  |  |  |  |  |  |  |  |  |  |  |  |  |  |  |  |  |  |  |  |  |  |  |  |  |  |  |  |  |  |  |  |  |  |  |  |  |  |  |  |  |  |  |  |  |  |  |  |  |  |  |  |  |  |  |  |  |  |  |  |  |  |  |  |  |  |  |  |  |  |  |  |  |  |  |  |  |  |  |  |  |  |  |  |  |  |  |  |  |  |  |  |  |  |  |  |  |  |  |  |  |  |  |  |  |  |  |  |  |  |  |  |  |  |  |  |  |  |  |  |  |  |  |  |  |  |  |  |  |  |  |  |  |  |  |  |  |  |  |  |  |  |  |  |  |  |  |  |  |  |  |  |  |  |  |  |  |  |  |  |  |  |  |  |  |  |  |  |  |  |  |  |  |  |  |  |  |  |  |  |  |  |  |  |  |  |  |  |  |  |  |  |  |  |  |  |  |  |  |  |  |  |  |  |  |  |  |  |  |  |  |  |  |  |  |  |  |  |  |  |  |  |  |  |  |  |  |  |  |  |  |  |  |  |  |  |  |  |  |  |  |  |  |  |  |  |  |  |  |  |  |  |  |  |  |  |  |  |  |  |  |  |  |  |  |  |  |  |  |  |  |  |  |  |  |  |  |  |  |  |  |  |  |  |  |  |  |  |  |  |  |  |  |  |  |  |  |  |  |  |  |  |  |  |  |  |  |  |  |  |  |  |  |  |  |  |  |  |  |  |  |  |  |  |  |  |  |  |  |  |  |  |  |  |  |  |  |  |  |  |  |  |  |  |  |  |  |  |  |  |  |  |  |  |  |  |  |  |  |  |  |  |  |  |  |  |  |  |  |  |  |  |  |  |  |  |  |  |  |  |  |  |  |  |  |  |  |  |  |  |  |  |  |  |  |  |  |  |  |  |  |  |  |  |  |  |  |  |  |  |  |  |  |  |  |  |  |  |  |  |  |  |  |  |  |  |  |  |  |  |  |  |  |  |  |  |  |  |  |  |  |  |  |  |  |  |  |  |  |  |  |  |  |  |  |  |  |  |  |  |  |  |  |  |  |  |  |  |  |  |  |  |  |  |  |  |  |  |  |  |  |  |  |  |  |  |  |  |  |  |  |  |  |  |  |  |  |  |  |  |  |  |  |  |  |  |  |  |  |  |  |  |  |  |  |  |  |  |  |  |  |  |  |  |  |  |  |  |  |  |  |  |  |  |  |  |  |  |  |  |  |  |  |  |  |  |  |  |  |  |  |  |  |  |  |  |  |  |  |  |  |  |  |  |  |  |  |  |  |  |  |  |  |  |  |  |  |  |  |  |  |  |  |  |  |  |  |  |  |  |  |  |  |  |  |  |  |  |  |  |  |  |  |  |  |  |  |  |  |  |  |  |  |  |  |  |  |  |  |  |  |  |  |  |  |  |  |  |  |  |  |  |  |  |  |  |  |  |  |  |  |  |  |  |  |  |  |  |  |  |  |  |  |  |  |  |  |  |  |  |  |  |  |  |  |  |  |  |  |  |  |  |  |  |  |  |  |  |  |  |  |  |  |  |  |  |  |  |  |  |  |  |  |  |  |  |  |  |  |  |  |  |  |  |  |  |  |  |  |  |  |  |  |  |  |  |  |  |  |  |  |  |  |  |  |  |  |  |  |  |  |  |  |  |  |  |  |  |  |  |  |  |  |  |  |  |  |  |  |  |  |  |  |  |  |  |  |  |  |  |  |  |  |  |  |  |  |  |  |  |  |  |  |  |  |  |  |  |  |  |  |  |  |  |  |  |  |  |  |  |  |  |  |  |  |  |  |  |  |  |  |  |  |  |  |  |  |  |  |  |  |  |  |  |  |  |  |  |  |  |  |  |  |  |  |  |  |  |  |  |  |  |  |  |  |  |  |  |  |  |  |  |  |  |  |  |  |  |  |  |  |  |  |  |  |  |  |  |  |  |  |  |  |  |  |  |  |  |  |  |  |  |  |  |  |  |  |  |  |  |  |  |  |  |  |  |  |  |  |  |  |  |  |  |  |  |  |  |  |  |  |  |  |  |  |  |  |  |  |  |  |  |  |  |  |  |  |  |  |  |  |  |  |  |  |  |  |  |  |  |  |  |  |  |  |  |  |  |  |  |  |  |  |  |  |  |  |  |  |  |  |  |  |  |  |  |  |  |  |  |  |  |  |  |  |  |  |  |  |  |  |  |  |  |  |  |  |  |  |  |  |  |  |  |  |  |  |  |  |  |  |  |  |  |  |  |  |  |  |  |  |  |  |  |  |  |  |  |  |  |  |  |  |  |  |  |  |  |  |  |  |  |  |  |  |  |  |  |  |  |  |  |  |  |  |  |  |  |  |  |  |  |  |  |  |  |  |    |
|                                                                                                                                                                                                                                                                                                    |       |                          |          |                       |          |            |         |          |                                                                                     |                                                                                                                                                                               |  |  |  |           |  |  |  |  |  |  |  |  |  |  |  |  |  |  |  |  |  |  |  |  |  |  |  |  |  |  |  |  |  |  |  |  |  |  |  |  |  |  |  |  |  |  |  |  |  |  |  |  |  |  |  |  |  |  |  |  |  |  |  |  |  |  |  |  |  |  |  |  |  |  |  |  |  |  |  |  |  |  |  |  |  |  |  |  |  |  |  |  |  |  |  |  |  |  |  |  |  |  |  |  |  |  |  |  |  |  |  |  |  |  |  |  |  |  |  |  |  |  |  |  |  |  |  |  |  |  |  |  |  |  |  |  |  |  |  |  |  |  |  |  |  |  |  |  |  |  |  |  |  |  |  |  |  |  |  |  |  |  |  |  |  |  |  |  |  |  |  |  |  |  |  |  |  |  |  |  |  |  |  |  |  |  |  |  |  |  |  |  |  |  |  |  |  |  |  |  |  |  |  |  |  |  |  |  |  |  |  |  |  |  |  |  |  |  |  |  |  |  |  |  |  |  |  |  |  |  |  |  |  |  |  |  |  |  |  |  |  |  |  |  |  |  |  |  |  |  |  |  |  |  |  |  |  |  |  |  |  |  |  |  |  |  |  |  |  |  |  |  |  |  |  |  |  |  |  |  |  |  |  |  |  |  |  |  |  |  |  |  |  |  |  |  |  |  |  |  |  |  |  |  |  |  |  |  |  |  |  |  |  |  |  |  |  |  |  |  |  |  |  |  |  |  |  |  |  |  |  |  |  |  |  |  |  |  |  |  |  |  |  |  |  |  |  |  |  |  |  |  |  |  |  |  |  |  |  |  |  |  |  |  |  |  |  |  |  |  |  |  |  |  |  |  |  |  |  |  |  |  |  |  |  |  |  |  |  |  |  |  |  |  |  |  |  |  |  |  |  |  |  |  |  |  |  |  |  |  |  |  |  |  |  |  |  |  |  |  |  |  |  |  |  |  |  |  |  |  |  |  |  |  |  |  |  |  |  |  |  |  |  |  |  |  |  |  |  |  |  |  |  |  |  |  |  |  |  |  |  |  |  |  |  |  |  |  |  |  |  |  |  |  |  |  |  |  |  |  |  |  |  |  |  |  |  |  |  |  |  |  |  |  |  |  |  |  |  |  |  |  |  |  |  |  |  |  |  |  |  |  |  |  |  |  |  |  |  |  |  |  |  |  |  |  |  |  |  |  |  |  |  |  |  |  |  |  |  |  |  |  |  |  |  |  |  |  |  |  |  |  |  |  |  |  |  |  |  |  |  |  |  |  |  |  |  |  |  |  |  |  |  |  |  |  |  |  |  |  |  |  |  |  |  |  |  |  |  |  |  |  |  |  |  |  |  |  |  |  |  |  |  |  |  |  |  |  |  |  |  |  |  |  |  |  |  |  |  |  |  |  |  |  |  |  |  |  |  |  |  |  |  |  |  |  |  |  |  |  |  |  |  |  |  |  |  |  |  |  |  |  |  |  |  |  |  |  |  |  |  |  |  |  |  |  |  |  |  |  |  |  |  |  |  |  |  |  |  |  |  |  |  |  |  |  |  |  |  |  |  |  |  |  |  |  |  |  |  |  |  |  |  |  |  |  |  |  |  |  |  |  |  |  |  |  |  |  |  |  |  |  |  |  |  |  |  |  |  |  |  |  |  |  |  |  |  |  |  |  |  |  |  |  |  |  |  |  |  |  |  |  |  |  |  |  |  |  |  |  |  |  |  |  |  |  |  |  |  |  |  |  |  |  |  |  |  |  |  |  |  |  |  |  |  |  |  |  |  |  |  |  |  |  |  |  |  |  |  |  |  |  |  |  |  |  |  |  |  |  |  |  |  |  |  |  |  |  |  |  |  |  |  |  |  |  |  |  |  |  |  |  |  |  |  |  |  |  |  |  |  |  |  |  |  |  |  |  |  |  |  |  |  |  |  |  |  |  |  |  |  |  |  |  |  |  |  |  |  |  |  |  |  |  |  |  |  |  |  |  |  |  |  |  |  |  |  |  |  |  |  |  |  |  |  |  |  |  |  |  |  |  |  |  |  |  |  |  |  |  |  |  |  |  |  |  |  |  |  |  |  |  |  |  |  |  |  |  |  |  |  |  |  |  |  |  |  |  |  |  |  |  |  |  |  |  |  |  |  |  |  |  |  |  |  |  |  |  |  |  |  |  |  |  |  |  |  |  |  |  |  |  |  |  |  |  |  |  |  |  |  |  |  |  |  |  |  |  |  |  |  |  |  |  |  |  |  |  |  |  |  |  |  |  |  |  |  |  |  |  |  |  |  |  |  |  |  |  |  |  |  |  |  |  |  |  |  |  |  |  |  |  |  |  |  |  |  |  |  |  |  |  |  |  |  |  |  |  |  |  |  |  |  |  |  |  |  |  |  |  |  |  |  |  |  |  |  |  |  |  |  |  |  |  |  |  |  |  |  |  |  |  |  |  |  |  |  |  |  |  |  |  |  |  |  |  |  |  |  |  |  |  |  |  |  |  |  |  |  |  |  |  |  |  |  |  |  |  |  |  |  |  |  |  |  |  |  |  |  |  |  |  |  |  |  |  |  |  |  |  |  |  |  |  |  |  |  |  |  |  |  |  |  |  |  |  |  |  |  |  |  |  |  |  |  |  |  |  |  |  |  |  |  |  |  |  |  |  |  |  |  |  |  |  |  |  |  |  |  |  |  |  |  |  |  |  |  |  |  |  |  |  |  |  |  |  |  |  |  |  |  |  |  |  |  |  |  |  |  |  |  |  |  |  |  |  |  |  |  |  |  |  |  |  |  |  |  |  |  |  |  |  |  |  |  |  |  |  |  |  |  |  |  |  |  |  |  |  |  |  |  |  |  |  |  |  |  |  |  |  |  |  |  |  |  |  |  |  |  |  |  |  |  |  |  |  |    |
| ESTE PLANO Y LA INFORMACIÓN QUE CONTIENE SON PROPIEDAD DEL CLIENTE. SU USO SIN LA AUTORIZACIÓN POR ESCRITO DEL CLIENTE, CONSTITUYE UNA VIOLACIÓN DE LOS DATOS CONTENIDOS EN ESTE PLANO DEBEN SER DE RESPONSABILIDAD EXCLUSIVA DEL USUARIO SIN NINGUNA RESPONSABILIDAD LEGAL POR PARTE DEL CLIENTE. |       |                          |          |                       |          |            |         |          |                                                                                     |                                                                                                                                                                               |  |  |  |           |  |  |  |  |  |  |  |  |  |  |  |  |  |  |  |  |  |  |  |  |  |  |  |  |  |  |  |  |  |  |  |  |  |  |  |  |  |  |  |  |  |  |  |  |  |  |  |  |  |  |  |  |  |  |  |  |  |  |  |  |  |  |  |  |  |  |  |  |  |  |  |  |  |  |  |  |  |  |  |  |  |  |  |  |  |  |  |  |  |  |  |  |  |  |  |  |  |  |  |  |  |  |  |  |  |  |  |  |  |  |  |  |  |  |  |  |  |  |  |  |  |  |  |  |  |  |  |  |  |  |  |  |  |  |  |  |  |  |  |  |  |  |  |  |  |  |  |  |  |  |  |  |  |  |  |  |  |  |  |  |  |  |  |  |  |  |  |  |  |  |  |  |  |  |  |  |  |  |  |  |  |  |  |  |  |  |  |  |  |  |  |  |  |  |  |  |  |  |  |  |  |  |  |  |  |  |  |  |  |  |  |  |  |  |  |  |  |  |  |  |  |  |  |  |  |  |  |  |  |  |  |  |  |  |  |  |  |  |  |  |  |  |  |  |  |  |  |  |  |  |  |  |  |  |  |  |  |  |  |  |  |  |  |  |  |  |  |  |  |  |  |  |  |  |  |  |  |  |  |  |  |  |  |  |  |  |  |  |  |  |  |  |  |  |  |  |  |  |  |  |  |  |  |  |  |  |  |  |  |  |  |  |  |  |  |  |  |  |  |  |  |  |  |  |  |  |  |  |  |  |  |  |  |  |  |  |  |  |  |  |  |  |  |  |  |  |  |  |  |  |  |  |  |  |  |  |  |  |  |  |  |  |  |  |  |  |  |  |  |  |  |  |  |  |  |  |  |  |  |  |  |  |  |  |  |  |  |  |  |  |  |  |  |  |  |  |  |  |  |  |  |  |  |  |  |  |  |  |  |  |  |  |  |  |  |  |  |  |  |  |  |  |  |  |  |  |  |  |  |  |  |  |  |  |  |  |  |  |  |  |  |  |  |  |  |  |  |  |  |  |  |  |  |  |  |  |  |  |  |  |  |  |  |  |  |  |  |  |  |  |  |  |  |  |  |  |  |  |  |  |  |  |  |  |  |  |  |  |  |  |  |  |  |  |  |  |  |  |  |  |  |  |  |  |  |  |  |  |  |  |  |  |  |  |  |  |  |  |  |  |  |  |  |  |  |  |  |  |  |  |  |  |  |  |  |  |  |  |  |  |  |  |  |  |  |  |  |  |  |  |  |  |  |  |  |  |  |  |  |  |  |  |  |  |  |  |  |  |  |  |  |  |  |  |  |  |  |  |  |  |  |  |  |  |  |  |  |  |  |  |  |  |  |  |  |  |  |  |  |  |  |  |  |  |  |  |  |  |  |  |  |  |  |  |  |  |  |  |  |  |  |  |  |  |  |  |  |  |  |  |  |  |  |  |  |  |  |  |  |  |  |  |  |  |  |  |  |  |  |  |  |  |  |  |  |  |  |  |  |  |  |  |  |  |  |  |  |  |  |  |  |  |  |  |  |  |  |  |  |  |  |  |  |  |  |  |  |  |  |  |  |  |  |  |  |  |  |  |  |  |  |  |  |  |  |  |  |  |  |  |  |  |  |  |  |  |  |  |  |  |  |  |  |  |  |  |  |  |  |  |  |  |  |  |  |  |  |  |  |  |  |  |  |  |  |  |  |  |  |  |  |  |  |  |  |  |  |  |  |  |  |  |  |  |  |  |  |  |  |  |  |  |  |  |  |  |  |  |  |  |  |  |  |  |  |  |  |  |  |  |  |  |  |  |  |  |  |  |  |  |  |  |  |  |  |  |  |  |  |  |  |  |  |  |  |  |  |  |  |  |  |  |  |  |  |  |  |  |  |  |  |  |  |  |  |  |  |  |  |  |  |  |  |  |  |  |  |  |  |  |  |  |  |  |  |  |  |  |  |  |  |  |  |  |  |  |  |  |  |  |  |  |  |  |  |  |  |  |  |  |  |  |  |  |  |  |  |  |  |  |  |  |  |  |  |  |  |  |  |  |  |  |  |  |  |  |  |  |  |  |  |  |  |  |  |  |  |  |  |  |  |  |  |  |  |  |  |  |  |  |  |  |  |  |  |  |  |  |  |  |  |  |  |  |  |  |  |  |  |  |  |  |  |  |  |  |  |  |  |  |  |  |  |  |  |  |  |  |  |  |  |  |  |  |  |  |  |  |  |  |  |  |  |  |  |  |  |  |  |  |  |  |  |  |  |  |  |  |  |  |  |  |  |  |  |  |  |  |  |  |  |  |  |  |  |  |  |  |  |  |  |  |  |  |  |  |  |  |  |  |  |  |  |  |  |  |  |  |  |  |  |  |  |  |  |  |  |  |  |  |  |  |  |  |  |  |  |  |  |  |  |  |  |  |  |  |  |  |  |  |  |  |  |  |  |  |  |  |  |  |  |  |  |  |  |  |  |  |  |  |  |  |  |  |  |  |  |  |  |  |  |  |  |  |  |  |  |  |  |  |  |  |  |  |  |  |  |  |  |  |  |  |  |  |  |  |  |  |  |  |  |  |  |  |  |  |  |  |  |  |  |  |  |  |  |  |  |  |  |  |  |  |  |  |  |  |  |  |  |  |  |  |  |  |  |  |  |  |  |  |  |  |  |  |  |  |  |  |  |  |  |  |  |  |  |  |  |  |  |  |  |  |  |  |  |  |  |  |  |  |  |  |  |  |  |  |  |  |  |  |  |  |  |  |  |  |  |  |  |  |  |  |  |  |  |  |  |  |  |  |  |  |  |  |  |  |  |  |  |  |  |  |  |  |  |  |  |  |  |  |  |  |  |  |  |  |  |  |  |  |  |  |  |  |  |  |  |  |  |  |  |  |  |  |  |  |  |  |  |  |  |  | </ |



1 2 3 4 5 6 7 8

A B C D E F

0 50m 100m 1:1000

0 50m 100m 1:500

0 50m 100m 1:200

0 50m 100m 1:100

0 50m 100m 1:50

0 50m 100m 1:25

0 50m 100m 1:12.5

0 50m 100m 1:6.25

0 50m 100m 1:3.125

0 50m 100m 1:1.5625

0 50m 100m 1:0.78125

0 50m 100m 1:0.390625

0 50m 100m 1:0.1953125

0 50m 100m 1:0.09765625

0 50m 100m 1:0.048828125

0 50m 100m 1:0.0244140625

0 50m 100m 1:0.01220703125

0 50m 100m 1:0.006103515625

0 50m 100m 1:0.0030517578125

0 50m 100m 1:0.00152587890625

0 50m 100m 1:0.000762939453125

0 50m 100m 1:0.0003814697265625

0 50m 100m 1:0.00019073486328125

0 50m 100m 1:0.000095367431640625

0 50m 100m 1:0.0000476837158203125

0 50m 100m 1:0.00002384185791015625

0 50m 100m 1:0.000011920928955078125

0 50m 100m 1:0.0000059604644775390625

0 50m 100m 1:0.00000298023223876953125

0 50m 100m 1:0.000001490116119384765625

0 50m 100m 1:0.0000007450580596923828125

0 50m 100m 1:0.00000037252902984619140625

0 50m 100m 1:0.000000186264514923095703125

0 50m 100m 1:0.0000000931322574615478515625

0 50m 100m 1:0.00000004656612873077392578125

0 50m 100m 1:0.000000023283064365386962890625

0 50m 100m 1:0.0000000116415321826934814453125

0 50m 100m 1:0.00000000582076609134674072265625

0 50m 100m 1:0.000000002910383045673036361328125

0 50m 100m 1:0.0000000014551915228365181806640625

0 50m 100m 1:0.00000000072759576141825909033203125

0 50m 100m 1:0.000000000363797880709129545451015625

0 50m 100m 1:0.0000000001818989403545647727265625

0 50m 100m 1:0.00000000009094947017728238636328125

0 50m 100m 1:0.000000000045474735088643119181640625

0 50m 100m 1:0.0000000000227373675443215595908203125

0 50m 100m 1:0.00000000001136868377221577979791015625

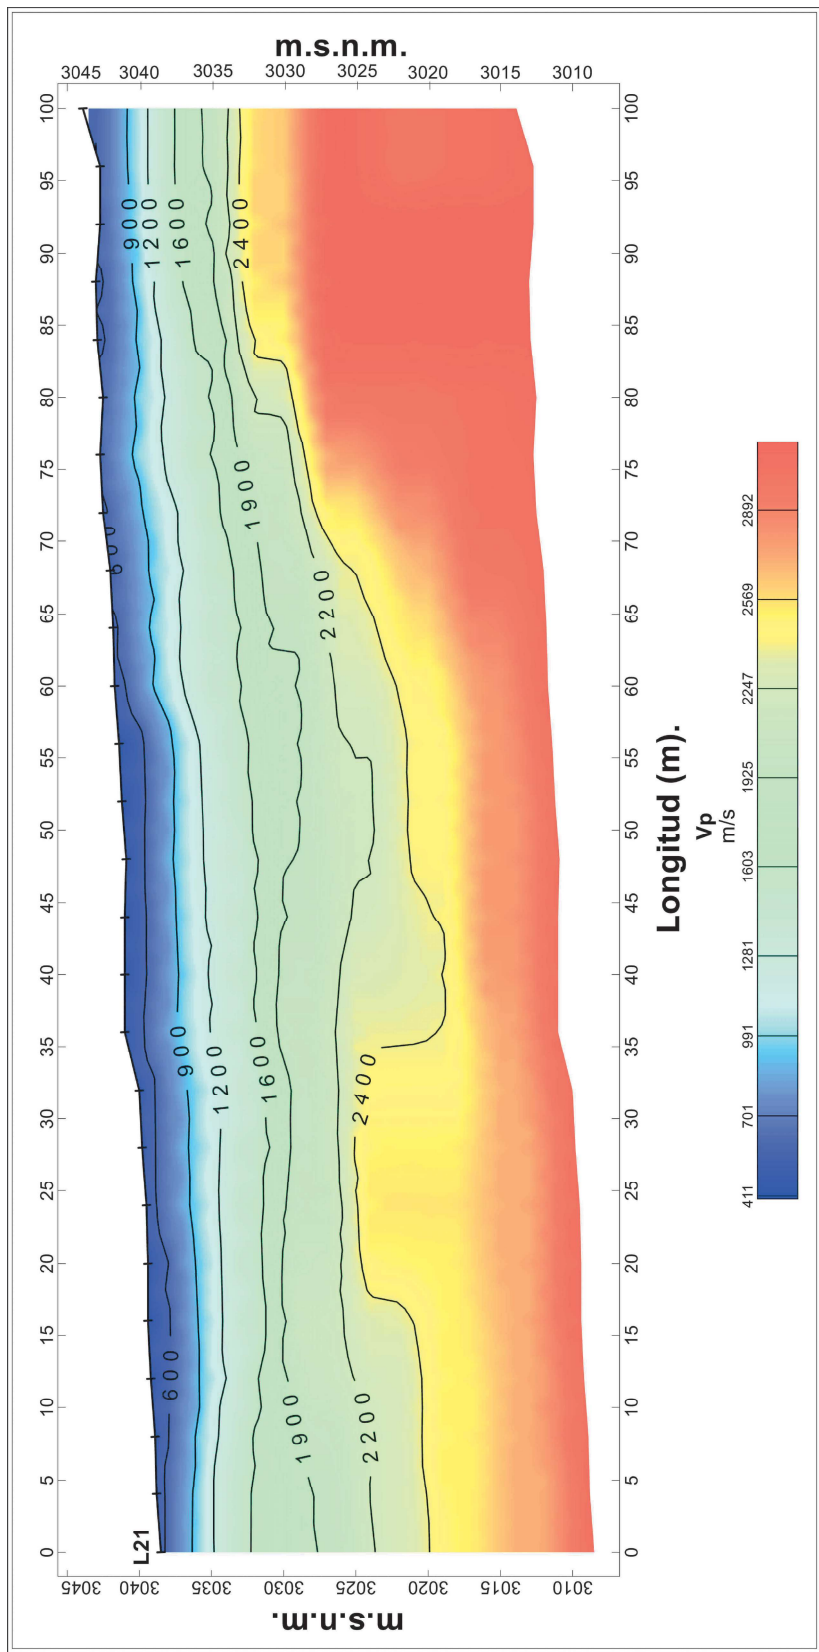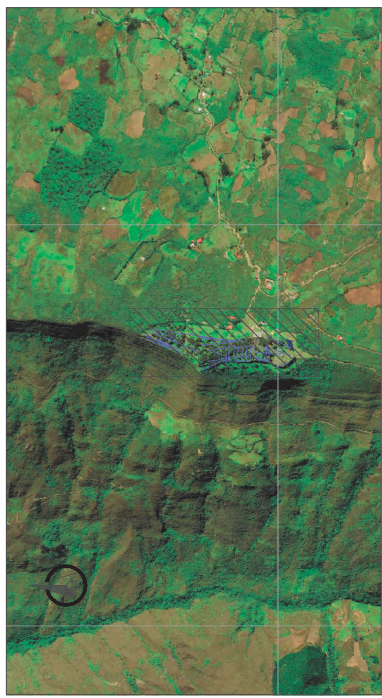

PLANO DE LOCALIZACIÓN DEL PROYECTO  
ESCALA 1/1000

| CUADRO DE COORDENADAS |           |            |           |            |        |           |            |           |            |        |           |
|-----------------------|-----------|------------|-----------|------------|--------|-----------|------------|-----------|------------|--------|-----------|
| Código                | Inicio    | Este       | Norte     | Fin        | Código | Inicio    | Este       | Norte     | Fin        | Código | Inicio    |
| LS-01                 | 176486.00 | 9289459.00 | 176469.25 | 9289506.11 | LS-21  | 176548.00 | 9289661.00 | 176529.83 | 9289759.34 | LS-41  | 176514.00 |
| LS-02                 | 176486.00 | 9289532.00 | 176497.63 | 9289580.63 | LS-22  | 176558.00 | 9289685.00 | 176576.43 | 9289783.95 | LS-42  | 176518.00 |
| LS-03                 | 176490.00 | 9289506.00 | 176491.08 | 9289705.99 | LS-23  | 176558.00 | 9289685.00 | 176551.15 | 9289784.77 | LS-43  | 176518.00 |
| LS-04                 | 176496.00 | 9289596.00 | 176458.48 | 9289787.42 | LS-24  | 176568.00 | 9289686.00 | 176581.56 | 9289785.08 | LS-44  | 176529.00 |
| LS-05                 | 176488.00 | 9289760.00 | 176508.23 | 9289662.07 | LS-25  | 176575.00 | 9289635.00 | 176564.60 | 9289683.91 | LS-45  | 176513.00 |
| LS-06                 | 176504.00 | 9289556.00 | 176510.20 | 9289606.39 | LS-26  | 176585.00 | 9289630.00 | 176562.01 | 9289679.91 | LS-46  | 176529.00 |
| LS-07                 | 176504.00 | 9289587.00 | 176495.24 | 9289537.46 | LS-27  | 176595.00 | 9289611.00 | 176541.44 | 9289660.87 | LS-47  | 176536.00 |
| LS-08                 | 176486.00 | 9289531.00 | 176535.99 | 9289534.02 | LS-28  | 176595.00 | 9289611.00 | 176572.96 | 9289994.92 | LS-48  | 176546.00 |
| LS-09                 | 176491.00 | 9289547.00 | 176540.68 | 9289541.36 | LS-29  | 176542.00 | 9289903.00 | 176587.25 | 9289921.18 | LS-49  | 176550.00 |
| LS-10                 | 176494.00 | 9289565.00 | 176541.74 | 9289550.15 | LS-30  | 176542.00 | 9289903.00 | 176580.89 | 9289991.44 | LS-50  | 176550.00 |
| LS-11                 | 176495.00 | 9289580.00 | 176544.69 | 9289574.48 | LS-31  | 176545.00 | 9289861.00 | 176571.53 | 9289946.09 | LS-51  | 176531.00 |
| LS-12                 | 176521.00 | 9289591.00 | 176570.03 | 9289581.19 | LS-32  | 176555.00 | 9289865.00 | 176559.99 | 9289961.83 | LS-52  | 176531.00 |
| LS-13                 | 176498.00 | 9289502.00 | 176547.96 | 9289604.04 | LS-33  | 176565.00 | 9289875.00 | 176595.27 | 9289966.50 | LS-53  | 176535.00 |
| LS-14                 | 176490.00 | 9289521.00 | 176538.89 | 9289617.75 | LS-34  | 176575.00 | 9289881.00 | 176607.47 | 9289976.65 | LS-54  | 176519.00 |
| LS-15                 | 176490.00 | 9289538.00 | 176539.29 | 9289629.61 | LS-35  | 176610.00 | 9289955.00 | 176589.96 | 9289957.03 | LS-55  | 176483.00 |
| LS-16                 | 176492.00 | 9289553.00 | 176541.75 | 9289648.03 | LS-36  | 176610.00 | 9289955.00 | 176589.96 | 9289957.03 | LS-56  | 176483.00 |
| LS-17                 | 176497.00 | 9289569.00 | 176546.37 | 9289661.10 | LS-37  | 176610.00 | 9289955.00 | 176589.96 | 9289957.03 | LS-57  | 176483.00 |
| LS-18                 | 176495.00 | 9289585.00 | 176544.92 | 9289662.33 | LS-38  | 176610.00 | 9289955.00 | 176589.96 | 9289957.03 | LS-58  | 176483.00 |
| LS-19                 | 176497.00 | 9289593.00 | 176546.81 | 9289667.33 | LS-39  | 176610.00 | 9289955.00 | 176589.96 | 9289957.03 | LS-59  | 176483.00 |
| LS-20                 | 176512.00 | 9289705.00 | 176530.40 | 9289751.49 | LS-40  | 176572.00 | 9289738.00 | 176591.62 | 9289836.25 | LS-60  | 176531.00 |

CONFIDENCIAL

NOTAS:  
1. LA INFORMACIÓN TOPOGRÁFICA ESTÁ EN EL SISTEMA UTM WGS84, ZONA 18 SUR.  
2. LAS ELEVACIONES SON EN METROS.  
3. LAS ELEVACIONES SON EN METROS.  
4. LAS ELEVACIONES SON EN METROS.

DOCUMENTOS DE REFERENCIA

REVISIONES

CLIENTE:

PROYECTO:

CONTRATACIÓN DE SERVICIO PARA LA DETERMINACIÓN DE LA ESTRATIGRAFÍA DE ÁREA NUCLEAR DE LA ZONA ARQUEOLÓGICA MONUMENTAL DE KUÉLAP

NUMERO DE CONTRATO: Nº 030-2023-OGA-SG/MC

TÍTULO:

PLANO DE PERFILES SÍSMICOS

ESCALA:

GRÁFICA

PLANO Nº:

LS-21

REV:

A





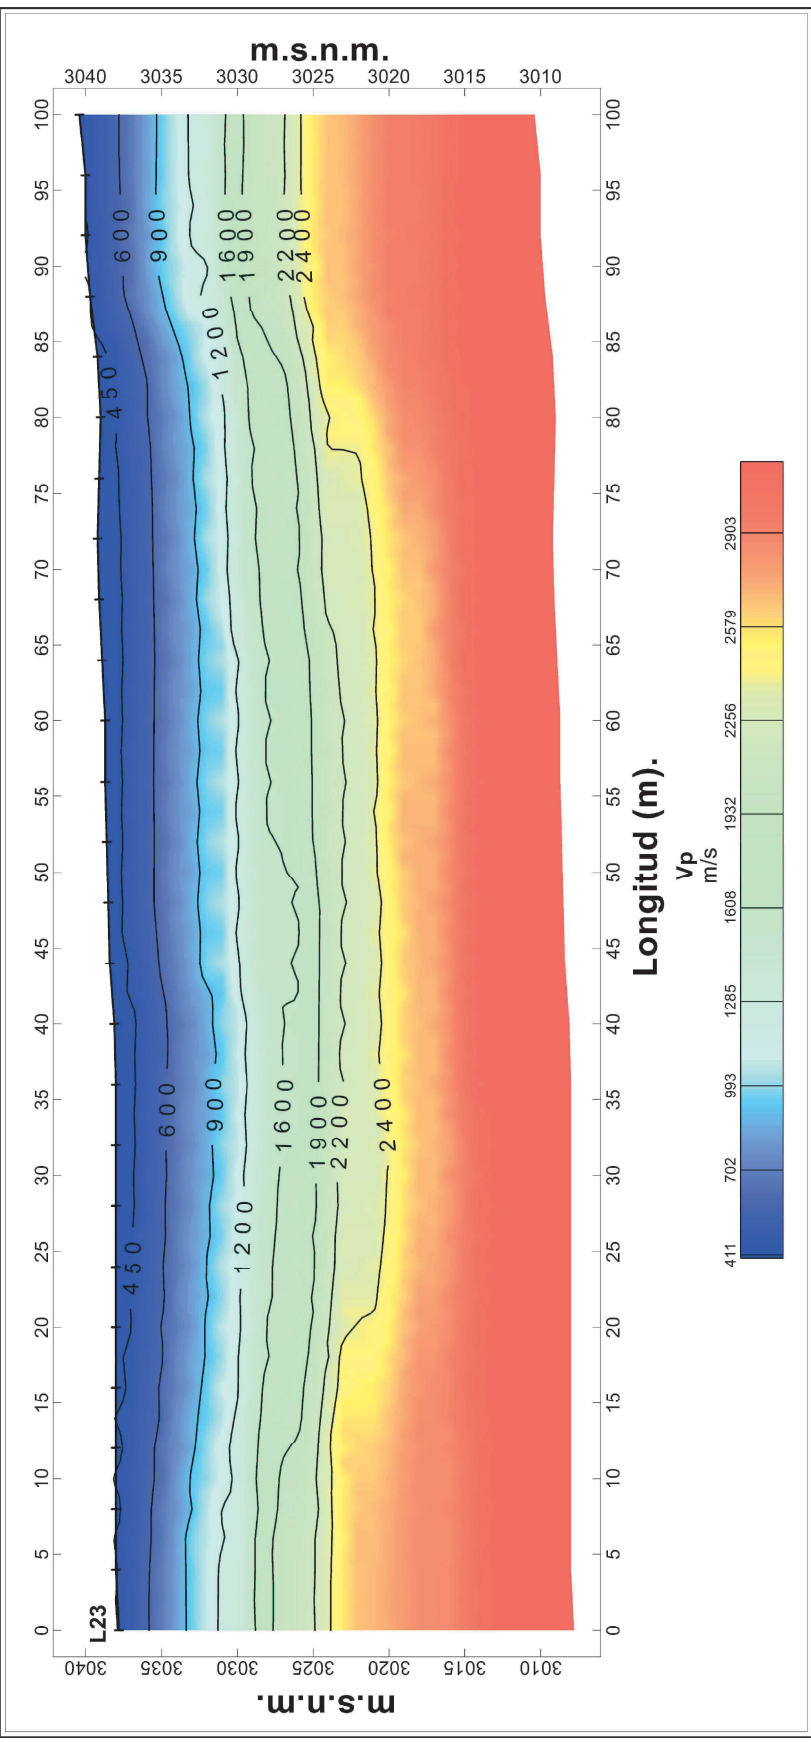

PLANO DE LOCALIZACIÓN DEL PROYECTO  
ESCALA 1/1000

| CONFIDENCIAL                                                                                                                                                                                                                                  |  | NOTAS                                                                                                                                                                                                           | DOCUMENTOS DE REFERENCIA |             | REVISIONES |       |             |                       |          |          | CLIENTE: | PROYECTO:                                                                           |                                                                                                                                                                               |         |
|-----------------------------------------------------------------------------------------------------------------------------------------------------------------------------------------------------------------------------------------------|--|-----------------------------------------------------------------------------------------------------------------------------------------------------------------------------------------------------------------|--------------------------|-------------|------------|-------|-------------|-----------------------|----------|----------|----------|-------------------------------------------------------------------------------------|-------------------------------------------------------------------------------------------------------------------------------------------------------------------------------|---------|
| ESTE PLANO LA INFORMACION CONTIENE LA INFORMACION DEL CLIENTE, SU USO SIN PREVISIÓN DE RESPONSABILIDAD POR LOS DATOS CONTENIDOS EN ESTE PLANO, NO GARANTIZA LA EXCLUSIVA DEL USUARIO SIN NINGUNA RESPONSABILIDAD LEGAL POR PARTE DEL CLIENTE. |  | 1. LA INFORMACIÓN TOPOGRÁFICA ESTÁ EN EL SISTEMA UTM NOROCCIDENTAL, ZONA 18 SUR. EL DATUM ES EL DATUM DE SAN MARCOS. LAS ALTURAS EN LAS IMAGENES SE ENCONTRARON EN LAS ESCALAS MOSTRADAS ES PARA EL FORMATO A1. | REV.                     | DESCRIPCIÓN | REV.       | FECHA | DESCRIPCIÓN | DEBILLO               | PREPARO  | APROBÓ   | AUTORIZO |  | CONTRATACIÓN DE SERVICIO PARA LA DETERMINACIÓN DE LA ESTRATIGRAFÍA DEL ÁREA NUCLEAR DE LA ZONA ARQUEOLÓGICA MONUMENTAL DE KUÉLAP<br>NUMERO DE CONTRATO: Nº 030-2023-OGA-SG/MC |         |
|                                                                                                                                                                                                                                               |  | 2. LA LINDA PARA LAS DIMENSIONES ES EN METROS Y CENTÍMETROS.                                                                                                                                                    | A                        |             |            |       | 04.07.23    | EMITIDO PARA REVISIÓN | S-BLANCO | S-BLANCO | N. MORI  |                                                                                     |                                                                                                                                                                               | N. MORI |
|                                                                                                                                                                                                                                               |  | 3. LAS ESCALAS MOSTRADAS ES PARA EL FORMATO A1.                                                                                                                                                                 |                          |             |            |       |             |                       |          |          |          |                                                                                     |                                                                                                                                                                               |         |
|                                                                                                                                                                                                                                               |  |                                                                                                                                                                                                                 |                          |             |            |       |             |                       |          |          |          |                                                                                     |                                                                                                                                                                               |         |
|                                                                                                                                                                                                                                               |  |                                                                                                                                                                                                                 |                          |             |            |       |             |                       |          |          |          |                                                                                     |                                                                                                                                                                               |         |
|                                                                                                                                                                                                                                               |  |                                                                                                                                                                                                                 |                          |             |            |       |             |                       |          |          |          |                                                                                     |                                                                                                                                                                               |         |
|                                                                                                                                                                                                                                               |  |                                                                                                                                                                                                                 |                          |             |            |       |             |                       |          |          |          |                                                                                     |                                                                                                                                                                               |         |
|                                                                                                                                                                                                                                               |  |                                                                                                                                                                                                                 |                          |             |            |       |             |                       |          |          |          |                                                                                     | TÍTULO: PLANO DE PERFILES SÍSMICOS                                                                                                                                            |         |
|                                                                                                                                                                                                                                               |  |                                                                                                                                                                                                                 |                          |             |            |       |             |                       |          |          |          |                                                                                     | CONSULTOR: Ing. Nilsson Mori Sánchez<br>CIP 175217                                                                                                                            |         |
|                                                                                                                                                                                                                                               |  |                                                                                                                                                                                                                 |                          |             |            |       |             |                       |          |          |          |                                                                                     | ESCALA: GRAFICA                                                                                                                                                               |         |
|                                                                                                                                                                                                                                               |  |                                                                                                                                                                                                                 |                          |             |            |       |             |                       |          |          |          |                                                                                     | ESTUDIOS DE GEOFÍSICA                                                                                                                                                         |         |
|                                                                                                                                                                                                                                               |  |                                                                                                                                                                                                                 |                          |             |            |       |             |                       |          |          |          |                                                                                     | PLANO Nº: LS-23                                                                                                                                                               |         |
|                                                                                                                                                                                                                                               |  |                                                                                                                                                                                                                 |                          |             |            |       |             |                       |          |          |          |                                                                                     | REVISIÓN: A                                                                                                                                                                   |         |

| CUADRO DE COORDENADAS |           |            |           |            |     |       |           |            |           |            |       |       |           |            |           |            |     |
|-----------------------|-----------|------------|-----------|------------|-----|-------|-----------|------------|-----------|------------|-------|-------|-----------|------------|-----------|------------|-----|
| Código                | Inicio    |            |           | Fin        |     |       | Longitud  | Código     | Inicio    |            |       | Fin   |           |            | Longitud  |            |     |
|                       | Este      | Norte      | Este      | Norte      | Fin | Este  |           |            | Norte     | Este       | Norte | Fin   |           |            |           |            |     |
| LS-01                 | 176486.00 | 9289459.00 | 176469.25 | 9289506.11 | 50  | LS-21 | 176548.00 | 9289661.00 | 176529.83 | 9289759.34 | 100   | LS-41 | 176468.00 | 9289761.00 | 176514.00 | 9289851.00 | 100 |
| LS-02                 | 176486.00 | 9289532.00 | 176497.63 | 9289590.63 | 50  | LS-22 | 176558.00 | 9289685.00 | 176551.43 | 9289783.95 | 100   | LS-42 | 176505.00 | 9289752.00 | 176518.00 | 9289847.00 | 100 |
| LS-03                 | 176490.00 | 9289506.00 | 176491.08 | 9289705.99 | 100 | LS-23 | 176562.00 | 9289685.00 | 176565.15 | 9289784.77 | 100   | LS-43 | 176518.00 | 9289756.00 | 176527.00 | 9289847.00 | 100 |
| LS-04                 | 176496.00 | 9289596.00 | 176455.48 | 9289787.42 | 100 | LS-24 | 176568.00 | 9289686.00 | 176581.56 | 9289785.08 | 100   | LS-44 | 176504.00 | 9289749.00 | 176529.00 | 9289845.00 | 100 |
| LS-05                 | 176488.00 | 9289760.00 | 176508.23 | 9289662.07 | 100 | LS-25 | 176575.00 | 9289635.00 | 176564.60 | 9289883.91 | 50    | LS-45 | 176516.00 | 9289744.00 | 176513.00 | 9289845.00 | 100 |
| LS-06                 | 176504.00 | 9289556.00 | 176510.20 | 9289666.39 | 50  | LS-26 | 176566.00 | 9289635.00 | 176562.01 | 9289675.91 | 50    | LS-46 | 176552.00 | 9289829.00 | 176504.00 | 9289945.00 | 100 |
| LS-07                 | 176502.00 | 9289587.00 | 176495.24 | 9289537.46 | 50  | LS-27 | 176545.00 | 9289611.00 | 176541.44 | 9289660.87 | 50    | LS-47 | 176586.00 | 9289869.00 | 176599.00 | 9289967.00 | 100 |
| LS-08                 | 176486.00 | 9289531.00 | 176535.99 | 9289534.02 | 50  | LS-28 | 176536.00 | 9289502.00 | 176572.96 | 9289594.92 | 100   | LS-48 | 176567.00 | 9289775.00 | 176594.46 | 9289870.29 | 100 |
| LS-09                 | 176491.00 | 9289547.00 | 176540.68 | 9289541.36 | 50  | LS-29 | 176542.00 | 9289503.00 | 176587.25 | 9289592.18 | 100   | LS-49 | 176550.00 | 9289797.00 | 176577.00 | 9289866.00 | 100 |
| LS-10                 | 176494.00 | 9289565.00 | 176541.74 | 9289550.15 | 50  | LS-30 | 176542.00 | 9289503.00 | 176587.25 | 9289594.09 | 100   | LS-50 | 176554.00 | 9289769.00 | 176579.00 | 9289842.00 | 100 |
| LS-11                 | 176495.00 | 9289580.00 | 176544.69 | 9289574.48 | 50  | LS-31 | 176551.00 | 9289861.00 | 176571.53 | 9289594.09 | 100   | LS-51 | 176533.00 | 9289756.00 | 176565.00 | 9289845.00 | 100 |
| LS-12                 | 176521.00 | 9289591.00 | 176570.03 | 9289581.19 | 50  | LS-32 | 176555.00 | 9289865.00 | 176599.99 | 9289596.83 | 100   | LS-52 | 176533.00 | 9289760.00 | 176593.00 | 9289830.00 | 100 |
| LS-13                 | 176498.00 | 9289502.00 | 176547.96 | 9289604.04 | 50  | LS-33 | 176566.00 | 9289875.00 | 176595.47 | 9289596.50 | 100   | LS-53 | 176585.00 | 9289597.00 | 176542.00 | 9289858.00 | 100 |
| LS-14                 | 176490.00 | 9289521.00 | 176538.89 | 9289617.75 | 50  | LS-34 | 176575.00 | 9289881.00 | 176607.27 | 9289597.65 | 100   | LS-54 | 176519.00 | 9289586.00 | 176536.00 | 9289858.00 | 100 |
| LS-15                 | 176490.00 | 9289538.00 | 176539.29 | 9289629.61 | 50  | LS-35 | 176510.00 | 9289955.00 | 176589.96 | 9289857.03 | 100   | LS-55 | 176483.00 | 9289519.00 | 176536.00 | 9289590.00 | 100 |
| LS-16                 | 176492.00 | 9289553.00 | 176541.75 | 9289648.03 | 50  | LS-36 | 176510.00 | 9289452.00 | 176546.40 | 9289545.14 | 100   | LS-56 | 176564.00 | 9289512.00 | 176502.00 | 9289584.00 | 100 |
| LS-17                 | 176497.00 | 9289569.00 | 176546.37 | 9289661.10 | 50  | LS-37 | 176517.00 | 9289485.00 | 176584.51 | 9289541.04 | 100   | LS-57 | 176564.00 | 9289640.00 | 176501.00 | 9289559.00 | 100 |
| LS-18                 | 176495.00 | 9289585.00 | 176544.92 | 9289682.33 | 50  | LS-38 | 176517.00 | 9289485.00 | 176584.51 | 9289541.04 | 100   | LS-58 | 176493.00 | 9289472.00 | 176506.00 | 9289573.00 | 100 |
| LS-19                 | 176497.00 | 9289593.00 | 176546.81 | 9289697.33 | 50  | LS-39 | 176527.00 | 9289603.00 | 176588.16 | 9289594.14 | 100   | LS-59 | 176468.00 | 9289457.00 | 176495.00 | 9289572.00 | 100 |
| LS-20                 | 176512.00 | 9289705.00 | 176530.40 | 9289751.49 | 50  | LS-40 | 176527.00 | 9289738.00 | 176591.62 | 9289598.25 | 100   | LS-60 | 176531.00 | 9289490.00 | 176545.00 | 9289594.00 | 100 |



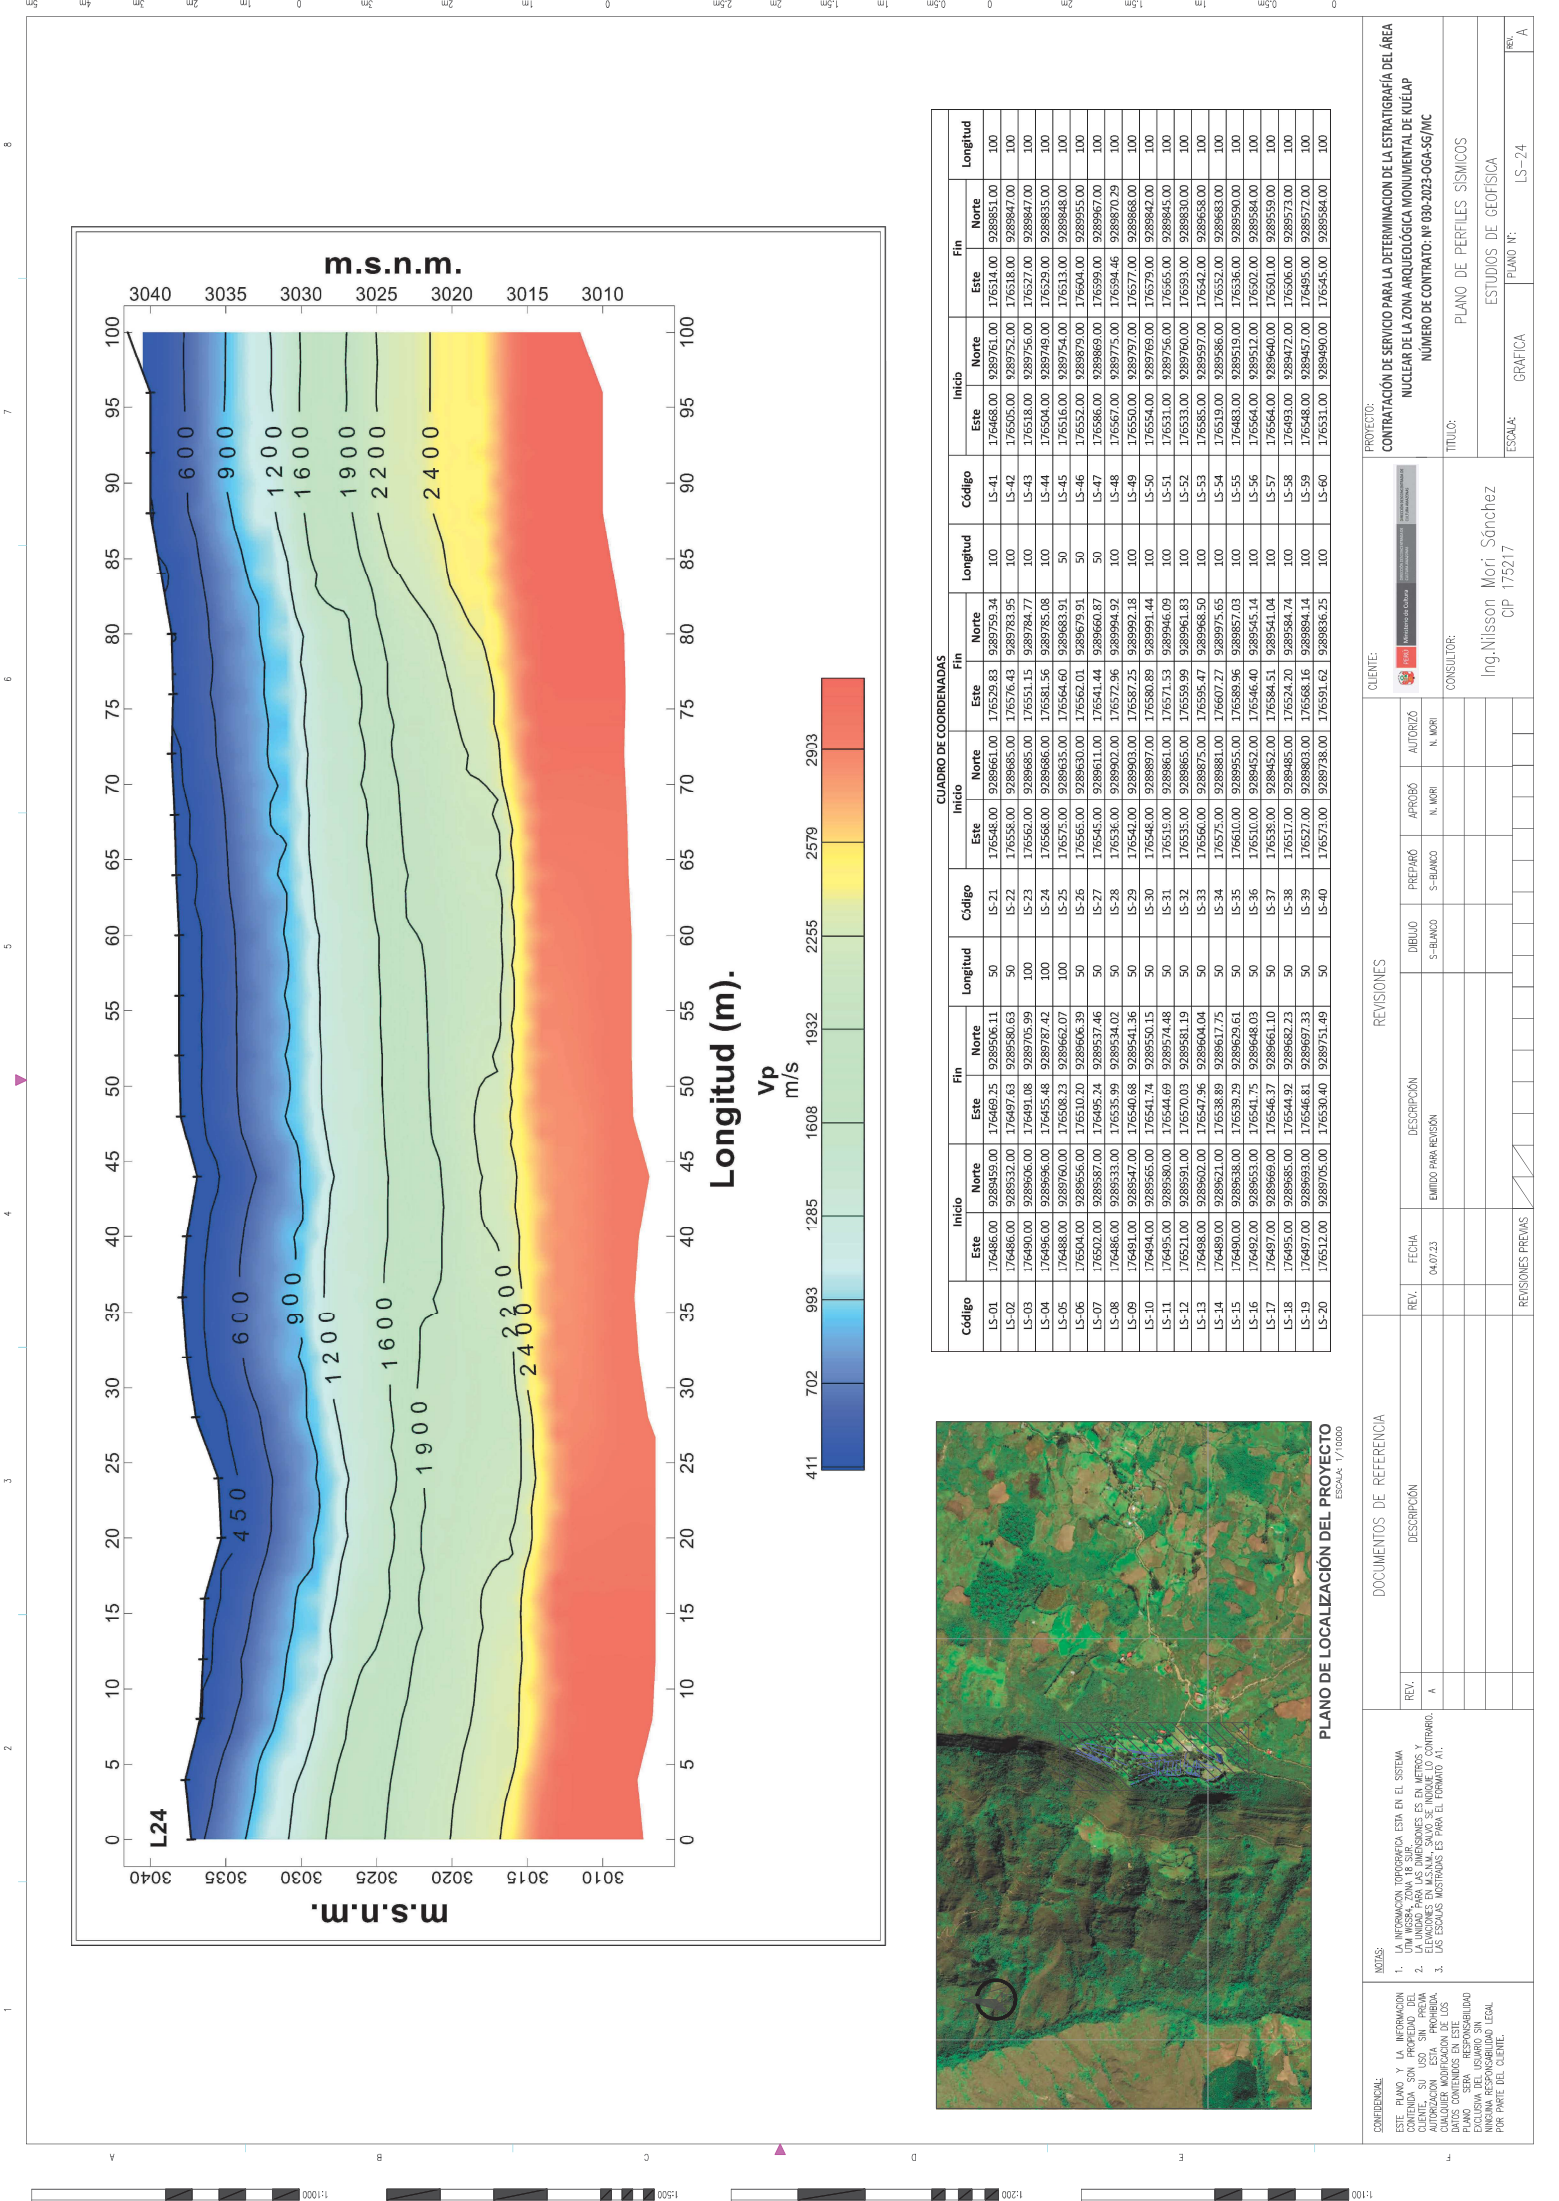

PLANO DE LOCALIZACIÓN DEL PROYECTO  
Escala 1:10000

| CUADRO DE COORDENADAS |           |            |           |            |        |        |           |            |           |            |        |       |           |            |           |            |     |
|-----------------------|-----------|------------|-----------|------------|--------|--------|-----------|------------|-----------|------------|--------|-------|-----------|------------|-----------|------------|-----|
| Código                | Inicio    |            | Fin       |            | Código | Inicio |           | Fin        |           | Código     | Inicio |       | Fin       |            | Longitud  |            |     |
|                       | Este      | Norte      | Este      | Norte      |        | Este   | Norte     | Este       | Norte     |            | Este   | Norte | Este      | Norte      |           |            |     |
| LS-01                 | 176486.00 | 9289459.00 | 176469.25 | 9289506.11 | 50     | LS-21  | 176546.00 | 9289661.00 | 176529.83 | 9289759.34 | 100    | LS-41 | 176486.00 | 9289761.00 | 176514.00 | 9289851.00 | 100 |
| LS-02                 | 176486.00 | 9289532.00 | 176497.63 | 9289580.63 | 50     | LS-22  | 176556.00 | 9289685.00 | 176576.43 | 9289783.95 | 100    | LS-42 | 176505.00 | 9289756.00 | 176521.00 | 9289847.00 | 100 |
| LS-03                 | 176490.00 | 9289506.00 | 176491.08 | 9289705.99 | 100    | LS-23  | 176566.00 | 9289686.00 | 176581.56 | 9289785.08 | 100    | LS-43 | 176518.00 | 9289756.00 | 176527.00 | 9289847.00 | 100 |
| LS-04                 | 176496.00 | 9289596.00 | 176455.48 | 9289787.42 | 100    | LS-24  | 176566.00 | 9289686.00 | 176581.56 | 9289785.08 | 100    | LS-44 | 176504.00 | 9289749.00 | 176529.00 | 9289848.00 | 100 |
| LS-05                 | 176488.00 | 9289760.00 | 176508.23 | 9289662.07 | 100    | LS-25  | 176576.00 | 9289635.00 | 176564.60 | 9289683.91 | 50     | LS-45 | 176516.00 | 9289754.00 | 176531.00 | 9289848.00 | 100 |
| LS-06                 | 176504.00 | 9289556.00 | 176510.20 | 9289606.39 | 50     | LS-26  | 176576.00 | 9289635.00 | 176562.01 | 9289679.87 | 50     | LS-46 | 176552.00 | 9289829.00 | 176504.00 | 9289855.00 | 100 |
| LS-07                 | 176502.00 | 9289587.00 | 176495.24 | 9289537.46 | 50     | LS-27  | 176546.00 | 9289611.00 | 176541.44 | 9289669.81 | 50     | LS-47 | 176586.00 | 9289869.00 | 176504.00 | 9289867.00 | 100 |
| LS-08                 | 176486.00 | 9289531.00 | 176535.99 | 9289534.02 | 50     | LS-28  | 176536.00 | 9289502.00 | 176572.96 | 9289694.92 | 100    | LS-48 | 176567.00 | 9289775.00 | 176546.00 | 9289879.00 | 100 |
| LS-09                 | 176491.00 | 9289547.00 | 176540.68 | 9289541.36 | 50     | LS-29  | 176542.00 | 9289503.00 | 176587.25 | 9289901.18 | 100    | LS-49 | 176550.00 | 9289797.00 | 176577.00 | 9289868.00 | 100 |
| LS-10                 | 176494.00 | 9289565.00 | 176541.74 | 9289550.15 | 50     | LS-30  | 176542.00 | 9289503.00 | 176580.89 | 9289901.44 | 100    | LS-50 | 176554.00 | 9289769.00 | 176579.00 | 9289862.00 | 100 |
| LS-11                 | 176495.00 | 9289580.00 | 176544.69 | 9289574.48 | 50     | LS-31  | 176545.00 | 9289861.00 | 176571.53 | 9289946.09 | 100    | LS-51 | 176531.00 | 9289756.00 | 176555.00 | 9289864.00 | 100 |
| LS-12                 | 176521.00 | 9289591.00 | 176570.03 | 9289581.19 | 50     | LS-32  | 176555.00 | 9289865.00 | 176559.99 | 9289968.50 | 100    | LS-52 | 176533.00 | 9289760.00 | 176555.00 | 9289863.00 | 100 |
| LS-13                 | 176498.00 | 9289502.00 | 176547.96 | 9289604.04 | 50     | LS-33  | 176566.00 | 9289875.00 | 176595.47 | 9289968.50 | 100    | LS-53 | 176585.00 | 9289597.00 | 176542.00 | 9289863.00 | 100 |
| LS-14                 | 176489.00 | 9289521.00 | 176538.89 | 9289617.75 | 50     | LS-34  | 176576.00 | 9289881.00 | 176607.27 | 9289975.65 | 100    | LS-54 | 176519.00 | 9289586.00 | 176525.00 | 9289863.00 | 100 |
| LS-15                 | 176490.00 | 9289538.00 | 176539.29 | 9289629.61 | 50     | LS-35  | 176510.00 | 9289955.00 | 176589.96 | 9289857.03 | 100    | LS-55 | 176483.00 | 9289519.00 | 176536.00 | 9289859.00 | 100 |
| LS-16                 | 176492.00 | 9289553.00 | 176541.75 | 9289648.03 | 50     | LS-36  | 176510.00 | 9289452.00 | 176546.40 | 9289545.14 | 100    | LS-56 | 176564.00 | 9289512.00 | 176502.00 | 9289859.00 | 100 |
| LS-17                 | 176497.00 | 9289569.00 | 176546.37 | 9289661.10 | 50     | LS-37  | 176537.00 | 9289452.00 | 176584.51 | 9289541.04 | 100    | LS-57 | 176564.00 | 9289640.00 | 176502.00 | 9289859.00 | 100 |
| LS-18                 | 176495.00 | 9289585.00 | 176544.92 | 9289682.33 | 50     | LS-38  | 176551.00 | 9289485.00 | 176524.20 | 9289584.74 | 100    | LS-58 | 176493.00 | 9289472.00 | 176506.00 | 9289857.00 | 100 |
| LS-19                 | 176497.00 | 9289593.00 | 176546.81 | 9289697.33 | 50     | LS-39  | 176527.00 | 9289603.00 | 176588.16 | 9289684.14 | 100    | LS-59 | 176548.00 | 9289457.00 | 176509.00 | 9289857.00 | 100 |
| LS-20                 | 176512.00 | 9289705.00 | 176530.40 | 9289751.49 | 50     | LS-40  | 176577.00 | 9289738.00 | 176591.62 | 9289864.25 | 100    | LS-60 | 176531.00 | 9289490.00 | 176545.00 | 9289854.00 | 100 |

| CONFIDENCIAL | DOCUMENTOS DE REFERENCIA |          | REVISIONES            |          |          |         | CLIENTE  |                                         | PROYECTO                                                                                                                        |                                           |
|--------------|--------------------------|----------|-----------------------|----------|----------|---------|----------|-----------------------------------------|---------------------------------------------------------------------------------------------------------------------------------|-------------------------------------------|
|              | REV.                     | FECHA    | DESCRIPCIÓN           | DEBILLO  | PREPARO  | APROBÓ  | AUTORIZÓ | CONSULTOR                               | CONTRATACIÓN DE SERVICIO PARA LA DETERMINACIÓN DE LA ESTRATIGRAFÍA DE ÁREA NUCLEAR DE LA ZONA ARQUEOLÓGICA MONUMENTAL DE KUÉLAP | NÚMERO DE CONTRATO: Nº 030-2023-OGA-SG/MC |
|              | A                        | 04/07/23 | EMITIDO PARA REVISIÓN | S-BLANCO | S-BLANCO | N. MORI | N. MORI  |                                         |                                                                                                                                 |                                           |
|              |                          |          |                       |          |          |         |          | Ing. Nilsson Mori Sánchez<br>CIP 175217 | PLANO DE PERFILES SÍSMICOS                                                                                                      | ESTUDIOS DE GEOFÍSICA                     |
|              |                          |          |                       |          |          |         |          |                                         |                                                                                                                                 |                                           |
|              |                          |          |                       |          |          |         |          |                                         |                                                                                                                                 |                                           |
|              |                          |          |                       |          |          |         |          | ESCALA: GRAFICA                         | PLANO Nº:                                                                                                                       | LS-24                                     |
|              |                          |          |                       |          |          |         |          |                                         |                                                                                                                                 |                                           |





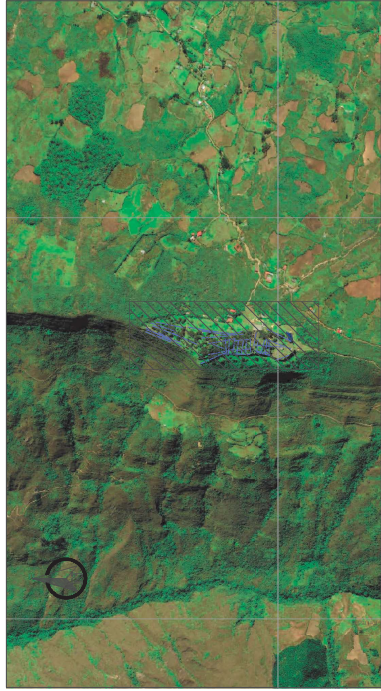

ESCALA: 1/10000

|                                                                                                                                                                                                                                                                                                 |  |                                                                                                                                                                                                                |  |                          |  |                        |  |          |  |          |           |            |  |
|-------------------------------------------------------------------------------------------------------------------------------------------------------------------------------------------------------------------------------------------------------------------------------------------------|--|----------------------------------------------------------------------------------------------------------------------------------------------------------------------------------------------------------------|--|--------------------------|--|------------------------|--|----------|--|----------|-----------|------------|--|
| CONFIDENCIAL                                                                                                                                                                                                                                                                                    |  | NOTAS                                                                                                                                                                                                          |  | DOCUMENTOS DE REFERENCIA |  | REVISIONES             |  |          |  | CLIENTE: | PROYECTO: |            |  |
| ESTE PLANO Y LA INFORMACION QUE CONTIENE SON PROPIEDAD DE LA EMPRESA AUTORIZADA PARA SU USO. SIN PERMISO POR ESCRITO, LA AUTORIZACION ESTA PROHIBIDA. LA INFORMACION DE LOS DATOS CONTENIDOS EN ESTE PLANO NO SERA RESPONSABILIDAD DE LA EMPRESA NINGUNA RESPONSABILIDAD POR PARTE DEL CLIENTE. |  | 1. LA INFORMACION TOPOGRAFICA ESTA EN EL SISTEMA UTM, ZONA 18Q, DATUM 1984, UNIDADES EN METROS Y MM.<br>2. LA UNIDAD PARA LAS DIMENSIONES ES EN METROS Y MM.<br>3. LAS ESCALAS MOSTRAN LAS PARA EL FORMATO A1. |  | REV. DESCRIPCION         |  | REV. FECHA DESCRIPCION |  | DEBIDO   |  | APROBADO |           | AUTORIZADO |  |
|                                                                                                                                                                                                                                                                                                 |  | A                                                                                                                                                                                                              |  |                          |  | 04/07/23               |  | 5-BLANCO |  | N-MORI   |           | N-MORI     |  |
|                                                                                                                                                                                                                                                                                                 |  |                                                                                                                                                                                                                |  |                          |  |                        |  |          |  |          |           |            |  |
|                                                                                                                                                                                                                                                                                                 |  |                                                                                                                                                                                                                |  |                          |  |                        |  |          |  |          |           |            |  |
|                                                                                                                                                                                                                                                                                                 |  |                                                                                                                                                                                                                |  |                          |  |                        |  |          |  |          |           |            |  |
|                                                                                                                                                                                                                                                                                                 |  |                                                                                                                                                                                                                |  |                          |  | REVISIONES PREVIAS     |  |          |  |          |           |            |  |
|                                                                                                                                                                                                                                                                                                 |  |                                                                                                                                                                                                                |  |                          |  |                        |  |          |  |          |           |            |  |
|                                                                                                                                                                                                                                                                                                 |  |                                                                                                                                                                                                                |  |                          |  |                        |  |          |  |          |           |            |  |
|                                                                                                                                                                                                                                                                                                 |  |                                                                                                                                                                                                                |  |                          |  |                        |  |          |  |          |           |            |  |
|                                                                                                                                                                                                                                                                                                 |  |                                                                                                                                                                                                                |  |                          |  |                        |  |          |  |          |           |            |  |
|                                                                                                                                                                                                                                                                                                 |  |                                                                                                                                                                                                                |  |                          |  |                        |  |          |  |          |           |            |  |
|                                                                                                                                                                                                                                                                                                 |  |                                                                                                                                                                                                                |  |                          |  |                        |  |          |  |          |           |            |  |
|                                                                                                                                                                                                                                                                                                 |  |                                                                                                                                                                                                                |  |                          |  |                        |  |          |  |          |           |            |  |
|                                                                                                                                                                                                                                                                                                 |  |                                                                                                                                                                                                                |  |                          |  |                        |  |          |  |          |           |            |  |
|                                                                                                                                                                                                                                                                                                 |  |                                                                                                                                                                                                                |  |                          |  |                        |  |          |  |          |           |            |  |
|                                                                                                                                                                                                                                                                                                 |  |                                                                                                                                                                                                                |  |                          |  |                        |  |          |  |          |           |            |  |
|                                                                                                                                                                                                                                                                                                 |  |                                                                                                                                                                                                                |  |                          |  |                        |  |          |  |          |           |            |  |
|                                                                                                                                                                                                                                                                                                 |  |                                                                                                                                                                                                                |  |                          |  |                        |  |          |  |          |           |            |  |
|                                                                                                                                                                                                                                                                                                 |  |                                                                                                                                                                                                                |  |                          |  |                        |  |          |  |          |           |            |  |
|                                                                                                                                                                                                                                                                                                 |  |                                                                                                                                                                                                                |  |                          |  |                        |  |          |  |          |           |            |  |
|                                                                                                                                                                                                                                                                                                 |  |                                                                                                                                                                                                                |  |                          |  |                        |  |          |  |          |           |            |  |
|                                                                                                                                                                                                                                                                                                 |  |                                                                                                                                                                                                                |  |                          |  |                        |  |          |  |          |           |            |  |
|                                                                                                                                                                                                                                                                                                 |  |                                                                                                                                                                                                                |  |                          |  |                        |  |          |  |          |           |            |  |
|                                                                                                                                                                                                                                                                                                 |  |                                                                                                                                                                                                                |  |                          |  |                        |  |          |  |          |           |            |  |
|                                                                                                                                                                                                                                                                                                 |  |                                                                                                                                                                                                                |  |                          |  |                        |  |          |  |          |           |            |  |
|                                                                                                                                                                                                                                                                                                 |  |                                                                                                                                                                                                                |  |                          |  |                        |  |          |  |          |           |            |  |
|                                                                                                                                                                                                                                                                                                 |  |                                                                                                                                                                                                                |  |                          |  |                        |  |          |  |          |           |            |  |
|                                                                                                                                                                                                                                                                                                 |  |                                                                                                                                                                                                                |  |                          |  |                        |  |          |  |          |           |            |  |
|                                                                                                                                                                                                                                                                                                 |  |                                                                                                                                                                                                                |  |                          |  |                        |  |          |  |          |           |            |  |
|                                                                                                                                                                                                                                                                                                 |  |                                                                                                                                                                                                                |  |                          |  |                        |  |          |  |          |           |            |  |
|                                                                                                                                                                                                                                                                                                 |  |                                                                                                                                                                                                                |  |                          |  |                        |  |          |  |          |           |            |  |
|                                                                                                                                                                                                                                                                                                 |  |                                                                                                                                                                                                                |  |                          |  |                        |  |          |  |          |           |            |  |
|                                                                                                                                                                                                                                                                                                 |  |                                                                                                                                                                                                                |  |                          |  |                        |  |          |  |          |           |            |  |
|                                                                                                                                                                                                                                                                                                 |  |                                                                                                                                                                                                                |  |                          |  |                        |  |          |  |          |           |            |  |
|                                                                                                                                                                                                                                                                                                 |  |                                                                                                                                                                                                                |  |                          |  |                        |  |          |  |          |           |            |  |
|                                                                                                                                                                                                                                                                                                 |  |                                                                                                                                                                                                                |  |                          |  |                        |  |          |  |          |           |            |  |
|                                                                                                                                                                                                                                                                                                 |  |                                                                                                                                                                                                                |  |                          |  |                        |  |          |  |          |           |            |  |
|                                                                                                                                                                                                                                                                                                 |  |                                                                                                                                                                                                                |  |                          |  |                        |  |          |  |          |           |            |  |
|                                                                                                                                                                                                                                                                                                 |  |                                                                                                                                                                                                                |  |                          |  |                        |  |          |  |          |           |            |  |
|                                                                                                                                                                                                                                                                                                 |  |                                                                                                                                                                                                                |  |                          |  |                        |  |          |  |          |           |            |  |
|                                                                                                                                                                                                                                                                                                 |  |                                                                                                                                                                                                                |  |                          |  |                        |  |          |  |          |           |            |  |
|                                                                                                                                                                                                                                                                                                 |  |                                                                                                                                                                                                                |  |                          |  |                        |  |          |  |          |           |            |  |
|                                                                                                                                                                                                                                                                                                 |  |                                                                                                                                                                                                                |  |                          |  |                        |  |          |  |          |           |            |  |
|                                                                                                                                                                                                                                                                                                 |  |                                                                                                                                                                                                                |  |                          |  |                        |  |          |  |          |           |            |  |
|                                                                                                                                                                                                                                                                                                 |  |                                                                                                                                                                                                                |  |                          |  |                        |  |          |  |          |           |            |  |
|                                                                                                                                                                                                                                                                                                 |  |                                                                                                                                                                                                                |  |                          |  |                        |  |          |  |          |           |            |  |
|                                                                                                                                                                                                                                                                                                 |  |                                                                                                                                                                                                                |  |                          |  |                        |  |          |  |          |           |            |  |
|                                                                                                                                                                                                                                                                                                 |  |                                                                                                                                                                                                                |  |                          |  |                        |  |          |  |          |           |            |  |
|                                                                                                                                                                                                                                                                                                 |  |                                                                                                                                                                                                                |  |                          |  |                        |  |          |  |          |           |            |  |
|                                                                                                                                                                                                                                                                                                 |  |                                                                                                                                                                                                                |  |                          |  |                        |  |          |  |          |           |            |  |
|                                                                                                                                                                                                                                                                                                 |  |                                                                                                                                                                                                                |  |                          |  |                        |  |          |  |          |           |            |  |
|                                                                                                                                                                                                                                                                                                 |  |                                                                                                                                                                                                                |  |                          |  |                        |  |          |  |          |           |            |  |
|                                                                                                                                                                                                                                                                                                 |  |                                                                                                                                                                                                                |  |                          |  |                        |  |          |  |          |           |            |  |
|                                                                                                                                                                                                                                                                                                 |  |                                                                                                                                                                                                                |  |                          |  |                        |  |          |  |          |           |            |  |
|                                                                                                                                                                                                                                                                                                 |  |                                                                                                                                                                                                                |  |                          |  |                        |  |          |  |          |           |            |  |
|                                                                                                                                                                                                                                                                                                 |  |                                                                                                                                                                                                                |  |                          |  |                        |  |          |  |          |           |            |  |
|                                                                                                                                                                                                                                                                                                 |  |                                                                                                                                                                                                                |  |                          |  |                        |  |          |  |          |           |            |  |
|                                                                                                                                                                                                                                                                                                 |  |                                                                                                                                                                                                                |  |                          |  |                        |  |          |  |          |           |            |  |
|                                                                                                                                                                                                                                                                                                 |  |                                                                                                                                                                                                                |  |                          |  |                        |  |          |  |          |           |            |  |
|                                                                                                                                                                                                                                                                                                 |  |                                                                                                                                                                                                                |  |                          |  |                        |  |          |  |          |           |            |  |
|                                                                                                                                                                                                                                                                                                 |  |                                                                                                                                                                                                                |  |                          |  |                        |  |          |  |          |           |            |  |
|                                                                                                                                                                                                                                                                                                 |  |                                                                                                                                                                                                                |  |                          |  |                        |  |          |  |          |           |            |  |
|                                                                                                                                                                                                                                                                                                 |  |                                                                                                                                                                                                                |  |                          |  |                        |  |          |  |          |           |            |  |
|                                                                                                                                                                                                                                                                                                 |  |                                                                                                                                                                                                                |  |                          |  |                        |  |          |  |          |           |            |  |
|                                                                                                                                                                                                                                                                                                 |  |                                                                                                                                                                                                                |  |                          |  |                        |  |          |  |          |           |            |  |
|                                                                                                                                                                                                                                                                                                 |  |                                                                                                                                                                                                                |  |                          |  |                        |  |          |  |          |           |            |  |
|                                                                                                                                                                                                                                                                                                 |  |                                                                                                                                                                                                                |  |                          |  |                        |  |          |  |          |           |            |  |
|                                                                                                                                                                                                                                                                                                 |  |                                                                                                                                                                                                                |  |                          |  |                        |  |          |  |          |           |            |  |
|                                                                                                                                                                                                                                                                                                 |  |                                                                                                                                                                                                                |  |                          |  |                        |  |          |  |          |           |            |  |
|                                                                                                                                                                                                                                                                                                 |  |                                                                                                                                                                                                                |  |                          |  |                        |  |          |  |          |           |            |  |
|                                                                                                                                                                                                                                                                                                 |  |                                                                                                                                                                                                                |  |                          |  |                        |  |          |  |          |           |            |  |
|                                                                                                                                                                                                                                                                                                 |  |                                                                                                                                                                                                                |  |                          |  |                        |  |          |  |          |           |            |  |
|                                                                                                                                                                                                                                                                                                 |  |                                                                                                                                                                                                                |  |                          |  |                        |  |          |  |          |           |            |  |
|                                                                                                                                                                                                                                                                                                 |  |                                                                                                                                                                                                                |  |                          |  |                        |  |          |  |          |           |            |  |
|                                                                                                                                                                                                                                                                                                 |  |                                                                                                                                                                                                                |  |                          |  |                        |  |          |  |          |           |            |  |
|                                                                                                                                                                                                                                                                                                 |  |                                                                                                                                                                                                                |  |                          |  |                        |  |          |  |          |           |            |  |
|                                                                                                                                                                                                                                                                                                 |  |                                                                                                                                                                                                                |  |                          |  |                        |  |          |  |          |           |            |  |
|                                                                                                                                                                                                                                                                                                 |  |                                                                                                                                                                                                                |  |                          |  |                        |  |          |  |          |           |            |  |
|                                                                                                                                                                                                                                                                                                 |  |                                                                                                                                                                                                                |  |                          |  |                        |  |          |  |          |           |            |  |
|                                                                                                                                                                                                                                                                                                 |  |                                                                                                                                                                                                                |  |                          |  |                        |  |          |  |          |           |            |  |
|                                                                                                                                                                                                                                                                                                 |  |                                                                                                                                                                                                                |  |                          |  |                        |  |          |  |          |           |            |  |
|                                                                                                                                                                                                                                                                                                 |  |                                                                                                                                                                                                                |  |                          |  |                        |  |          |  |          |           |            |  |
|                                                                                                                                                                                                                                                                                                 |  |                                                                                                                                                                                                                |  |                          |  |                        |  |          |  |          |           |            |  |



---

|                                                                                                                                                                                                                                                                                                  |  |  |  |  |  |  |  |  |  |                                                                                                                                                                                                                                                                                                    |  |  |  |  |  |  |  |  |  |                                                                  |  |  |  |  |  |  |  |  |  |                                                          |  |  |  |  |  |  |  |  |  |                                         |  |  |  |  |  |  |  |  |  |                                                                                                                                                                               |  |  |  |  |  |  |  |  |  |                       |  |  |  |  |  |  |  |  |  |                 |  |  |  |  |  |  |  |  |  |        |  |  |  |  |  |  |  |  |  |
|--------------------------------------------------------------------------------------------------------------------------------------------------------------------------------------------------------------------------------------------------------------------------------------------------|--|--|--|--|--|--|--|--|--|----------------------------------------------------------------------------------------------------------------------------------------------------------------------------------------------------------------------------------------------------------------------------------------------------|--|--|--|--|--|--|--|--|--|------------------------------------------------------------------|--|--|--|--|--|--|--|--|--|----------------------------------------------------------|--|--|--|--|--|--|--|--|--|-----------------------------------------|--|--|--|--|--|--|--|--|--|-------------------------------------------------------------------------------------------------------------------------------------------------------------------------------|--|--|--|--|--|--|--|--|--|-----------------------|--|--|--|--|--|--|--|--|--|-----------------|--|--|--|--|--|--|--|--|--|--------|--|--|--|--|--|--|--|--|--|
| CONFIDENCIAL                                                                                                                                                                                                                                                                                     |  |  |  |  |  |  |  |  |  | NOTAS:                                                                                                                                                                                                                                                                                             |  |  |  |  |  |  |  |  |  | DOCUMENTOS DE REFERENCIA                                         |  |  |  |  |  |  |  |  |  | REVISIONES                                               |  |  |  |  |  |  |  |  |  | CLIENTE:                                |  |  |  |  |  |  |  |  |  | PROYECTO:                                                                                                                                                                     |  |  |  |  |  |  |  |  |  |                       |  |  |  |  |  |  |  |  |  |                 |  |  |  |  |  |  |  |  |  |        |  |  |  |  |  |  |  |  |  |
| ESTE PLANO Y LA INFORMACION CONTENIDA SON PROPIEDAD DEL CLIENTE, SU USO SIN PERMISO POR PARTE DEL USUARIO ES PROHIBIDO. CUALQUIER MODIFICACION DE LOS DATOS CONTENIDOS EN ESTE PLANO, SIN LA AUTORIZACION ESCRITA EXCLUSIVA DEL USUARIO SIN NINGUNA RESPONSABILIDAD LEGAL POR PARTE DEL CLIENTE. |  |  |  |  |  |  |  |  |  | 1. LA INFORMACION PROPORCIONA ESTA EN EL SISTEMA UTM, ZONA 18 SUR.<br>2. LAS ELEVACIONES EN LOS PERFILES SON EN METROS Y EN UNIDADES EN LAS UNIDADES SE MUESTRA EN METROS CONTRA EL ELEVACIONES EN LAS UNIDADES SE MUESTRA EN METROS CONTRA EL.<br>3. LAS ESCALAS MOSTRADAS ES PARA EL FORMATO A1. |  |  |  |  |  |  |  |  |  | REV. DESCRIPCION                                                 |  |  |  |  |  |  |  |  |  | REV. FECHA DESCRIPCION DEBILLO PREPARO APROBADO AUTORIZO |  |  |  |  |  |  |  |  |  | Ing. Nilsson Mori Sánchez<br>CIP 175217 |  |  |  |  |  |  |  |  |  | CONTRATACION DE SERVICIO PARA LA DETERMINACION DE LA ESTRATIGRAFIA DEL AREA NUCLEAR DE LA ZONA ARQUEOLOGICA MONUMENTAL DE KUELAP<br>NUMERO DE CONTRATO: Nº 030-2023-OGA-SG/MC |  |  |  |  |  |  |  |  |  |                       |  |  |  |  |  |  |  |  |  |                 |  |  |  |  |  |  |  |  |  |        |  |  |  |  |  |  |  |  |  |
|                                                                                                                                                                                                                                                                                                  |  |  |  |  |  |  |  |  |  |                                                                                                                                                                                                                                                                                                    |  |  |  |  |  |  |  |  |  | A 04/07/23 EMITO PARA REVISION S-BLANCO S-BLANCO N. MORI N. MORI |  |  |  |  |  |  |  |  |  |                                                          |  |  |  |  |  |  |  |  |  | TITULO: PLANO DE PERFILES SISMICOS      |  |  |  |  |  |  |  |  |  | ESCALA: GRAFICA                                                                                                                                                               |  |  |  |  |  |  |  |  |  | ESTUDIOS DE GEOFISICA |  |  |  |  |  |  |  |  |  | PLANO Nº: LS-27 |  |  |  |  |  |  |  |  |  | REV. A |  |  |  |  |  |  |  |  |  |



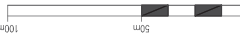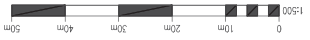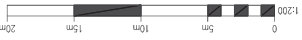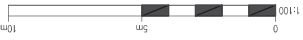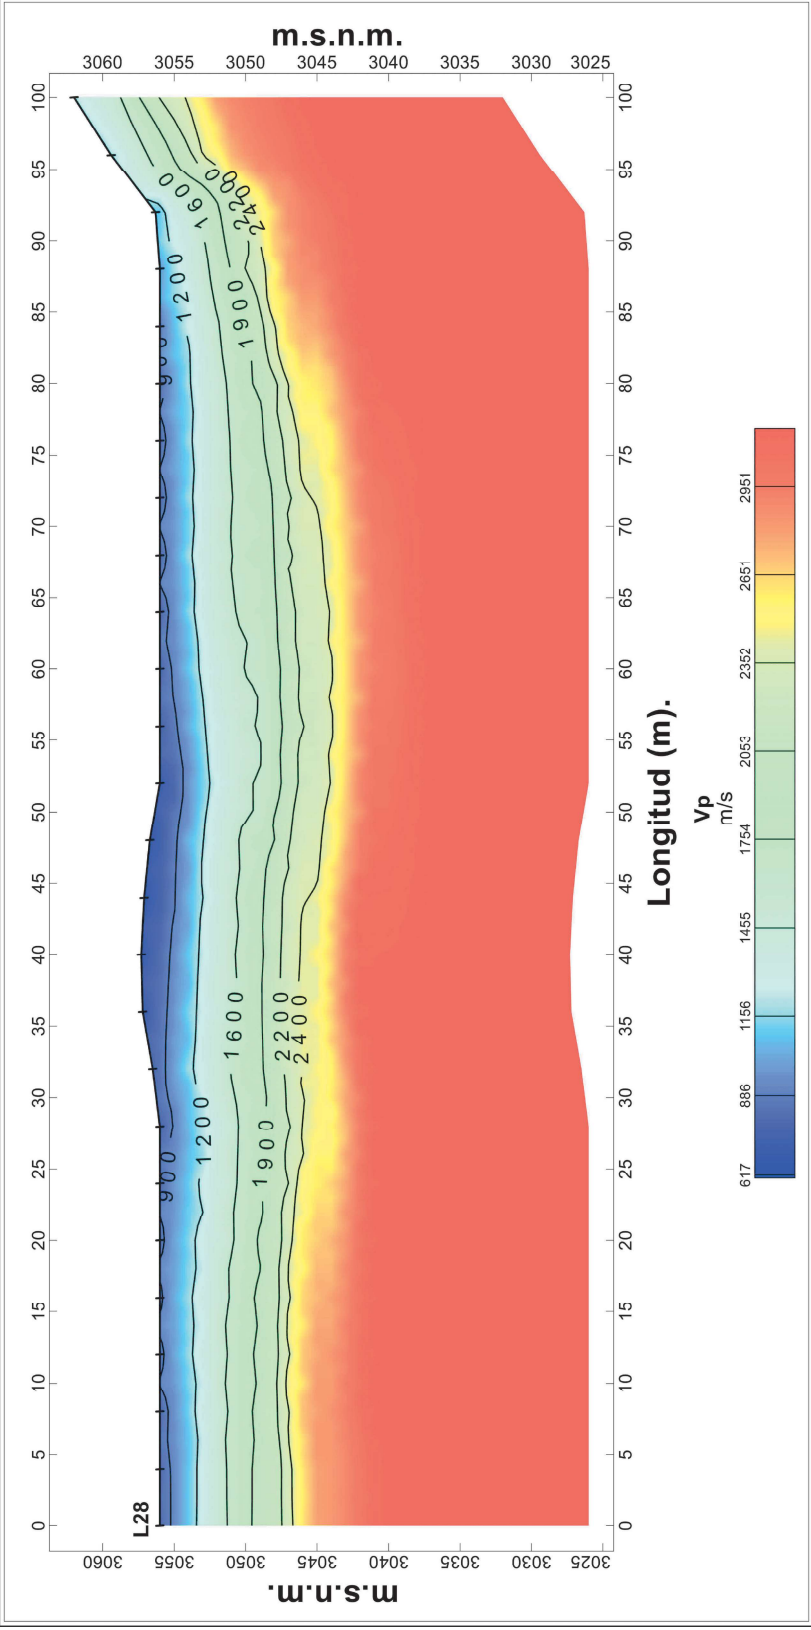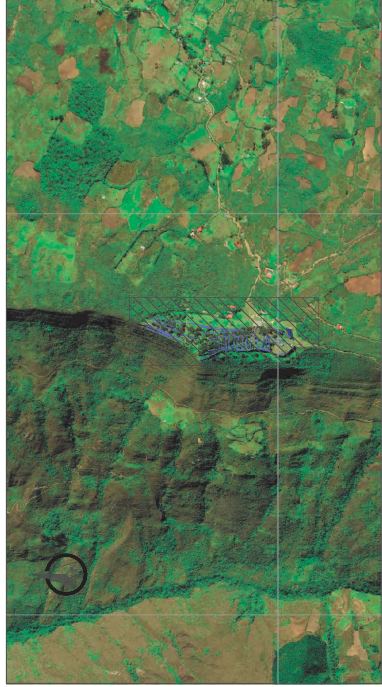

PLANO DE LOCALIZACIÓN DEL PROYECTO  
ESCALA 1/1000

| CUADRO DE COORDENADAS |           |            |           |            |          |        |           |            |           |            |        |       |           |            |            |
|-----------------------|-----------|------------|-----------|------------|----------|--------|-----------|------------|-----------|------------|--------|-------|-----------|------------|------------|
| Código                | Inicio    |            |           |            | Fin      |        |           |            | Código    | Inicio     |        |       |           | Fin        |            |
|                       | Este      | Norte      | Este      | Norte      | Longitud | Código | Norte     | Este       |           | Longitud   | Código | Este  | Norte     |            |            |
| LS-01                 | 176486.00 | 9289459.00 | 176469.25 | 9289506.11 | 50       | LS-21  | 176548.00 | 9289661.00 | 176529.83 | 9289739.34 | 100    | LS-41 | 176468.00 | 9289761.00 | 9289851.00 |
| LS-02                 | 176486.00 | 9289532.00 | 176497.63 | 9289580.63 | 50       | LS-22  | 176558.00 | 9289685.00 | 176576.43 | 9289784.95 | 100    | LS-42 | 176505.00 | 9289752.00 | 9289847.00 |
| LS-03                 | 176490.00 | 9289506.00 | 176491.08 | 9289705.99 | 100      | LS-23  | 176568.00 | 9289685.00 | 176551.15 | 9289784.77 | 100    | LS-43 | 176518.00 | 9289750.00 | 9289847.00 |
| LS-04                 | 176486.00 | 9289596.00 | 176455.48 | 9289787.42 | 100      | LS-24  | 176568.00 | 9289686.00 | 176581.56 | 9289785.08 | 100    | LS-44 | 176504.00 | 9289749.00 | 9289848.00 |
| LS-05                 | 176488.00 | 9289760.00 | 176508.23 | 9289662.07 | 100      | LS-25  | 176575.00 | 9289635.00 | 176564.00 | 9289868.91 | 50     | LS-45 | 176516.00 | 9289754.00 | 9289848.00 |
| LS-06                 | 176504.00 | 9289556.00 | 176510.20 | 9289606.39 | 50       | LS-26  | 176585.00 | 9289630.00 | 176562.01 | 9289967.91 | 50     | LS-46 | 176522.00 | 9289872.00 | 9289955.00 |
| LS-07                 | 176502.00 | 9289587.00 | 176495.24 | 9289537.46 | 50       | LS-27  | 176545.00 | 9289611.00 | 176541.44 | 9289668.87 | 50     | LS-47 | 176536.00 | 9289860.00 | 9289967.00 |
| LS-08                 | 176486.00 | 9289531.00 | 176535.99 | 9289534.02 | 50       | LS-28  | 176536.00 | 9289502.00 | 176572.96 | 9289964.87 | 100    | LS-48 | 176536.00 | 9289872.00 | 9290870.70 |
| LS-09                 | 176491.00 | 9289547.00 | 176540.68 | 9289541.36 | 50       | LS-29  | 176542.00 | 9289503.00 | 176587.25 | 9289992.18 | 100    | LS-49 | 176550.00 | 9289757.00 | 9290864.00 |
| LS-10                 | 176494.00 | 9289565.00 | 176541.74 | 9289550.15 | 50       | LS-30  | 176542.00 | 9289597.00 | 176587.25 | 929991.48  | 100    | LS-50 | 176554.00 | 9289769.00 | 9290864.00 |
| LS-11                 | 176495.00 | 9289580.00 | 176544.69 | 9289574.48 | 50       | LS-31  | 176551.00 | 9289661.00 | 176571.53 | 929996.09  | 100    | LS-51 | 176531.00 | 9289756.00 | 9290845.00 |
| LS-12                 | 176521.00 | 9289591.00 | 176570.03 | 9289581.19 | 50       | LS-32  | 176535.00 | 9289865.00 | 176559.99 | 929996.83  | 100    | LS-52 | 176533.00 | 9289760.00 | 9290830.00 |
| LS-13                 | 176488.00 | 9289502.00 | 176547.96 | 9289604.04 | 50       | LS-33  | 176566.00 | 9289875.00 | 176595.47 | 929998.58  | 100    | LS-53 | 176585.00 | 9289755.00 | 9290863.00 |
| LS-14                 | 176489.00 | 9289521.00 | 176538.89 | 9289617.75 | 50       | LS-34  | 176575.00 | 9289881.00 | 176597.65 | 929997.65  | 100    | LS-54 | 176519.00 | 9289866.00 | 9290858.00 |
| LS-15                 | 176490.00 | 9289538.00 | 176539.29 | 9289629.61 | 50       | LS-35  | 176510.00 | 9289955.00 | 176589.96 | 929987.03  | 100    | LS-55 | 176519.00 | 9289850.00 | 9290859.00 |
| LS-16                 | 176492.00 | 9289553.00 | 176541.75 | 9289648.03 | 50       | LS-36  | 176510.00 | 9289955.00 | 176589.96 | 929985.14  | 100    | LS-56 | 176564.00 | 9289851.00 | 9290859.00 |
| LS-17                 | 176497.00 | 9289569.00 | 176546.37 | 9289661.10 | 50       | LS-37  | 176536.00 | 9289945.00 | 176584.51 | 929984.74  | 100    | LS-57 | 176564.00 | 9289847.00 | 9290859.00 |
| LS-18                 | 176495.00 | 9289585.00 | 176544.92 | 9289682.33 | 50       | LS-38  | 176517.00 | 9289485.00 | 176524.20 | 929984.04  | 100    | LS-58 | 176493.00 | 9289870.00 | 9290859.00 |
| LS-19                 | 176497.00 | 9289593.00 | 176546.81 | 9289697.33 | 50       | LS-39  | 176527.00 | 9289603.00 | 176588.16 | 929984.36  | 100    | LS-59 | 176548.00 | 9289872.00 | 9290859.00 |
| LS-20                 | 176512.00 | 9289705.00 | 176530.40 | 9289751.49 | 50       | LS-40  | 176527.00 | 9289738.00 | 176591.62 | 929986.25  | 100    | LS-60 | 176531.00 | 9289900.00 | 9290859.00 |

CONFIDENCIAL

ESTE PLANO Y LA INFORMACIÓN CONTENIDA SON PROPIEDAD DEL CLIENTE. SU USO SIN PERMISO POR ESCRITO DEL CLIENTE, O LA REALIZACIÓN DE CUALQUIER MODIFICACIÓN DE LOS DATOS CONTENIDOS EN ESTE PLANO, PODRÁ SER CONSIDERADA UNA RESPONSABILIDAD LEGAL POR PARTE DEL CLIENTE.

NOTAS:

1. LA INFORMACIÓN TOPOGRÁFICA ESTÁ EN EL SISTEMA UTM NAD83, ZONA 18 SUR.

2. LAS UNIDADES DE LONGITUD SON EN METROS Y LAS UNIDADES DE ALTURA SON EN METROS.

3. LAS ESCALAS MOSTRADAS SON PARA EL FORMATO A1.

DOCUMENTOS DE REFERENCIA

REV.

DESCRIPCIÓN

REV. A

PLANOS DE LOCALIZACIÓN DEL PROYECTO

REVISIONES

REV.

FECHA

DESCRIPCIÓN

DEBILLO

PREPARO

APROBÓ

AUTORIZÓ

REV.

FECHA

DESCRIPCIÓN

DEBILLO

PREPARO

APROBÓ

AUTORIZÓ

CLIENTE:

PROYECTO:

CONTRATACIÓN DE SERVICIO PARA LA DETERMINACIÓN DE LA ESTRATIGRAFÍA DE ÁREA NUCLEAR DE LA ZONA ARQUEOLÓGICA MONUMENTAL DE KUÉLAP

NUMERO DE CONTRATO: Nº 030-2023-06A-SG/MC

TÍTULO:

PLANO DE PERFILES SÍSMICOS

ESCALA:

GRÁFICA

PLANO Nº:

LS-28

REV.

A

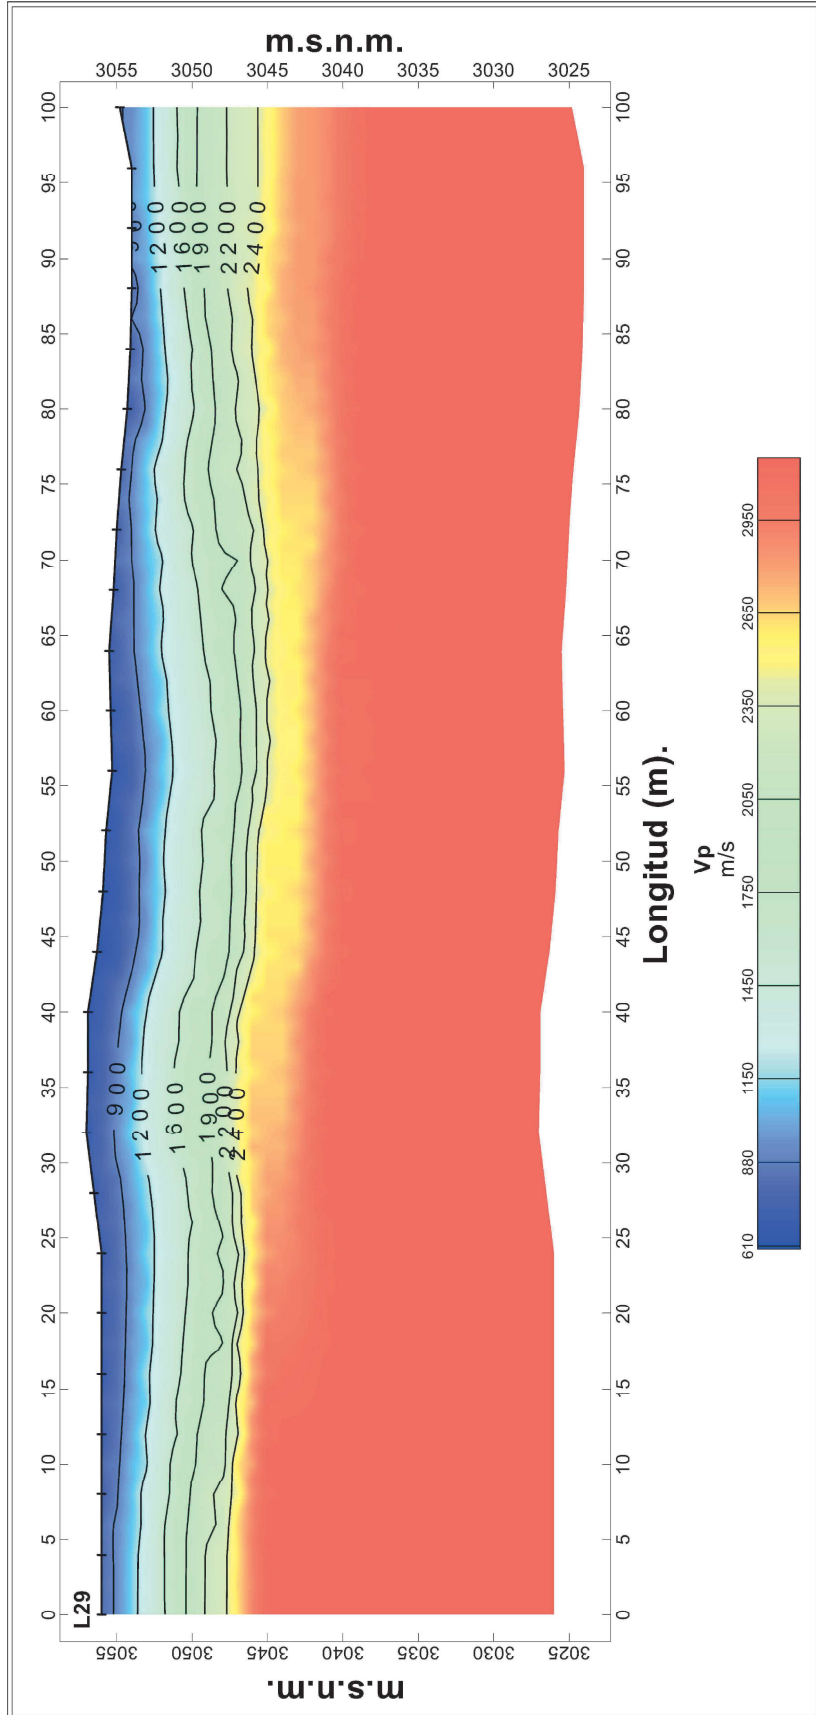

**PLANO DE LOCALIZACIÓN DEL PROYECTO**  
ESCALA: 1/10000

| Código | CUADRO DE COORDENADAS |         |         |         |      |       |       |         |         |         | Longitud | Código | Inicio |       |         |         | Fin     |         |      |       | Longitud | Código  | Inicio  |         |      |       | Fin    |         |         |         | Longitud |     |
|--------|-----------------------|---------|---------|---------|------|-------|-------|---------|---------|---------|----------|--------|--------|-------|---------|---------|---------|---------|------|-------|----------|---------|---------|---------|------|-------|--------|---------|---------|---------|----------|-----|
|        | Este                  | Norte   | Este    | Norte   | Este | Norte | Este  | Norte   | Este    | Norte   |          |        | Este   | Norte | Este    | Norte   | Este    | Norte   | Este | Norte |          |         | Este    | Norte   | Este | Norte |        |         |         |         |          |     |
| LS-01  | 1764800               | 9289450 | 1764693 | 9289506 | 11   | 50    | LS-21 | 1765400 | 9289861 | 1765293 | 9289793  | 34     | 100    | LS-41 | 1764608 | 9289761 | 1765140 | 9289851 | 100  | LS-61 | 1765400  | 9289861 | 1765293 | 9289793 | 34   | 100   | LS-81  | 1764608 | 9289761 | 1765140 | 9289851  | 100 |
| LS-02  | 1764800               | 9289532 | 1764697 | 9289588 | 63   | 50    | LS-22 | 1765500 | 9289865 | 1765676 | 9289798  | 95     | 100    | LS-42 | 1765000 | 9289750 | 1765400 | 9289840 | 100  | LS-62 | 1765500  | 9289865 | 1765676 | 9289798 | 95   | 100   | LS-82  | 1765000 | 9289750 | 1765400 | 9289840  | 100 |
| LS-03  | 1764900               | 9289606 | 1764901 | 9289707 | 42   | 100   | LS-23 | 1765600 | 9289866 | 1765851 | 9289798  | 77     | 100    | LS-43 | 1765100 | 9289740 | 1765500 | 9289830 | 100  | LS-63 | 1765600  | 9289866 | 1765851 | 9289798 | 77   | 100   | LS-83  | 1765100 | 9289740 | 1765500 | 9289830  | 100 |
| LS-04  | 1764900               | 9289696 | 1764955 | 9289787 | 42   | 100   | LS-24 | 1765600 | 9289866 | 1765851 | 9289798  | 77     | 100    | LS-44 | 1765100 | 9289740 | 1765500 | 9289830 | 100  | LS-64 | 1765600  | 9289866 | 1765851 | 9289798 | 77   | 100   | LS-84  | 1765100 | 9289740 | 1765500 | 9289830  | 100 |
| LS-05  | 1764800               | 9289760 | 1765083 | 9289866 | 37   | 100   | LS-25 | 1765500 | 9289863 | 1765652 | 9289803  | 91     | 50     | LS-45 | 1765100 | 9289740 | 1765500 | 9289830 | 100  | LS-65 | 1765500  | 9289863 | 1765652 | 9289803 | 91   | 50    | LS-85  | 1765100 | 9289740 | 1765500 | 9289830  | 100 |
| LS-06  | 1765000               | 9289856 | 1765120 | 9289866 | 09   | 50    | LS-26 | 1765600 | 9289863 | 1765652 | 9289803  | 91     | 50     | LS-46 | 1765100 | 9289740 | 1765500 | 9289830 | 100  | LS-66 | 1765600  | 9289863 | 1765652 | 9289803 | 91   | 50    | LS-86  | 1765100 | 9289740 | 1765500 | 9289830  | 100 |
| LS-07  | 1765000               | 9289857 | 1764905 | 9289837 | 46   | 50    | LS-27 | 1765400 | 9289861 | 1765441 | 9289607  | 87     | 100    | LS-47 | 1765000 | 9289750 | 1765400 | 9289840 | 100  | LS-67 | 1765400  | 9289861 | 1765441 | 9289607 | 87   | 100   | LS-87  | 1765000 | 9289750 | 1765400 | 9289840  | 100 |
| LS-08  | 1764800               | 9289533 | 1765399 | 9289534 | 06   | 50    | LS-28 | 1765300 | 9289802 | 1765272 | 9289994  | 70     | 100    | LS-48 | 1765000 | 9289750 | 1765400 | 9289840 | 100  | LS-68 | 1765300  | 9289802 | 1765272 | 9289994 | 70   | 100   | LS-88  | 1765000 | 9289750 | 1765400 | 9289840  | 100 |
| LS-09  | 1764900               | 9289547 | 1765048 | 9289541 | 36   | 50    | LS-29 | 1765400 | 9289803 | 1765875 | 9289992  | 14     | 100    | LS-49 | 1765500 | 9289760 | 1765797 | 9289862 | 100  | LS-69 | 1765400  | 9289803 | 1765875 | 9289992 | 14   | 100   | LS-89  | 1765500 | 9289760 | 1765797 | 9289862  | 100 |
| LS-10  | 1764900               | 9289565 | 1765474 | 9289560 | 11   | 50    | LS-30 | 1765400 | 9289807 | 1765801 | 9289991  | 44     | 100    | LS-50 | 1765500 | 9289760 | 1765797 | 9289862 | 100  | LS-70 | 1765400  | 9289807 | 1765801 | 9289991 | 44   | 100   | LS-90  | 1765500 | 9289760 | 1765797 | 9289862  | 100 |
| LS-11  | 1764900               | 9289580 | 1765440 | 9289574 | 48   | 50    | LS-31 | 1765500 | 9289861 | 1765713 | 9289946  | 09     | 100    | LS-51 | 1765300 | 9289760 | 1765655 | 9289845 | 100  | LS-71 | 1765500  | 9289861 | 1765713 | 9289946 | 09   | 100   | LS-91  | 1765300 | 9289760 | 1765655 | 9289845  | 100 |
| LS-12  | 1765200               | 9289590 | 1765703 | 9289581 | 19   | 50    | LS-32 | 1765300 | 9289865 | 1765599 | 9289968  | 83     | 100    | LS-52 | 1765300 | 9289760 | 1765655 | 9289845 | 100  | LS-72 | 1765300  | 9289865 | 1765599 | 9289968 | 83   | 100   | LS-92  | 1765300 | 9289760 | 1765655 | 9289845  | 100 |
| LS-13  | 1764900               | 9289602 | 1765387 | 9289604 | 04   | 100   | LS-33 | 1765600 | 9289875 | 1765959 | 9289968  | 50     | 100    | LS-53 | 1765300 | 9289760 | 1765655 | 9289845 | 100  | LS-73 | 1765600  | 9289875 | 1765959 | 9289968 | 50   | 100   | LS-93  | 1765300 | 9289760 | 1765655 | 9289845  | 100 |
| LS-14  | 1764900               | 9289621 | 1765388 | 9289617 | 75   | 50    | LS-34 | 1765700 | 9289881 | 1766027 | 9289976  | 65     | 100    | LS-54 | 1765100 | 9289740 | 1765500 | 9289830 | 100  | LS-74 | 1765700  | 9289881 | 1766027 | 9289976 | 65   | 100   | LS-94  | 1765100 | 9289740 | 1765500 | 9289830  | 100 |
| LS-15  | 1764900               | 9289638 | 1765399 | 9289629 | 61   | 50    | LS-35 | 1766100 | 9289895 | 1765889 | 9289877  | 03     | 100    | LS-55 | 1764800 | 9289750 | 1765636 | 9289840 | 100  | LS-75 | 1766100  | 9289895 | 1765889 | 9289877 | 03   | 100   | LS-95  | 1764800 | 9289750 | 1765636 | 9289840  | 100 |
| LS-16  | 1764900               | 9289650 | 1765399 | 9289648 | 03   | 50    | LS-36 | 1765100 | 9289452 | 1765446 | 9289545  | 14     | 100    | LS-56 | 1765600 | 9289866 | 1765851 | 9289798 | 100  | LS-76 | 1765100  | 9289452 | 1765446 | 9289545 | 14   | 100   | LS-96  | 1765600 | 9289866 | 1765851 | 9289798  | 100 |
| LS-17  | 1764900               | 9289669 | 1765463 | 9289661 | 10   | 50    | LS-37 | 1765300 | 9289485 | 1765841 | 9289574  | 100    | 100    | LS-57 | 1765600 | 9289866 | 1765851 | 9289798 | 100  | LS-77 | 1765300  | 9289485 | 1765841 | 9289574 | 100  | 100   | LS-97  | 1765600 | 9289866 | 1765851 | 9289798  | 100 |
| LS-18  | 1764900               | 9289695 | 1765442 | 9289692 | 23   | 50    | LS-38 | 1765100 | 9289480 | 1765274 | 9289584  | 04     | 100    | LS-58 | 1764900 | 9289750 | 1765606 | 9289730 | 100  | LS-78 | 1765100  | 9289480 | 1765274 | 9289584 | 04   | 100   | LS-98  | 1764900 | 9289750 | 1765606 | 9289730  | 100 |
| LS-19  | 1765100               | 9289703 | 1765466 | 9289697 | 33   | 50    | LS-39 | 1765200 | 9289803 | 1765681 | 9289864  | 25     | 100    | LS-59 | 1765400 | 9289760 | 1765797 | 9289862 | 100  | LS-79 | 1765200  | 9289803 | 1765681 | 9289864 | 25   | 100   | LS-99  | 1765400 | 9289760 | 1765797 | 9289862  | 100 |
| LS-20  | 1765100               | 9289705 | 1765400 | 9289715 | 49   | 100   | LS-40 | 1765300 | 9289807 | 1765916 | 9289962  | 15     | 100    | LS-60 | 1765300 | 9289760 | 1765655 | 9289845 | 100  | LS-80 | 1765300  | 9289807 | 1765916 | 9289962 | 15   | 100   | LS-100 | 1765300 | 9289760 | 1765655 | 9289845  | 100 |

[illegible]



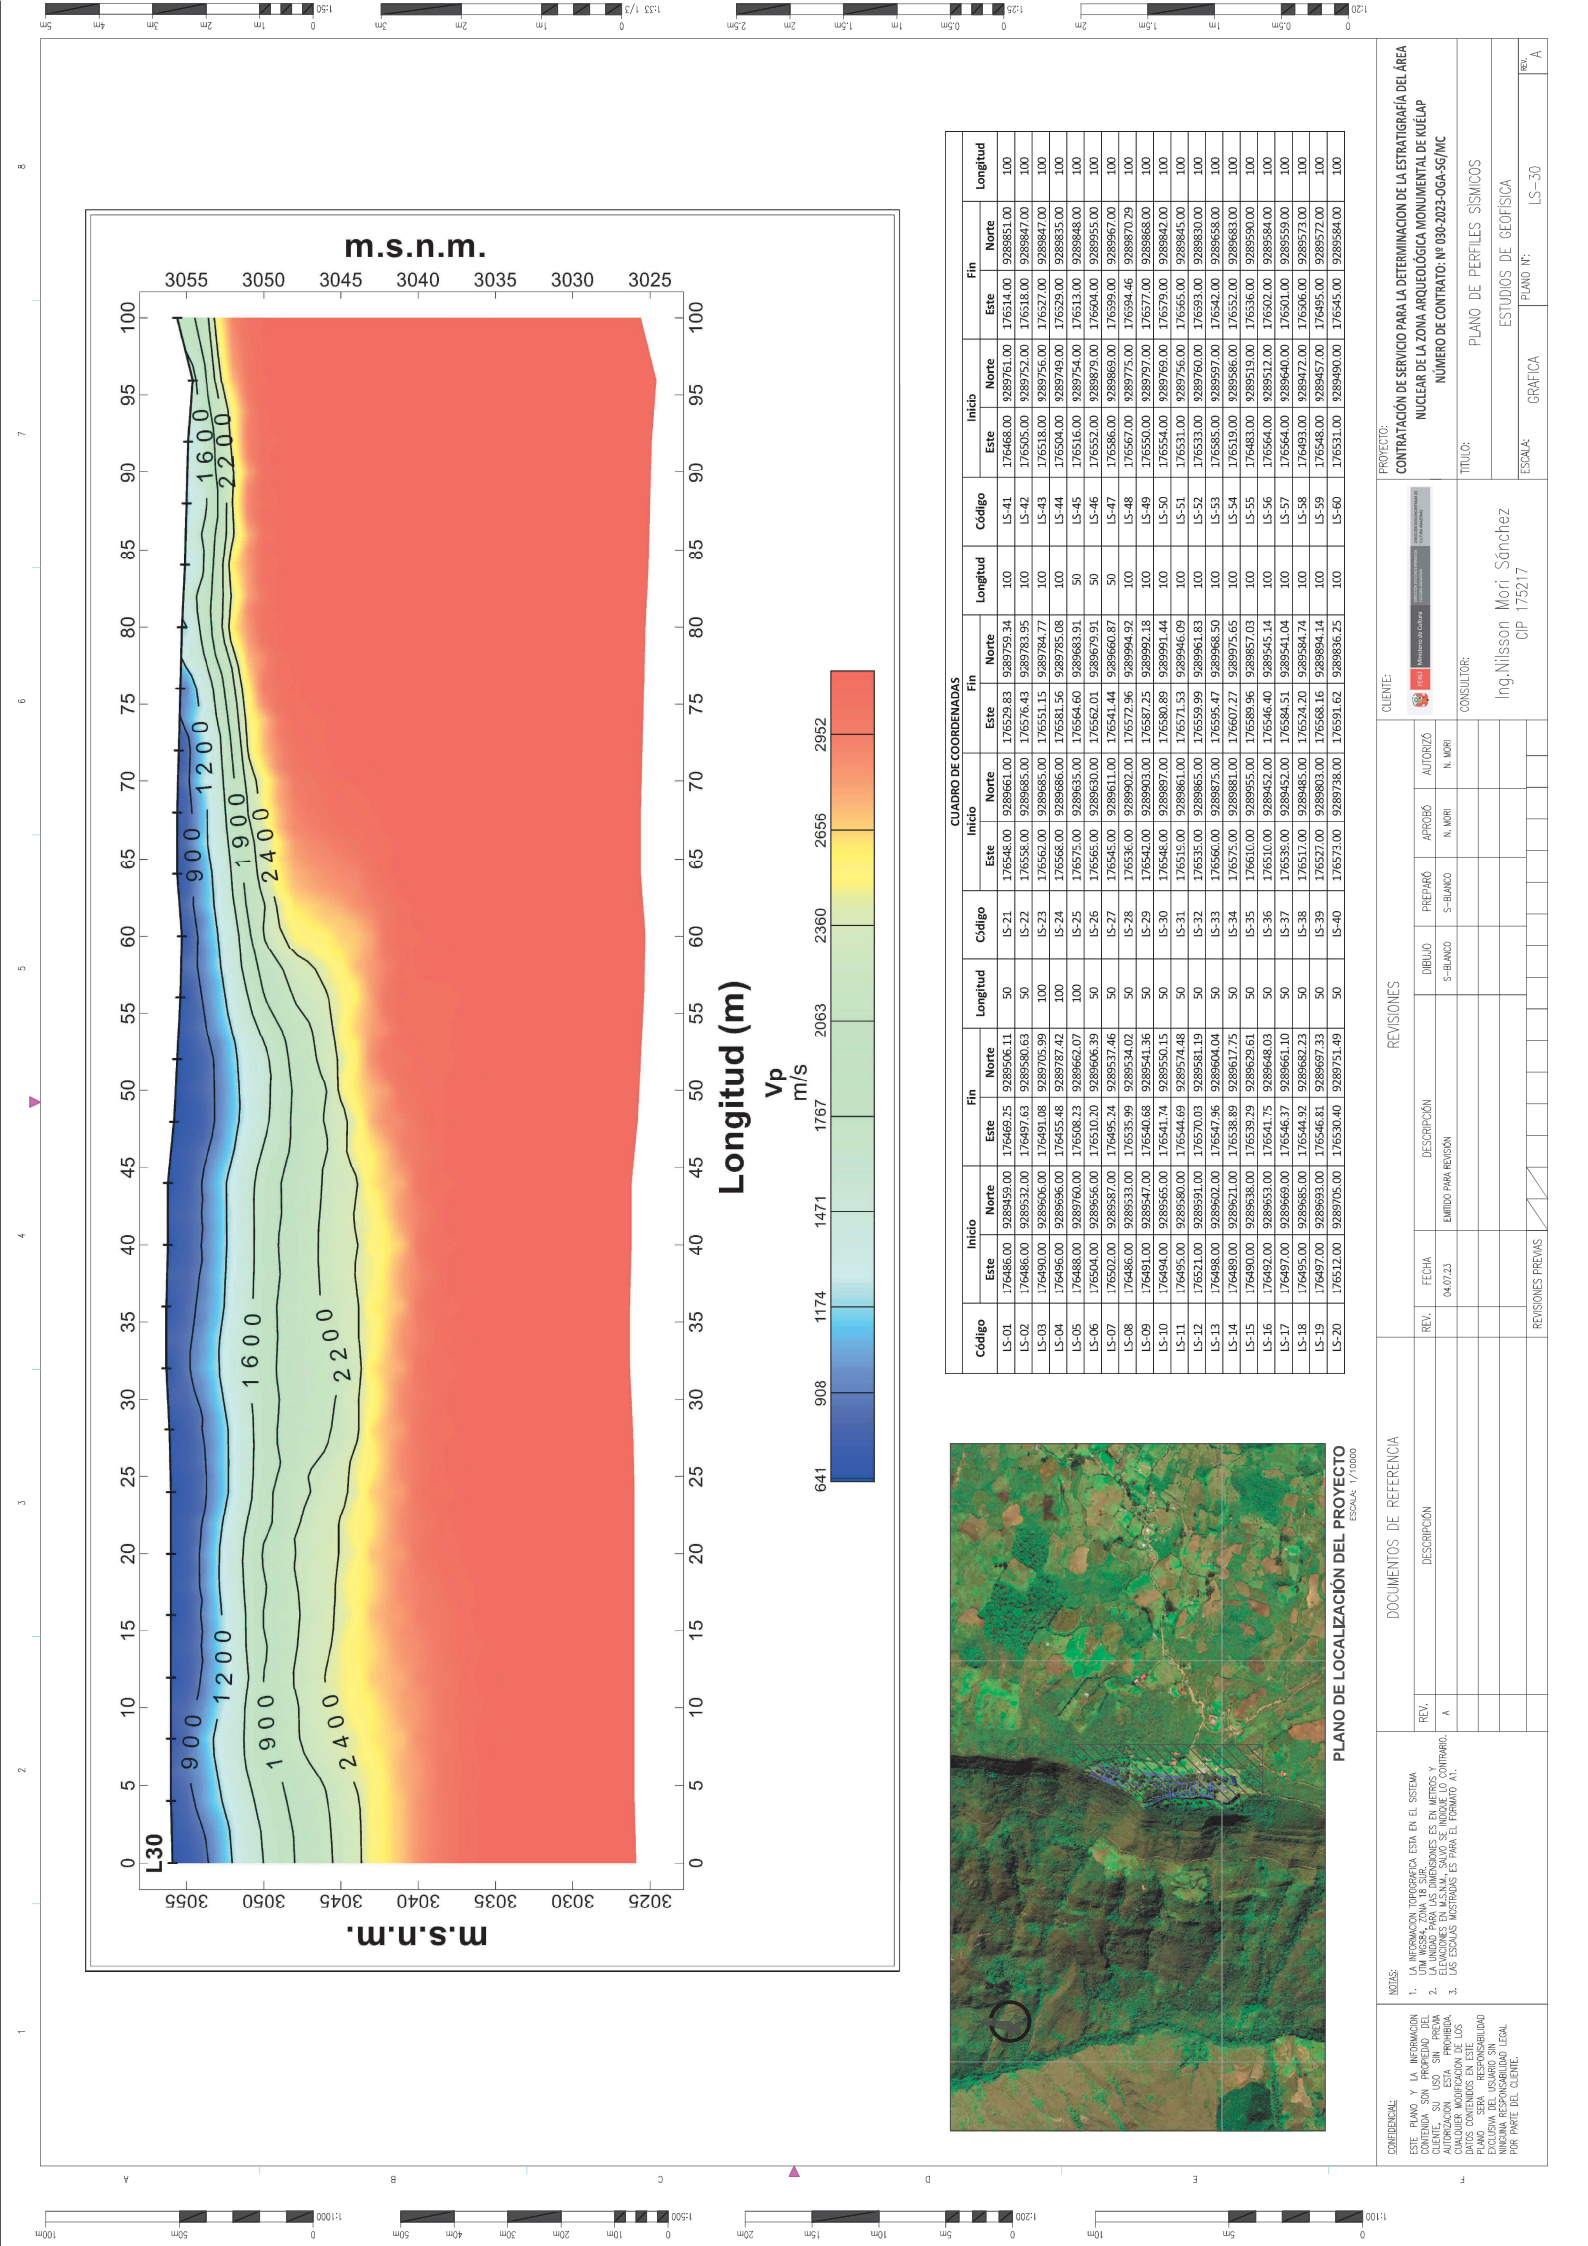

PLANO DE LOCALIZACIÓN DEL PROYECTO  
ESCALA 1/1000

| CUADRO DE COORDENADAS |           |            |           |            |       |          |           |            |           |            |        |        |           |            |           |            |
|-----------------------|-----------|------------|-----------|------------|-------|----------|-----------|------------|-----------|------------|--------|--------|-----------|------------|-----------|------------|
| Código                | Inicio    |            |           | Fin        |       |          | Código    | Fin        |           |            | Código | Inicio |           |            | Fin       | Longitud   |
|                       | Este      | Norte      | Longitud  | Este       | Norte | Longitud |           | Este       | Norte     | Longitud   |        | Este   | Norte     | Longitud   |           |            |
| LS-01                 | 176486.00 | 9289459.00 | 176469.25 | 9289506.11 | 50    | LS-21    | 176546.00 | 9289661.00 | 176529.83 | 9289759.34 | 100    | LS-41  | 176468.00 | 9289761.00 | 176514.00 | 9289851.00 |
| LS-02                 | 176486.00 | 9289532.00 | 176497.63 | 9289590.63 | 50    | LS-22    | 176558.00 | 9289685.00 | 176576.43 | 9289783.95 | 100    | LS-42  | 176505.00 | 9289756.00 | 176518.00 | 9289847.00 |
| LS-03                 | 176490.00 | 9289506.00 | 176491.08 | 9289705.99 | 100   | LS-23    | 176562.00 | 9289685.00 | 176551.15 | 9289784.77 | 100    | LS-43  | 176518.00 | 9289752.00 | 176527.00 | 9289847.00 |
| LS-04                 | 176496.00 | 9289596.00 | 176455.48 | 9289787.42 | 100   | LS-24    | 176566.00 | 9289686.00 | 176581.56 | 9289785.08 | 100    | LS-44  | 176504.00 | 9289749.00 | 176529.00 | 9289845.00 |
| LS-05                 | 176488.00 | 9289760.00 | 176508.23 | 9289662.07 | 100   | LS-25    | 176575.00 | 9289635.00 | 176584.60 | 9289683.91 | 50     | LS-45  | 176516.00 | 9289754.00 | 176531.00 | 9289848.00 |
| LS-06                 | 176504.00 | 9289556.00 | 176510.20 | 9289606.39 | 50    | LS-26    | 176585.00 | 9289630.00 | 176562.01 | 9289679.87 | 50     | LS-46  | 176552.00 | 9289729.00 | 176504.00 | 9289855.00 |
| LS-07                 | 176502.00 | 9289587.00 | 176495.24 | 9289537.46 | 50    | LS-27    | 176545.00 | 9289611.00 | 176541.44 | 9289669.87 | 50     | LS-47  | 176566.00 | 9289689.00 | 176594.00 | 9289867.00 |
| LS-08                 | 176486.00 | 9289531.00 | 176535.99 | 9289534.02 | 50    | LS-28    | 176536.00 | 9289502.00 | 176572.96 | 9289694.92 | 100    | LS-48  | 176567.00 | 9289775.00 | 176504.46 | 9289870.99 |
| LS-09                 | 176491.00 | 9289547.00 | 176540.68 | 9289541.36 | 50    | LS-29    | 176542.00 | 9289503.00 | 176587.25 | 9289992.18 | 100    | LS-49  | 176550.00 | 9289797.00 | 176577.00 | 9289868.00 |
| LS-10                 | 176494.00 | 9289565.00 | 176541.74 | 9289550.15 | 50    | LS-30    | 176546.00 | 9289597.00 | 176580.89 | 9289991.44 | 100    | LS-50  | 176554.00 | 9289769.00 | 176575.00 | 9289867.00 |
| LS-11                 | 176495.00 | 9289580.00 | 176544.69 | 9289574.48 | 50    | LS-31    | 176551.00 | 9289611.00 | 176571.53 | 9289946.09 | 100    | LS-51  | 176531.00 | 9289756.00 | 176635.00 | 9289845.00 |
| LS-12                 | 176521.00 | 9289591.00 | 176570.03 | 9289581.19 | 50    | LS-32    | 176555.00 | 9289665.00 | 176559.99 | 9289961.83 | 100    | LS-52  | 176531.00 | 9289760.00 | 176639.00 | 9289845.00 |
| LS-13                 | 176498.00 | 9289502.00 | 176547.96 | 9289604.04 | 50    | LS-33    | 176566.00 | 9289875.00 | 176595.47 | 9289968.50 | 100    | LS-53  | 176585.00 | 9289759.00 | 176642.00 | 9289963.00 |
| LS-14                 | 176490.00 | 9289521.00 | 176538.89 | 9289617.75 | 50    | LS-34    | 176575.00 | 9289881.00 | 176607.27 | 9289975.65 | 100    | LS-54  | 176519.00 | 9289786.00 | 176652.00 | 9289963.00 |
| LS-15                 | 176492.00 | 9289538.00 | 176539.29 | 9289629.61 | 50    | LS-35    | 176610.00 | 9289955.00 | 176589.96 | 9289987.03 | 100    | LS-55  | 176483.00 | 9289751.00 | 176636.00 | 9289950.00 |
| LS-16                 | 176492.00 | 9289563.00 | 176541.75 | 9289648.03 | 50    | LS-36    | 176576.00 | 9289452.00 | 176546.40 | 9289945.14 | 100    | LS-56  | 176564.00 | 9289710.00 | 176631.00 | 9289950.00 |
| LS-17                 | 176497.00 | 9289569.00 | 176546.37 | 9289661.10 | 50    | LS-37    | 176557.00 | 9289485.00 | 176584.51 | 9289941.04 | 100    | LS-57  | 176564.00 | 9289640.00 | 176605.00 | 9289959.00 |
| LS-18                 | 176495.00 | 9289585.00 | 176544.92 | 9289682.33 | 50    | LS-38    | 176517.00 | 9289485.00 | 176524.20 | 9289958.74 | 100    | LS-58  | 176493.00 | 9289472.00 | 176506.00 | 9289957.00 |
| LS-19                 | 176497.00 | 9289593.00 | 176546.81 | 9289697.33 | 50    | LS-39    | 176527.00 | 9289603.00 | 176568.16 | 9289984.14 | 100    | LS-59  | 176548.00 | 9289457.00 | 176495.00 | 9289954.00 |
| LS-20                 | 176512.00 | 9289705.00 | 176530.40 | 9289751.49 | 50    | LS-40    | 176572.00 | 9289738.00 | 176591.62 | 9289986.26 | 100    | LS-60  | 176531.00 | 9289450.00 | 176455.00 | 9289954.00 |

CONFIDENCIAL

EST: PLANO Y LA INFORMACION CONTENIDA SON PROPIEDAD DEL CLIENTE. SU USO SIN PERMISO POR ESCRITO DEL CLIENTE, O LA REALIZACION DE CUALQUIER MODIFICACION DE LOS DATOS CONTENIDOS EN ESTE PLANO, PODRA SER CONSIDERADA UNA RESPONSABILIDAD LEGAL POR PARTE DEL CLIENTE.

NOTAS:

1. LA INFORMACION TOPOGRAFICA ESTA EN EL SISTEMA UTM NOROCCIDENTAL, ZONA 18 SUR.

2. LAS UNIDADES EN LAS QUE SE DA EL MEDIMIENTO SON METROS Y DECIMOS DE METRO.

3. LAS ESCALAS MOSTRADAS SON PARA EL FORMATO A1.

DOCUMENTOS DE REFERENCIA

REV.

DESCRIPCION

REV. A

PLAN DE LOCALIZACIÓN DEL PROYECTO

REVISIONES

REVISIÓN

FECHA

DESCRIPCION

DEBILLO

PREPARO

APROBADO

AUTORIZADO

1

04/07/23

PLAN DE LOCALIZACIÓN DEL PROYECTO

S-BLANCO

N. MORI

N. MORI

N. MORI

CLIENTE:

PROYECTO:

CONTRATACIÓN DE SERVICIO PARA LA DETERMINACIÓN DE LA ESTRATIGRAFÍA DE ÁREA NUCLEAR DE LA ZONA ARQUEOLÓGICA MONUMENTAL DE KUÉLAP

TÍTULO:

PLANO DE PERFILES SÍSMICOS

CONSULTOR:

Ing. Nilsson Mori Sánchez

ESCALA:

GRÁFICA

PLANO Nº:

LS-30

REV.

A

NUMERO DE CONTRATO: Nº 030-2023-OGA-SG/MC

PROYECTO: CONTRATACIÓN DE SERVICIO PARA LA DETERMINACIÓN DE LA ESTRATIGRAFÍA DE ÁREA NUCLEAR DE LA ZONA ARQUEOLÓGICA MONUMENTAL DE KUÉLAP

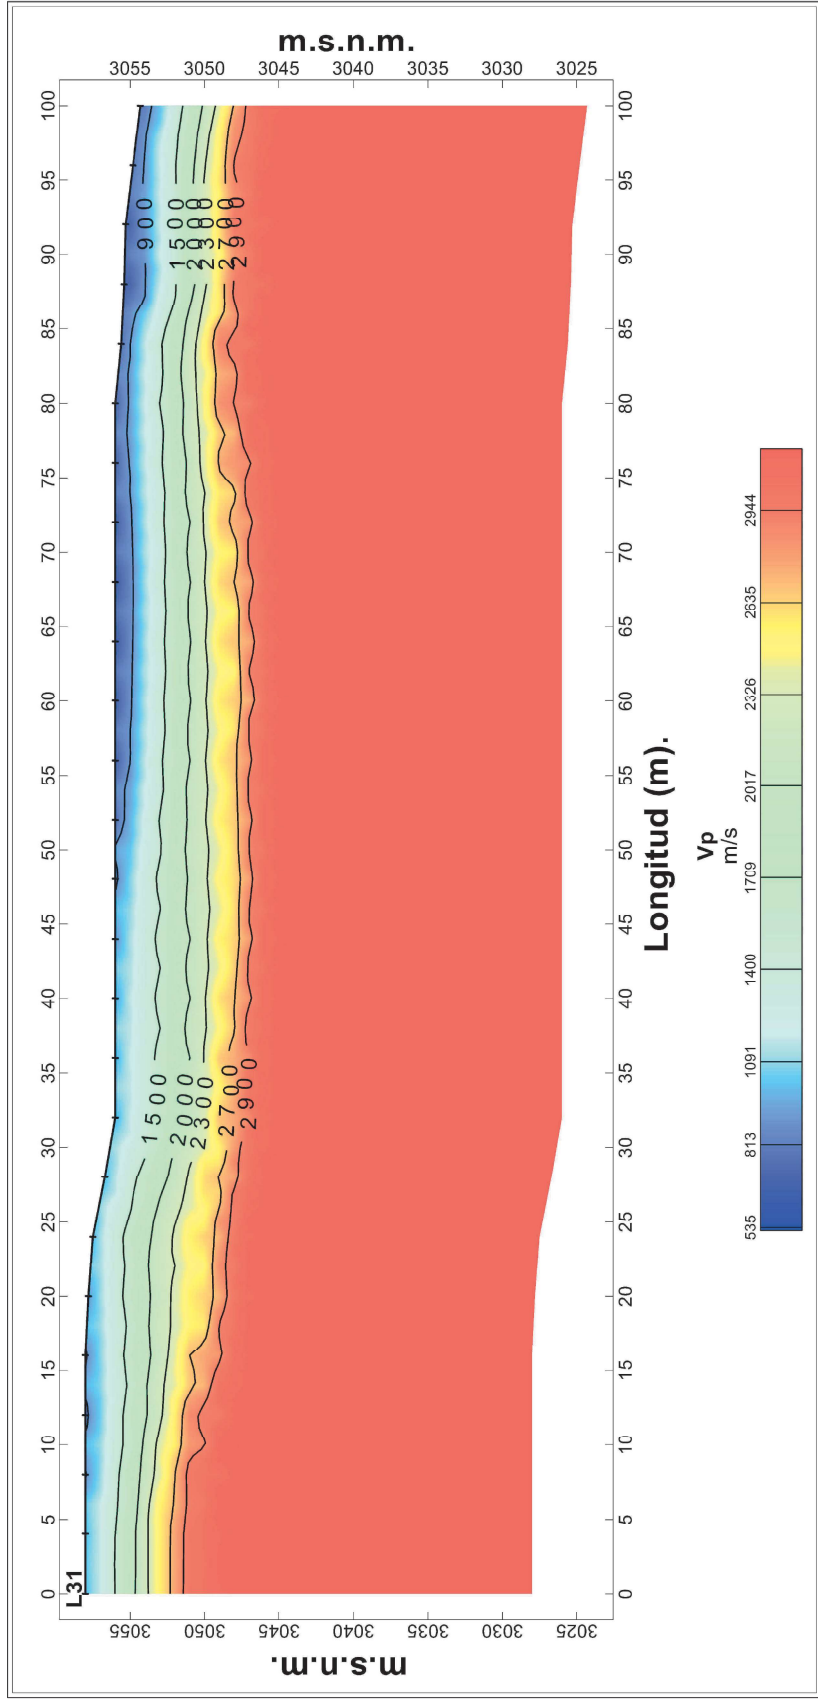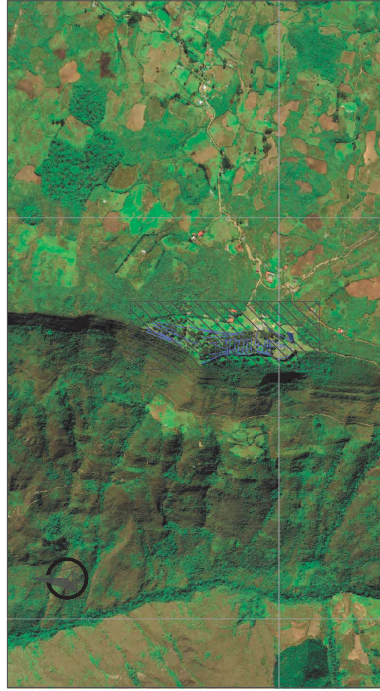

**PLANO DE LOCALIZACIÓN DEL PROYECTO**  
ESCALA: 1/10000

| Código | CUADRO DE COORDENADAS |            |           |            |        |          |         |            |            |            |        |          |         |            | Longitud   | Latitud    |      |       |
|--------|-----------------------|------------|-----------|------------|--------|----------|---------|------------|------------|------------|--------|----------|---------|------------|------------|------------|------|-------|
|        | Inicio                |            | Fin       |            | Código | Longitud | Inicio  |            | Fin        |            | Código | Longitud | Inicio  |            |            |            | Fin  |       |
|        | Este                  | Norte      | Este      | Norte      |        |          | Este    | Norte      | Este       | Norte      |        |          | Este    | Norte      |            |            | Este | Norte |
| LS-01  | 1764886               | 9289459    | 1764629   | 9289506.11 | 50     | LS-21    | 1765538 | 9289861    | 1765239    | 9289739.34 | 100    | LS-41    | 1765488 | 9289761.00 | 1765344    | 9289881.00 |      |       |
| LS-02  | 1764886               | 9289532.14 | 176497.63 | 9289509.63 | 50     | LS-22    | 1765538 | 9289865    | 1765766.43 | 9289739.35 | 100    | LS-42    | 1765488 | 9289752.00 | 1765344    | 9289887.00 |      |       |
| LS-03  | 1764900               | 9289506.00 | 176495.48 | 9289709.99 | 100    | LS-23    | 1765568 | 9289886    | 176551.55  | 9289788.77 | 100    | LS-43    | 1765318 | 9289756.00 | 1765277    | 9289847.00 |      |       |
| LS-04  | 1764900               | 9289506.00 | 176495.48 | 9289787.42 | 100    | LS-24    | 1765568 | 9289886    | 176581.56  | 9289785.08 | 100    | LS-44    | 1765204 | 9289748.00 | 1765299    | 9289847.00 |      |       |
| LS-05  | 1764888               | 9289760.00 | 176508.23 | 9289662.07 | 100    | LS-25    | 1765755 | 9289855    | 1765564.60 | 9289683.91 | 50     | LS-45    | 1765166 | 9289754.00 | 1765133    | 9289848.00 |      |       |
| LS-06  | 1765044               | 9289636.00 | 1765120   | 9289606.39 | 50     | LS-26    | 1765965 | 9289830    | 176562.01  | 9289679.91 | 50     | LS-46    | 1765372 | 9289870.00 | 1765604    | 9289955.00 |      |       |
| LS-07  | 1765020               | 9289587.47 | 176495.24 | 9289537.46 | 50     | LS-27    | 1765445 | 9289861    | 1765441    | 9289640.87 | 50     | LS-47    | 1765686 | 9289868.00 | 1765699    | 9289967.00 |      |       |
| LS-08  | 1764886               | 9289532.14 | 176535.99 | 9289534.36 | 50     | LS-28    | 1765636 | 9289902    | 1765772.96 | 9289994.92 | 100    | LS-48    | 1765657 | 9289775.00 | 1765634.46 | 9289870.29 |      |       |
| LS-09  | 1764900               | 9289547.00 | 176540.68 | 9289541.32 | 50     | LS-29    | 1765442 | 9289903    | 1765872.25 | 9289992.18 | 100    | LS-49    | 1765500 | 9289797.00 | 1765707    | 9289868.00 |      |       |
| LS-10  | 1764904               | 9289565.00 | 176541.74 | 9289550.48 | 50     | LS-30    | 1765448 | 9289897    | 1765801.89 | 9289991.44 | 100    | LS-50    | 1765544 | 9289769.00 | 1765799    | 9289842.00 |      |       |
| LS-11  | 1764955               | 9289530.00 | 176540.68 | 9289574.15 | 50     | LS-31    | 1765155 | 9289861    | 1765711.53 | 9289964.09 | 100    | LS-51    | 1765331 | 9289756.00 | 1765655    | 9289864.00 |      |       |
| LS-12  | 1765210               | 9289591.00 | 176520.67 | 9289684.19 | 50     | LS-32    | 1765535 | 9289865    | 1765599.48 | 9289961.83 | 100    | LS-52    | 1765333 | 9289760.00 | 1765633    | 9289830.00 |      |       |
| LS-13  | 1764988               | 9289602.00 | 176547.96 | 9289604.04 | 50     | LS-33    | 1765660 | 9289875    | 176595.47  | 9289968.94 | 100    | LS-53    | 1765885 | 9289597.00 | 1765492    | 9289658.00 |      |       |
| LS-14  | 1764980               | 9289621.00 | 176538.89 | 9289617.75 | 50     | LS-34    | 1765755 | 9289881    | 176607.27  | 9289975.65 | 100    | LS-54    | 1765919 | 9289586.00 | 1765512    | 9289683.00 |      |       |
| LS-15  | 1764900               | 9289636.00 | 176539.29 | 9289629.61 | 50     | LS-35    | 1766100 | 9289855    | 176589.96  | 9289875.03 | 100    | LS-55    | 1766483 | 9289519.00 | 1765366    | 9289590.00 |      |       |
| LS-16  | 1764920               | 9289653.00 | 176541.75 | 9289648.03 | 50     | LS-36    | 1765100 | 9289842    | 176546.40  | 9289544.04 | 100    | LS-56    | 1766564 | 9289512.00 | 1765620    | 9289584.00 |      |       |
| LS-17  | 1764950               | 9289669.00 | 176546.37 | 9289661.20 | 50     | LS-37    | 1765835 | 9289845    | 176594.51  | 9289581.74 | 100    | LS-57    | 1766564 | 9289640.00 | 1765606    | 9289559.00 |      |       |
| LS-18  | 1764900               | 9289685    | 176544.92 | 9289686.63 | 100    | LS-38    | 1765177 | 9289848    | 176624.20  | 9289594.74 | 100    | LS-58    | 1766493 | 9289470.00 | 1765606    | 9289573.00 |      |       |
| LS-19  | 1764900               | 9289685    | 176544.92 | 9289686.63 | 100    | LS-39    | 1765277 | 9289803    | 176568.16  | 9289886.14 | 100    | LS-59    | 1766498 | 9289487.00 | 1765645    | 9289572.00 |      |       |
| LS-20  | 1765120               | 9289705.00 | 176530.40 | 9289751.33 | 50     | LS-40    | 1765733 | 9289738.00 | 176591.62  | 9289836.25 | 100    | LS-60    | 1765331 | 9289490.00 | 1765495    | 9289584.00 |      |       |

[illegible]



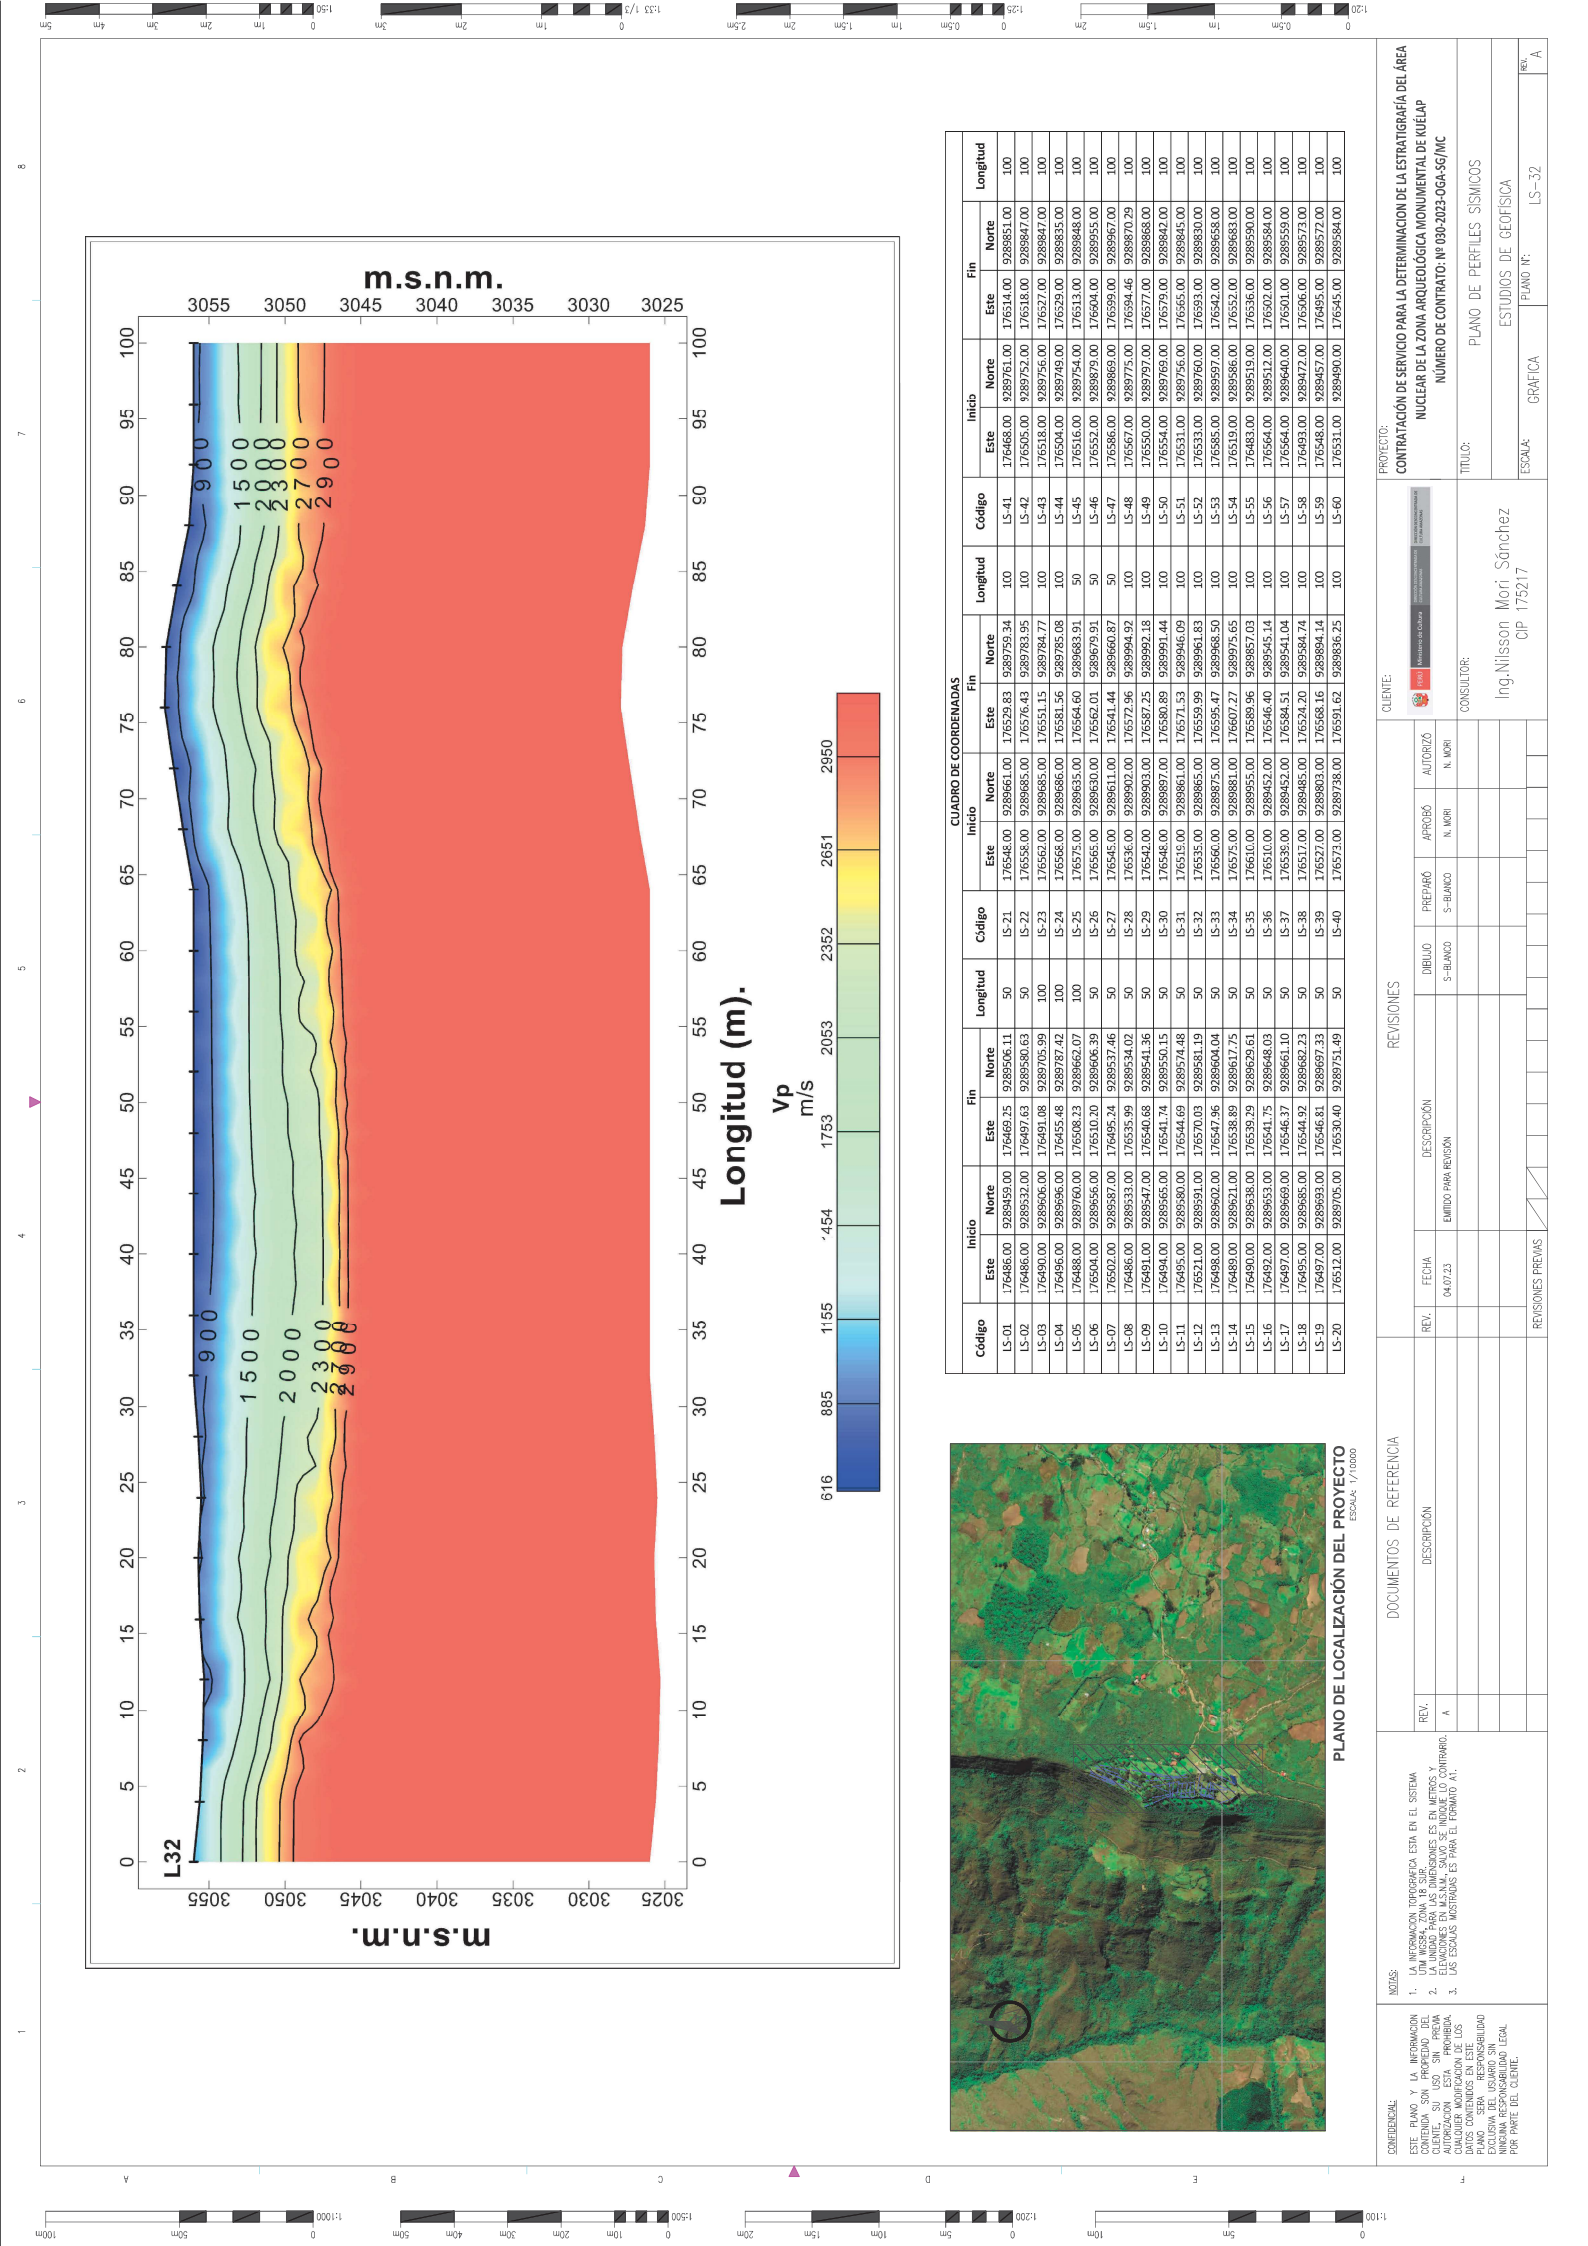

PLANO DE LOCALIZACIÓN DEL PROYECTO  
Escala 1/1000

| CUADRO DE COORDENADAS |             |              |           |            |        |          |           |            |        |          |           |
|-----------------------|-------------|--------------|-----------|------------|--------|----------|-----------|------------|--------|----------|-----------|
| Código                | Inicio Este | Inicio Norte | Fin Este  | Fin Norte  | Código | Longitud | Fin Este  | Fin Norte  | Código | Longitud | Fin Este  |
| LS-01                 | 176486.00   | 9289459.00   | 176469.25 | 9289506.11 | LS-21  | 50       | 176548.00 | 9289661.00 | LS-41  | 100      | 176514.00 |
| LS-02                 | 176486.00   | 9289532.00   | 176497.63 | 9289590.63 | LS-22  | 50       | 176552.00 | 9289685.00 | LS-42  | 100      | 176518.00 |
| LS-03                 | 176490.00   | 9289506.00   | 176491.08 | 9289705.99 | LS-23  | 100      | 176552.00 | 9289685.00 | LS-43  | 100      | 176518.00 |
| LS-04                 | 176496.00   | 9289596.00   | 176455.48 | 9289787.42 | LS-24  | 100      | 176566.00 | 9289686.00 | LS-44  | 100      | 176529.00 |
| LS-05                 | 176488.00   | 9289760.00   | 176508.23 | 9289662.07 | LS-25  | 100      | 176575.00 | 9289635.00 | LS-45  | 100      | 176513.00 |
| LS-06                 | 176504.00   | 9289556.00   | 176510.20 | 9289606.39 | LS-26  | 50       | 176575.00 | 9289635.00 | LS-46  | 100      | 176529.00 |
| LS-07                 | 176504.00   | 9289587.00   | 176495.24 | 9289637.46 | LS-27  | 50       | 176545.00 | 9289630.00 | LS-47  | 100      | 176529.00 |
| LS-08                 | 176486.00   | 9289531.00   | 176535.99 | 9289534.02 | LS-28  | 50       | 176536.00 | 9289502.00 | LS-48  | 100      | 176546.00 |
| LS-09                 | 176491.00   | 9289547.00   | 176540.68 | 9289541.36 | LS-29  | 50       | 176542.00 | 9289503.00 | LS-49  | 100      | 176550.00 |
| LS-10                 | 176494.00   | 9289565.00   | 176541.74 | 9289550.15 | LS-30  | 50       | 176542.00 | 9289503.00 | LS-50  | 100      | 176550.00 |
| LS-11                 | 176495.00   | 9289580.00   | 176544.69 | 9289574.48 | LS-31  | 50       | 176551.00 | 9289861.00 | LS-51  | 100      | 176531.00 |
| LS-12                 | 176521.00   | 9289591.00   | 176570.03 | 9289581.19 | LS-32  | 50       | 176551.00 | 9289861.00 | LS-52  | 100      | 176531.00 |
| LS-13                 | 176498.00   | 9289502.00   | 176547.96 | 9289604.04 | LS-33  | 50       | 176566.00 | 9289875.00 | LS-53  | 100      | 176535.00 |
| LS-14                 | 176489.00   | 9289521.00   | 176538.89 | 9289617.75 | LS-34  | 50       | 176575.00 | 9289881.00 | LS-54  | 100      | 176519.00 |
| LS-15                 | 176490.00   | 9289538.00   | 176539.29 | 9289629.61 | LS-35  | 50       | 176575.00 | 9289881.00 | LS-55  | 100      | 176519.00 |
| LS-16                 | 176492.00   | 9289553.00   | 176541.75 | 9289648.03 | LS-36  | 50       | 176566.00 | 9289855.00 | LS-56  | 100      | 176519.00 |
| LS-17                 | 176497.00   | 9289569.00   | 176546.37 | 9289661.10 | LS-37  | 50       | 176557.00 | 9289452.00 | LS-57  | 100      | 176564.00 |
| LS-18                 | 176495.00   | 9289585.00   | 176544.92 | 9289682.33 | LS-38  | 50       | 176557.00 | 9289452.00 | LS-58  | 100      | 176564.00 |
| LS-19                 | 176497.00   | 9289593.00   | 176546.81 | 9289697.33 | LS-39  | 50       | 176557.00 | 9289452.00 | LS-59  | 100      | 176564.00 |
| LS-20                 | 176512.00   | 9289705.00   | 176530.40 | 9289751.49 | LS-40  | 50       | 176573.00 | 9289738.00 | LS-60  | 100      | 176531.00 |

| CONFERENCIAL                                                                                                                                                                                                                                                       |                                                                                                                                                                                     | DOCUMENTOS DE REFERENCIA                                                                                                                                      |          | REVISIONES                                                         |             | CLIENTE                                                                              |          | PROYECTO                                                                                                                                                                            |            |
|--------------------------------------------------------------------------------------------------------------------------------------------------------------------------------------------------------------------------------------------------------------------|-------------------------------------------------------------------------------------------------------------------------------------------------------------------------------------|---------------------------------------------------------------------------------------------------------------------------------------------------------------|----------|--------------------------------------------------------------------|-------------|--------------------------------------------------------------------------------------|----------|-------------------------------------------------------------------------------------------------------------------------------------------------------------------------------------|------------|
| REV.                                                                                                                                                                                                                                                               | DESCRIPCIÓN                                                                                                                                                                         | REV.                                                                                                                                                          | FECHA    | FECHA                                                              | DESCRIPCIÓN | DEBILLO                                                                              | PREPARO  | APROBADO                                                                                                                                                                            | AUTORIZADO |
| A                                                                                                                                                                                                                                                                  | 1. LA INFORMACION TOPOGRAFICA ESTA EN EL SISTEMA UTM NISPA, ZONA 18 SUR, DATUM DE 1984, ELEVACIONES EN METROS, ELABORADAS POR LAS ANTO S.A.S. EN EL CONTRATO.                       |                                                                                                                                                               | 04/07/23 |                                                                    |             | S-BLANCO                                                                             | S-BLANCO | N. MORI                                                                                                                                                                             | N. MORI    |
|                                                                                                                                                                                                                                                                    | 2. LAS ELEVACIONES EN LAS ANTO S.A.S. SE ENCONTRAN EN EL CONTRATO.                                                                                                                  |                                                                                                                                                               |          |                                                                    |             |                                                                                      |          |                                                                                                                                                                                     |            |
|                                                                                                                                                                                                                                                                    | 3. LAS ELEVACIONES MOSTRADAS EN ESTE PLANO SON LAS DE LA ANTO S.A.S. EN EL CONTRATO.                                                                                                |                                                                                                                                                               |          |                                                                    |             |                                                                                      |          |                                                                                                                                                                                     |            |
|                                                                                                                                                                                                                                                                    | 4. EL PLANO DE LOCALIZACION DEL PROYECTO ES UN PLANO DE LOCALIZACION GENERAL, SIN DETALLE, POR LO QUE LA RESPONSABILIDAD DE LA INFORMACION LEGAL CORRESPONDE POR PARTE DEL CLIENTE. |                                                                                                                                                               |          |                                                                    |             |                                                                                      |          |                                                                                                                                                                                     |            |
| NOTAS:                                                                                                                                                                                                                                                             |                                                                                                                                                                                     | 1. LA INFORMACION TOPOGRAFICA ESTA EN EL SISTEMA UTM NISPA, ZONA 18 SUR, DATUM DE 1984, ELEVACIONES EN METROS, ELABORADAS POR LAS ANTO S.A.S. EN EL CONTRATO. |          | 2. LAS ELEVACIONES EN LAS ANTO S.A.S. SE ENCONTRAN EN EL CONTRATO. |             | 3. LAS ELEVACIONES MOSTRADAS EN ESTE PLANO SON LAS DE LA ANTO S.A.S. EN EL CONTRATO. |          | 4. EL PLANO DE LOCALIZACION DEL PROYECTO ES UN PLANO DE LOCALIZACION GENERAL, SIN DETALLE, POR LO QUE LA RESPONSABILIDAD DE LA INFORMACION LEGAL CORRESPONDE POR PARTE DEL CLIENTE. |            |
| ESTE PLANO Y LA INFORMACION CONTENIDA SON PROPIEDAD DEL CLIENTE. SU USO SIN PERMISO DE LAS ANTO S.A.S. CONLLEVA A LA RESPONSABILIDAD DE LOS DATOS CONTENIDOS EN ESTE PLANO. LAS ANTO S.A.S. NO SE RESPONSABILIZA POR LA INFORMACION LEGAL CONTENIDA EN ESTE PLANO. |                                                                                                                                                                                     | 1. LA INFORMACION TOPOGRAFICA ESTA EN EL SISTEMA UTM NISPA, ZONA 18 SUR, DATUM DE 1984, ELEVACIONES EN METROS, ELABORADAS POR LAS ANTO S.A.S. EN EL CONTRATO. |          | 2. LAS ELEVACIONES EN LAS ANTO S.A.S. SE ENCONTRAN EN EL CONTRATO. |             | 3. LAS ELEVACIONES MOSTRADAS EN ESTE PLANO SON LAS DE LA ANTO S.A.S. EN EL CONTRATO. |          | 4. EL PLANO DE LOCALIZACION DEL PROYECTO ES UN PLANO DE LOCALIZACION GENERAL, SIN DETALLE, POR LO QUE LA RESPONSABILIDAD DE LA INFORMACION LEGAL CORRESPONDE POR PARTE DEL CLIENTE. |            |
| TITULO:                                                                                                                                                                                                                                                            |                                                                                                                                                                                     | Ing. Nilsson Mori Sánchez                                                                                                                                     |          | CIP 175217                                                         |             | CONSULTOR:                                                                           |          | PLANO DE PERFILES SISMICOS                                                                                                                                                          |            |
| ESCALA:                                                                                                                                                                                                                                                            |                                                                                                                                                                                     | GRAFICA                                                                                                                                                       |          | PLANO Nº:                                                          |             | LS-32                                                                                |          | ESTUDIOS DE GEOFISICA                                                                                                                                                               |            |
| REV.                                                                                                                                                                                                                                                               |                                                                                                                                                                                     | A                                                                                                                                                             |          | A                                                                  |             | A                                                                                    |          | A                                                                                                                                                                                   |            |

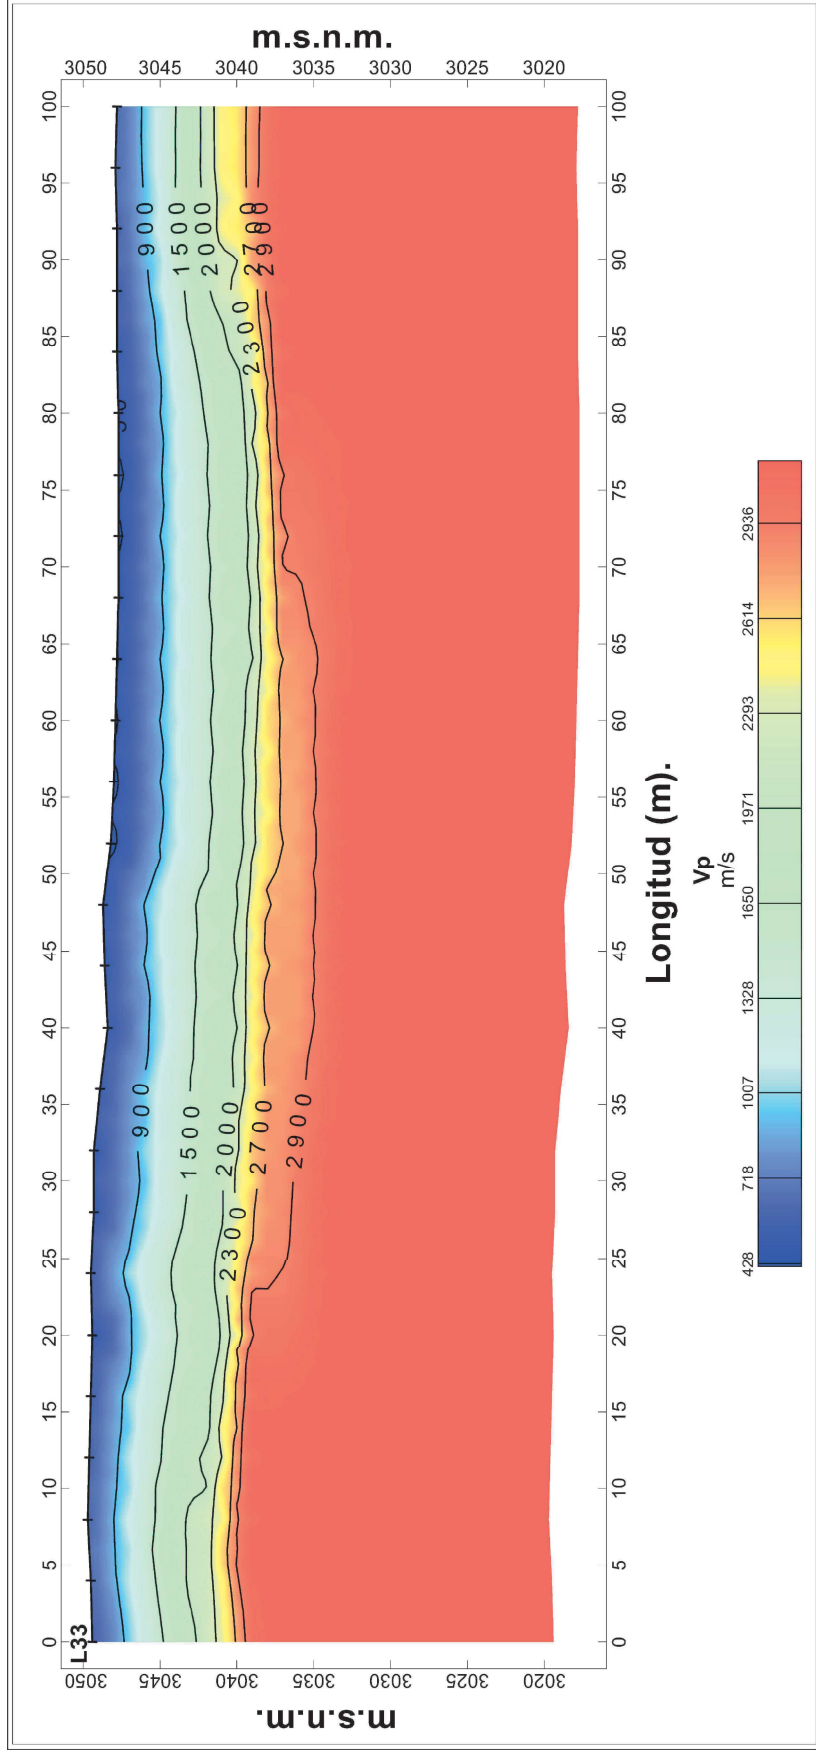

**PLANO DE LOCALIZACIÓN DEL PROYECTO**  
ESCALA: 1/10000

| Código | CUADRO DE COORDENADAS |            |           |            |       |          |         |            |            |            |      |       |          |            | Longitud |            |     |
|--------|-----------------------|------------|-----------|------------|-------|----------|---------|------------|------------|------------|------|-------|----------|------------|----------|------------|-----|
|        | Inicio                |            |           | Fin        |       |          | Código  | Inicio     |            |            | Fin  |       |          | Código     |          |            |     |
|        | Este                  | Norte      | Longitud  | Este       | Norte | Longitud |         | Este       | Norte      | Longitud   | Este | Norte | Longitud |            |          |            |     |
| LS-01  | 1764886               | 9289459    | 1764629   | 9289506.11 | 50    | LS-21    | 1765438 | 9289861    | 1765239    | 9289739.34 | 100  | LS-41 | 1765488  | 9289761.00 | 1765348  | 9289881.00 | 100 |
| LS-02  | 1764886               | 9289532.34 | 176497.63 | 9289509.63 | 50    | LS-22    | 1765538 | 9289885    | 1765766.43 | 9289739.35 | 100  | LS-42 | 1765608  | 9289752.00 | 1765318  | 9289847.00 | 100 |
| LS-03  | 1764900               | 9289506.96 | 176491.88 | 9289709.99 | 100   | LS-23    | 1765642 | 9289886    | 176581.55  | 9289784.77 | 100  | LS-43 | 1765618  | 9289756.00 | 1765277  | 9289847.00 | 100 |
| LS-04  | 1764900               | 9289506.96 | 176491.88 | 9289709.99 | 100   | LS-24    | 1765648 | 9289886    | 176581.55  | 9289785.08 | 100  | LS-44 | 1765604  | 9289748.00 | 1765269  | 9289847.00 | 100 |
| LS-05  | 1764888               | 9289760.00 | 176508.23 | 9289662.07 | 100   | LS-25    | 1765750 | 9289895.00 | 1765646.00 | 9289683.91 | 50   | LS-45 | 1765616  | 9289754.00 | 1765310  | 9289848.00 | 100 |
| LS-06  | 1765044               | 9289636.56 | 176510.20 | 9289606.39 | 50    | LS-26    | 1765865 | 9289930.00 | 1765621.00 | 9289679.91 | 50   | LS-46 | 1765572  | 9288970.00 | 1765044  | 9289955.00 | 100 |
| LS-07  | 1765020               | 9289587.47 | 176495.24 | 9289537.46 | 50    | LS-27    | 1765945 | 9289861.00 | 1765441.00 | 9289640.87 | 50   | LS-47 | 1765686  | 9289886.00 | 1765694  | 9289967.00 | 100 |
| LS-08  | 1764886               | 9289532.34 | 176535.99 | 9289534.36 | 50    | LS-28    | 1765636 | 9289902.00 | 1765792.96 | 9289994.92 | 100  | LS-48 | 1765607  | 9289755.00 | 1765346  | 9289870.29 | 100 |
| LS-09  | 1764900               | 9289547.00 | 176540.68 | 9289541.36 | 50    | LS-29    | 1765442 | 9289903.00 | 1765872.95 | 9289992.18 | 100  | LS-49 | 1765500  | 9289797.00 | 1765570  | 9289868.00 | 100 |
| LS-10  | 1764904               | 9289565.60 | 176541.74 | 9289550.48 | 50    | LS-30    | 1765448 | 9289897.00 | 1765801.89 | 9289991.44 | 100  | LS-50 | 1765544  | 9289769.00 | 1765779  | 9289842.00 | 100 |
| LS-11  | 1764955               | 9289530.00 | 176540.68 | 9289550.48 | 50    | LS-31    | 1765515 | 9289861.00 | 1765751.53 | 9289964.09 | 100  | LS-51 | 1765301  | 9289756.00 | 1765655  | 9289845.00 | 100 |
| LS-12  | 1765210               | 9289591.00 | 176520.67 | 9289584.19 | 50    | LS-32    | 1765536 | 9289865.00 | 1765599.83 | 9289961.83 | 100  | LS-52 | 1765333  | 9289760.00 | 1765633  | 9289830.00 | 100 |
| LS-13  | 1764908               | 9289602.00 | 176547.96 | 9289604.04 | 50    | LS-33    | 1765646 | 9289875.00 | 176595.47  | 9289968.94 | 100  | LS-53 | 1765885  | 9289597.00 | 1765492  | 9289658.00 | 100 |
| LS-14  | 1764908               | 9289621.00 | 176538.89 | 9289617.75 | 50    | LS-34    | 1765755 | 9289881.00 | 176607.27  | 9289975.65 | 100  | LS-54 | 1765913  | 9289586.00 | 1765522  | 9289683.00 | 100 |
| LS-15  | 1764900               | 9289636.56 | 176539.29 | 9289629.61 | 50    | LS-35    | 1766010 | 9289955.00 | 1765893.96 | 9289875.03 | 100  | LS-55 | 1766483  | 9289515.00 | 1765366  | 9289590.00 | 100 |
| LS-16  | 1764920               | 9289653.00 | 176541.75 | 9289648.03 | 50    | LS-36    | 1765510 | 9289847.00 | 1765464.00 | 9289545.14 | 100  | LS-56 | 1766564  | 9289512.00 | 1765620  | 9289584.00 | 100 |
| LS-17  | 1764900               | 9289669.00 | 176546.37 | 9289661.20 | 50    | LS-37    | 1765638 | 9289852.00 | 176594.51  | 9289584.04 | 100  | LS-57 | 1766564  | 9289640.00 | 1765606  | 9289559.00 | 100 |
| LS-18  | 1764905               | 9289685.00 | 176544.92 | 9289682.63 | 50    | LS-38    | 1765517 | 9289848.00 | 1765424.00 | 9289584.74 | 100  | LS-58 | 1766493  | 9289470.00 | 1765606  | 9289573.00 | 100 |
| LS-19  | 1764907               | 9289705.00 | 176546.81 | 9289697.33 | 50    | LS-39    | 1765627 | 9289803.00 | 1765681.66 | 9289886.14 | 100  | LS-59 | 1766498  | 9289487.00 | 1766495  | 9289572.00 | 100 |
| LS-20  | 1765102               | 9289700.00 | 176530.40 | 9289751.49 | 50    | LS-40    | 1765733 | 9289738.00 | 176591.62  | 9289836.25 | 100  | LS-60 | 1765301  | 9289490.00 | 1766495  | 9289584.00 | 100 |

[illegible]



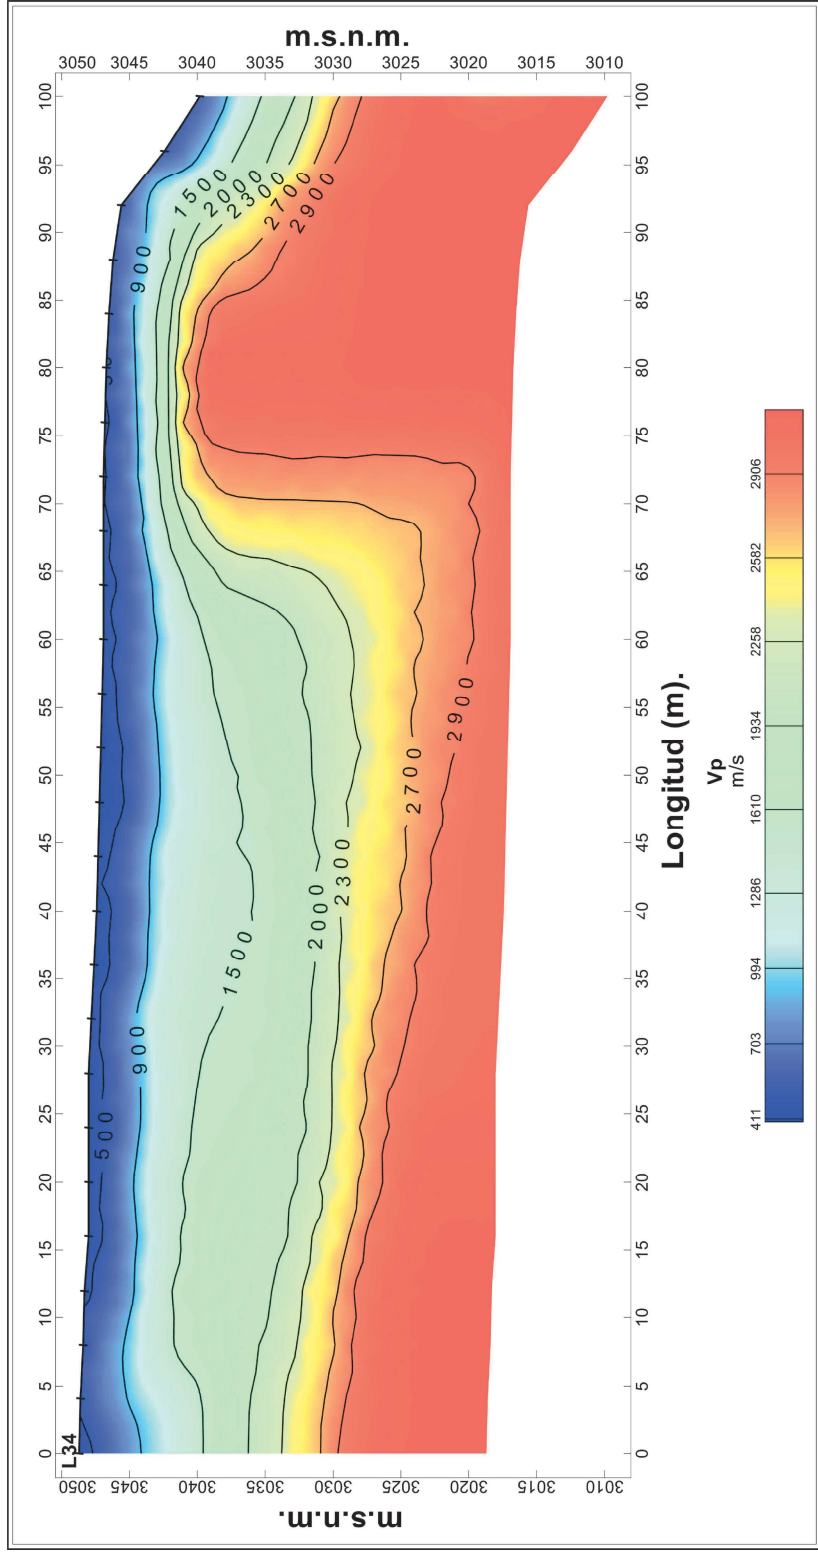

**PLANO DE LOCALIZACIÓN DEL PROYECTO**  
ESCALA: 1/10000

| CUADRO DE COORDENADAS |         |            |         |            |      |       |          |         |         |            |      |       |         |            |          |            |        |       |         |            |         |            |
|-----------------------|---------|------------|---------|------------|------|-------|----------|---------|---------|------------|------|-------|---------|------------|----------|------------|--------|-------|---------|------------|---------|------------|
| Código                | Inicio  |            |         | Fin        |      |       | Longitud | Código  | Inicio  |            |      | Fin   |         |            | Longitud | Código     | Inicio |       |         | Fin        |         |            |
|                       | Este    | Norte      | Este    | Norte      | Este | Norte |          |         | Este    | Norte      | Este | Norte | Este    | Norte      |          |            | Este   | Norte | Este    | Norte      |         |            |
| LS-01                 | 1764886 | 9289459    | 1764692 | 9289506.11 | 50   | LS-21 | 1765438  | 9289861 | 1765238 | 9289759.34 | 100  | LS-41 | 1764848 | 9289761.01 | 1765314  | 9289881.00 | 100    | LS-61 | 1764886 | 9289459    | 1764692 | 9289506.11 |
| LS-02                 | 1764886 | 9289532.00 | 1764937 | 9289589.63 | 50   | LS-22 | 1765438  | 9289865 | 1765736 | 9289783.71 | 100  | LS-42 | 1765005 | 9289752.00 | 1765188  | 9289847.00 | 100    | LS-62 | 1764886 | 9289532.00 | 1764937 | 9289589.63 |
| LS-03                 | 1764901 | 9289605.00 | 1764901 | 9289709.99 | 100  | LS-23 | 1765627  | 9289886 | 1765511 | 9289784.77 | 100  | LS-43 | 1765188 | 9289756.00 | 1765277  | 9289847.00 | 100    | LS-63 | 1764901 | 9289605.00 | 1764901 | 9289709.99 |
| LS-04                 | 1764901 | 9289605.00 | 1764958 | 9289782.42 | 100  | LS-24 | 1765628  | 9289886 | 1765581 | 9289785.08 | 100  | LS-44 | 1765004 | 9289728.00 | 1765299  | 9289835.00 | 100    | LS-64 | 1764901 | 9289605.00 | 1764958 | 9289782.42 |
| LS-05                 | 1764888 | 9289760.00 | 1765082 | 9289662.07 | 100  | LS-25 | 1765753  | 9289895 | 1765640 | 9289683.91 | 50   | LS-45 | 1765160 | 9289754.00 | 1765310  | 9289848.00 | 100    | LS-65 | 1764888 | 9289760.00 | 1765082 | 9289662.07 |
| LS-06                 | 1765044 | 9289636.00 | 1765120 | 9289606.39 | 50   | LS-26 | 1765905  | 9289830 | 1765621 | 9289679.91 | 50   | LS-46 | 1765322 | 9289870.00 | 1765404  | 9289957.00 | 100    | LS-66 | 1765044 | 9289636.00 | 1765120 | 9289606.39 |
| LS-07                 | 1765020 | 9289587.00 | 1764905 | 9289537.46 | 50   | LS-27 | 1765405  | 9289861 | 1765441 | 9289604.87 | 100  | LS-47 | 1765886 | 9289868.00 | 1765900  | 9289967.00 | 100    | LS-67 | 1765020 | 9289587.00 | 1764905 | 9289537.46 |
| LS-08                 | 1764886 | 9289534.00 | 1765339 | 9289534.06 | 50   | LS-28 | 1765336  | 9289802 | 1765736 | 9289994.92 | 100  | LS-48 | 1765657 | 9289775.00 | 1765934  | 9289870.29 | 100    | LS-68 | 1764886 | 9289534.00 | 1765339 | 9289534.06 |
| LS-09                 | 1764901 | 9289547.00 | 1765408 | 9289541.36 | 50   | LS-29 | 1765420  | 9289803 | 1765872 | 9289992.18 | 100  | LS-49 | 1765500 | 9289797.00 | 1765770  | 9289868.00 | 100    | LS-69 | 1764901 | 9289547.00 | 1765408 | 9289541.36 |
| LS-10                 | 1764901 | 9289565.00 | 1765401 | 9289548.57 | 50   | LS-30 | 1765408  | 9289897 | 1765801 | 9289991.44 | 100  | LS-50 | 1765544 | 9289769.00 | 1765790  | 9289842.00 | 100    | LS-70 | 1764901 | 9289565.00 | 1765401 | 9289548.57 |
| LS-11                 | 1764955 | 9289580.00 | 1765474 | 9289574.48 | 50   | LS-31 | 1765150  | 9289861 | 1765713 | 9289944.09 | 100  | LS-51 | 1765331 | 9289756.00 | 1765655  | 9289845.00 | 100    | LS-71 | 1764955 | 9289580.00 | 1765474 | 9289574.48 |
| LS-12                 | 1765210 | 9289591    | 1765703 | 9289581.19 | 50   | LS-32 | 1765335  | 9289865 | 1765592 | 9289961.83 | 100  | LS-52 | 1765333 | 9289760.00 | 1765632  | 9289830.00 | 100    | LS-72 | 1765210 | 9289591    | 1765703 | 9289581.19 |
| LS-13                 | 1764988 | 9289602    | 1765427 | 9289604.04 | 50   | LS-33 | 1765600  | 9289875 | 1765597 | 9289968.00 | 100  | LS-53 | 1765885 | 9289897.00 | 1765943  | 9289858.00 | 100    | LS-73 | 1764988 | 9289602    | 1765427 | 9289604.04 |
| LS-14                 | 1764980 | 9289621    | 1765388 | 928661.75  | 50   | LS-34 | 1765755  | 9289881 | 1766027 | 9289975.65 | 100  | LS-54 | 1765193 | 9289586.00 | 1765532  | 9289683.00 | 100    | LS-74 | 1764980 | 9289621    | 1765388 | 928661.75  |
| LS-15                 | 1764900 | 9289638    | 1765379 | 9289629.61 | 50   | LS-35 | 1765100  | 9289857 | 1765893 | 9289677.03 | 100  | LS-55 | 1764831 | 9289515.00 | 1765336  | 9289590.00 | 100    | LS-75 | 1764900 | 9289638    | 1765379 | 9289629.61 |
| LS-16                 | 1764920 | 9289653    | 1765471 | 9289648.03 | 50   | LS-36 | 1765100  | 9289845 | 1765406 | 9289545.04 | 100  | LS-56 | 1765604 | 9289512.00 | 1765620  | 9289584.00 | 100    | LS-76 | 1764920 | 9289653    | 1765471 | 9289648.03 |
| LS-17                 | 1764900 | 9289669    | 1765466 | 9289661.20 | 50   | LS-37 | 1765330  | 9289845 | 1765841 | 9289574.00 | 100  | LS-57 | 1765654 | 9289640.00 | 1765690  | 9289559.00 | 100    | LS-77 | 1764900 | 9289669    | 1765466 | 9289661.20 |
| LS-18                 | 1764900 | 9289685    | 1765492 | 9289682.63 | 50   | LS-38 | 1765177  | 9289848 | 1765424 | 9289584.74 | 100  | LS-58 | 1764930 | 9289427.00 | 1765066  | 9289573.00 | 100    | LS-78 | 1764900 | 9289685    | 1765492 | 9289682.63 |
| LS-19                 | 1764900 | 9289703    | 1765466 | 9289697.33 | 50   | LS-39 | 1765277  | 9289803 | 1765681 | 9289884.14 | 100  | LS-59 | 1764848 | 9289497.00 | 1764965  | 9289572.00 | 100    | LS-79 | 1764900 | 9289703    | 1765466 | 9289697.33 |
| LS-20                 | 1765120 | 9289700.00 | 1765400 | 9289700.00 | 50   | LS-40 | 1765733  | 9289830 | 1765931 | 9289836.25 | 100  | LS-60 | 1765331 | 9289756.00 | 1765655  | 9289845.00 | 100    | LS-80 | 1765120 | 9289700.00 | 1765400 | 9289700.00 |

| <div>SOBRESEAL:</div> <div>ESTE PLANO Y LA INFORMACION QUE CONTIENE SON DE PROPIEDAD DEL CLIENTE. SE PROHIBEN LA REPRODUCCION, AUTORIZACION, ESTAMPADO, COPIADO, FOTOCOPIADO, FOTODUPLICADO, FOTOGRAFIA, O CUALQUIER OTRO TIPO DE REPRODUCCION O DIFUSION DE LOS DATOS CONTENIDOS EN ESTE PLANO. SERA RESPONSABILIDAD DEL CLIENTE LA PROTECCION Y LA INICIATIVA RESPONSABILIDAD LEGAL POR PARTE DEL CLIENTE.</div> | <div>NOTAS:</div> <div>1. LA INFORMACION TOPOGRAFICA ESTA EN EL SISTEMA UTM.</div> <div>2. LA UNIDAD PARA LAS DIMENSIONES ES EN METROS Y MILIMETROS.</div> <div>3. LOS DATOS EN ESTE PLANO SE TOMARON DEL CONTRATO.</div> <div>4. LOS DATOS MANTENIDOS EN EL PLANO EL DIBUJO EN A.</div> | <div>DOCUMENTOS DE REFERENCIA</div> <table><thead><tr><th>REV.</th><th>DESCRIPCION</th></tr></thead><tbody><tr><td>A</td><td></td></tr><tr><td></td><td></td></tr><tr><td></td><td></td></tr><tr><td></td><td></td></tr></tbody></table> |             |          |          |          |  | REV. | DESCRIPCION | A |  |  |  |  |  |  |  | <div>REVISIONES</div> <table><thead><tr><th>REV.</th><th>FECHA</th><th>DESCRIPCION</th><th>ELABO</th><th>PREPARO</th><th>APROBADO</th><th>AUTORIZO</th></tr></thead><tbody><tr><td></td><td>04/07/23</td><td>EMITIDO PARA REVISION</td><td>S-BLANCO</td><td>S-BLANCO</td><td>N. MORI</td><td>N. MORI</td></tr><tr><td></td><td></td><td></td><td></td><td></td><td></td><td></td></tr><tr><td></td><td></td><td></td><td></td><td></td><td></td><td></td></tr><tr><td></td><td></td><td></td><td></td><td></td><td></td><td></td></tr></tbody></table> |  |  |  |  |  | REV. | FECHA | DESCRIPCION | ELABO | PREPARO | APROBADO | AUTORIZO |  | 04/07/23 | EMITIDO PARA REVISION | S-BLANCO | S-BLANCO | N. MORI | N. MORI |  |  |  |  |  |  |  |  |  |  |  |  |  |  |  |  |  |  |  |  |  | <div>CLIENTE:</div> <div><div></div><div>Ing. Nilsson Mori Sánchez</div><div>CIP 175217</div></div> | <div>PROYECTO:</div> <div>CONTRATACIÓN DE SERVICIO PARA LA DETERMINACIÓN DE LA ESTRATIGRAFÍA DEL ÁREA NUCLEAR DE LA ZONA ARQUEOLÓGICA MONUMENTAL DE KUÉLAP</div> <div>NÚMERO DE CONTRATO: N° 030-0223-0GR-SG/MC</div> <div>TÍTULO:</div> <div>PLANO DE PERFILES SISMICOS</div> | <div>ESCALA:</div> <div>GRAFICA</div> | <div>PLANO N°:</div> <div>LS-34</div> | <div>REV. A</div> |
|--------------------------------------------------------------------------------------------------------------------------------------------------------------------------------------------------------------------------------------------------------------------------------------------------------------------------------------------------------------------------------------------------------------------|------------------------------------------------------------------------------------------------------------------------------------------------------------------------------------------------------------------------------------------------------------------------------------------|------------------------------------------------------------------------------------------------------------------------------------------------------------------------------------------------------------------------------------------|-------------|----------|----------|----------|--|------|-------------|---|--|--|--|--|--|--|--|--------------------------------------------------------------------------------------------------------------------------------------------------------------------------------------------------------------------------------------------------------------------------------------------------------------------------------------------------------------------------------------------------------------------------------------------------------------------------------------------------------------------------------------------------------|--|--|--|--|--|------|-------|-------------|-------|---------|----------|----------|--|----------|-----------------------|----------|----------|---------|---------|--|--|--|--|--|--|--|--|--|--|--|--|--|--|--|--|--|--|--|--|--|----------------------------------------------------------------------------------------------------------------------------------------------------------------------------------------|--------------------------------------------------------------------------------------------------------------------------------------------------------------------------------------------------------------------------------------------------------------------------------|---------------------------------------|---------------------------------------|-------------------|
|                                                                                                                                                                                                                                                                                                                                                                                                                    |                                                                                                                                                                                                                                                                                          | REV.                                                                                                                                                                                                                                     | DESCRIPCION |          |          |          |  |      |             |   |  |  |  |  |  |  |  |                                                                                                                                                                                                                                                                                                                                                                                                                                                                                                                                                        |  |  |  |  |  |      |       |             |       |         |          |          |  |          |                       |          |          |         |         |  |  |  |  |  |  |  |  |  |  |  |  |  |  |  |  |  |  |  |  |  |                                                                                                                                                                                        |                                                                                                                                                                                                                                                                                |                                       |                                       |                   |
|                                                                                                                                                                                                                                                                                                                                                                                                                    |                                                                                                                                                                                                                                                                                          | A                                                                                                                                                                                                                                        |             |          |          |          |  |      |             |   |  |  |  |  |  |  |  |                                                                                                                                                                                                                                                                                                                                                                                                                                                                                                                                                        |  |  |  |  |  |      |       |             |       |         |          |          |  |          |                       |          |          |         |         |  |  |  |  |  |  |  |  |  |  |  |  |  |  |  |  |  |  |  |  |  |                                                                                                                                                                                        |                                                                                                                                                                                                                                                                                |                                       |                                       |                   |
|                                                                                                                                                                                                                                                                                                                                                                                                                    |                                                                                                                                                                                                                                                                                          |                                                                                                                                                                                                                                          |             |          |          |          |  |      |             |   |  |  |  |  |  |  |  |                                                                                                                                                                                                                                                                                                                                                                                                                                                                                                                                                        |  |  |  |  |  |      |       |             |       |         |          |          |  |          |                       |          |          |         |         |  |  |  |  |  |  |  |  |  |  |  |  |  |  |  |  |  |  |  |  |  |                                                                                                                                                                                        |                                                                                                                                                                                                                                                                                |                                       |                                       |                   |
|                                                                                                                                                                                                                                                                                                                                                                                                                    |                                                                                                                                                                                                                                                                                          |                                                                                                                                                                                                                                          |             |          |          |          |  |      |             |   |  |  |  |  |  |  |  |                                                                                                                                                                                                                                                                                                                                                                                                                                                                                                                                                        |  |  |  |  |  |      |       |             |       |         |          |          |  |          |                       |          |          |         |         |  |  |  |  |  |  |  |  |  |  |  |  |  |  |  |  |  |  |  |  |  |                                                                                                                                                                                        |                                                                                                                                                                                                                                                                                |                                       |                                       |                   |
|                                                                                                                                                                                                                                                                                                                                                                                                                    |                                                                                                                                                                                                                                                                                          |                                                                                                                                                                                                                                          |             |          |          |          |  |      |             |   |  |  |  |  |  |  |  |                                                                                                                                                                                                                                                                                                                                                                                                                                                                                                                                                        |  |  |  |  |  |      |       |             |       |         |          |          |  |          |                       |          |          |         |         |  |  |  |  |  |  |  |  |  |  |  |  |  |  |  |  |  |  |  |  |  |                                                                                                                                                                                        |                                                                                                                                                                                                                                                                                |                                       |                                       |                   |
| REV.                                                                                                                                                                                                                                                                                                                                                                                                               | FECHA                                                                                                                                                                                                                                                                                    | DESCRIPCION                                                                                                                                                                                                                              | ELABO       | PREPARO  | APROBADO | AUTORIZO |  |      |             |   |  |  |  |  |  |  |  |                                                                                                                                                                                                                                                                                                                                                                                                                                                                                                                                                        |  |  |  |  |  |      |       |             |       |         |          |          |  |          |                       |          |          |         |         |  |  |  |  |  |  |  |  |  |  |  |  |  |  |  |  |  |  |  |  |  |                                                                                                                                                                                        |                                                                                                                                                                                                                                                                                |                                       |                                       |                   |
|                                                                                                                                                                                                                                                                                                                                                                                                                    | 04/07/23                                                                                                                                                                                                                                                                                 | EMITIDO PARA REVISION                                                                                                                                                                                                                    | S-BLANCO    | S-BLANCO | N. MORI  | N. MORI  |  |      |             |   |  |  |  |  |  |  |  |                                                                                                                                                                                                                                                                                                                                                                                                                                                                                                                                                        |  |  |  |  |  |      |       |             |       |         |          |          |  |          |                       |          |          |         |         |  |  |  |  |  |  |  |  |  |  |  |  |  |  |  |  |  |  |  |  |  |                                                                                                                                                                                        |                                                                                                                                                                                                                                                                                |                                       |                                       |                   |
|                                                                                                                                                                                                                                                                                                                                                                                                                    |                                                                                                                                                                                                                                                                                          |                                                                                                                                                                                                                                          |             |          |          |          |  |      |             |   |  |  |  |  |  |  |  |                                                                                                                                                                                                                                                                                                                                                                                                                                                                                                                                                        |  |  |  |  |  |      |       |             |       |         |          |          |  |          |                       |          |          |         |         |  |  |  |  |  |  |  |  |  |  |  |  |  |  |  |  |  |  |  |  |  |                                                                                                                                                                                        |                                                                                                                                                                                                                                                                                |                                       |                                       |                   |
|                                                                                                                                                                                                                                                                                                                                                                                                                    |                                                                                                                                                                                                                                                                                          |                                                                                                                                                                                                                                          |             |          |          |          |  |      |             |   |  |  |  |  |  |  |  |                                                                                                                                                                                                                                                                                                                                                                                                                                                                                                                                                        |  |  |  |  |  |      |       |             |       |         |          |          |  |          |                       |          |          |         |         |  |  |  |  |  |  |  |  |  |  |  |  |  |  |  |  |  |  |  |  |  |                                                                                                                                                                                        |                                                                                                                                                                                                                                                                                |                                       |                                       |                   |
|                                                                                                                                                                                                                                                                                                                                                                                                                    |                                                                                                                                                                                                                                                                                          |                                                                                                                                                                                                                                          |             |          |          |          |  |      |             |   |  |  |  |  |  |  |  |                                                                                                                                                                                                                                                                                                                                                                                                                                                                                                                                                        |  |  |  |  |  |      |       |             |       |         |          |          |  |          |                       |          |          |         |         |  |  |  |  |  |  |  |  |  |  |  |  |  |  |  |  |  |  |  |  |  |                                                                                                                                                                                        |                                                                                                                                                                                                                                                                                |                                       |                                       |                   |
|                                                                                                                                                                                                                                                                                                                                                                                                                    |                                                                                                                                                                                                                                                                                          |                                                                                                                                                                                                                                          |             |          |          |          |  |      |             |   |  |  |  |  |  |  |  |                                                                                                                                                                                                                                                                                                                                                                                                                                                                                                                                                        |  |  |  |  |  |      |       |             |       |         |          |          |  |          |                       |          |          |         |         |  |  |  |  |  |  |  |  |  |  |  |  |  |  |  |  |  |  |  |  |  |                                                                                                                                                                                        |                                                                                                                                                                                                                                                                                |                                       |                                       |                   |
|                                                                                                                                                                                                                                                                                                                                                                                                                    |                                                                                                                                                                                                                                                                                          |                                                                                                                                                                                                                                          |             |          |          |          |  |      |             |   |  |  |  |  |  |  |  |                                                                                                                                                                                                                                                                                                                                                                                                                                                                                                                                                        |  |  |  |  |  |      |       |             |       |         |          |          |  |          |                       |          |          |         |         |  |  |  |  |  |  |  |  |  |  |  |  |  |  |  |  |  |  |  |  |  |                                                                                                                                                                                        |                                                                                                                                                                                                                                                                                |                                       |                                       |                   |
|                                                                                                                                                                                                                                                                                                                                                                                                                    |                                                                                                                                                                                                                                                                                          |                                                                                                                                                                                                                                          |             |          |          |          |  |      |             |   |  |  |  |  |  |  |  |                                                                                                                                                                                                                                                                                                                                                                                                                                                                                                                                                        |  |  |  |  |  |      |       |             |       |         |          |          |  |          |                       |          |          |         |         |  |  |  |  |  |  |  |  |  |  |  |  |  |  |  |  |  |  |  |  |  |                                                                                                                                                                                        |                                                                                                                                                                                                                                                                                |                                       |                                       |                   |
|                                                                                                                                                                                                                                                                                                                                                                                                                    |                                                                                                                                                                                                                                                                                          |                                                                                                                                                                                                                                          |             |          |          |          |  |      |             |   |  |  |  |  |  |  |  |                                                                                                                                                                                                                                                                                                                                                                                                                                                                                                                                                        |  |  |  |  |  |      |       |             |       |         |          |          |  |          |                       |          |          |         |         |  |  |  |  |  |  |  |  |  |  |  |  |  |  |  |  |  |  |  |  |  |                                                                                                                                                                                        |                                                                                                                                                                                                                                                                                |                                       |                                       |                   |

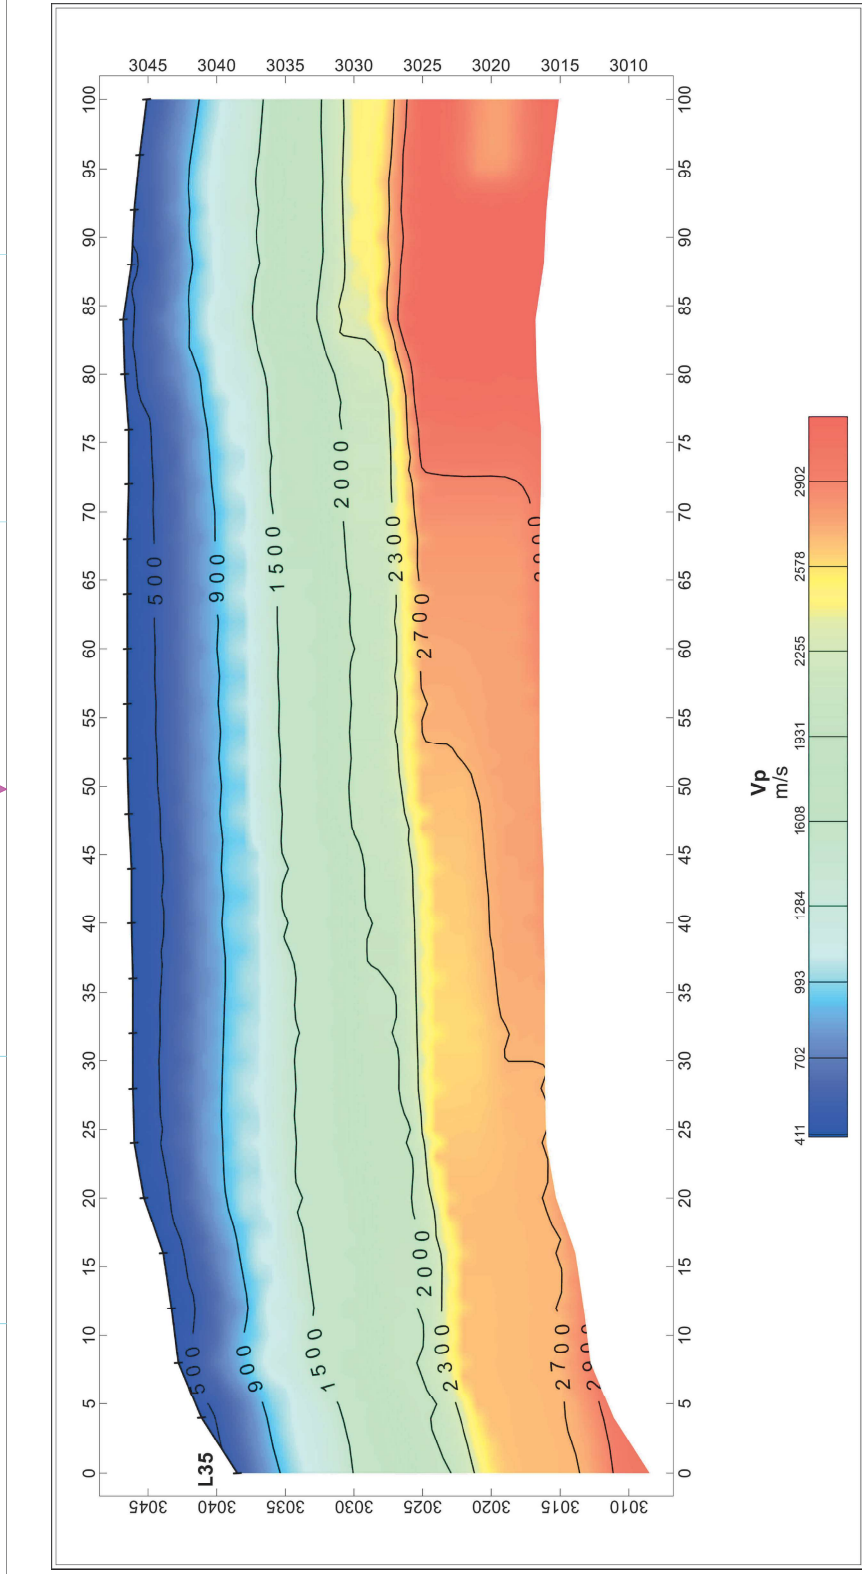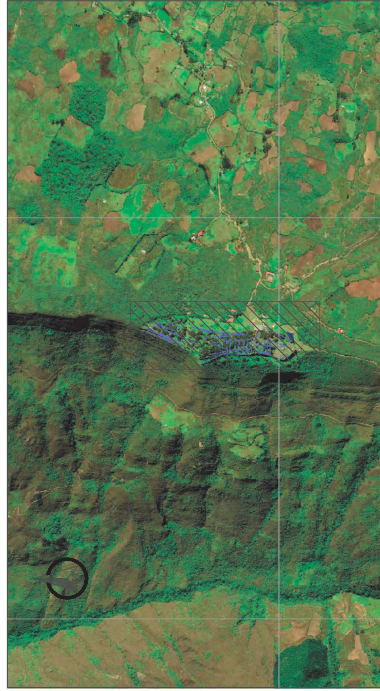

PLANO DE LOCALIZACIÓN DEL PROYECTO

| Código | CUADRO DE COORDENADAS |         |         |         |          |        |       |         |         |         | Código  | Longitud | Este | Norte | Fin     | Este    | Norte   | Inicio  | Este | Norte | Fin     | Este    | Norte   | Inicio  | Este | Norte | Fin     | Este    | Norte   | Longitud |      |       |         |         |         |         |      |       |         |         |         |         |      |       |         |         |          |         |     |       |         |         |         |         |     |       |         |         |         |         |    |     |       |         |         |         |         |    |     |       |         |         |         |         |     |       |         |         |         |         |    |     |       |         |         |         |         |    |    |       |         |         |         |         |     |       |         |         |         |         |    |     |       |         |         |         |         |    |       |         |         |         |         |     |       |         |         |         |         |    |     |       |         |         |         |         |    |     |       |         |         |         |         |     |       |         |         |         |         |    |     |       |         |         |         |         |    |     |       |         |         |         |         |     |       |         |         |         |         |    |     |       |         |         |         |         |    |     |       |         |         |         |         |     |       |         |         |         |         |    |     |       |         |         |         |         |    |     |       |         |         |         |         |     |       |         |         |         |         |    |     |       |         |         |         |         |    |     |       |         |         |         |         |     |       |         |         |         |         |    |     |       |         |         |         |         |    |     |       |         |         |         |         |     |       |         |         |         |         |    |     |       |         |         |         |         |    |     |       |         |         |         |         |     |       |         |         |         |         |    |     |       |         |         |         |         |    |     |       |         |         |         |         |     |       |         |         |         |         |    |     |       |         |         |         |         |    |     |       |         |         |         |         |     |       |         |         |         |         |    |     |       |         |         |         |         |     |       |         |         |         |         |     |       |         |         |         |         |    |     |       |         |         |         |         |    |     |       |         |         |         |         |     |       |         |         |         |         |    |     |       |         |         |         |         |    |     |       |         |         |         |         |     |       |         |         |         |         |    |     |       |         |         |         |         |    |     |       |         |         |         |         |     |       |         |         |         |         |    |     |       |         |         |         |         |    |     |       |         |         |         |         |    |     |       |         |         |         |         |    |     |       |         |         |         |         |    |     |       |         |         |         |         |    |     |       |         |         |         |         |    |     |       |         |         |         |         |    |     |       |         |         |         |         |    |     |       |         |         |         |         |    |     |       |         |         |         |         |    |     |       |         |         |         |         |    |     |       |         |         |         |         |    |     |       |         |         |         |         |    |     |       |         |         |         |         |    |     |       |         |         |         |         |    |     |       |         |         |         |         |    |     |       |         |         |         |         |    |     |       |         |         |         |         |    |     |       |         |         |         |         |    |     |       |         |         |         |         |    |     |       |         |         |         |         |    |     |       |         |         |         |         |    |     |       |         |         |         |         |    |     |       |         |         |         |         |    |     |       |         |         |         |         |    |     |       |         |         |         |         |    |     |       |         |         |         |         |    |     |       |         |         |         |         |    |     |       |         |         |         |         |    |     |       |         |         |         |         |    |     |       |         |         |         |         |    |     |       |         |         |         |         |    |     |       |         |         |         |         |    |     |       |         |         |         |         |    |     |       |         |         |         |         |    |     |       |         |         |         |         |    |     |       |         |         |         |         |    |     |       |         |         |         |         |    |     |       |         |         |         |         |    |     |       |         |         |         |         |    |     |       |         |         |         |         |    |     |       |         |         |         |         |    |     |       |         |         |         |         |    |     |       |         |         |         |         |    |     |       |         |         |         |         |    |     |       |         |         |         |         |    |     |       |         |         |         |         |    |     |       |         |         |         |         |    |     |       |         |         |         |         |    |     |       |         |         |         |         |    |     |       |         |         |         |         |    |     |       |         |         |         |         |    |     |       |         |         |         |         |    |     |       |         |         |         |         |    |     |       |         |         |         |         |    |     |       |         |         |         |         |    |     |       |         |         |         |     |
|--------|-----------------------|---------|---------|---------|----------|--------|-------|---------|---------|---------|---------|----------|------|-------|---------|---------|---------|---------|------|-------|---------|---------|---------|---------|------|-------|---------|---------|---------|----------|------|-------|---------|---------|---------|---------|------|-------|---------|---------|---------|---------|------|-------|---------|---------|----------|---------|-----|-------|---------|---------|---------|---------|-----|-------|---------|---------|---------|---------|----|-----|-------|---------|---------|---------|---------|----|-----|-------|---------|---------|---------|---------|-----|-------|---------|---------|---------|---------|----|-----|-------|---------|---------|---------|---------|----|----|-------|---------|---------|---------|---------|-----|-------|---------|---------|---------|---------|----|-----|-------|---------|---------|---------|---------|----|-------|---------|---------|---------|---------|-----|-------|---------|---------|---------|---------|----|-----|-------|---------|---------|---------|---------|----|-----|-------|---------|---------|---------|---------|-----|-------|---------|---------|---------|---------|----|-----|-------|---------|---------|---------|---------|----|-----|-------|---------|---------|---------|---------|-----|-------|---------|---------|---------|---------|----|-----|-------|---------|---------|---------|---------|----|-----|-------|---------|---------|---------|---------|-----|-------|---------|---------|---------|---------|----|-----|-------|---------|---------|---------|---------|----|-----|-------|---------|---------|---------|---------|-----|-------|---------|---------|---------|---------|----|-----|-------|---------|---------|---------|---------|----|-----|-------|---------|---------|---------|---------|-----|-------|---------|---------|---------|---------|----|-----|-------|---------|---------|---------|---------|----|-----|-------|---------|---------|---------|---------|-----|-------|---------|---------|---------|---------|----|-----|-------|---------|---------|---------|---------|----|-----|-------|---------|---------|---------|---------|-----|-------|---------|---------|---------|---------|----|-----|-------|---------|---------|---------|---------|----|-----|-------|---------|---------|---------|---------|-----|-------|---------|---------|---------|---------|----|-----|-------|---------|---------|---------|---------|----|-----|-------|---------|---------|---------|---------|-----|-------|---------|---------|---------|---------|----|-----|-------|---------|---------|---------|---------|-----|-------|---------|---------|---------|---------|-----|-------|---------|---------|---------|---------|----|-----|-------|---------|---------|---------|---------|----|-----|-------|---------|---------|---------|---------|-----|-------|---------|---------|---------|---------|----|-----|-------|---------|---------|---------|---------|----|-----|-------|---------|---------|---------|---------|-----|-------|---------|---------|---------|---------|----|-----|-------|---------|---------|---------|---------|----|-----|-------|---------|---------|---------|---------|-----|-------|---------|---------|---------|---------|----|-----|-------|---------|---------|---------|---------|----|-----|-------|---------|---------|---------|---------|----|-----|-------|---------|---------|---------|---------|----|-----|-------|---------|---------|---------|---------|----|-----|-------|---------|---------|---------|---------|----|-----|-------|---------|---------|---------|---------|----|-----|-------|---------|---------|---------|---------|----|-----|-------|---------|---------|---------|---------|----|-----|-------|---------|---------|---------|---------|----|-----|-------|---------|---------|---------|---------|----|-----|-------|---------|---------|---------|---------|----|-----|-------|---------|---------|---------|---------|----|-----|-------|---------|---------|---------|---------|----|-----|-------|---------|---------|---------|---------|----|-----|-------|---------|---------|---------|---------|----|-----|-------|---------|---------|---------|---------|----|-----|-------|---------|---------|---------|---------|----|-----|-------|---------|---------|---------|---------|----|-----|-------|---------|---------|---------|---------|----|-----|-------|---------|---------|---------|---------|----|-----|-------|---------|---------|---------|---------|----|-----|-------|---------|---------|---------|---------|----|-----|-------|---------|---------|---------|---------|----|-----|-------|---------|---------|---------|---------|----|-----|-------|---------|---------|---------|---------|----|-----|-------|---------|---------|---------|---------|----|-----|-------|---------|---------|---------|---------|----|-----|-------|---------|---------|---------|---------|----|-----|-------|---------|---------|---------|---------|----|-----|-------|---------|---------|---------|---------|----|-----|-------|---------|---------|---------|---------|----|-----|-------|---------|---------|---------|---------|----|-----|-------|---------|---------|---------|---------|----|-----|-------|---------|---------|---------|---------|----|-----|-------|---------|---------|---------|---------|----|-----|-------|---------|---------|---------|---------|----|-----|-------|---------|---------|---------|---------|----|-----|-------|---------|---------|---------|---------|----|-----|-------|---------|---------|---------|---------|----|-----|-------|---------|---------|---------|---------|----|-----|-------|---------|---------|---------|---------|----|-----|-------|---------|---------|---------|---------|----|-----|-------|---------|---------|---------|---------|----|-----|-------|---------|---------|---------|---------|----|-----|-------|---------|---------|---------|---------|----|-----|-------|---------|---------|---------|---------|----|-----|-------|---------|---------|---------|---------|----|-----|-------|---------|---------|---------|---------|----|-----|-------|---------|---------|---------|---------|----|-----|-------|---------|---------|---------|---------|----|-----|-------|---------|---------|---------|---------|----|-----|-------|---------|---------|---------|---------|----|-----|-------|---------|---------|---------|---------|----|-----|-------|---------|---------|---------|---------|----|-----|-------|---------|---------|---------|---------|----|-----|-------|---------|---------|---------|---------|----|-----|-------|---------|---------|---------|-----|
|        | Este                  | Norte   | Este    | Norte   | Longitud | Código | Este  | Norte   | Este    | Norte   |         |          |      |       |         |         |         |         |      |       |         |         |         |         |      |       |         |         |         |          | Este | Norte | Este    | Norte   | Este    | Norte   | Este | Norte | Este    | Norte   | Este    | Norte   | Este | Norte | Este    | Norte   | Longitud |         |     |       |         |         |         |         |     |       |         |         |         |         |    |     |       |         |         |         |         |    |     |       |         |         |         |         |     |       |         |         |         |         |    |     |       |         |         |         |         |    |    |       |         |         |         |         |     |       |         |         |         |         |    |     |       |         |         |         |         |    |       |         |         |         |         |     |       |         |         |         |         |    |     |       |         |         |         |         |    |     |       |         |         |         |         |     |       |         |         |         |         |    |     |       |         |         |         |         |    |     |       |         |         |         |         |     |       |         |         |         |         |    |     |       |         |         |         |         |    |     |       |         |         |         |         |     |       |         |         |         |         |    |     |       |         |         |         |         |    |     |       |         |         |         |         |     |       |         |         |         |         |    |     |       |         |         |         |         |    |     |       |         |         |         |         |     |       |         |         |         |         |    |     |       |         |         |         |         |    |     |       |         |         |         |         |     |       |         |         |         |         |    |     |       |         |         |         |         |    |     |       |         |         |         |         |     |       |         |         |         |         |    |     |       |         |         |         |         |    |     |       |         |         |         |         |     |       |         |         |         |         |    |     |       |         |         |         |         |    |     |       |         |         |         |         |     |       |         |         |         |         |    |     |       |         |         |         |         |     |       |         |         |         |         |     |       |         |         |         |         |    |     |       |         |         |         |         |    |     |       |         |         |         |         |     |       |         |         |         |         |    |     |       |         |         |         |         |    |     |       |         |         |         |         |     |       |         |         |         |         |    |     |       |         |         |         |         |    |     |       |         |         |         |         |     |       |         |         |         |         |    |     |       |         |         |         |         |    |     |       |         |         |         |         |    |     |       |         |         |         |         |    |     |       |         |         |         |         |    |     |       |         |         |         |         |    |     |       |         |         |         |         |    |     |       |         |         |         |         |    |     |       |         |         |         |         |    |     |       |         |         |         |         |    |     |       |         |         |         |         |    |     |       |         |         |         |         |    |     |       |         |         |         |         |    |     |       |         |         |         |         |    |     |       |         |         |         |         |    |     |       |         |         |         |         |    |     |       |         |         |         |         |    |     |       |         |         |         |         |    |     |       |         |         |         |         |    |     |       |         |         |         |         |    |     |       |         |         |         |         |    |     |       |         |         |         |         |    |     |       |         |         |         |         |    |     |       |         |         |         |         |    |     |       |         |         |         |         |    |     |       |         |         |         |         |    |     |       |         |         |         |         |    |     |       |         |         |         |         |    |     |       |         |         |         |         |    |     |       |         |         |         |         |    |     |       |         |         |         |         |    |     |       |         |         |         |         |    |     |       |         |         |         |         |    |     |       |         |         |         |         |    |     |       |         |         |         |         |    |     |       |         |         |         |         |    |     |       |         |         |         |         |    |     |       |         |         |         |         |    |     |       |         |         |         |         |    |     |       |         |         |         |         |    |     |       |         |         |         |         |    |     |       |         |         |         |         |    |     |       |         |         |         |         |    |     |       |         |         |         |         |    |     |       |         |         |         |         |    |     |       |         |         |         |         |    |     |       |         |         |         |         |    |     |       |         |         |         |         |    |     |       |         |         |         |         |    |     |       |         |         |         |         |    |     |       |         |         |         |         |    |     |       |         |         |         |         |    |     |       |         |         |         |         |    |     |       |         |         |         |         |    |     |       |         |         |         |         |    |     |       |         |         |         |         |    |     |       |         |         |         |         |    |     |       |         |         |         |     |
| L5-01  | 1764808               | 9289459 | 1764693 | 9289506 | 111      | 50     | L5-21 | 1765348 | 9289861 | 1765293 | 9289753 | 34       | 100  | L5-41 | 1767408 | 9289761 | 1767310 | 9289685 | 100  | L5-02 | 1764808 | 9289532 | 1764697 | 9289511 | 100  | L5-22 | 1765358 | 9289865 | 1765296 | 9289754  | 100  | L5-42 | 1767408 | 9289761 | 1767310 | 9289685 | 100  | L5-03 | 1764808 | 9289536 | 1764697 | 9289509 | 100  | L5-23 | 1765368 | 9289866 | 1765297  | 9289755 | 100 | L5-43 | 1767408 | 9289761 | 1767310 | 9289685 | 100 | L5-04 | 1764808 | 9289536 | 1764655 | 9289787 | 42 | 100 | L5-24 | 1765368 | 9289866 | 1765281 | 9289758 | 08 | 100 | L5-44 | 1767408 | 9289761 | 1767310 | 9289685 | 100 | L5-05 | 1764808 | 9289536 | 1765008 | 9289666 | 07 | 100 | L5-25 | 1765368 | 9289863 | 1765460 | 9289683 | 91 | 50 | L5-45 | 1767408 | 9289761 | 1767310 | 9289685 | 100 | L5-06 | 1764808 | 9289536 | 1765120 | 9289666 | 39 | 100 | L5-26 | 1765368 | 9289863 | 1765462 | 9289691 | 50 | L5-46 | 1767408 | 9289761 | 1767310 | 9289685 | 100 | L5-07 | 1764808 | 9289537 | 1764952 | 9289834 | 46 | 100 | L5-27 | 1765368 | 9289861 | 1765461 | 9289687 | 40 | 100 | L5-47 | 1767408 | 9289761 | 1767310 | 9289685 | 100 | L5-08 | 1764808 | 9289537 | 1765349 | 9289834 | 46 | 100 | L5-28 | 1765368 | 9289862 | 1765372 | 9289694 | 92 | 100 | L5-48 | 1767408 | 9289761 | 1767310 | 9289685 | 100 | L5-09 | 1764808 | 9289547 | 1765408 | 9289841 | 36 | 100 | L5-29 | 1765368 | 9289863 | 1765387 | 9289692 | 18 | 100 | L5-49 | 1767408 | 9289761 | 1767310 | 9289685 | 100 | L5-10 | 1764808 | 9289545 | 1765414 | 9289850 | 15 | 100 | L5-30 | 1765368 | 9289867 | 1765389 | 9289694 | 44 | 100 | L5-50 | 1767408 | 9289761 | 1767310 | 9289685 | 100 | L5-11 | 1764808 | 9289549 | 1765409 | 9289848 | 18 | 100 | L5-31 | 1765375 | 9289861 | 1765713 | 9289696 | 03 | 100 | L5-51 | 1767408 | 9289761 | 1767310 | 9289685 | 100 | L5-12 | 1765210 | 9289591 | 1765703 | 9289581 | 19 | 100 | L5-32 | 1765375 | 9289865 | 1765599 | 9289694 | 89 | 100 | L5-52 | 1767408 | 9289761 | 1767310 | 9289685 | 100 | L5-13 | 1764808 | 9289562 | 1765387 | 9289604 | 04 | 100 | L5-33 | 1765366 | 9289875 | 1765959 | 9289698 | 50 | 100 | L5-53 | 1767408 | 9289761 | 1767310 | 9289685 | 100 | L5-14 | 1764808 | 9289561 | 1765388 | 9289617 | 75 | 100 | L5-34 | 1765375 | 9289881 | 1766027 | 9289769 | 65 | 100 | L5-54 | 1767408 | 9289761 | 1767310 | 9289685 | 100 | L5-15 | 1764808 | 9289563 | 1765392 | 9289629 | 61 | 100 | L5-35 | 1765375 | 9289895 | 1765389 | 9289697 | 13 | 100 | L5-55 | 1767408 | 9289761 | 1767310 | 9289685 | 100 | L5-16 | 1764902 | 9289563 | 1765415 | 9289648 | 03 | 100 | L5-36 | 1765375 | 9289852 | 1765464 | 9289545 | 100 | L5-56 | 1767408 | 9289761 | 1767310 | 9289685 | 100 | L5-17 | 1764902 | 9289569 | 1765467 | 9289662 | 10 | 100 | L5-37 | 1765375 | 9289845 | 1765384 | 9289541 | 04 | 100 | L5-57 | 1767408 | 9289761 | 1767310 | 9289685 | 100 | L5-18 | 1764905 | 9289565 | 1765468 | 9289672 | 23 | 100 | L5-38 | 1765375 | 9289848 | 1765240 | 9289584 | 74 | 100 | L5-58 | 1767408 | 9289761 | 1767310 | 9289685 | 100 | L5-19 | 1764907 | 9289570 | 1765466 | 9289671 | 33 | 100 | L5-39 | 1765375 | 9289850 | 1765281 | 9289587 | 40 | 100 | L5-59 | 1767408 | 9289761 | 1767310 | 9289685 | 100 | L5-20 | 1765120 | 9289705 | 1765400 | 9289751 | 49 | 100 | L5-60 | 1765120 | 9289705 | 1765400 | 9289751 | 49 | 100 | L5-60 | 1765120 | 9289705 | 1765400 | 9289751 | 49 | 100 | L5-60 | 1765120 | 9289705 | 1765400 | 9289751 | 49 | 100 | L5-60 | 1765120 | 9289705 | 1765400 | 9289751 | 49 | 100 | L5-60 | 1765120 | 9289705 | 1765400 | 9289751 | 49 | 100 | L5-60 | 1765120 | 9289705 | 1765400 | 9289751 | 49 | 100 | L5-60 | 1765120 | 9289705 | 1765400 | 9289751 | 49 | 100 | L5-60 | 1765120 | 9289705 | 1765400 | 9289751 | 49 | 100 | L5-60 | 1765120 | 9289705 | 1765400 | 9289751 | 49 | 100 | L5-60 | 1765120 | 9289705 | 1765400 | 9289751 | 49 | 100 | L5-60 | 1765120 | 9289705 | 1765400 | 9289751 | 49 | 100 | L5-60 | 1765120 | 9289705 | 1765400 | 9289751 | 49 | 100 | L5-60 | 1765120 | 9289705 | 1765400 | 9289751 | 49 | 100 | L5-60 | 1765120 | 9289705 | 1765400 | 9289751 | 49 | 100 | L5-60 | 1765120 | 9289705 | 1765400 | 9289751 | 49 | 100 | L5-60 | 1765120 | 9289705 | 1765400 | 9289751 | 49 | 100 | L5-60 | 1765120 | 9289705 | 1765400 | 9289751 | 49 | 100 | L5-60 | 1765120 | 9289705 | 1765400 | 9289751 | 49 | 100 | L5-60 | 1765120 | 9289705 | 1765400 | 9289751 | 49 | 100 | L5-60 | 1765120 | 9289705 | 1765400 | 9289751 | 49 | 100 | L5-60 | 1765120 | 9289705 | 1765400 | 9289751 | 49 | 100 | L5-60 | 1765120 | 9289705 | 1765400 | 9289751 | 49 | 100 | L5-60 | 1765120 | 9289705 | 1765400 | 9289751 | 49 | 100 | L5-60 | 1765120 | 9289705 | 1765400 | 9289751 | 49 | 100 | L5-60 | 1765120 | 9289705 | 1765400 | 9289751 | 49 | 100 | L5-60 | 1765120 | 9289705 | 1765400 | 9289751 | 49 | 100 | L5-60 | 1765120 | 9289705 | 1765400 | 9289751 | 49 | 100 | L5-60 | 1765120 | 9289705 | 1765400 | 9289751 | 49 | 100 | L5-60 | 1765120 | 9289705 | 1765400 | 9289751 | 49 | 100 | L5-60 | 1765120 | 9289705 | 1765400 | 9289751 | 49 | 100 | L5-60 | 1765120 | 9289705 | 1765400 | 9289751 | 49 | 100 | L5-60 | 1765120 | 9289705 | 1765400 | 9289751 | 49 | 100 | L5-60 | 1765120 | 9289705 | 1765400 | 9289751 | 49 | 100 | L5-60 | 1765120 | 9289705 | 1765400 | 9289751 | 49 | 100 | L5-60 | 1765120 | 9289705 | 1765400 | 9289751 | 49 | 100 | L5-60 | 1765120 | 9289705 | 1765400 | 9289751 | 49 | 100 | L5-60 | 1765120 | 9289705 | 1765400 | 9289751 | 49 | 100 | L5-60 | 1765120 | 9289705 | 1765400 | 9289751 | 49 | 100 | L5-60 | 1765120 | 9289705 | 1765400 | 9289751 | 49 | 100 | L5-60 | 1765120 | 9289705 | 1765400 | 9289751 | 49 | 100 | L5-60 | 1765120 | 9289705 | 1765400 | 9289751 | 49 | 100 | L5-60 | 1765120 | 9289705 | 1765400 | 9289751 | 49 | 100 | L5-60 | 1765120 | 9289705 | 1765400 | 9289751 | 49 | 100 | L5-60 | 1765120 | 9289705 | 1765400 | 9289751 | 49 | 100 | L5-60 | 1765120 | 9289705 | 1765400 | 9289751 | 49 | 100 | L5-60 | 1765120 | 9289705 | 1765400 | 9289751 | 49 | 100 | L5-60 | 1765120 | 9289705 | 1765400 | 9289751 | 49 | 100 | L5-60 | 1765120 | 9289705 | 1765400 | 9289751 | 49 | 100 | L5-60 | 1765120 | 9289705 | 1765400 | 9289751 | 49 | 100 | L5-60 | 1765120 | 9289705 | 1765400 | 9289751 | 49 | 100 | L5-60 | 1765120 | 9289705 | 1765400 | 9289751 | 49 | 100 | L5-60 | 1765120 | 9289705 | 1765400 | 9289751 | 49 | 100 | L5-60 | 1765120 | 9289705 | 1765400 | 9289751 | 49 | 100 | L5-60 | 1765120 | 9289705 | 1765400 | 9289751 | 49 | 100 | L5-60 | 1765120 | 9289705 | 1765400 | 9289751 | 49 | 100 | L5-60 | 1765120 | 9289705 | 1765400 | 9289751 | 49 | 100 | L5-60 | 1765120 | 9289705 | 1765400 | 928 |

CONFIDENTIAL -

1. LA INFORMACION TOPOGRAFICA ESTA EN EL SISTEMA UTM WGS84, ZONA 18 SUR.
2. LA UNIDAD PARA LAS DIMENSIONES ES EN METROS Y LAS ELEVACIONES EN M.S.N.M., SIENDO SE INDICARÁ LO CONTRARIO.
3. LOS ESQUELOS MOSTRADOS EN EL PLAN TOPOGRÁFICO, ATENDIENDO A:

DOCUMENTOS DE REFERENCIA

| REV. | DESCRIPCIÓN |
|------|-------------|
| A    |             |
|      |             |
|      |             |
|      |             |

NOTAS:

ESTE PLANO Y LA INFORMACION  
CONTENIDA SON PROPIEDAD DEL  
CLIENTE, SU USO SIN PREVIA  
AUTORIZACION ESTA PROHIBIDA.  
CUALQUIER MODIFICACION DE LOS  
DATOS CONTENIDOS EN ESTE  
PLANO SERA RESPONSABILIDAD  
EXCLUSIVA DEL USUARIO SIN  
NINGUNA RESPONSABILIDAD LEGAL  
POR PARTE DEL CLIENTE.

**NOTE:**

**CONSULTOR:**  
Ing. Nilsson Mori Sánchez

PROYECTO:

CONTRATACIÓN DE SERVICIO PARA LA DETERMINACIÓN DE LA ESTRATIGRAFÍA DEL ÁREA  
NUCLEAR DE LA ZONA ARQUEOLÓGICA MONUMENTAL DE KUÉLAP  
NÚMERO DE CONTRATO: N° 030-2023-OGA-SG/MC

TITULO: PLANO DE PERFILES SISMICOS

|         |         |           |       |      |   |
|---------|---------|-----------|-------|------|---|
| ESCALA: | GRAFICA | PLANO N°: | LS-35 | REV. | A |
|---------|---------|-----------|-------|------|---|



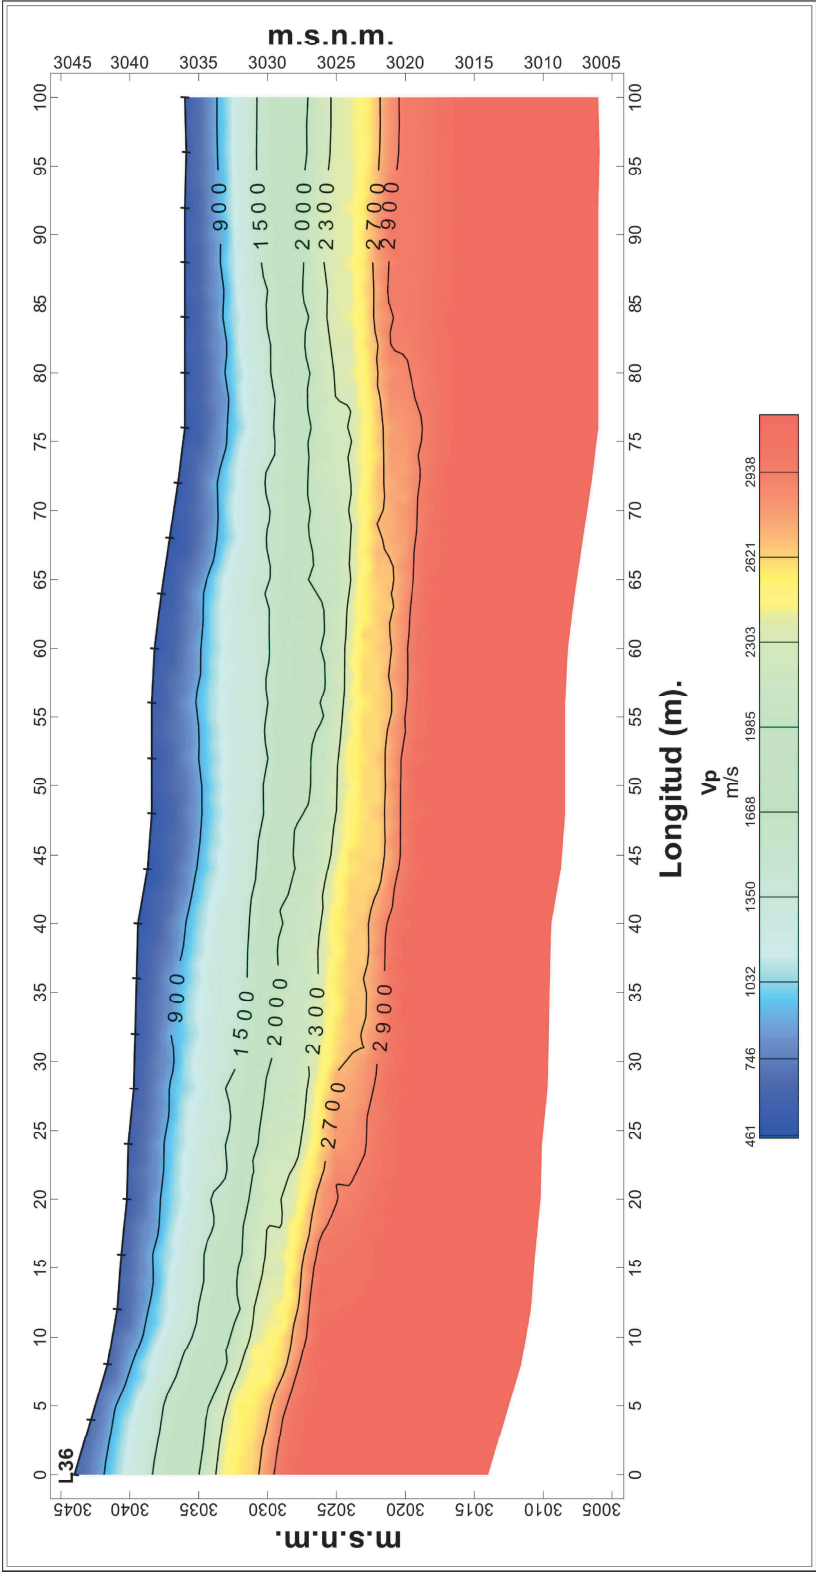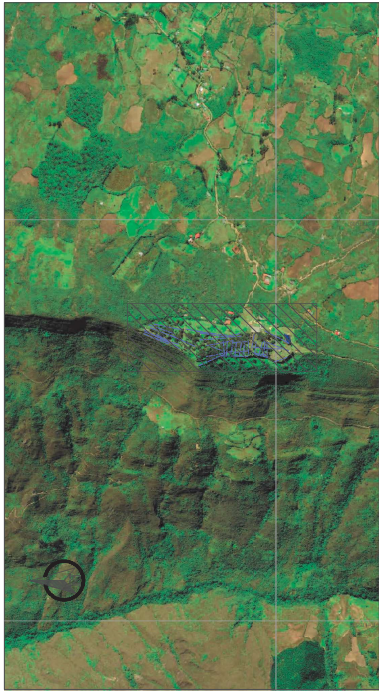

PLANO DE LOCALIZACIÓN DEL PROYECTO  
ESCALA 1/10000

| CUADRO DE COORDENADAS |           |            |           |            |          |        |           |            |           |            |          |        |           |            |           |            |     |
|-----------------------|-----------|------------|-----------|------------|----------|--------|-----------|------------|-----------|------------|----------|--------|-----------|------------|-----------|------------|-----|
| Código                | Inicio    |            | Fin       | Código     | Longitud | Inicio |           | Fin        |           | Código     | Longitud | Inicio |           | Fin        |           | Longitud   |     |
|                       | Este      | Norte      |           |            |          | Este   | Norte     | Este       | Norte     |            |          | Este   | Norte     |            |           |            |     |
| LS-01                 | 176486.00 | 9289459.00 | 176469.25 | 9289506.11 | 50       | LS-21  | 176546.00 | 9289661.00 | 176529.83 | 9289759.34 | 100      | LS-41  | 176468.00 | 9289761.00 | 176514.00 | 9289851.00 | 100 |
| LS-02                 | 176486.00 | 9289532.00 | 176497.63 | 9289590.63 | 50       | LS-22  | 176558.00 | 9289685.00 | 176576.43 | 9289783.95 | 100      | LS-42  | 176505.00 | 9289752.00 | 176518.00 | 9289847.00 | 100 |
| LS-03                 | 176490.00 | 9289506.00 | 176491.08 | 9289705.99 | 100      | LS-23  | 176562.00 | 9289685.00 | 176551.15 | 9289784.77 | 100      | LS-43  | 176518.00 | 9289756.00 | 176527.00 | 9289847.00 | 100 |
| LS-04                 | 176496.00 | 9289596.00 | 176455.48 | 9289787.42 | 100      | LS-24  | 176568.00 | 9289686.00 | 176581.56 | 9289783.08 | 100      | LS-44  | 176504.00 | 9289749.00 | 176529.00 | 9289835.00 | 100 |
| LS-05                 | 176488.00 | 9289760.00 | 176508.23 | 9289662.07 | 100      | LS-25  | 176575.00 | 9289635.00 | 176564.60 | 9289683.91 | 50       | LS-45  | 176516.00 | 9289754.00 | 176513.00 | 9289848.00 | 100 |
| LS-06                 | 176504.00 | 9289556.00 | 176510.20 | 9289606.39 | 50       | LS-26  | 176565.00 | 9289630.00 | 176562.01 | 9289679.91 | 50       | LS-46  | 176552.00 | 9289829.00 | 176504.00 | 9289955.00 | 100 |
| LS-07                 | 176502.00 | 9289587.00 | 176495.24 | 9289537.46 | 50       | LS-27  | 176546.00 | 9289611.00 | 176541.44 | 9289660.87 | 50       | LS-47  | 176586.00 | 9289869.00 | 176599.00 | 9289967.00 | 100 |
| LS-08                 | 176486.00 | 9289531.00 | 176535.99 | 9289534.02 | 50       | LS-28  | 176536.00 | 9289502.00 | 176572.96 | 9289949.92 | 100      | LS-48  | 176567.00 | 9289797.00 | 176577.00 | 9289862.00 | 100 |
| LS-09                 | 176491.00 | 9289547.00 | 176540.68 | 9289541.36 | 50       | LS-29  | 176542.00 | 9289503.00 | 176587.25 | 9289921.18 | 100      | LS-49  | 176550.00 | 9289769.00 | 176579.00 | 9289868.00 | 100 |
| LS-10                 | 176494.00 | 9289565.00 | 176541.74 | 9289550.15 | 50       | LS-30  | 176546.00 | 9289597.00 | 176580.89 | 9289991.44 | 100      | LS-50  | 176534.00 | 9289765.00 | 176575.00 | 9289862.00 | 100 |
| LS-11                 | 176495.00 | 9289580.00 | 176544.69 | 9289574.48 | 50       | LS-31  | 176555.00 | 9289861.00 | 176571.53 | 9289946.09 | 100      | LS-51  | 176531.00 | 9289756.00 | 176565.00 | 9289845.00 | 100 |
| LS-12                 | 176521.00 | 9289591.00 | 176570.03 | 9289581.19 | 50       | LS-32  | 176555.00 | 9289865.00 | 176559.99 | 9289961.83 | 100      | LS-52  | 176533.00 | 9289760.00 | 176593.00 | 9289830.00 | 100 |
| LS-13                 | 176498.00 | 9289502.00 | 176547.96 | 9289604.04 | 50       | LS-33  | 176566.00 | 9289875.00 | 176595.47 | 9289968.50 | 100      | LS-53  | 176585.00 | 9289597.00 | 176542.00 | 9289858.00 | 100 |
| LS-14                 | 176498.00 | 9289521.00 | 176538.89 | 9289617.75 | 50       | LS-34  | 176575.00 | 9289881.00 | 176607.27 | 9289975.65 | 100      | LS-54  | 176519.00 | 9289586.00 | 176532.00 | 9289863.00 | 100 |
| LS-15                 | 176490.00 | 9289538.00 | 176539.29 | 9289629.61 | 50       | LS-35  | 176610.00 | 9289855.00 | 176589.96 | 9289857.03 | 100      | LS-55  | 176483.00 | 9289519.00 | 176536.00 | 9289590.00 | 100 |
| LS-16                 | 176492.00 | 9289553.00 | 176541.75 | 9289648.03 | 50       | LS-36  | 176510.00 | 9289452.00 | 176546.40 | 9289545.14 | 100      | LS-56  | 176564.00 | 9289512.00 | 176502.00 | 9289584.00 | 100 |
| LS-17                 | 176497.00 | 9289569.00 | 176546.37 | 9289661.10 | 50       | LS-37  | 176536.00 | 9289452.00 | 176584.51 | 9289544.04 | 100      | LS-57  | 176564.00 | 9289640.00 | 176501.00 | 9289559.00 | 100 |
| LS-18                 | 176495.00 | 9289585.00 | 176544.92 | 9289622.33 | 50       | LS-38  | 176557.00 | 9289485.00 | 176524.20 | 9289584.74 | 100      | LS-58  | 176493.00 | 9289472.00 | 176506.00 | 9289572.00 | 100 |
| LS-19                 | 176497.00 | 9289593.00 | 176546.81 | 9289627.33 | 50       | LS-39  | 176527.00 | 9289503.00 | 176568.16 | 9289584.14 | 100      | LS-59  | 176548.00 | 9289457.00 | 176495.00 | 9289572.00 | 100 |
| LS-20                 | 176512.00 | 9289705.00 | 176530.40 | 9289751.49 | 50       | LS-40  | 176577.00 | 9289738.00 | 176591.62 | 9289836.25 | 100      | LS-60  | 176531.00 | 9289490.00 | 176545.00 | 9289594.00 | 100 |

| CONFIDENCIAL                                                                                                                                                                                                                                                       |             | DOCUMENTOS DE REFERENCIA                                                                                                                                                                                |          | REVISIONES            |             | CLIENTE                    |          | PROYECTO              |          |
|--------------------------------------------------------------------------------------------------------------------------------------------------------------------------------------------------------------------------------------------------------------------|-------------|---------------------------------------------------------------------------------------------------------------------------------------------------------------------------------------------------------|----------|-----------------------|-------------|----------------------------|----------|-----------------------|----------|
| REV.                                                                                                                                                                                                                                                               | DESCRIPCIÓN | REV.                                                                                                                                                                                                    | FECHA    | EMITIDO PARA REVISIÓN | DESCRIPCIÓN | DEBILLO                    | PREPARO  | APROBÓ                | AUTORIZÓ |
| A                                                                                                                                                                                                                                                                  |             |                                                                                                                                                                                                         | 04.07.23 |                       |             | S-BLANCO                   | S-BLANCO | N. MORI               | N. MORI  |
|                                                                                                                                                                                                                                                                    |             |                                                                                                                                                                                                         |          |                       |             |                            |          |                       |          |
|                                                                                                                                                                                                                                                                    |             |                                                                                                                                                                                                         |          |                       |             |                            |          |                       |          |
|                                                                                                                                                                                                                                                                    |             |                                                                                                                                                                                                         |          |                       |             |                            |          |                       |          |
| NOTAS:                                                                                                                                                                                                                                                             |             | 1. LA INFORMACIÓN TOPOGRÁFICA ESTÁ EN EL SISTEMA UTM NOROCCIDENTAL, ZONA 18 SUR.                                                                                                                        |          | CONSULTOR:            |             | Ing. Nilsson Mori Sánchez  |          | CIP 175217            |          |
| ESTE PLANO Y LA INFORMACIÓN CONTENIDA SON PROPIEDAD DEL CLIENTE. SU USO SIN PERMISO DEL INGENIERO RESPONSABLE, O CUALQUIER MODIFICACIÓN DE LOS DATOS CONTENIDOS EN ESTE PLANO, SERÁ LA RESPONSABILIDAD DEL CLIENTE. NINGUNA RESPONSABILIDAD POR PARTE DEL CLIENTE. |             | 2. EL PLANO DE LOCALIZACIÓN DEL PROYECTO ES UNA REPRESENTACIÓN GENERAL DEL TERRENO, SIN GARANTÍAS DE PRECISIÓN. EL CLIENTE DEBE VERIFICAR LAS COORDENADAS EN LAS IMAGENES DE SATÉLITE PARA EL CONTRATO. |          | TÍTULO:               |             | PLANO DE PERFILES SÍSMICOS |          | ESTUDIOS DE GEOFÍSICA |          |
|                                                                                                                                                                                                                                                                    |             | 3. LAS ESCALAS MOSTRADAS EN ESTE PLANO SON PARA EL CONTRATO.                                                                                                                                            |          | ESCALA:               |             | GRÁFICA                    |          | PLANO Nº:             |          |
|                                                                                                                                                                                                                                                                    |             |                                                                                                                                                                                                         |          | REVISIONES PREVIAS    |             |                            |          | LS-36                 |          |
|                                                                                                                                                                                                                                                                    |             |                                                                                                                                                                                                         |          |                       |             |                            |          | REV.                  |          |
|                                                                                                                                                                                                                                                                    |             |                                                                                                                                                                                                         |          |                       |             |                            |          | A                     |          |

CONTRATACIÓN DE SERVICIO PARA LA DETERMINACIÓN DE LA ESTRATIGRAFÍA DE ÁREA NUCLEAR DE LA ZONA ARQUEOLÓGICA MONUMENTAL DE KUÉLAP  
NÚMERO DE CONTRATO: Nº 030-2023-OGA-SG/MC







REFERENCES

[illegible]





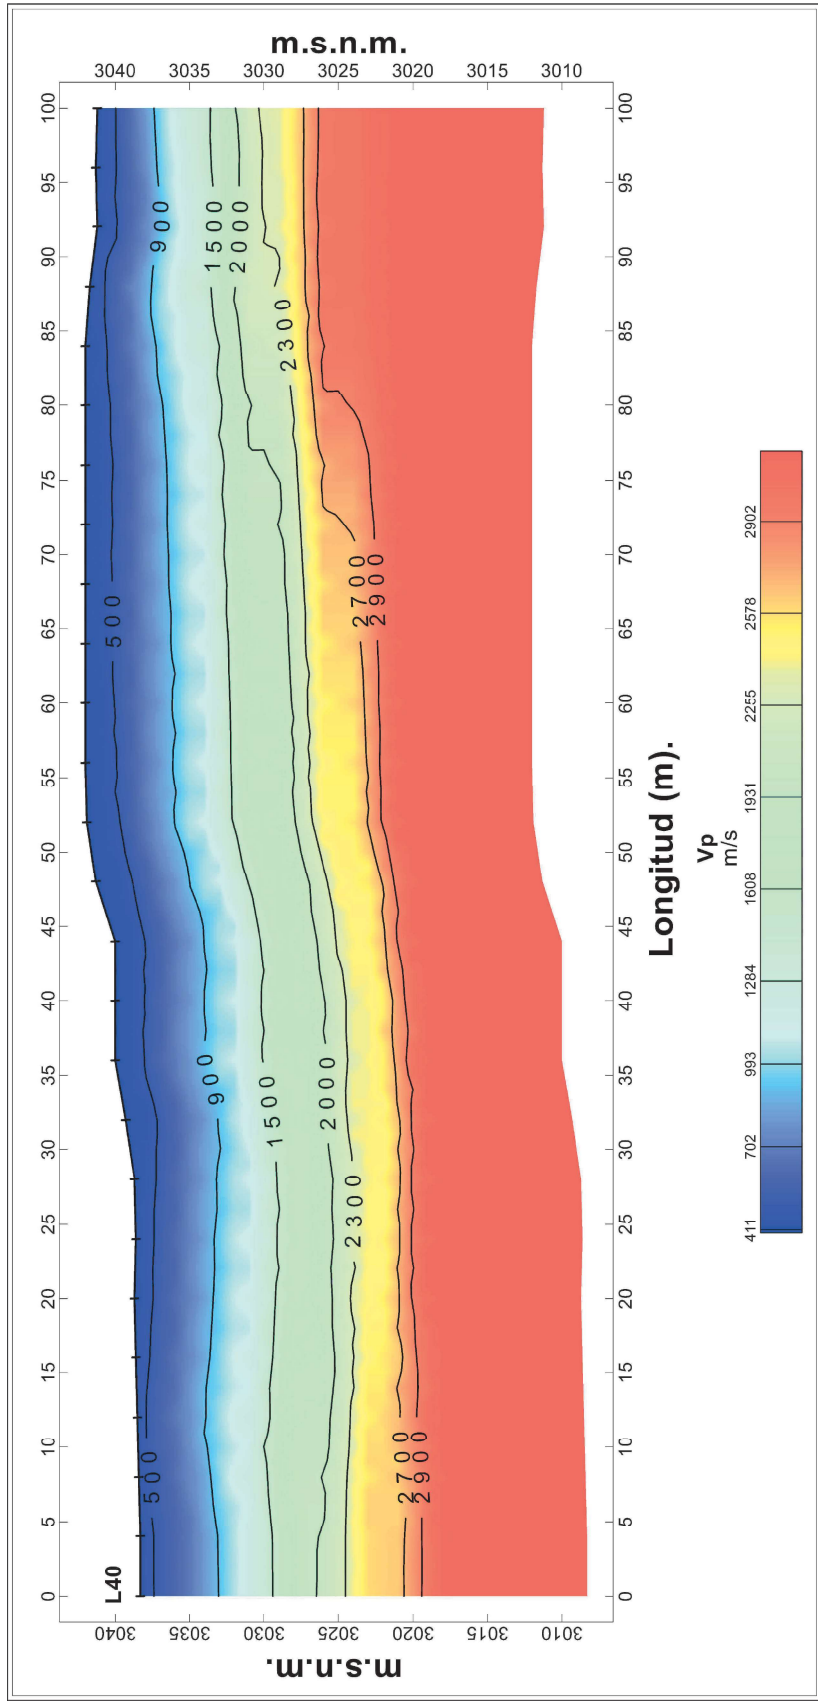

PLANO DE LOCALIZACIÓN DEL PROYECTO

| Código | CUADRO DE COORDENADAS |         |         |            |      |       |         |         |         |            | Longitud | Código | Inicio  |         |         |            | Fin  |       |         |         | Longitud | Código     | Inicio |        |         |         | Fin     |            |     |  | Longitud |
|--------|-----------------------|---------|---------|------------|------|-------|---------|---------|---------|------------|----------|--------|---------|---------|---------|------------|------|-------|---------|---------|----------|------------|--------|--------|---------|---------|---------|------------|-----|--|----------|
|        | Este                  | Norte   | Este    | Norte      | Este | Norte | Este    | Norte   | Este    | Norte      |          |        | Este    | Norte   | Este    | Norte      | Este | Norte | Este    | Norte   |          |            | Este   | Norte  | Este    | Norte   |         |            |     |  |          |
| LS-01  | 1764800               | 9289540 | 1764693 | 9289506.11 | 50   | LS-21 | 1765348 | 9289861 | 1765293 | 9289793.34 | 100      | LS-41  | 1767408 | 9289761 | 1767310 | 9289681.00 | 100  | LS-61 | 1769468 | 9289661 | 1769370  | 9289581.00 | 100    | LS-81  | 1771528 | 9289561 | 1771430 | 9289481.00 | 100 |  |          |
| LS-02  | 1764800               | 9289532 | 1764697 | 9289500.63 | 50   | LS-22 | 1765358 | 9289865 | 1765297 | 9289793.95 | 100      | LS-42  | 1767408 | 9289752 | 1767310 | 9289672.00 | 100  | LS-62 | 1769468 | 9289648 | 1769370  | 9289564.00 | 100    | LS-82  | 1771528 | 9289548 | 1771430 | 9289468.00 | 100 |  |          |
| LS-03  | 1764900               | 9289906 | 1764901 | 9289877.42 | 100  | LS-23 | 1765662 | 9289865 | 1765611 | 9289784.77 | 100      | LS-43  | 1767618 | 9289756 | 1767520 | 9289672.00 | 100  | LS-63 | 1769678 | 9289640 | 1769580  | 9289556.00 | 100    | LS-83  | 1771738 | 9289528 | 1771640 | 9289448.00 | 100 |  |          |
| LS-04  | 1764900               | 9289906 | 1764905 | 9289787.42 | 100  | LS-24 | 1765662 | 9289866 | 1765611 | 9289785.00 | 100      | LS-44  | 1767618 | 9289740 | 1767520 | 9289658.00 | 100  | LS-64 | 1769678 | 9289640 | 1769580  | 9289556.00 | 100    | LS-84  | 1771738 | 9289528 | 1771640 | 9289448.00 | 100 |  |          |
| LS-05  | 1764800               | 9289760 | 1765083 | 9289666.37 | 100  | LS-25 | 1765755 | 9289863 | 1765602 | 9289683.91 | 50       | LS-45  | 1767616 | 9289754 | 1767520 | 9289658.00 | 100  | LS-65 | 1769676 | 9289638 | 1769580  | 9289554.00 | 100    | LS-85  | 1771736 | 9289526 | 1771640 | 9289446.00 | 100 |  |          |
| LS-06  | 1765000               | 9289856 | 1765120 | 9289866.09 | 50   | LS-26 | 1765655 | 9289830 | 1765601 | 9289759.51 | 50       | LS-46  | 1767652 | 9289750 | 1767504 | 9289652.00 | 100  | LS-66 | 1769712 | 9289670 | 1769624  | 9289584.00 | 100    | LS-86  | 1771792 | 9289532 | 1771644 | 9289452.00 | 100 |  |          |
| LS-07  | 1765000               | 9289857 | 1764905 | 9289537.46 | 50   | LS-27 | 1765445 | 9289811 | 1765441 | 9289660.87 | 100      | LS-47  | 1767656 | 9289751 | 1767504 | 9289659.00 | 100  | LS-67 | 1769712 | 9289670 | 1769624  | 9289584.00 | 100    | LS-87  | 1771792 | 9289532 | 1771644 | 9289452.00 | 100 |  |          |
| LS-08  | 1764800               | 9289533 | 1765399 | 9289534.06 | 50   | LS-28 | 1765336 | 9289802 | 1765272 | 9289994.92 | 100      | LS-48  | 1767657 | 9289750 | 1767504 | 9289659.00 | 100  | LS-68 | 1769712 | 9289670 | 1769624  | 9289584.00 | 100    | LS-88  | 1771792 | 9289532 | 1771644 | 9289452.00 | 100 |  |          |
| LS-09  | 1764900               | 9289547 | 1765406 | 9289541.36 | 50   | LS-29 | 1765442 | 9289803 | 1765387 | 9289992.14 | 100      | LS-49  | 1767650 | 9289749 | 1767507 | 9289658.00 | 100  | LS-69 | 1769712 | 9289670 | 1769624  | 9289584.00 | 100    | LS-89  | 1771792 | 9289532 | 1771644 | 9289452.00 | 100 |  |          |
| LS-10  | 1764900               | 9289545 | 1765414 | 9289550.11 | 50   | LS-30 | 1765448 | 9289807 | 1765389 | 9289991.44 | 100      | LS-50  | 1767654 | 9289750 | 1767507 | 9289659.00 | 100  | LS-70 | 1769716 | 9289674 | 1769628  | 9289588.00 | 100    | LS-90  | 1771796 | 9289536 | 1771648 | 9289456.00 | 100 |  |          |
| LS-11  | 1764900               | 9289540 | 1765407 | 9289544.58 | 50   | LS-31 | 1765515 | 9289861 | 1765713 | 9289946.09 | 100      | LS-51  | 1767631 | 9289746 | 1767505 | 9289645.00 | 100  | LS-71 | 1769700 | 9289669 | 1769623  | 9289583.00 | 100    | LS-91  | 1771780 | 9289531 | 1771643 | 9289451.00 | 100 |  |          |
| LS-12  | 1765210               | 9289590 | 1765703 | 9289583.19 | 50   | LS-32 | 1765535 | 9289865 | 1765599 | 9289964.83 | 100      | LS-52  | 1767633 | 9289760 | 1767512 | 9289630.00 | 100  | LS-72 | 1769702 | 9289671 | 1769625  | 9289585.00 | 100    | LS-92  | 1771782 | 9289533 | 1771645 | 9289453.00 | 100 |  |          |
| LS-13  | 1764900               | 9289602 | 1765787 | 9289604.04 | 100  | LS-33 | 1765606 | 9289875 | 1765959 | 9289968.50 | 100      | LS-53  | 1767685 | 9289907 | 1767542 | 9289638.00 | 100  | LS-73 | 1769704 | 9289673 | 1769627  | 9289586.00 | 100    | LS-93  | 1771784 | 9289535 | 1771647 | 9289455.00 | 100 |  |          |
| LS-14  | 1764800               | 9289621 | 1765388 | 9289617.75 | 50   | LS-34 | 1765755 | 9289881 | 1766027 | 9289976.65 | 100      | LS-54  | 1767685 | 9289886 | 1767542 | 9289638.00 | 100  | LS-74 | 1769704 | 9289673 | 1769627  | 9289586.00 | 100    | LS-94  | 1771784 | 9289535 | 1771647 | 9289455.00 | 100 |  |          |
| LS-15  | 1764900               | 9289638 | 1765399 | 9289629.61 | 50   | LS-35 | 1765710 | 9289895 | 1765889 | 9289877.03 | 100      | LS-55  | 1767683 | 9289891 | 1767536 | 9289590.00 | 100  | LS-75 | 1769704 | 9289673 | 1769627  | 9289586.00 | 100    | LS-95  | 1771784 | 9289535 | 1771647 | 9289455.00 | 100 |  |          |
| LS-16  | 1764900               | 9289638 | 1765399 | 9289629.61 | 50   | LS-36 | 1765710 | 9289842 | 1765646 | 9289545.14 | 100      | LS-56  | 1767684 | 9289892 | 1767537 | 9289591.00 | 100  | LS-76 | 1769704 | 9289673 | 1769627  | 9289586.00 | 100    | LS-96  | 1771784 | 9289535 | 1771647 | 9289455.00 | 100 |  |          |
| LS-17  | 1764900               | 9289669 | 1765463 | 9289661.10 | 50   | LS-37 | 1765738 | 9289845 | 1765841 | 9289584.04 | 100      | LS-57  | 1767684 | 9289894 | 1767537 | 9289591.00 | 100  | LS-77 | 1769704 | 9289673 | 1769627  | 9289586.00 | 100    | LS-97  | 1771784 | 9289535 | 1771647 | 9289455.00 | 100 |  |          |
| LS-18  | 1764900               | 9289695 | 1765492 | 9289692.23 | 50   | LS-38 | 1765717 | 9289848 | 1765824 | 9289584.74 | 100      | LS-58  | 1767693 | 9289897 | 1767540 | 9289592.00 | 100  | LS-78 | 1769704 | 9289673 | 1769627  | 9289586.00 | 100    | LS-98  | 1771784 | 9289535 | 1771647 | 9289455.00 | 100 |  |          |
| LS-19  | 1765100               | 9289703 | 1765466 | 9289697.33 | 50   | LS-39 | 1765727 | 9289850 | 1765868 | 9289586.25 | 100      | LS-59  | 1767693 | 9289898 | 1767540 | 9289592.00 | 100  | LS-79 | 1769704 | 9289673 | 1769627  | 9289586.00 | 100    | LS-99  | 1771784 | 9289535 | 1771647 | 9289455.00 | 100 |  |          |
| LS-20  | 1765100               | 9289705 | 1765400 | 9289751.49 | 100  | LS-40 | 1765734 | 9289853 | 1765875 | 9289986.15 | 100      | LS-60  | 1767693 | 9289899 | 1767540 | 9289592.00 | 100  | LS-80 | 1769704 | 9289673 | 1769627  | 9289586.00 | 100    | LS-100 | 1771784 | 9289535 | 1771647 | 9289455.00 | 100 |  |          |

|                                                                                                                                                                                                                     |                                                                                                                                                                                                                   |                          |             |      |          |                       |            |           |          |            |  |                                                                                                                                                                               |                                                                                                                                                                                                                          |                                                          |                                       |                                  |              |
|---------------------------------------------------------------------------------------------------------------------------------------------------------------------------------------------------------------------|-------------------------------------------------------------------------------------------------------------------------------------------------------------------------------------------------------------------|--------------------------|-------------|------|----------|-----------------------|------------|-----------|----------|------------|--|-------------------------------------------------------------------------------------------------------------------------------------------------------------------------------|--------------------------------------------------------------------------------------------------------------------------------------------------------------------------------------------------------------------------|----------------------------------------------------------|---------------------------------------|----------------------------------|--------------|
| <div>CONFIDENCIAL</div> <div>ESTE PLANO Y LA INFORMACION QUE CONTIENE SON PROPIEDAD DE SU CLIENTE. AUTORIZACION PARA REPRODUCIR LOS DATOS CONTENIDOS EN ESTE PLANO CON RESPONSABILIDAD POR PARTE DEL CLIENTE.</div> | <div>NOTAS:</div> <div>1. LA INFORMACION TOPOGRAFICA ESTA EN EL SISTEMA UTM.</div> <div>2. LA UNIDAD PARA LAS DIMENSIONES ES EN METROS Y M.M.</div> <div>3. LAS ESCALAS MOSTRAN LAS P.A.S. E.L. FORMATO A1.</div> | DOCUMENTOS DE REFERENCIA |             |      |          |                       | REVISIONES |           |          |            |  | <div>CLIENTE:</div> <div></div> <div>Ing. Nilsson Mori Sánchez</div> <div>CIP 175217</div> | <div>PROYECTO:</div> <div>CONTRATACIÓN DE SERVICIO PARA LA DETERMINACIÓN DE LA ESTRATIGRAFÍA DEL ÁREA NUCLEAR DE LA ZONA ARQUEOLÓGICA MONUMENTAL DE KUE'LAP</div> <div>NÚMERO DE CONTRATO: Nº 030-0223-0-06A-SG/MC</div> | <div>TÍTULO:</div> <div>PLANO DE PERFILES SISMICOS</div> | <div>ESCALA:</div> <div>GRÁFICA</div> | <div>rev.</div> <div>LS-40</div> | <div>A</div> |
|                                                                                                                                                                                                                     |                                                                                                                                                                                                                   | REV.                     | DESCRIPCIÓN | REV. | FECHA    | DESCRIPCIÓN           | DIBUJO     | PREPARADO | APROBADO | AUTORIZADO |  |                                                                                                                                                                               |                                                                                                                                                                                                                          |                                                          |                                       |                                  |              |
|                                                                                                                                                                                                                     |                                                                                                                                                                                                                   | A                        |             |      | 04/07/23 | EMITIDO PARA REVISIÓN | S-BLANCO   | S-BLANCO  | N. MORI  | N. MORI    |  |                                                                                                                                                                               |                                                                                                                                                                                                                          |                                                          |                                       |                                  |              |
|                                                                                                                                                                                                                     |                                                                                                                                                                                                                   |                          |             |      |          |                       |            |           |          |            |  |                                                                                                                                                                               |                                                                                                                                                                                                                          |                                                          |                                       |                                  |              |
|                                                                                                                                                                                                                     |                                                                                                                                                                                                                   |                          |             |      |          |                       |            |           |          |            |  |                                                                                                                                                                               |                                                                                                                                                                                                                          |                                                          |                                       |                                  |              |
|                                                                                                                                                                                                                     |                                                                                                                                                                                                                   |                          |             |      |          |                       |            |           |          |            |  |                                                                                                                                                                               |                                                                                                                                                                                                                          |                                                          |                                       |                                  |              |
|                                                                                                                                                                                                                     |                                                                                                                                                                                                                   |                          |             |      |          |                       |            |           |          |            |  |                                                                                                                                                                               |                                                                                                                                                                                                                          |                                                          |                                       |                                  |              |
| REVISIONES PREVIAS                                                                                                                                                                                                  |                                                                                                                                                                                                                   |                          |             |      |          |                       |            |           |          |            |  |                                                                                                                                                                               |                                                                                                                                                                                                                          |                                                          |                                       |                                  |              |

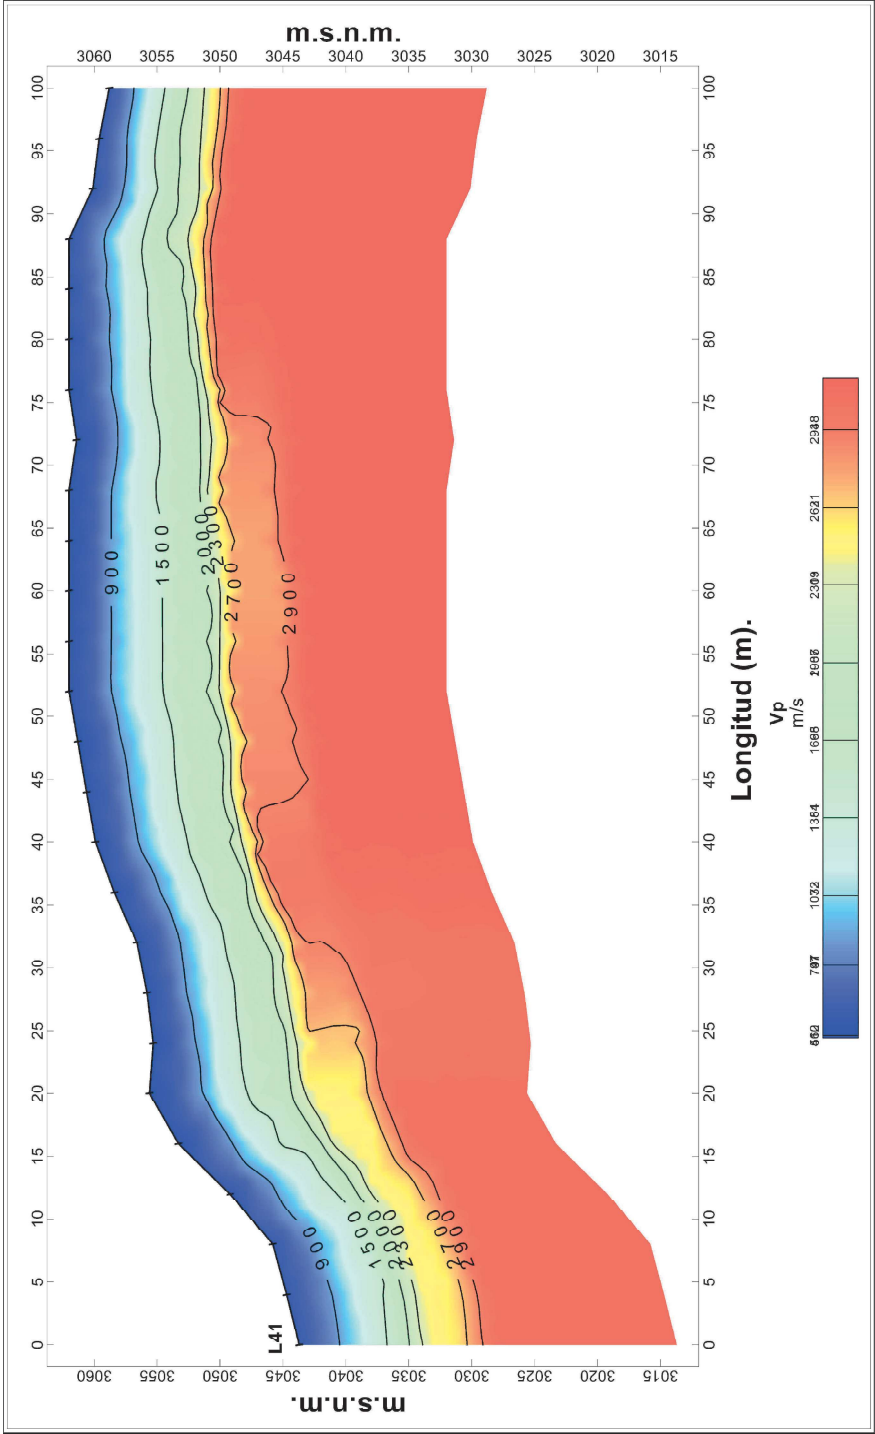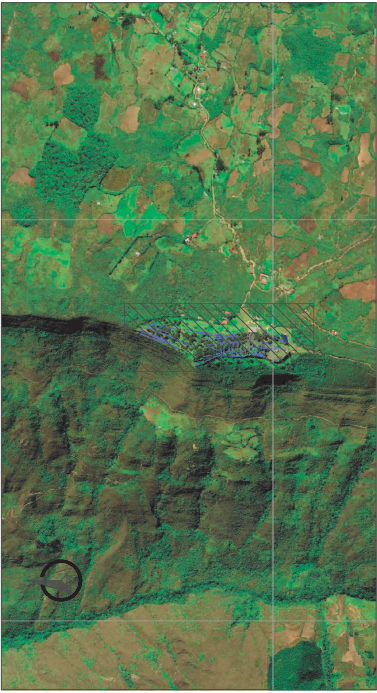

PLANO DE LOCALIZACIÓN DEL PROYECTO  
ESCALA 1/10000

| CUADRO DE COORDENADAS |           |            |           |            |        |           |            |           |            |        |           |
|-----------------------|-----------|------------|-----------|------------|--------|-----------|------------|-----------|------------|--------|-----------|
| Código                | Este      | Norte      | Este      | Norte      | Código | Este      | Norte      | Este      | Norte      | Código | Este      |
| LS-01                 | 176486.00 | 9288459.00 | 176469.25 | 9289506.11 | LS-21  | 176548.00 | 9289661.00 | 176529.83 | 9289759.34 | LS-41  | 176514.00 |
| LS-02                 | 176486.00 | 9288932.00 | 176497.63 | 9289590.63 | LS-22  | 176552.00 | 9289685.00 | 176576.43 | 9289783.95 | LS-42  | 176518.00 |
| LS-03                 | 176490.00 | 9288906.00 | 176497.08 | 9289705.99 | LS-23  | 176552.00 | 9289685.00 | 176551.15 | 9289784.77 | LS-43  | 176518.00 |
| LS-04                 | 176496.00 | 9288956.00 | 176458.48 | 9289787.42 | LS-24  | 176566.00 | 9289686.00 | 176581.56 | 9289785.08 | LS-44  | 176529.00 |
| LS-05                 | 176488.00 | 9288760.00 | 176508.23 | 9289662.07 | LS-25  | 176575.00 | 9289635.00 | 176564.60 | 9289683.91 | LS-45  | 176513.00 |
| LS-06                 | 176504.00 | 9288956.00 | 176510.20 | 9289606.39 | LS-26  | 176566.00 | 9289635.00 | 176562.01 | 9289679.91 | LS-46  | 176529.00 |
| LS-07                 | 176502.00 | 9288987.00 | 176495.24 | 928937.46  | LS-27  | 176545.00 | 9289611.00 | 176541.44 | 9289660.87 | LS-47  | 176529.00 |
| LS-08                 | 176486.00 | 9288933.00 | 176535.99 | 9289534.02 | LS-28  | 176536.00 | 9289502.00 | 176572.96 | 928994.92  | LS-48  | 176529.00 |
| LS-09                 | 176491.00 | 9288947.00 | 176540.68 | 9289541.36 | LS-29  | 176542.00 | 9289503.00 | 176587.25 | 9289921.18 | LS-49  | 176529.00 |
| LS-10                 | 176494.00 | 9288956.00 | 176541.74 | 9289550.15 | LS-30  | 176542.00 | 9289503.00 | 176587.25 | 9289921.18 | LS-50  | 176529.00 |
| LS-11                 | 176495.00 | 9288950.00 | 176544.69 | 9289574.48 | LS-31  | 176535.00 | 9289661.00 | 176571.53 | 9289946.09 | LS-51  | 176531.00 |
| LS-12                 | 176521.00 | 9288991.00 | 176570.03 | 9289581.19 | LS-32  | 176535.00 | 9289661.00 | 176559.99 | 9289961.83 | LS-52  | 176531.00 |
| LS-13                 | 176498.00 | 9288902.00 | 176547.96 | 9289604.04 | LS-33  | 176535.00 | 9289661.00 | 176559.99 | 9289961.83 | LS-53  | 176531.00 |
| LS-14                 | 176498.00 | 9288921.00 | 176538.89 | 9289617.75 | LS-34  | 176535.00 | 9289661.00 | 176559.99 | 9289961.83 | LS-54  | 176531.00 |
| LS-15                 | 176490.00 | 9288938.00 | 176539.29 | 9289629.61 | LS-35  | 176510.00 | 9289555.00 | 176589.96 | 928957.65  | LS-55  | 176519.00 |
| LS-16                 | 176492.00 | 9288953.00 | 176541.75 | 9289648.03 | LS-36  | 176510.00 | 9289452.00 | 176546.40 | 9289545.14 | LS-56  | 176519.00 |
| LS-17                 | 176497.00 | 9288969.00 | 176546.37 | 9289661.10 | LS-37  | 176535.00 | 9289452.00 | 176584.51 | 9289544.04 | LS-57  | 176519.00 |
| LS-18                 | 176495.00 | 9288985.00 | 176544.92 | 9289682.33 | LS-38  | 176517.00 | 9289485.00 | 176524.20 | 9289584.74 | LS-58  | 176519.00 |
| LS-19                 | 176497.00 | 9288993.00 | 176546.81 | 9289697.33 | LS-39  | 176517.00 | 9289485.00 | 176524.20 | 9289584.74 | LS-59  | 176519.00 |
| LS-20                 | 176512.00 | 9289705.00 | 176530.40 | 9289751.49 | LS-40  | 176517.00 | 9289738.00 | 176591.62 | 9289836.25 | LS-60  | 176519.00 |

CONFIDENCIAL

ESTE PLANO Y LA INFORMACIÓN CONTENIDA SON PROPIEDAD DEL CLIENTE. SU USO SIN PERMISO POR ESCRITO DEL CLIENTE, O LA MODIFICACIÓN, REPRODUCCIÓN O DISTRIBUCIÓN DE ESTOS DATOS CONSTITUYE UNA INFRACCIÓN DE LA LEY Y LA RESPONSABILIDAD LEGAL POR PARTE DEL CLIENTE.

NOTAS:

1. LA INFORMACIÓN TOPOGRÁFICA ESTÁ EN EL SISTEMA UTM WGS84, ZONA 18 SUR.

2. LAS COORDENADAS EN LAS VERTICES DE LA RED DE CONTROL, EN LAS VERTICES DE LA RED DE CONTROL, EN LAS VERTICES DE LA RED DE CONTROL, EN LAS VERTICES DE LA RED DE CONTROL.

3. LAS ESCALAS MOSTRADAS EN ESTE PLANO SON LAS MUESTRADES EN EL FORMATO A1.

DOCUMENTOS DE REFERENCIA

REV.

DESCRIPCIÓN

REV. A

LA INFORMACIÓN TOPOGRÁFICA ESTÁ EN EL SISTEMA UTM WGS84, ZONA 18 SUR.

REVISIONES

REV.

FECHA

DESCRIPCIÓN

APROBADO

AUTORIZADO

REV.

FECHA

DESCRIPCIÓN

APROBADO

AUTORIZADO

CLIENTE:

PROYECTO:

CONTRATACIÓN DE SERVICIO PARA LA DETERMINACIÓN DE LA ESTRATIGRAFÍA DE ÁREA NUCLEAR DE LA ZONA ARQUEOLÓGICA MONUMENTAL DE KUÉLAP

TÍTULO:

PLANO DE PERFILES SÍSMICOS

ESCALA:

GRÁFICA

CONSULTOR:

Ing. Nilsson Mori Sánchez

PLANO Nº:

LS-41

REVISIÓN:

A

PROYECTO:

CONTRATACIÓN DE SERVICIO PARA LA DETERMINACIÓN DE LA ESTRATIGRAFÍA DE ÁREA NUCLEAR DE LA ZONA ARQUEOLÓGICA MONUMENTAL DE KUÉLAP

TÍTULO:

PLANO DE PERFILES SÍSMICOS

ESCALA:

GRÁFICA

CONSULTOR:

Ing. Nilsson Mori Sánchez

PLANO Nº:

LS-41

REVISIÓN:

A





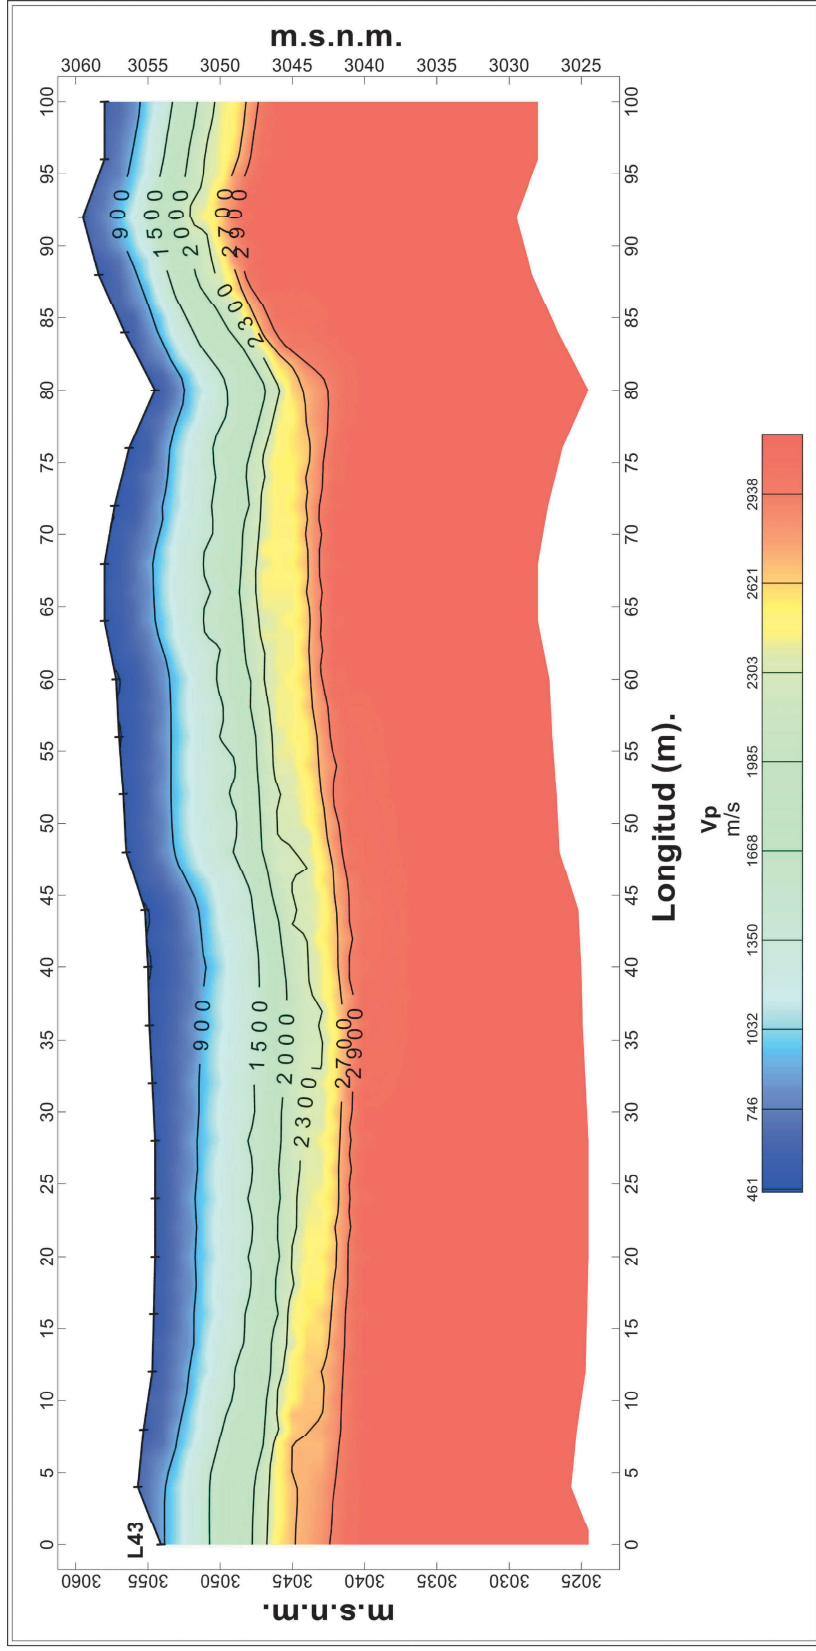

**PLANO DE LOCALIZACIÓN DEL PROYECTO**  
ESCALA: 1/10000

| Código | CUADRO DE COORDENADAS |            |           |            |        |          |         |            |            |            |        |          |         |            | Longitud | Latitud    |      |       |
|--------|-----------------------|------------|-----------|------------|--------|----------|---------|------------|------------|------------|--------|----------|---------|------------|----------|------------|------|-------|
|        | Inicio                |            | Fin       |            | Código | Longitud | Inicio  |            | Fin        |            | Código | Longitud | Inicio  |            |          |            | Fin  |       |
|        | Este                  | Norte      | Este      | Norte      |        |          | Este    | Norte      | Este       | Norte      |        |          | Este    | Norte      |          |            | Este | Norte |
| LS-01  | 1764886               | 9289459    | 1764629   | 9289506.11 | 50     | LS-21    | 1765538 | 9289861    | 1765239    | 9289739.34 | 100    | LS-41    | 1765488 | 9289761.00 | 1765348  | 9289881.00 |      |       |
| LS-02  | 1764886               | 9289532.14 | 176497.63 | 9289509.63 | 50     | LS-22    | 1765538 | 9289865    | 1765766.43 | 9289739.35 | 100    | LS-42    | 1765488 | 9289752.00 | 1765348  | 9289887.00 |      |       |
| LS-03  | 1764900               | 9289506.00 | 176491.88 | 9289709.99 | 100    | LS-23    | 1765568 | 9289886    | 176551.55  | 9289788.77 | 100    | LS-43    | 1765318 | 9289756.00 | 1765277  | 9289887.00 |      |       |
| LS-04  | 1764900               | 9289506.00 | 176491.88 | 9289787.42 | 100    | LS-24    | 1765568 | 9289886    | 176581.56  | 9289785.08 | 100    | LS-44    | 1765204 | 9289748.00 | 1765299  | 9289887.00 |      |       |
| LS-05  | 1764888               | 9289760.00 | 176508.23 | 9289662.07 | 100    | LS-25    | 1765755 | 9289855    | 1765564.60 | 9289683.91 | 50     | LS-45    | 1765166 | 9289754.00 | 1765133  | 9289888.00 |      |       |
| LS-06  | 1765044               | 9289636.00 | 1765120   | 9289606.39 | 50     | LS-26    | 1765965 | 9289830    | 176562.01  | 9289679.91 | 50     | LS-46    | 1765372 | 9288970.00 | 1765604  | 9289955.00 |      |       |
| LS-07  | 1765020               | 9289587.47 | 176495.24 | 9289537.46 | 50     | LS-27    | 1765485 | 9289811    | 176541.44  | 9289604.87 | 50     | LS-47    | 1765686 | 9289886.00 | 1765399  | 9289967.00 |      |       |
| LS-08  | 1764886               | 9289532.14 | 176535.99 | 9289534.36 | 50     | LS-28    | 1765366 | 9289802    | 1765772.96 | 9289994.92 | 100    | LS-48    | 1765657 | 9289775.00 | 1765346  | 9289870.29 |      |       |
| LS-09  | 1764901               | 9289547.00 | 176530.68 | 9289541.32 | 50     | LS-29    | 1765442 | 9289803    | 1765872.25 | 9289992.18 | 100    | LS-49    | 1765500 | 9289797.00 | 1765770  | 9289868.00 |      |       |
| LS-10  | 1764904               | 9289565.00 | 176541.74 | 9289550.48 | 50     | LS-30    | 1765448 | 9289807    | 1765801.89 | 9289991.44 | 100    | LS-50    | 1765544 | 9289769.00 | 1765779  | 9289842.00 |      |       |
| LS-11  | 1764955               | 9289530.00 | 176500.44 | 9289574.15 | 50     | LS-31    | 1765155 | 9289861    | 176571.53  | 9289964.09 | 100    | LS-51    | 1765331 | 9289756.00 | 1765655  | 9289864.00 |      |       |
| LS-12  | 1765210               | 9289591.00 | 176520.67 | 9289684.19 | 50     | LS-32    | 1765335 | 9289865    | 1765599.42 | 9289961.83 | 100    | LS-52    | 1765333 | 9289760.00 | 1765933  | 9289830.00 |      |       |
| LS-13  | 1764988               | 9289602.00 | 176547.96 | 9289604.04 | 50     | LS-33    | 1765660 | 9289875    | 176595.47  | 9289968.94 | 100    | LS-53    | 1765885 | 9289597.00 | 1765492  | 9289858.00 |      |       |
| LS-14  | 1764980               | 9289621.00 | 176538.89 | 9289617.75 | 50     | LS-34    | 1765755 | 9289881    | 176607.27  | 9289975.65 | 100    | LS-54    | 1765919 | 9289586.00 | 1765512  | 9289683.00 |      |       |
| LS-15  | 1764900               | 9289636.00 | 176539.29 | 9289629.61 | 50     | LS-35    | 1765100 | 9289855    | 176589.96  | 9289857.03 | 100    | LS-55    | 1764831 | 9289519.00 | 1765366  | 9289590.00 |      |       |
| LS-16  | 1764920               | 9289653.00 | 176541.75 | 9289648.03 | 50     | LS-36    | 1765100 | 9289857    | 176546.40  | 9289544.03 | 100    | LS-56    | 1765664 | 9289512.00 | 1765620  | 9289584.00 |      |       |
| LS-17  | 1764905               | 9289669.00 | 176546.37 | 9289661.20 | 50     | LS-37    | 1765335 | 9289845    | 176594.51  | 9289581.04 | 100    | LS-57    | 1765654 | 9289640.00 | 1765606  | 9289559.00 |      |       |
| LS-18  | 1764905               | 9289685    | 176544.92 | 9289682.63 | 50     | LS-38    | 1765177 | 9289485    | 176624.20  | 9289584.74 | 100    | LS-58    | 1764937 | 9289420.00 | 1765606  | 9289573.00 |      |       |
| LS-19  | 1764907               | 9289705    | 176546.81 | 9289697.33 | 50     | LS-39    | 1765277 | 9289803    | 176568.16  | 9289886.14 | 100    | LS-59    | 1764849 | 9289487.00 | 1764965  | 9289572.00 |      |       |
| LS-20  | 1765120               | 9289700.00 | 176530.40 | 9289751.49 | 50     | LS-40    | 1765733 | 9289738.00 | 176591.62  | 9289836.25 | 100    | LS-60    | 1765331 | 9289490.00 | 1765495  | 9289584.00 |      |       |

|                                                                                                                                                                                                                                                                                                                 |                                                                                                                                                                                                         |                          |             |          |                       |            |          |          |            |                                                                                                                                                                         |                                                                                     |  |  |  |  |  |  |  |  |  |  |  |  |  |  |  |  |  |  |  |  |  |  |  |  |  |  |  |  |  |  |  |  |  |  |  |  |  |  |  |  |  |  |  |  |  |  |  |  |  |  |  |  |  |  |  |  |  |  |  |  |  |  |  |  |  |  |  |  |  |  |  |  |  |  |  |  |  |  |  |  |  |  |  |  |  |  |  |  |  |  |  |  |  |  |  |  |  |  |  |  |  |  |  |  |  |  |  |  |  |  |  |  |  |  |  |  |  |  |  |  |  |  |  |  |  |  |  |  |  |  |  |  |  |  |  |  |  |  |  |  |  |  |  |  |  |  |  |  |  |  |  |  |  |  |  |  |  |  |  |  |  |  |  |  |  |  |  |  |  |  |  |  |  |  |  |  |  |  |  |  |  |  |  |  |  |  |  |  |  |  |  |  |  |  |  |  |  |  |  |  |  |  |  |  |  |  |  |  |  |  |  |  |  |  |  |  |  |  |  |  |  |  |  |  |  |  |  |  |  |  |  |  |  |  |  |  |  |  |  |  |  |  |  |  |  |  |  |  |  |  |  |  |  |  |  |  |  |  |  |  |  |  |  |  |  |  |  |  |  |  |  |  |  |  |  |  |  |  |  |  |  |  |  |  |  |  |  |  |  |  |  |  |  |  |  |  |  |  |  |  |  |  |  |  |  |  |  |  |  |  |  |  |  |  |  |  |  |  |  |  |  |  |  |  |  |  |  |  |  |  |  |  |  |  |  |  |  |  |  |  |  |  |  |  |  |  |  |  |  |  |  |  |  |  |  |  |  |  |  |  |  |  |  |  |  |  |  |  |  |  |  |  |  |  |  |  |  |  |  |  |  |  |  |  |  |  |  |  |  |  |  |  |  |  |  |  |  |  |  |  |  |  |  |  |  |  |  |  |  |  |  |  |  |  |  |  |  |  |  |  |  |  |  |  |  |  |  |  |  |  |  |  |  |  |  |  |  |  |  |  |  |  |  |  |  |  |  |  |  |  |  |  |  |  |  |  |  |  |  |  |  |  |  |  |  |  |  |  |  |  |  |  |  |  |  |  |  |  |  |  |  |  |  |  |  |  |  |  |  |  |  |  |  |  |  |  |  |  |  |  |  |  |  |  |  |  |  |  |  |  |  |  |  |  |  |  |  |  |  |  |  |  |  |  |  |  |  |  |  |  |  |  |  |  |  |  |  |  |  |  |  |  |  |  |  |  |  |  |  |  |  |  |  |  |  |  |  |  |  |  |  |  |  |  |  |  |  |  |  |  |  |  |  |  |  |  |  |  |  |  |  |  |  |  |  |  |  |  |  |  |  |  |  |  |  |  |  |  |  |  |  |  |  |  |  |  |  |  |  |  |  |  |  |  |  |  |  |  |  |  |  |  |  |  |  |  |  |  |  |  |  |  |  |  |  |  |  |  |  |  |  |  |  |  |  |  |  |  |  |  |  |  |  |  |  |  |  |  |  |  |  |  |  |  |  |  |  |  |  |  |  |  |  |  |  |  |  |  |  |  |  |  |  |  |  |  |  |  |  |  |  |  |  |  |  |  |  |  |  |  |  |  |  |  |  |  |  |  |  |  |  |  |  |  |  |  |  |  |  |  |  |  |  |  |  |  |  |  |  |  |  |  |  |  |  |  |  |  |  |  |  |  |  |  |  |  |  |  |  |  |  |  |  |  |  |  |  |  |  |  |  |  |  |  |  |  |  |  |  |  |  |  |  |  |  |  |  |  |  |  |  |  |  |  |  |  |  |  |  |  |  |  |  |  |  |  |  |  |  |  |  |  |  |  |  |  |  |  |  |  |  |  |  |  |  |  |  |  |  |  |  |  |  |  |  |  |  |  |  |  |  |  |  |  |  |  |  |  |  |  |  |  |  |  |  |  |  |  |  |  |  |  |  |  |  |  |  |  |  |  |  |  |  |  |  |  |  |  |  |  |  |  |  |  |  |  |  |  |  |  |  |  |  |  |  |  |  |  |  |  |  |  |  |  |  |  |  |  |  |  |  |  |  |  |  |  |  |  |  |  |  |  |  |  |  |  |  |  |  |  |  |  |  |  |  |  |  |  |  |  |  |  |  |  |  |  |  |  |  |  |  |  |  |  |  |  |  |  |  |  |  |  |  |  |  |  |  |  |  |  |  |  |  |  |  |  |  |  |  |  |  |  |  |  |  |  |  |  |  |  |  |  |  |  |  |  |  |  |  |  |  |  |  |  |  |  |  |  |  |  |  |  |  |  |  |  |  |  |  |  |  |  |  |  |  |  |  |  |  |  |  |  |  |  |  |  |  |  |  |  |  |  |  |  |  |  |  |  |  |  |  |  |  |  |  |  |  |  |  |  |  |  |  |  |  |  |  |  |  |  |  |  |  |  |  |  |  |  |  |  |  |  |  |  |  |  |  |  |  |  |  |  |  |  |  |  |  |  |  |  |  |  |  |  |  |  |  |  |  |  |  |  |  |  |  |  |  |  |  |  |  |  |  |  |  |  |  |  |  |  |  |  |  |  |  |  |  |  |  |  |  |  |  |  |  |  |  |  |  |  |  |  |  |  |  |  |  |  |  |  |  |  |  |  |  |  |  |  |  |  |  |  |  |  |  |  |  |  |  |  |  |  |  |  |  |  |  |  |  |  |  |  |  |  |  |  |  |  |  |  |  |  |  |    |
|-----------------------------------------------------------------------------------------------------------------------------------------------------------------------------------------------------------------------------------------------------------------------------------------------------------------|---------------------------------------------------------------------------------------------------------------------------------------------------------------------------------------------------------|--------------------------|-------------|----------|-----------------------|------------|----------|----------|------------|-------------------------------------------------------------------------------------------------------------------------------------------------------------------------|-------------------------------------------------------------------------------------|--|--|--|--|--|--|--|--|--|--|--|--|--|--|--|--|--|--|--|--|--|--|--|--|--|--|--|--|--|--|--|--|--|--|--|--|--|--|--|--|--|--|--|--|--|--|--|--|--|--|--|--|--|--|--|--|--|--|--|--|--|--|--|--|--|--|--|--|--|--|--|--|--|--|--|--|--|--|--|--|--|--|--|--|--|--|--|--|--|--|--|--|--|--|--|--|--|--|--|--|--|--|--|--|--|--|--|--|--|--|--|--|--|--|--|--|--|--|--|--|--|--|--|--|--|--|--|--|--|--|--|--|--|--|--|--|--|--|--|--|--|--|--|--|--|--|--|--|--|--|--|--|--|--|--|--|--|--|--|--|--|--|--|--|--|--|--|--|--|--|--|--|--|--|--|--|--|--|--|--|--|--|--|--|--|--|--|--|--|--|--|--|--|--|--|--|--|--|--|--|--|--|--|--|--|--|--|--|--|--|--|--|--|--|--|--|--|--|--|--|--|--|--|--|--|--|--|--|--|--|--|--|--|--|--|--|--|--|--|--|--|--|--|--|--|--|--|--|--|--|--|--|--|--|--|--|--|--|--|--|--|--|--|--|--|--|--|--|--|--|--|--|--|--|--|--|--|--|--|--|--|--|--|--|--|--|--|--|--|--|--|--|--|--|--|--|--|--|--|--|--|--|--|--|--|--|--|--|--|--|--|--|--|--|--|--|--|--|--|--|--|--|--|--|--|--|--|--|--|--|--|--|--|--|--|--|--|--|--|--|--|--|--|--|--|--|--|--|--|--|--|--|--|--|--|--|--|--|--|--|--|--|--|--|--|--|--|--|--|--|--|--|--|--|--|--|--|--|--|--|--|--|--|--|--|--|--|--|--|--|--|--|--|--|--|--|--|--|--|--|--|--|--|--|--|--|--|--|--|--|--|--|--|--|--|--|--|--|--|--|--|--|--|--|--|--|--|--|--|--|--|--|--|--|--|--|--|--|--|--|--|--|--|--|--|--|--|--|--|--|--|--|--|--|--|--|--|--|--|--|--|--|--|--|--|--|--|--|--|--|--|--|--|--|--|--|--|--|--|--|--|--|--|--|--|--|--|--|--|--|--|--|--|--|--|--|--|--|--|--|--|--|--|--|--|--|--|--|--|--|--|--|--|--|--|--|--|--|--|--|--|--|--|--|--|--|--|--|--|--|--|--|--|--|--|--|--|--|--|--|--|--|--|--|--|--|--|--|--|--|--|--|--|--|--|--|--|--|--|--|--|--|--|--|--|--|--|--|--|--|--|--|--|--|--|--|--|--|--|--|--|--|--|--|--|--|--|--|--|--|--|--|--|--|--|--|--|--|--|--|--|--|--|--|--|--|--|--|--|--|--|--|--|--|--|--|--|--|--|--|--|--|--|--|--|--|--|--|--|--|--|--|--|--|--|--|--|--|--|--|--|--|--|--|--|--|--|--|--|--|--|--|--|--|--|--|--|--|--|--|--|--|--|--|--|--|--|--|--|--|--|--|--|--|--|--|--|--|--|--|--|--|--|--|--|--|--|--|--|--|--|--|--|--|--|--|--|--|--|--|--|--|--|--|--|--|--|--|--|--|--|--|--|--|--|--|--|--|--|--|--|--|--|--|--|--|--|--|--|--|--|--|--|--|--|--|--|--|--|--|--|--|--|--|--|--|--|--|--|--|--|--|--|--|--|--|--|--|--|--|--|--|--|--|--|--|--|--|--|--|--|--|--|--|--|--|--|--|--|--|--|--|--|--|--|--|--|--|--|--|--|--|--|--|--|--|--|--|--|--|--|--|--|--|--|--|--|--|--|--|--|--|--|--|--|--|--|--|--|--|--|--|--|--|--|--|--|--|--|--|--|--|--|--|--|--|--|--|--|--|--|--|--|--|--|--|--|--|--|--|--|--|--|--|--|--|--|--|--|--|--|--|--|--|--|--|--|--|--|--|--|--|--|--|--|--|--|--|--|--|--|--|--|--|--|--|--|--|--|--|--|--|--|--|--|--|--|--|--|--|--|--|--|--|--|--|--|--|--|--|--|--|--|--|--|--|--|--|--|--|--|--|--|--|--|--|--|--|--|--|--|--|--|--|--|--|--|--|--|--|--|--|--|--|--|--|--|--|--|--|--|--|--|--|--|--|--|--|--|--|--|--|--|--|--|--|--|--|--|--|--|--|--|--|--|--|--|--|--|--|--|--|--|--|--|--|--|--|--|--|--|--|--|--|--|--|--|--|--|--|--|--|--|--|--|--|--|--|--|--|--|--|--|--|--|--|--|--|--|--|--|--|--|--|--|--|--|--|--|--|--|--|--|--|--|--|--|--|--|--|--|--|--|--|--|--|--|--|--|--|--|--|--|--|--|--|--|--|--|--|--|--|--|--|--|--|--|--|--|--|--|--|--|--|--|--|--|--|--|--|--|--|--|--|--|--|--|--|--|--|--|--|--|--|--|--|--|--|--|--|--|--|--|--|--|--|--|--|--|--|--|--|--|--|--|--|--|--|--|--|--|--|--|--|--|--|--|--|--|--|--|--|--|--|--|--|--|--|--|--|--|--|--|--|--|--|--|--|--|--|--|--|--|--|--|--|--|--|--|--|--|--|--|--|--|--|--|--|--|--|--|--|--|--|--|--|--|--|--|--|--|--|--|--|--|--|--|--|--|--|--|--|--|----|
| CONDICIONES:<br><br>ESTE PLANO Y LA INFORMACIÓN QUE CONTIENE SON DE PROPIEDAD INTELECTUAL DEL CLIENTE. SI EL PROYECTO AUTORIZACIÓN ESTA PROHIBIDA LA REPRODUCCIÓN DE LOS DATOS CONTENIDOS EN ESTE PLANO. SERA RESPONSABILIDAD DEL PROYECTISTA GARANTIZAR LA MÁXIMA RESPONSABILIDAD LEGAL POR PARTE DEL CLIENTE. | NOTAS:<br><br>1. LA INFORMACIÓN TOPOGRÁFICA ESTÁ EN EL SISTEMA UTM, DATUM DE WGS 84.<br>2. LA UNIDAD PARA LAS DIMENSIONES ES EN METROS Y MILÍMETROS.<br>3. LAS ESCALAS MUESTRAN EL PAÑO Y EL FORMATO A. | DOCUMENTOS DE REFERENCIA |             |          |                       | REVISIONES |          |          |            | CLIENTE:                                                                                                                                                                | PROYECTO:                                                                           |  |  |  |  |  |  |  |  |  |  |  |  |  |  |  |  |  |  |  |  |  |  |  |  |  |  |  |  |  |  |  |  |  |  |  |  |  |  |  |  |  |  |  |  |  |  |  |  |  |  |  |  |  |  |  |  |  |  |  |  |  |  |  |  |  |  |  |  |  |  |  |  |  |  |  |  |  |  |  |  |  |  |  |  |  |  |  |  |  |  |  |  |  |  |  |  |  |  |  |  |  |  |  |  |  |  |  |  |  |  |  |  |  |  |  |  |  |  |  |  |  |  |  |  |  |  |  |  |  |  |  |  |  |  |  |  |  |  |  |  |  |  |  |  |  |  |  |  |  |  |  |  |  |  |  |  |  |  |  |  |  |  |  |  |  |  |  |  |  |  |  |  |  |  |  |  |  |  |  |  |  |  |  |  |  |  |  |  |  |  |  |  |  |  |  |  |  |  |  |  |  |  |  |  |  |  |  |  |  |  |  |  |  |  |  |  |  |  |  |  |  |  |  |  |  |  |  |  |  |  |  |  |  |  |  |  |  |  |  |  |  |  |  |  |  |  |  |  |  |  |  |  |  |  |  |  |  |  |  |  |  |  |  |  |  |  |  |  |  |  |  |  |  |  |  |  |  |  |  |  |  |  |  |  |  |  |  |  |  |  |  |  |  |  |  |  |  |  |  |  |  |  |  |  |  |  |  |  |  |  |  |  |  |  |  |  |  |  |  |  |  |  |  |  |  |  |  |  |  |  |  |  |  |  |  |  |  |  |  |  |  |  |  |  |  |  |  |  |  |  |  |  |  |  |  |  |  |  |  |  |  |  |  |  |  |  |  |  |  |  |  |  |  |  |  |  |  |  |  |  |  |  |  |  |  |  |  |  |  |  |  |  |  |  |  |  |  |  |  |  |  |  |  |  |  |  |  |  |  |  |  |  |  |  |  |  |  |  |  |  |  |  |  |  |  |  |  |  |  |  |  |  |  |  |  |  |  |  |  |  |  |  |  |  |  |  |  |  |  |  |  |  |  |  |  |  |  |  |  |  |  |  |  |  |  |  |  |  |  |  |  |  |  |  |  |  |  |  |  |  |  |  |  |  |  |  |  |  |  |  |  |  |  |  |  |  |  |  |  |  |  |  |  |  |  |  |  |  |  |  |  |  |  |  |  |  |  |  |  |  |  |  |  |  |  |  |  |  |  |  |  |  |  |  |  |  |  |  |  |  |  |  |  |  |  |  |  |  |  |  |  |  |  |  |  |  |  |  |  |  |  |  |  |  |  |  |  |  |  |  |  |  |  |  |  |  |  |  |  |  |  |  |  |  |  |  |  |  |  |  |  |  |  |  |  |  |  |  |  |  |  |  |  |  |  |  |  |  |  |  |  |  |  |  |  |  |  |  |  |  |  |  |  |  |  |  |  |  |  |  |  |  |  |  |  |  |  |  |  |  |  |  |  |  |  |  |  |  |  |  |  |  |  |  |  |  |  |  |  |  |  |  |  |  |  |  |  |  |  |  |  |  |  |  |  |  |  |  |  |  |  |  |  |  |  |  |  |  |  |  |  |  |  |  |  |  |  |  |  |  |  |  |  |  |  |  |  |  |  |  |  |  |  |  |  |  |  |  |  |  |  |  |  |  |  |  |  |  |  |  |  |  |  |  |  |  |  |  |  |  |  |  |  |  |  |  |  |  |  |  |  |  |  |  |  |  |  |  |  |  |  |  |  |  |  |  |  |  |  |  |  |  |  |  |  |  |  |  |  |  |  |  |  |  |  |  |  |  |  |  |  |  |  |  |  |  |  |  |  |  |  |  |  |  |  |  |  |  |  |  |  |  |  |  |  |  |  |  |  |  |  |  |  |  |  |  |  |  |  |  |  |  |  |  |  |  |  |  |  |  |  |  |  |  |  |  |  |  |  |  |  |  |  |  |  |  |  |  |  |  |  |  |  |  |  |  |  |  |  |  |  |  |  |  |  |  |  |  |  |  |  |  |  |  |  |  |  |  |  |  |  |  |  |  |  |  |  |  |  |  |  |  |  |  |  |  |  |  |  |  |  |  |  |  |  |  |  |  |  |  |  |  |  |  |  |  |  |  |  |  |  |  |  |  |  |  |  |  |  |  |  |  |  |  |  |  |  |  |  |  |  |  |  |  |  |  |  |  |  |  |  |  |  |  |  |  |  |  |  |  |  |  |  |  |  |  |  |  |  |  |  |  |  |  |  |  |  |  |  |  |  |  |  |  |  |  |  |  |  |  |  |  |  |  |  |  |  |  |  |  |  |  |  |  |  |  |  |  |  |  |  |  |  |  |  |  |  |  |  |  |  |  |  |  |  |  |  |  |  |  |  |  |  |  |  |  |  |  |  |  |  |  |  |  |  |  |  |  |  |  |  |  |  |  |  |  |  |  |  |  |  |  |  |  |  |  |  |  |  |  |  |  |  |  |  |  |  |  |  |  |  |  |  |  |  |  |  |  |  |  |  |  |  |  |  |  |  |  |  |  |  |  |  |  |  |  |  |  |  |  |  |  |  |  |  |  |  |  |  |  |  |  |  |  |  |  |  |  |  |  |  |  |  |  |  |  |  |  |  |  |  |  |  |  |  |  |  |  |  |  |  |  |  |  |  |  |  |  |  |  |  |  |  |  |  |  |  |  |  |  |  |  |  |  |  |  |  |  |  |  |  |  |  |    |
|                                                                                                                                                                                                                                                                                                                 |                                                                                                                                                                                                         | REV.                     | DESCRIPCIÓN | FECHA    | DESCRIPCIÓN           | DEBIDO     | PREPARO  | APROBADO | AUTORIZADO |   |  |  |  |  |  |  |  |  |  |  |  |  |  |  |  |  |  |  |  |  |  |  |  |  |  |  |  |  |  |  |  |  |  |  |  |  |  |  |  |  |  |  |  |  |  |  |  |  |  |  |  |  |  |  |  |  |  |  |  |  |  |  |  |  |  |  |  |  |  |  |  |  |  |  |  |  |  |  |  |  |  |  |  |  |  |  |  |  |  |  |  |  |  |  |  |  |  |  |  |  |  |  |  |  |  |  |  |  |  |  |  |  |  |  |  |  |  |  |  |  |  |  |  |  |  |  |  |  |  |  |  |  |  |  |  |  |  |  |  |  |  |  |  |  |  |  |  |  |  |  |  |  |  |  |  |  |  |  |  |  |  |  |  |  |  |  |  |  |  |  |  |  |  |  |  |  |  |  |  |  |  |  |  |  |  |  |  |  |  |  |  |  |  |  |  |  |  |  |  |  |  |  |  |  |  |  |  |  |  |  |  |  |  |  |  |  |  |  |  |  |  |  |  |  |  |  |  |  |  |  |  |  |  |  |  |  |  |  |  |  |  |  |  |  |  |  |  |  |  |  |  |  |  |  |  |  |  |  |  |  |  |  |  |  |  |  |  |  |  |  |  |  |  |  |  |  |  |  |  |  |  |  |  |  |  |  |  |  |  |  |  |  |  |  |  |  |  |  |  |  |  |  |  |  |  |  |  |  |  |  |  |  |  |  |  |  |  |  |  |  |  |  |  |  |  |  |  |  |  |  |  |  |  |  |  |  |  |  |  |  |  |  |  |  |  |  |  |  |  |  |  |  |  |  |  |  |  |  |  |  |  |  |  |  |  |  |  |  |  |  |  |  |  |  |  |  |  |  |  |  |  |  |  |  |  |  |  |  |  |  |  |  |  |  |  |  |  |  |  |  |  |  |  |  |  |  |  |  |  |  |  |  |  |  |  |  |  |  |  |  |  |  |  |  |  |  |  |  |  |  |  |  |  |  |  |  |  |  |  |  |  |  |  |  |  |  |  |  |  |  |  |  |  |  |  |  |  |  |  |  |  |  |  |  |  |  |  |  |  |  |  |  |  |  |  |  |  |  |  |  |  |  |  |  |  |  |  |  |  |  |  |  |  |  |  |  |  |  |  |  |  |  |  |  |  |  |  |  |  |  |  |  |  |  |  |  |  |  |  |  |  |  |  |  |  |  |  |  |  |  |  |  |  |  |  |  |  |  |  |  |  |  |  |  |  |  |  |  |  |  |  |  |  |  |  |  |  |  |  |  |  |  |  |  |  |  |  |  |  |  |  |  |  |  |  |  |  |  |  |  |  |  |  |  |  |  |  |  |  |  |  |  |  |  |  |  |  |  |  |  |  |  |  |  |  |  |  |  |  |  |  |  |  |  |  |  |  |  |  |  |  |  |  |  |  |  |  |  |  |  |  |  |  |  |  |  |  |  |  |  |  |  |  |  |  |  |  |  |  |  |  |  |  |  |  |  |  |  |  |  |  |  |  |  |  |  |  |  |  |  |  |  |  |  |  |  |  |  |  |  |  |  |  |  |  |  |  |  |  |  |  |  |  |  |  |  |  |  |  |  |  |  |  |  |  |  |  |  |  |  |  |  |  |  |  |  |  |  |  |  |  |  |  |  |  |  |  |  |  |  |  |  |  |  |  |  |  |  |  |  |  |  |  |  |  |  |  |  |  |  |  |  |  |  |  |  |  |  |  |  |  |  |  |  |  |  |  |  |  |  |  |  |  |  |  |  |  |  |  |  |  |  |  |  |  |  |  |  |  |  |  |  |  |  |  |  |  |  |  |  |  |  |  |  |  |  |  |  |  |  |  |  |  |  |  |  |  |  |  |  |  |  |  |  |  |  |  |  |  |  |  |  |  |  |  |  |  |  |  |  |  |  |  |  |  |  |  |  |  |  |  |  |  |  |  |  |  |  |  |  |  |  |  |  |  |  |  |  |  |  |  |  |  |  |  |  |  |  |  |  |  |  |  |  |  |  |  |  |  |  |  |  |  |  |  |  |  |  |  |  |  |  |  |  |  |  |  |  |  |  |  |  |  |  |  |  |  |  |  |  |  |  |  |  |  |  |  |  |  |  |  |  |  |  |  |  |  |  |  |  |  |  |  |  |  |  |  |  |  |  |  |  |  |  |  |  |  |  |  |  |  |  |  |  |  |  |  |  |  |  |  |  |  |  |  |  |  |  |  |  |  |  |  |  |  |  |  |  |  |  |  |  |  |  |  |  |  |  |  |  |  |  |  |  |  |  |  |  |  |  |  |  |  |  |  |  |  |  |  |  |  |  |  |  |  |  |  |  |  |  |  |  |  |  |  |  |  |  |  |  |  |  |  |  |  |  |  |  |  |  |  |  |  |  |  |  |  |  |  |  |  |  |  |  |  |  |  |  |  |  |  |  |  |  |  |  |  |  |  |  |  |  |  |  |  |  |  |  |  |  |  |  |  |  |  |  |  |  |  |  |  |  |  |  |  |  |  |  |  |  |  |  |  |  |  |  |  |  |  |  |  |  |  |  |  |  |  |  |  |  |  |  |  |  |  |  |  |  |  |  |  |  |  |  |  |  |  |  |  |  |  |  |  |  |  |  |  |  |  |  |  |  |  |  |  |  |  |  |  |  |  |  |  |  |  |  |  |  |  |  |  |  |  |  |  |  |  |  |  |  |  |  |  |  |    |
|                                                                                                                                                                                                                                                                                                                 |                                                                                                                                                                                                         | A                        |             | 04/07/23 | EMITIDO PARA REVISIÓN | S-BLANCO   | S-BLANCO | N. MORI  | N. MORI    |                                                                                                                                                                         |                                                                                     |  |  |  |  |  |  |  |  |  |  |  |  |  |  |  |  |  |  |  |  |  |  |  |  |  |  |  |  |  |  |  |  |  |  |  |  |  |  |  |  |  |  |  |  |  |  |  |  |  |  |  |  |  |  |  |  |  |  |  |  |  |  |  |  |  |  |  |  |  |  |  |  |  |  |  |  |  |  |  |  |  |  |  |  |  |  |  |  |  |  |  |  |  |  |  |  |  |  |  |  |  |  |  |  |  |  |  |  |  |  |  |  |  |  |  |  |  |  |  |  |  |  |  |  |  |  |  |  |  |  |  |  |  |  |  |  |  |  |  |  |  |  |  |  |  |  |  |  |  |  |  |  |  |  |  |  |  |  |  |  |  |  |  |  |  |  |  |  |  |  |  |  |  |  |  |  |  |  |  |  |  |  |  |  |  |  |  |  |  |  |  |  |  |  |  |  |  |  |  |  |  |  |  |  |  |  |  |  |  |  |  |  |  |  |  |  |  |  |  |  |  |  |  |  |  |  |  |  |  |  |  |  |  |  |  |  |  |  |  |  |  |  |  |  |  |  |  |  |  |  |  |  |  |  |  |  |  |  |  |  |  |  |  |  |  |  |  |  |  |  |  |  |  |  |  |  |  |  |  |  |  |  |  |  |  |  |  |  |  |  |  |  |  |  |  |  |  |  |  |  |  |  |  |  |  |  |  |  |  |  |  |  |  |  |  |  |  |  |  |  |  |  |  |  |  |  |  |  |  |  |  |  |  |  |  |  |  |  |  |  |  |  |  |  |  |  |  |  |  |  |  |  |  |  |  |  |  |  |  |  |  |  |  |  |  |  |  |  |  |  |  |  |  |  |  |  |  |  |  |  |  |  |  |  |  |  |  |  |  |  |  |  |  |  |  |  |  |  |  |  |  |  |  |  |  |  |  |  |  |  |  |  |  |  |  |  |  |  |  |  |  |  |  |  |  |  |  |  |  |  |  |  |  |  |  |  |  |  |  |  |  |  |  |  |  |  |  |  |  |  |  |  |  |  |  |  |  |  |  |  |  |  |  |  |  |  |  |  |  |  |  |  |  |  |  |  |  |  |  |  |  |  |  |  |  |  |  |  |  |  |  |  |  |  |  |  |  |  |  |  |  |  |  |  |  |  |  |  |  |  |  |  |  |  |  |  |  |  |  |  |  |  |  |  |  |  |  |  |  |  |  |  |  |  |  |  |  |  |  |  |  |  |  |  |  |  |  |  |  |  |  |  |  |  |  |  |  |  |  |  |  |  |  |  |  |  |  |  |  |  |  |  |  |  |  |  |  |  |  |  |  |  |  |  |  |  |  |  |  |  |  |  |  |  |  |  |  |  |  |  |  |  |  |  |  |  |  |  |  |  |  |  |  |  |  |  |  |  |  |  |  |  |  |  |  |  |  |  |  |  |  |  |  |  |  |  |  |  |  |  |  |  |  |  |  |  |  |  |  |  |  |  |  |  |  |  |  |  |  |  |  |  |  |  |  |  |  |  |  |  |  |  |  |  |  |  |  |  |  |  |  |  |  |  |  |  |  |  |  |  |  |  |  |  |  |  |  |  |  |  |  |  |  |  |  |  |  |  |  |  |  |  |  |  |  |  |  |  |  |  |  |  |  |  |  |  |  |  |  |  |  |  |  |  |  |  |  |  |  |  |  |  |  |  |  |  |  |  |  |  |  |  |  |  |  |  |  |  |  |  |  |  |  |  |  |  |  |  |  |  |  |  |  |  |  |  |  |  |  |  |  |  |  |  |  |  |  |  |  |  |  |  |  |  |  |  |  |  |  |  |  |  |  |  |  |  |  |  |  |  |  |  |  |  |  |  |  |  |  |  |  |  |  |  |  |  |  |  |  |  |  |  |  |  |  |  |  |  |  |  |  |  |  |  |  |  |  |  |  |  |  |  |  |  |  |  |  |  |  |  |  |  |  |  |  |  |  |  |  |  |  |  |  |  |  |  |  |  |  |  |  |  |  |  |  |  |  |  |  |  |  |  |  |  |  |  |  |  |  |  |  |  |  |  |  |  |  |  |  |  |  |  |  |  |  |  |  |  |  |  |  |  |  |  |  |  |  |  |  |  |  |  |  |  |  |  |  |  |  |  |  |  |  |  |  |  |  |  |  |  |  |  |  |  |  |  |  |  |  |  |  |  |  |  |  |  |  |  |  |  |  |  |  |  |  |  |  |  |  |  |  |  |  |  |  |  |  |  |  |  |  |  |  |  |  |  |  |  |  |  |  |  |  |  |  |  |  |  |  |  |  |  |  |  |  |  |  |  |  |  |  |  |  |  |  |  |  |  |  |  |  |  |  |  |  |  |  |  |  |  |  |  |  |  |  |  |  |  |  |  |  |  |  |  |  |  |  |  |  |  |  |  |  |  |  |  |  |  |  |  |  |  |  |  |  |  |  |  |  |  |  |  |  |  |  |  |  |  |  |  |  |  |  |  |  |  |  |  |  |  |  |  |  |  |  |  |  |  |  |  |  |  |  |  |  |  |  |  |  |  |  |  |  |  |  |  |  |  |  |  |  |  |  |  |  |  |  |  |  |  |  |  |  |  |  |  |  |  |  |  |  |  |  |  |  |  |  |  |  |  |  |  |  |  |  |  |  |  |  |  |  |  |  |  |  |  |  |  |  |  |  |  |  |  |  |  |  |  |  |  |  |  |  |    |
|                                                                                                                                                                                                                                                                                                                 |                                                                                                                                                                                                         |                          |             |          |                       |            |          |          |            |                                                                                                                                                                         |                                                                                     |  |  |  |  |  |  |  |  |  |  |  |  |  |  |  |  |  |  |  |  |  |  |  |  |  |  |  |  |  |  |  |  |  |  |  |  |  |  |  |  |  |  |  |  |  |  |  |  |  |  |  |  |  |  |  |  |  |  |  |  |  |  |  |  |  |  |  |  |  |  |  |  |  |  |  |  |  |  |  |  |  |  |  |  |  |  |  |  |  |  |  |  |  |  |  |  |  |  |  |  |  |  |  |  |  |  |  |  |  |  |  |  |  |  |  |  |  |  |  |  |  |  |  |  |  |  |  |  |  |  |  |  |  |  |  |  |  |  |  |  |  |  |  |  |  |  |  |  |  |  |  |  |  |  |  |  |  |  |  |  |  |  |  |  |  |  |  |  |  |  |  |  |  |  |  |  |  |  |  |  |  |  |  |  |  |  |  |  |  |  |  |  |  |  |  |  |  |  |  |  |  |  |  |  |  |  |  |  |  |  |  |  |  |  |  |  |  |  |  |  |  |  |  |  |  |  |  |  |  |  |  |  |  |  |  |  |  |  |  |  |  |  |  |  |  |  |  |  |  |  |  |  |  |  |  |  |  |  |  |  |  |  |  |  |  |  |  |  |  |  |  |  |  |  |  |  |  |  |  |  |  |  |  |  |  |  |  |  |  |  |  |  |  |  |  |  |  |  |  |  |  |  |  |  |  |  |  |  |  |  |  |  |  |  |  |  |  |  |  |  |  |  |  |  |  |  |  |  |  |  |  |  |  |  |  |  |  |  |  |  |  |  |  |  |  |  |  |  |  |  |  |  |  |  |  |  |  |  |  |  |  |  |  |  |  |  |  |  |  |  |  |  |  |  |  |  |  |  |  |  |  |  |  |  |  |  |  |  |  |  |  |  |  |  |  |  |  |  |  |  |  |  |  |  |  |  |  |  |  |  |  |  |  |  |  |  |  |  |  |  |  |  |  |  |  |  |  |  |  |  |  |  |  |  |  |  |  |  |  |  |  |  |  |  |  |  |  |  |  |  |  |  |  |  |  |  |  |  |  |  |  |  |  |  |  |  |  |  |  |  |  |  |  |  |  |  |  |  |  |  |  |  |  |  |  |  |  |  |  |  |  |  |  |  |  |  |  |  |  |  |  |  |  |  |  |  |  |  |  |  |  |  |  |  |  |  |  |  |  |  |  |  |  |  |  |  |  |  |  |  |  |  |  |  |  |  |  |  |  |  |  |  |  |  |  |  |  |  |  |  |  |  |  |  |  |  |  |  |  |  |  |  |  |  |  |  |  |  |  |  |  |  |  |  |  |  |  |  |  |  |  |  |  |  |  |  |  |  |  |  |  |  |  |  |  |  |  |  |  |  |  |  |  |  |  |  |  |  |  |  |  |  |  |  |  |  |  |  |  |  |  |  |  |  |  |  |  |  |  |  |  |  |  |  |  |  |  |  |  |  |  |  |  |  |  |  |  |  |  |  |  |  |  |  |  |  |  |  |  |  |  |  |  |  |  |  |  |  |  |  |  |  |  |  |  |  |  |  |  |  |  |  |  |  |  |  |  |  |  |  |  |  |  |  |  |  |  |  |  |  |  |  |  |  |  |  |  |  |  |  |  |  |  |  |  |  |  |  |  |  |  |  |  |  |  |  |  |  |  |  |  |  |  |  |  |  |  |  |  |  |  |  |  |  |  |  |  |  |  |  |  |  |  |  |  |  |  |  |  |  |  |  |  |  |  |  |  |  |  |  |  |  |  |  |  |  |  |  |  |  |  |  |  |  |  |  |  |  |  |  |  |  |  |  |  |  |  |  |  |  |  |  |  |  |  |  |  |  |  |  |  |  |  |  |  |  |  |  |  |  |  |  |  |  |  |  |  |  |  |  |  |  |  |  |  |  |  |  |  |  |  |  |  |  |  |  |  |  |  |  |  |  |  |  |  |  |  |  |  |  |  |  |  |  |  |  |  |  |  |  |  |  |  |  |  |  |  |  |  |  |  |  |  |  |  |  |  |  |  |  |  |  |  |  |  |  |  |  |  |  |  |  |  |  |  |  |  |  |  |  |  |  |  |  |  |  |  |  |  |  |  |  |  |  |  |  |  |  |  |  |  |  |  |  |  |  |  |  |  |  |  |  |  |  |  |  |  |  |  |  |  |  |  |  |  |  |  |  |  |  |  |  |  |  |  |  |  |  |  |  |  |  |  |  |  |  |  |  |  |  |  |  |  |  |  |  |  |  |  |  |  |  |  |  |  |  |  |  |  |  |  |  |  |  |  |  |  |  |  |  |  |  |  |  |  |  |  |  |  |  |  |  |  |  |  |  |  |  |  |  |  |  |  |  |  |  |  |  |  |  |  |  |  |  |  |  |  |  |  |  |  |  |  |  |  |  |  |  |  |  |  |  |  |  |  |  |  |  |  |  |  |  |  |  |  |  |  |  |  |  |  |  |  |  |  |  |  |  |  |  |  |  |  |  |  |  |  |  |  |  |  |  |  |  |  |  |  |  |  |  |  |  |  |  |  |  |  |  |  |  |  |  |  |  |  |  |  |  |  |  |  |  |  |  |  |  |  |  |  |  |  |  |  |  |  |  |  |  |  |  |  |  |  |  |  |  |  |  |  |  |  |  |  |  |  |  |  |  |  |  |  |  |  |  |  |  |  |  |  |  |  |  |  |  |  |  |  |  |  |  |  |  |  |    |
|                                                                                                                                                                                                                                                                                                                 |                                                                                                                                                                                                         |                          |             |          |                       |            |          |          |            |                                                                                                                                                                         |                                                                                     |  |  |  |  |  |  |  |  |  |  |  |  |  |  |  |  |  |  |  |  |  |  |  |  |  |  |  |  |  |  |  |  |  |  |  |  |  |  |  |  |  |  |  |  |  |  |  |  |  |  |  |  |  |  |  |  |  |  |  |  |  |  |  |  |  |  |  |  |  |  |  |  |  |  |  |  |  |  |  |  |  |  |  |  |  |  |  |  |  |  |  |  |  |  |  |  |  |  |  |  |  |  |  |  |  |  |  |  |  |  |  |  |  |  |  |  |  |  |  |  |  |  |  |  |  |  |  |  |  |  |  |  |  |  |  |  |  |  |  |  |  |  |  |  |  |  |  |  |  |  |  |  |  |  |  |  |  |  |  |  |  |  |  |  |  |  |  |  |  |  |  |  |  |  |  |  |  |  |  |  |  |  |  |  |  |  |  |  |  |  |  |  |  |  |  |  |  |  |  |  |  |  |  |  |  |  |  |  |  |  |  |  |  |  |  |  |  |  |  |  |  |  |  |  |  |  |  |  |  |  |  |  |  |  |  |  |  |  |  |  |  |  |  |  |  |  |  |  |  |  |  |  |  |  |  |  |  |  |  |  |  |  |  |  |  |  |  |  |  |  |  |  |  |  |  |  |  |  |  |  |  |  |  |  |  |  |  |  |  |  |  |  |  |  |  |  |  |  |  |  |  |  |  |  |  |  |  |  |  |  |  |  |  |  |  |  |  |  |  |  |  |  |  |  |  |  |  |  |  |  |  |  |  |  |  |  |  |  |  |  |  |  |  |  |  |  |  |  |  |  |  |  |  |  |  |  |  |  |  |  |  |  |  |  |  |  |  |  |  |  |  |  |  |  |  |  |  |  |  |  |  |  |  |  |  |  |  |  |  |  |  |  |  |  |  |  |  |  |  |  |  |  |  |  |  |  |  |  |  |  |  |  |  |  |  |  |  |  |  |  |  |  |  |  |  |  |  |  |  |  |  |  |  |  |  |  |  |  |  |  |  |  |  |  |  |  |  |  |  |  |  |  |  |  |  |  |  |  |  |  |  |  |  |  |  |  |  |  |  |  |  |  |  |  |  |  |  |  |  |  |  |  |  |  |  |  |  |  |  |  |  |  |  |  |  |  |  |  |  |  |  |  |  |  |  |  |  |  |  |  |  |  |  |  |  |  |  |  |  |  |  |  |  |  |  |  |  |  |  |  |  |  |  |  |  |  |  |  |  |  |  |  |  |  |  |  |  |  |  |  |  |  |  |  |  |  |  |  |  |  |  |  |  |  |  |  |  |  |  |  |  |  |  |  |  |  |  |  |  |  |  |  |  |  |  |  |  |  |  |  |  |  |  |  |  |  |  |  |  |  |  |  |  |  |  |  |  |  |  |  |  |  |  |  |  |  |  |  |  |  |  |  |  |  |  |  |  |  |  |  |  |  |  |  |  |  |  |  |  |  |  |  |  |  |  |  |  |  |  |  |  |  |  |  |  |  |  |  |  |  |  |  |  |  |  |  |  |  |  |  |  |  |  |  |  |  |  |  |  |  |  |  |  |  |  |  |  |  |  |  |  |  |  |  |  |  |  |  |  |  |  |  |  |  |  |  |  |  |  |  |  |  |  |  |  |  |  |  |  |  |  |  |  |  |  |  |  |  |  |  |  |  |  |  |  |  |  |  |  |  |  |  |  |  |  |  |  |  |  |  |  |  |  |  |  |  |  |  |  |  |  |  |  |  |  |  |  |  |  |  |  |  |  |  |  |  |  |  |  |  |  |  |  |  |  |  |  |  |  |  |  |  |  |  |  |  |  |  |  |  |  |  |  |  |  |  |  |  |  |  |  |  |  |  |  |  |  |  |  |  |  |  |  |  |  |  |  |  |  |  |  |  |  |  |  |  |  |  |  |  |  |  |  |  |  |  |  |  |  |  |  |  |  |  |  |  |  |  |  |  |  |  |  |  |  |  |  |  |  |  |  |  |  |  |  |  |  |  |  |  |  |  |  |  |  |  |  |  |  |  |  |  |  |  |  |  |  |  |  |  |  |  |  |  |  |  |  |  |  |  |  |  |  |  |  |  |  |  |  |  |  |  |  |  |  |  |  |  |  |  |  |  |  |  |  |  |  |  |  |  |  |  |  |  |  |  |  |  |  |  |  |  |  |  |  |  |  |  |  |  |  |  |  |  |  |  |  |  |  |  |  |  |  |  |  |  |  |  |  |  |  |  |  |  |  |  |  |  |  |  |  |  |  |  |  |  |  |  |  |  |  |  |  |  |  |  |  |  |  |  |  |  |  |  |  |  |  |  |  |  |  |  |  |  |  |  |  |  |  |  |  |  |  |  |  |  |  |  |  |  |  |  |  |  |  |  |  |  |  |  |  |  |  |  |  |  |  |  |  |  |  |  |  |  |  |  |  |  |  |  |  |  |  |  |  |  |  |  |  |  |  |  |  |  |  |  |  |  |  |  |  |  |  |  |  |  |  |  |  |  |  |  |  |  |  |  |  |  |  |  |  |  |  |  |  |  |  |  |  |  |  |  |  |  |  |  |  |  |  |  |  |  |  |  |  |  |  |  |  |  |  |  |  |  |  |  |  |  |  |  |  |  |  |  |  |  |  |  |  |  |  |  |  |  |  |  |  |  |  |  |  |  |  |  |  |  |  |  |  |  |  |  |  |  |  |  |  |  |  |  |  |  |  |    |
|                                                                                                                                                                                                                                                                                                                 |                                                                                                                                                                                                         |                          |             |          |                       |            |          |          |            |                                                                                                                                                                         |                                                                                     |  |  |  |  |  |  |  |  |  |  |  |  |  |  |  |  |  |  |  |  |  |  |  |  |  |  |  |  |  |  |  |  |  |  |  |  |  |  |  |  |  |  |  |  |  |  |  |  |  |  |  |  |  |  |  |  |  |  |  |  |  |  |  |  |  |  |  |  |  |  |  |  |  |  |  |  |  |  |  |  |  |  |  |  |  |  |  |  |  |  |  |  |  |  |  |  |  |  |  |  |  |  |  |  |  |  |  |  |  |  |  |  |  |  |  |  |  |  |  |  |  |  |  |  |  |  |  |  |  |  |  |  |  |  |  |  |  |  |  |  |  |  |  |  |  |  |  |  |  |  |  |  |  |  |  |  |  |  |  |  |  |  |  |  |  |  |  |  |  |  |  |  |  |  |  |  |  |  |  |  |  |  |  |  |  |  |  |  |  |  |  |  |  |  |  |  |  |  |  |  |  |  |  |  |  |  |  |  |  |  |  |  |  |  |  |  |  |  |  |  |  |  |  |  |  |  |  |  |  |  |  |  |  |  |  |  |  |  |  |  |  |  |  |  |  |  |  |  |  |  |  |  |  |  |  |  |  |  |  |  |  |  |  |  |  |  |  |  |  |  |  |  |  |  |  |  |  |  |  |  |  |  |  |  |  |  |  |  |  |  |  |  |  |  |  |  |  |  |  |  |  |  |  |  |  |  |  |  |  |  |  |  |  |  |  |  |  |  |  |  |  |  |  |  |  |  |  |  |  |  |  |  |  |  |  |  |  |  |  |  |  |  |  |  |  |  |  |  |  |  |  |  |  |  |  |  |  |  |  |  |  |  |  |  |  |  |  |  |  |  |  |  |  |  |  |  |  |  |  |  |  |  |  |  |  |  |  |  |  |  |  |  |  |  |  |  |  |  |  |  |  |  |  |  |  |  |  |  |  |  |  |  |  |  |  |  |  |  |  |  |  |  |  |  |  |  |  |  |  |  |  |  |  |  |  |  |  |  |  |  |  |  |  |  |  |  |  |  |  |  |  |  |  |  |  |  |  |  |  |  |  |  |  |  |  |  |  |  |  |  |  |  |  |  |  |  |  |  |  |  |  |  |  |  |  |  |  |  |  |  |  |  |  |  |  |  |  |  |  |  |  |  |  |  |  |  |  |  |  |  |  |  |  |  |  |  |  |  |  |  |  |  |  |  |  |  |  |  |  |  |  |  |  |  |  |  |  |  |  |  |  |  |  |  |  |  |  |  |  |  |  |  |  |  |  |  |  |  |  |  |  |  |  |  |  |  |  |  |  |  |  |  |  |  |  |  |  |  |  |  |  |  |  |  |  |  |  |  |  |  |  |  |  |  |  |  |  |  |  |  |  |  |  |  |  |  |  |  |  |  |  |  |  |  |  |  |  |  |  |  |  |  |  |  |  |  |  |  |  |  |  |  |  |  |  |  |  |  |  |  |  |  |  |  |  |  |  |  |  |  |  |  |  |  |  |  |  |  |  |  |  |  |  |  |  |  |  |  |  |  |  |  |  |  |  |  |  |  |  |  |  |  |  |  |  |  |  |  |  |  |  |  |  |  |  |  |  |  |  |  |  |  |  |  |  |  |  |  |  |  |  |  |  |  |  |  |  |  |  |  |  |  |  |  |  |  |  |  |  |  |  |  |  |  |  |  |  |  |  |  |  |  |  |  |  |  |  |  |  |  |  |  |  |  |  |  |  |  |  |  |  |  |  |  |  |  |  |  |  |  |  |  |  |  |  |  |  |  |  |  |  |  |  |  |  |  |  |  |  |  |  |  |  |  |  |  |  |  |  |  |  |  |  |  |  |  |  |  |  |  |  |  |  |  |  |  |  |  |  |  |  |  |  |  |  |  |  |  |  |  |  |  |  |  |  |  |  |  |  |  |  |  |  |  |  |  |  |  |  |  |  |  |  |  |  |  |  |  |  |  |  |  |  |  |  |  |  |  |  |  |  |  |  |  |  |  |  |  |  |  |  |  |  |  |  |  |  |  |  |  |  |  |  |  |  |  |  |  |  |  |  |  |  |  |  |  |  |  |  |  |  |  |  |  |  |  |  |  |  |  |  |  |  |  |  |  |  |  |  |  |  |  |  |  |  |  |  |  |  |  |  |  |  |  |  |  |  |  |  |  |  |  |  |  |  |  |  |  |  |  |  |  |  |  |  |  |  |  |  |  |  |  |  |  |  |  |  |  |  |  |  |  |  |  |  |  |  |  |  |  |  |  |  |  |  |  |  |  |  |  |  |  |  |  |  |  |  |  |  |  |  |  |  |  |  |  |  |  |  |  |  |  |  |  |  |  |  |  |  |  |  |  |  |  |  |  |  |  |  |  |  |  |  |  |  |  |  |  |  |  |  |  |  |  |  |  |  |  |  |  |  |  |  |  |  |  |  |  |  |  |  |  |  |  |  |  |  |  |  |  |  |  |  |  |  |  |  |  |  |  |  |  |  |  |  |  |  |  |  |  |  |  |  |  |  |  |  |  |  |  |  |  |  |  |  |  |  |  |  |  |  |  |  |  |  |  |  |  |  |  |  |  |  |  |  |  |  |  |  |  |  |  |  |  |  |  |  |  |  |  |  |  |  |  |  |  |  |  |  |  |  |  |  |  |  |  |  |  |  |  |  |  |  |  |  |  |  |  |  |  |  |  |  |  |  |  |  |  |  |  |  |  |  | </ |



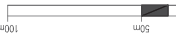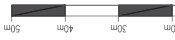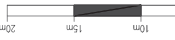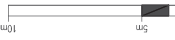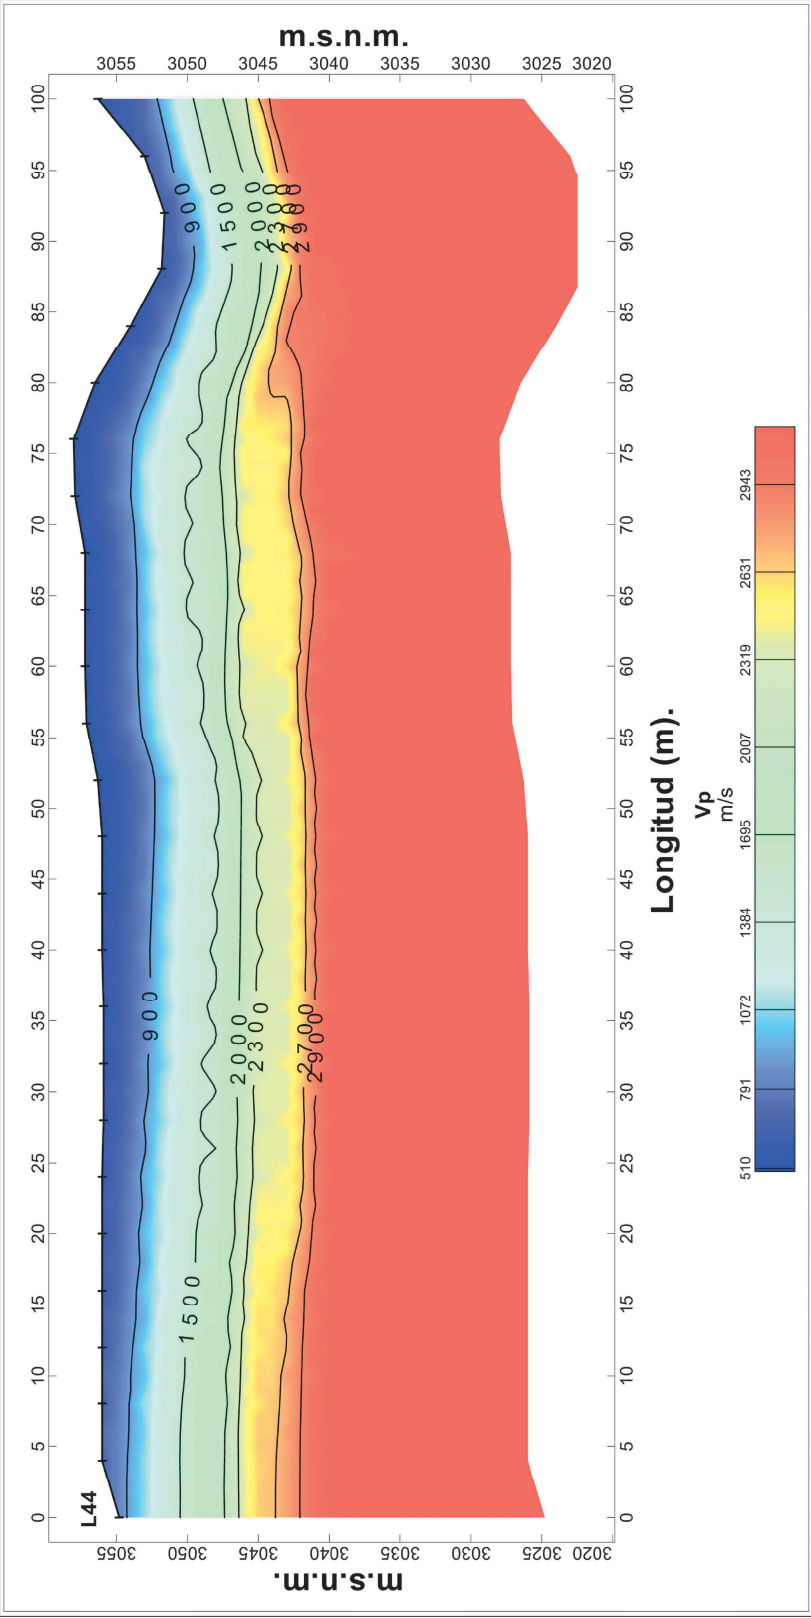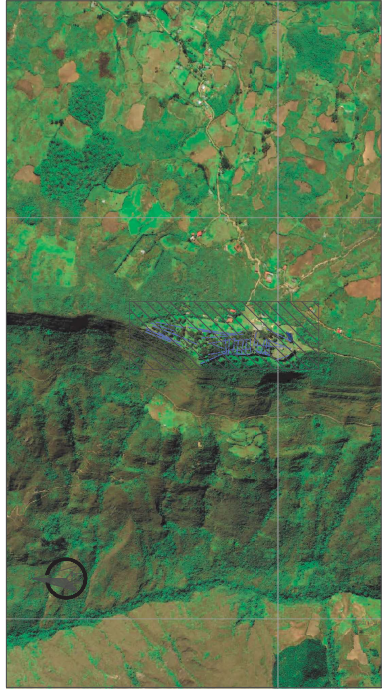

PLANO DE LOCALIZACIÓN DEL PROYECTO  
ESCALA 1/1000

|                                                                                                                                                                                                                                                                           |        |                                                                                                                                                                                    |            |             |                       |                                        |          |                                                                                                                                                                              |          |
|---------------------------------------------------------------------------------------------------------------------------------------------------------------------------------------------------------------------------------------------------------------------------|--------|------------------------------------------------------------------------------------------------------------------------------------------------------------------------------------|------------|-------------|-----------------------|----------------------------------------|----------|------------------------------------------------------------------------------------------------------------------------------------------------------------------------------|----------|
| CONFIDENCIAL                                                                                                                                                                                                                                                              | NOTAS: | DOCUMENTOS DE REFERENCIA                                                                                                                                                           | REVISIONES |             |                       |                                        | CLIENTE: | PROYECTO:                                                                                                                                                                    |          |
|                                                                                                                                                                                                                                                                           |        |                                                                                                                                                                                    | REV.       | FECHA       | DESCRIPCIÓN           | PREPARO                                | APROBÓ   |                                                                                                                                                                              | AUTORIZÓ |
|                                                                                                                                                                                                                                                                           |        |                                                                                                                                                                                    | A          | 04/07/23    | EMITIDO PARA REVISIÓN | S-BLANCO                               | N. MORI  |                                                                                                                                                                              | N. MORI  |
|                                                                                                                                                                                                                                                                           |        |                                                                                                                                                                                    |            |             |                       |                                        |          |                                                                                                                                                                              |          |
|                                                                                                                                                                                                                                                                           |        |                                                                                                                                                                                    |            |             |                       |                                        |          |                                                                                                                                                                              |          |
| ESTE PLANO Y LA INFORMACIÓN CONTENIDA SON PROPIEDAD DEL CLIENTE. SU USO SIN PERMISO POR ESCRITO DEL CONSULTOR, INCLUIDA CUALQUIER MODIFICACIÓN DE LOS DATOS CONTENIDOS EN ESTE PLANO, SERÁ LA RESPONSABILIDAD DEL CLIENTE. NINGUNA RESPONSABILIDAD POR PARTE DEL CLIENTE. |        | 1. LA INFORMACIÓN TOPOGRÁFICA ESTÁ EN EL SISTEMA UTM NISPA, ZONA 18 SUR.<br>2. LAS ESKALAS DE LOS PLANOS SON EN METROS Y VENTENAS.<br>3. LAS ESKALAS MOSTRADAS EN ESTE FORMATO A1. |            | DESCRIPCIÓN |                       | Ing.Nilsson Mori Sánchez<br>CIP 175217 |          | CONTRATACIÓN DE SERVICIO PARA LA DETERMINACIÓN DE LA ESTRATIGRAFÍA DE ÁREA NUCLEAR DE LA ZONA ARQUEOLÓGICA MONUMENTAL DE KUELAP<br>NÚMERO DE CONTRATO: Nº 030-2023-OGA-SG/MC |          |
|                                                                                                                                                                                                                                                                           |        |                                                                                                                                                                                    |            |             |                       | CONSULTOR:                             |          | TÍTULO:                                                                                                                                                                      |          |
|                                                                                                                                                                                                                                                                           |        |                                                                                                                                                                                    |            |             |                       |                                        |          | PLANO DE PERFILES SISMICOS                                                                                                                                                   |          |
|                                                                                                                                                                                                                                                                           |        |                                                                                                                                                                                    |            |             |                       |                                        |          | ESTUDIOS DE GEOFISICA                                                                                                                                                        |          |
|                                                                                                                                                                                                                                                                           |        | REVISIONES PREVIAS                                                                                                                                                                 |            |             |                       |                                        |          | ESCALA: GRAFICA                                                                                                                                                              |          |
|                                                                                                                                                                                                                                                                           |        |                                                                                                                                                                                    |            |             |                       |                                        |          | PLANO Nº: LS-44                                                                                                                                                              |          |
|                                                                                                                                                                                                                                                                           |        |                                                                                                                                                                                    |            |             |                       |                                        |          | REV. A                                                                                                                                                                       |          |

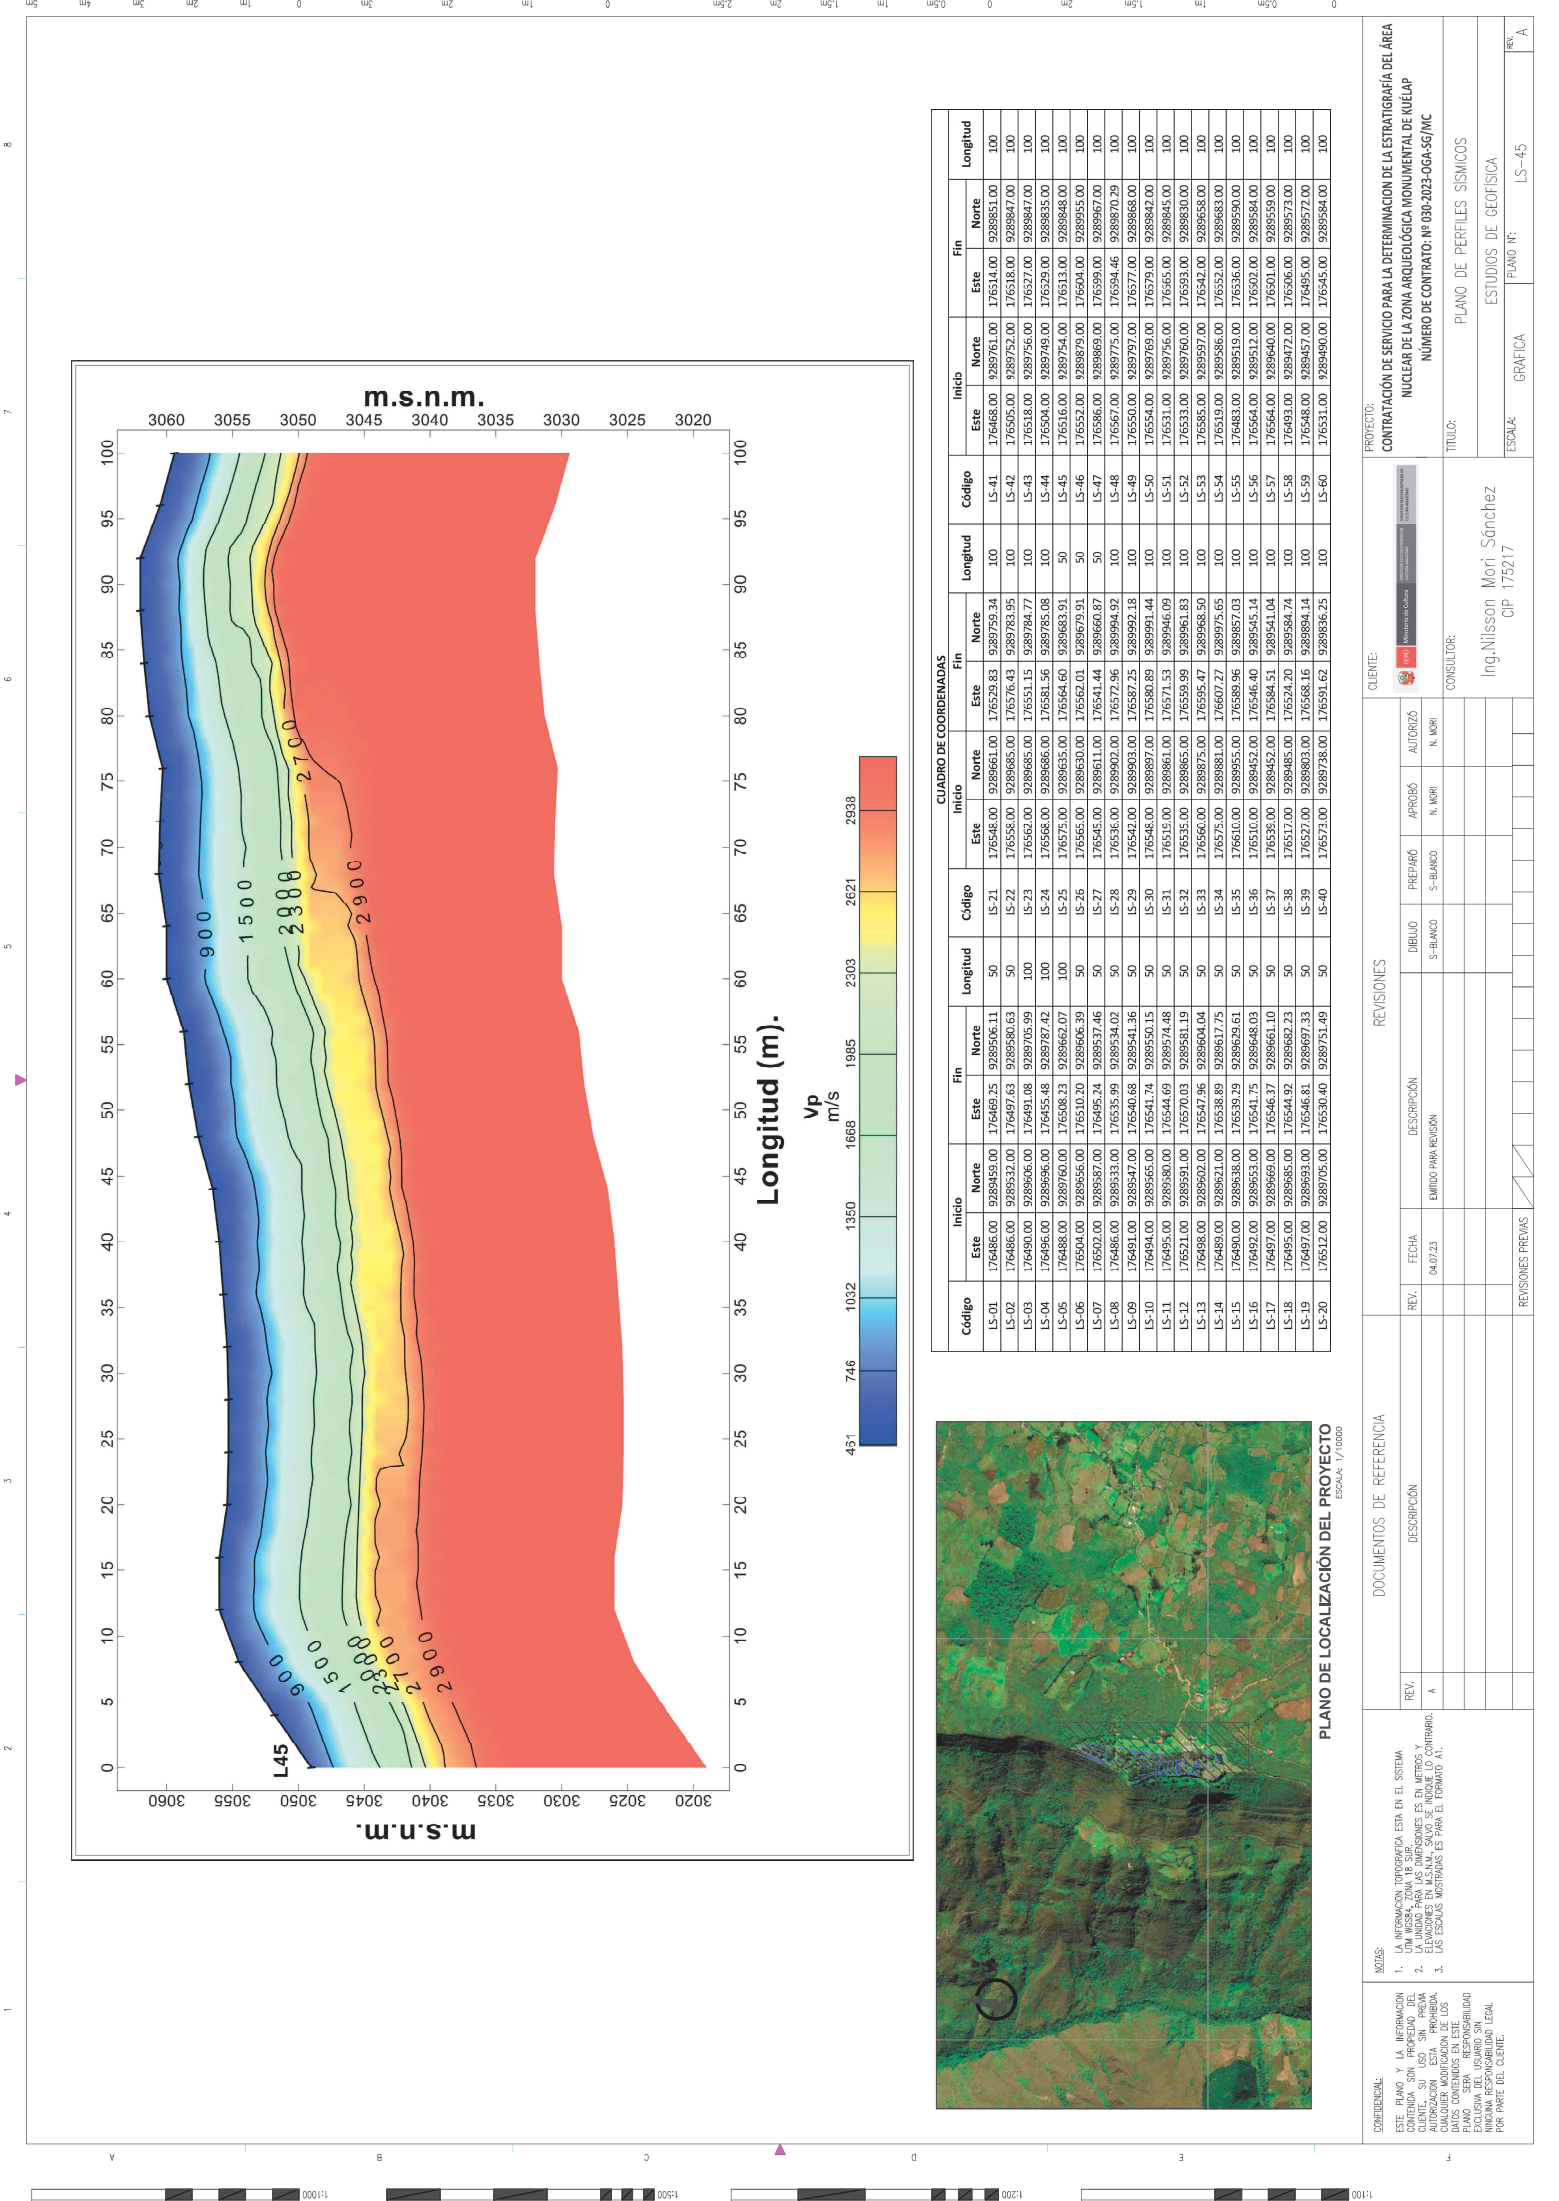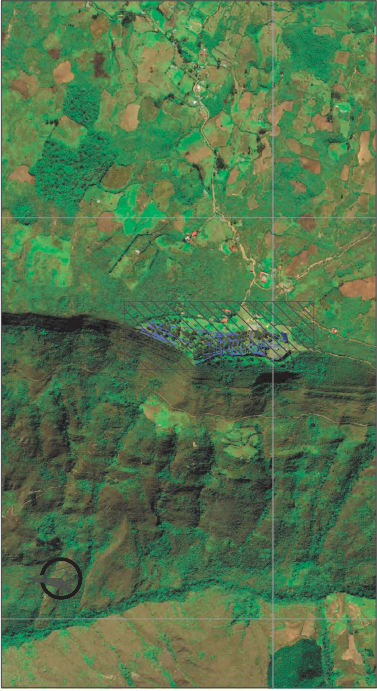

PLANO DE LOCALIZACIÓN DEL PROYECTO  
ESCALA 1/10000

| CUADRO DE COORDENADAS |             |              |           |            |        |          |           |            |        |          |           |
|-----------------------|-------------|--------------|-----------|------------|--------|----------|-----------|------------|--------|----------|-----------|
| Código                | Inicio Este | Inicio Norte | Fin Este  | Fin Norte  | Código | Longitud | Fin Este  | Fin Norte  | Código | Longitud | Fin Este  |
| LS-01                 | 176486.00   | 9289459.00   | 176469.25 | 9289506.11 | LS-21  | 50       | 176548.00 | 9289661.00 | LS-41  | 100      | 176514.00 |
| LS-02                 | 176486.00   | 9289532.00   | 176497.63 | 9289590.63 | LS-22  | 50       | 176552.00 | 9289685.00 | LS-42  | 100      | 176518.00 |
| LS-03                 | 176490.00   | 9289506.00   | 176491.08 | 9289705.99 | LS-23  | 100      | 176558.00 | 9289685.00 | LS-43  | 100      | 176518.00 |
| LS-04                 | 176496.00   | 9289596.00   | 176455.48 | 9289787.42 | LS-24  | 100      | 176568.00 | 9289686.00 | LS-44  | 100      | 176529.00 |
| LS-05                 | 176488.00   | 9289760.00   | 176508.23 | 9289662.07 | LS-25  | 100      | 176575.00 | 9289635.00 | LS-45  | 100      | 176516.00 |
| LS-06                 | 176504.00   | 9289556.00   | 176510.20 | 9289606.39 | LS-26  | 50       | 176585.00 | 9289635.00 | LS-46  | 100      | 176529.00 |
| LS-07                 | 176504.00   | 9289587.00   | 176495.24 | 9289637.46 | LS-27  | 50       | 176594.00 | 9289611.00 | LS-47  | 100      | 176529.00 |
| LS-08                 | 176486.00   | 9289533.00   | 176535.99 | 9289534.02 | LS-28  | 50       | 176596.00 | 9289502.00 | LS-48  | 100      | 176529.00 |
| LS-09                 | 176491.00   | 9289547.00   | 176540.68 | 9289541.36 | LS-29  | 50       | 176542.00 | 9289503.00 | LS-49  | 100      | 176550.00 |
| LS-10                 | 176495.00   | 9289565.00   | 176541.74 | 9289550.15 | LS-30  | 50       | 176542.00 | 9289597.00 | LS-50  | 100      | 176550.00 |
| LS-11                 | 176495.00   | 9289580.00   | 176544.69 | 9289574.48 | LS-31  | 50       | 176545.00 | 9289661.00 | LS-51  | 100      | 176531.00 |
| LS-12                 | 176521.00   | 9289591.00   | 176570.03 | 9289581.19 | LS-32  | 50       | 176553.00 | 9289665.00 | LS-52  | 100      | 176531.00 |
| LS-13                 | 176498.00   | 9289502.00   | 176547.96 | 9289604.04 | LS-33  | 50       | 176565.00 | 9289875.00 | LS-53  | 100      | 176535.00 |
| LS-14                 | 176489.00   | 9289521.00   | 176538.89 | 9289617.75 | LS-34  | 50       | 176565.00 | 9289881.00 | LS-54  | 100      | 176519.00 |
| LS-15                 | 176490.00   | 9289538.00   | 176539.29 | 9289629.61 | LS-35  | 50       | 176610.00 | 9289955.00 | LS-55  | 100      | 176519.00 |
| LS-16                 | 176492.00   | 9289553.00   | 176541.75 | 9289648.03 | LS-36  | 50       | 176610.00 | 9289955.00 | LS-56  | 100      | 176519.00 |
| LS-17                 | 176497.00   | 9289569.00   | 176546.37 | 9289661.10 | LS-37  | 50       | 176538.00 | 9289452.00 | LS-57  | 100      | 176564.00 |
| LS-18                 | 176495.00   | 9289585.00   | 176544.92 | 9289682.33 | LS-38  | 50       | 176517.00 | 9289485.00 | LS-58  | 100      | 176564.00 |
| LS-19                 | 176497.00   | 9289593.00   | 176546.81 | 9289697.33 | LS-39  | 50       | 176522.00 | 9289485.00 | LS-59  | 100      | 176564.00 |
| LS-20                 | 176512.00   | 9289705.00   | 176530.40 | 9289751.49 | LS-40  | 50       | 176572.00 | 9289738.00 | LS-60  | 100      | 176531.00 |

| DOCUMENTOS DE REFERENCIA |          |                       |          | REVISIONES |          |            |            | CLIENTE                   |  | PROYECTO                                                                                                                        |  |
|--------------------------|----------|-----------------------|----------|------------|----------|------------|------------|---------------------------|--|---------------------------------------------------------------------------------------------------------------------------------|--|
| REV.                     | FECHA    | DESCRIPCIÓN           | REVISIÓN | PREPARED   | APROBADO | AUTORIZADO | AUTORIZADO | Ing. Nilsson Mori Sánchez |  | CONTRATACIÓN DE SERVICIO PARA LA DETERMINACIÓN DE LA ESTRATIGRAFÍA DE ÁREA NUCLEAR DE LA ZONA ARQUEOLÓGICA MONUMENTAL DE KUÉLAP |  |
| A                        | 04/07/23 | EMITIDO PARA REVISIÓN |          | S-BLANCO   | N. MORI  | N. MORI    |            | CONSULTOR                 |  | NÚMERO DE CONTRATO: Nº 030-2023-OGA-SG/MC                                                                                       |  |
|                          |          |                       |          |            |          |            |            | Ing. Nilsson Mori Sánchez |  | TÍTULO:                                                                                                                         |  |
|                          |          |                       |          |            |          |            |            | CIP 175217                |  | PLANO DE PERFILES SÍSMICOS                                                                                                      |  |
|                          |          |                       |          |            |          |            |            |                           |  | ESTUDIOS DE GEOFÍSICA                                                                                                           |  |
|                          |          |                       |          |            |          |            |            |                           |  | ESCALA: GRAFICA                                                                                                                 |  |
|                          |          |                       |          |            |          |            |            |                           |  | PLANO Nº:                                                                                                                       |  |
|                          |          |                       |          |            |          |            |            |                           |  | LS-45                                                                                                                           |  |
|                          |          |                       |          |            |          |            |            |                           |  | REV.                                                                                                                            |  |
|                          |          |                       |          |            |          |            |            |                           |  | A                                                                                                                               |  |





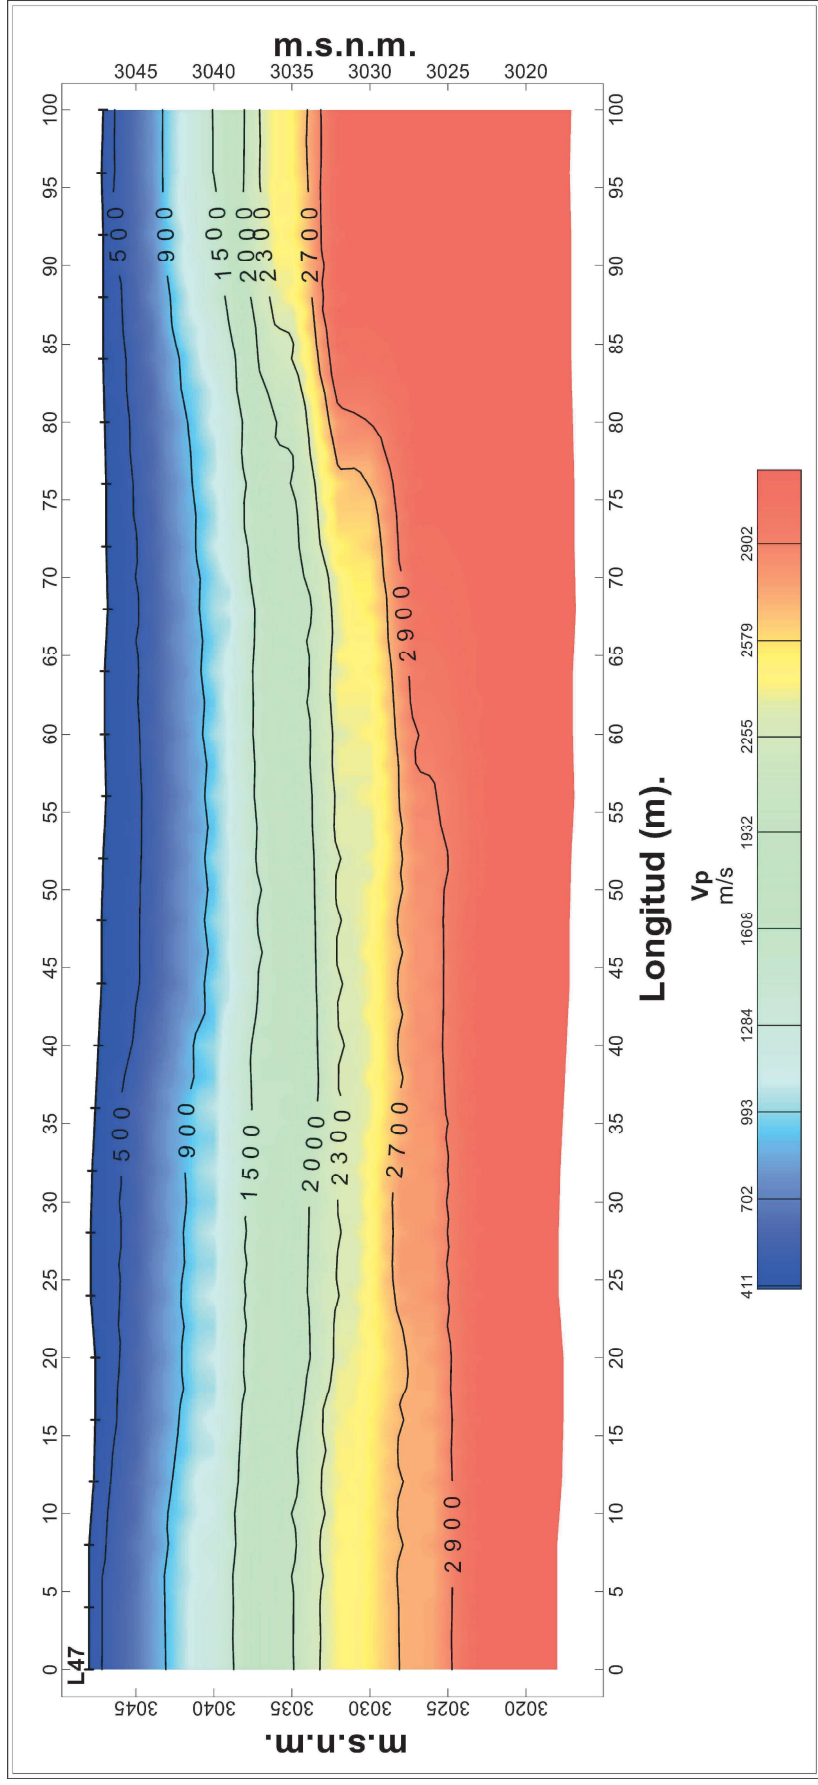

**PLANO DE LOCALIZACIÓN DEL PROYECTO**  
ESCALA: 1/10000

[illegible]





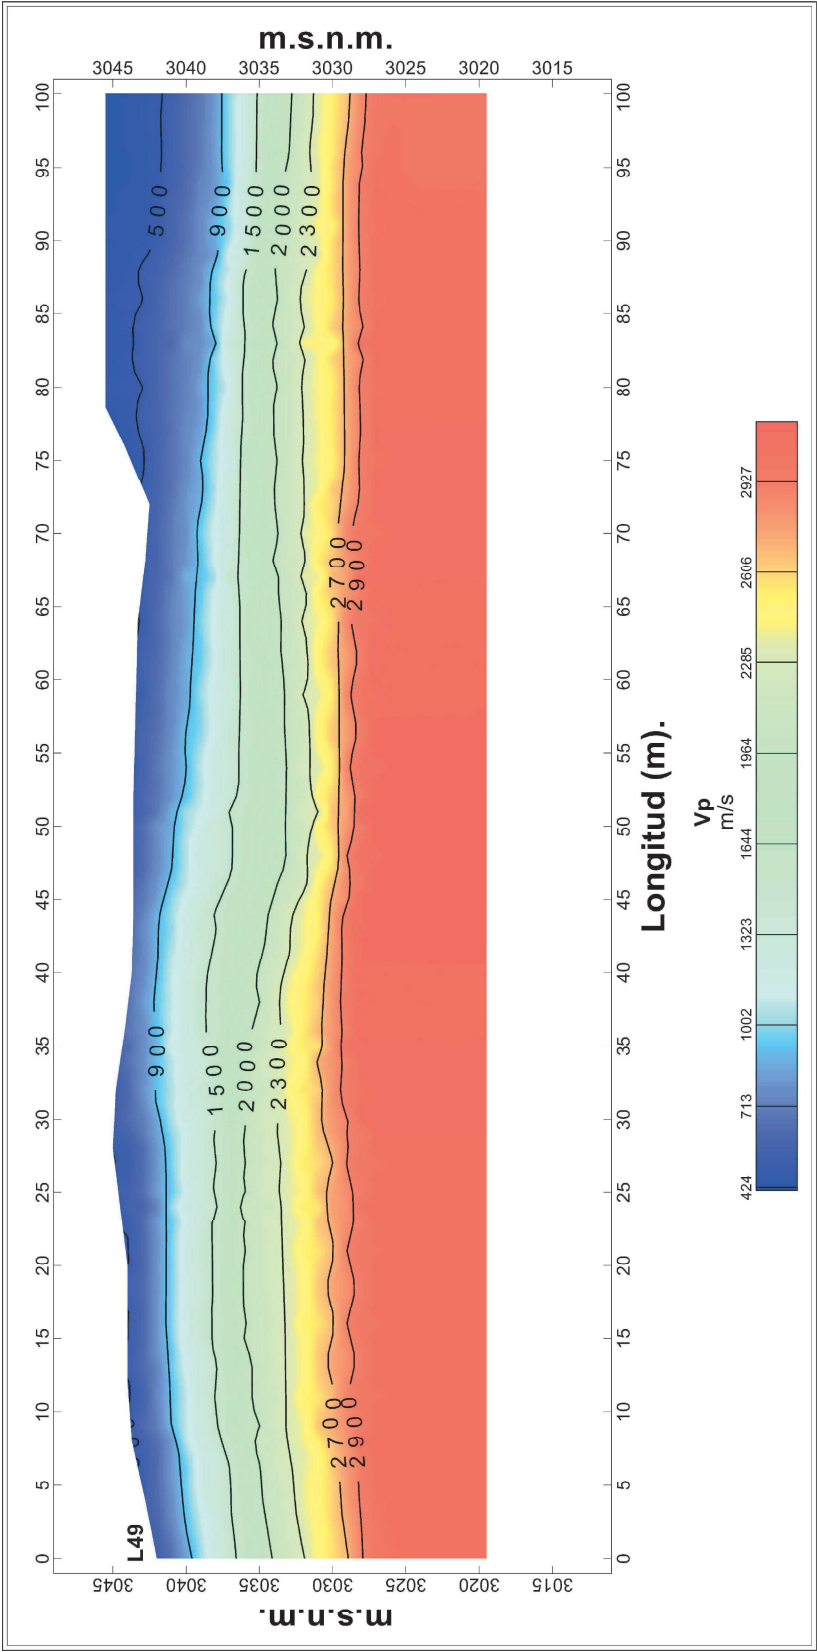

PLANO DE LOCALIZACIÓN DEL PROYECTO  
ESCALA 1/1000

CONFERENCIAL

- ESTE PLANO Y LA INFORMACIÓN CONTENIDA SON PROPIEDAD DEL CLIENTE. SU USO SIN PERMISO POR ESCRITO DE LA EMPRESA, PARA CUALQUIER MODIFICACIÓN DE LOS DATOS CONTENIDOS EN ESTE PLANO, DEBERÁ SER LA RESPONSABILIDAD DE LA EMPRESA RESPONSABLE LEGAL POR PARTE DEL CLIENTE.

NOTAS:

- LA INFORMACIÓN TOPOGRÁFICA ESTÁ EN EL SISTEMA UTM WGS84, ZONA 18 SUR.
- EL DATUM DE LA PROYECCIÓN ES EL DATUM DE MONTECARLO.
- LOS ESCALOS MOSTRADOS EN ESTE PLANO SON LOS CORRESPONDIENTES A LA ESCALA DE DISEÑO.

DOCUMENTOS DE REFERENCIA

| REV. | FECHA    | DESCRIPCIÓN           |
|------|----------|-----------------------|
| A    | 04/07/23 | EMITIDO PARA REVISIÓN |
|      |          |                       |
|      |          |                       |
|      |          |                       |

REVISIONES

| REV. | FECHA | DESCRIPCIÓN | DEBILLO  | PREPARO  | APROBÓ  | AUTORIZÓ |
|------|-------|-------------|----------|----------|---------|----------|
|      |       |             | S-BLANCO | S-BLANCO | N. MORI | N. MORI  |
|      |       |             |          |          |         |          |
|      |       |             |          |          |         |          |
|      |       |             |          |          |         |          |

CLIENTE:

Ing. Nilsson Mori Sánchez  
CIP 175217

PROYECTO:

CONTRATACIÓN DE SERVICIO PARA LA DETERMINACIÓN DE LA ESTRATIGRAFÍA DE ÁREA NUCLEAR DE LA ZONA ARQUEOLÓGICA MONUMENTAL DE KUÉLAP  
NUMERO DE CONTRATO: Nº 030-2023-OGA-SG/MC

TÍTULO:

PLANO DE PERFILES SÍSMICOS  
ESTUDIOS DE GEOFÍSICA  
ESCALA: GRAFICA PLANO Nº: LS-49  
REV. A

| CUADRO DE COORDENADAS |           |            |           |            |        |           |            |           |            |        |           |
|-----------------------|-----------|------------|-----------|------------|--------|-----------|------------|-----------|------------|--------|-----------|
| Código                | Inicio    | Este       | Norte     | Fin        | Código | Inicio    | Este       | Norte     | Fin        | Inicio | Este      |
| LS-01                 | 176486.00 | 9289459.00 | 176469.25 | 9289506.11 | LS-21  | 176546.00 | 9289661.00 | 176529.83 | 9289759.34 | LS-41  | 176514.00 |
| LS-02                 | 176486.00 | 9289532.00 | 176497.63 | 9289580.63 | LS-22  | 176552.00 | 9289685.00 | 176576.43 | 9289783.95 | LS-42  | 176505.00 |
| LS-03                 | 176490.00 | 9289506.00 | 176491.08 | 9289705.99 | LS-23  | 176558.00 | 9289685.00 | 176551.15 | 9289784.77 | LS-43  | 176518.00 |
| LS-04                 | 176496.00 | 9289596.00 | 176458.48 | 9289787.42 | LS-24  | 176566.00 | 9289686.00 | 176581.56 | 9289785.08 | LS-44  | 176504.00 |
| LS-05                 | 176488.00 | 9289760.00 | 176508.23 | 9289662.07 | LS-25  | 176575.00 | 9289635.00 | 176584.60 | 9289683.91 | LS-45  | 176516.00 |
| LS-06                 | 176504.00 | 9289556.00 | 176510.20 | 9289606.39 | LS-26  | 176585.00 | 9289630.00 | 176592.01 | 9289679.91 | LS-46  | 176522.00 |
| LS-07                 | 176502.00 | 9289587.00 | 176495.24 | 9289537.46 | LS-27  | 176594.00 | 9289611.00 | 176541.44 | 9289660.87 | LS-47  | 176526.00 |
| LS-08                 | 176486.00 | 9289531.00 | 176535.99 | 9289534.02 | LS-28  | 176596.00 | 9289602.00 | 176572.96 | 9289640.92 | LS-48  | 176527.00 |
| LS-09                 | 176491.00 | 9289547.00 | 176540.68 | 9289541.36 | LS-29  | 176542.00 | 9289503.00 | 176587.25 | 9289921.18 | LS-49  | 176550.00 |
| LS-10                 | 176495.00 | 9289565.00 | 176541.74 | 9289550.15 | LS-30  | 176542.00 | 9289597.00 | 176580.89 | 9289991.44 | LS-50  | 176554.00 |
| LS-11                 | 176495.00 | 9289580.00 | 176544.69 | 9289574.48 | LS-31  | 176551.00 | 9289861.00 | 176571.53 | 9289946.09 | LS-51  | 176531.00 |
| LS-12                 | 176521.00 | 9289591.00 | 176570.03 | 9289581.19 | LS-32  | 176555.00 | 9289865.00 | 176559.99 | 9289961.83 | LS-52  | 176533.00 |
| LS-13                 | 176498.00 | 9289502.00 | 176547.96 | 9289604.04 | LS-33  | 176560.00 | 9289875.00 | 176595.47 | 9289968.50 | LS-53  | 176585.00 |
| LS-14                 | 176489.00 | 9289521.00 | 176538.89 | 9289617.75 | LS-34  | 176565.00 | 9289881.00 | 176607.27 | 928997.65  | LS-54  | 176519.00 |
| LS-15                 | 176490.00 | 9289538.00 | 176539.29 | 9289629.61 | LS-35  | 176570.00 | 9289955.00 | 176589.96 | 9289957.03 | LS-55  | 176483.00 |
| LS-16                 | 176492.00 | 9289553.00 | 176541.75 | 9289648.03 | LS-36  | 176575.00 | 9289452.00 | 176546.40 | 9289545.14 | LS-56  | 176564.00 |
| LS-17                 | 176497.00 | 9289569.00 | 176546.37 | 9289661.10 | LS-37  | 176580.00 | 9289452.00 | 176584.51 | 9289544.04 | LS-57  | 176564.00 |
| LS-18                 | 176495.00 | 9289585.00 | 176544.92 | 9289682.33 | LS-38  | 176581.00 | 9289485.00 | 176524.20 | 9289584.74 | LS-58  | 176493.00 |
| LS-19                 | 176497.00 | 9289593.00 | 176546.81 | 9289697.33 | LS-39  | 176582.00 | 9289503.00 | 176588.16 | 9289694.14 | LS-59  | 176495.00 |
| LS-20                 | 176512.00 | 9289705.00 | 176530.40 | 9289751.49 | LS-40  | 176587.00 | 9289738.00 | 176591.62 | 9289836.25 | LS-60  | 176531.00 |



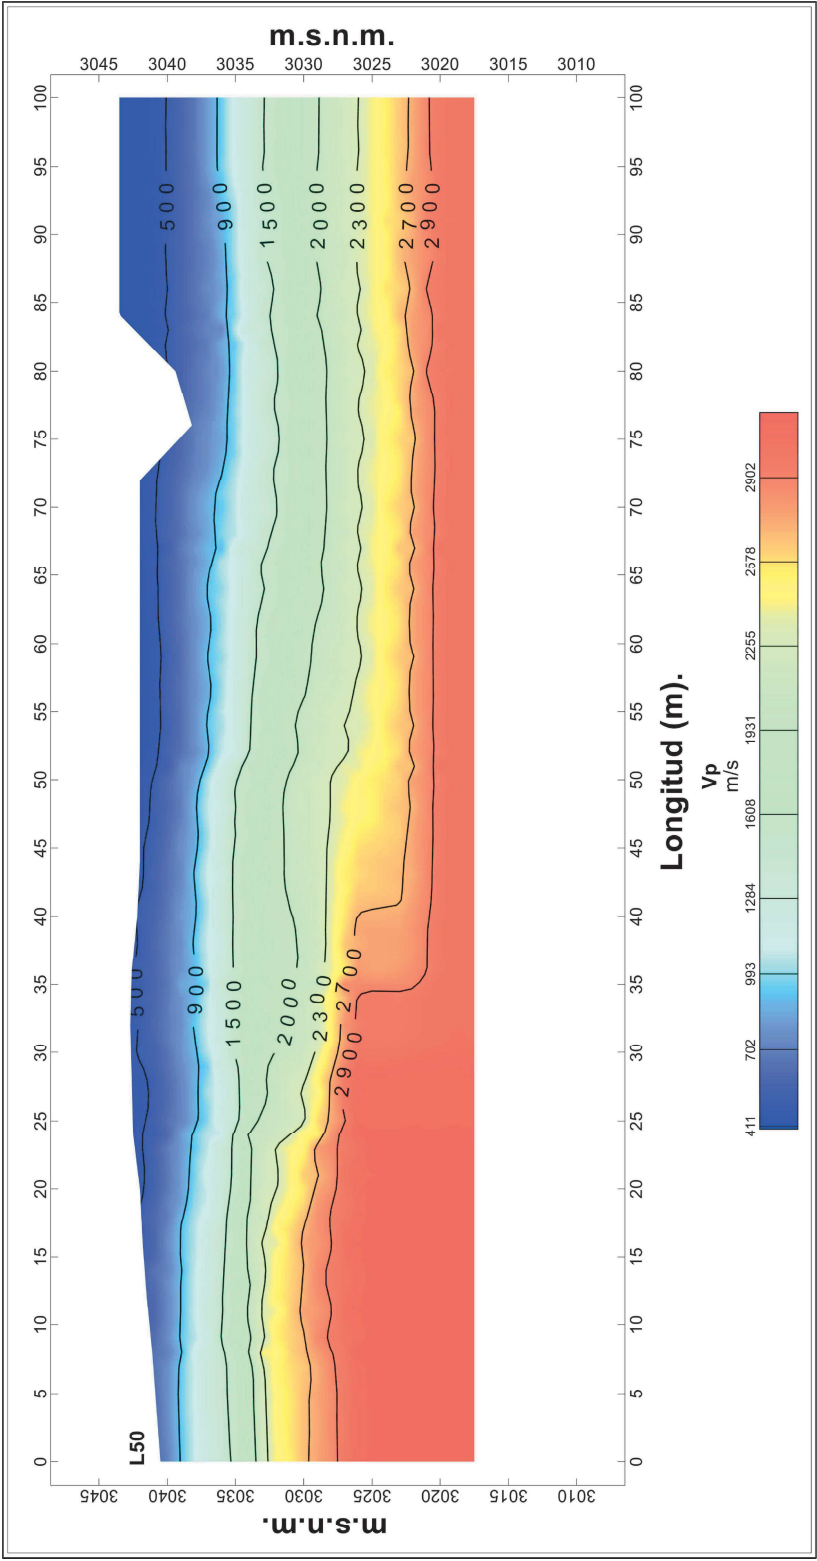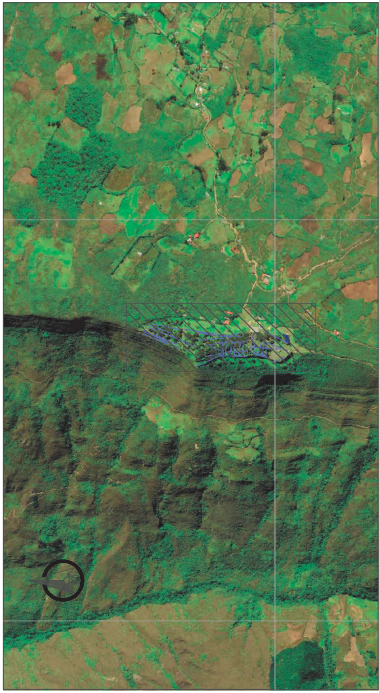

PLANO DE LOCALIZACIÓN DEL PROYECTO  
ESCALA 1/1000

NOTAS:

- LA INFORMACIÓN TOPOGRÁFICA ESTÁ EN EL SISTEMA UTM WGS84, ZONA 18 SUR.
- EL USO DEL PLANO ES SOLO PARA FINESES DE CONFIATO.
- EL PLANO NO SE DEBE USAR PARA FINESES DE CONFIATO.

ESTE PLANO Y LA INFORMACIÓN CONTENIDA SON PROPIEDAD DEL CLIENTE. SU USO SIN PERMISO POR ESCRITO DE LA EMPRESA, O LA REALIZACIÓN DE CUALQUIER MODIFICACIÓN DE LOS DATOS CONTENIDOS EN ESTE PLANO, SIN LA RESPONSABILIDAD DE LA EMPRESA, SERÁ CONSIDERADO UNA INFRACCIÓN LEGAL POR PARTE DEL CLIENTE.

DOCUMENTOS DE REFERENCIA

| REV. | FECHA    | DESCRIPCIÓN           |
|------|----------|-----------------------|
| A    | 04.07.23 | EMITIDO PARA REVISIÓN |
|      |          |                       |
|      |          |                       |
|      |          |                       |

REVISIONES

| BLUO   | PREPARO  | APROBO  | AUTORIZO |
|--------|----------|---------|----------|
| BLANCO | S-BLANCO | N. MORI | N. MORI  |
|        |          |         |          |
|        |          |         |          |
|        |          |         |          |

CLIENTE:

Ing. Nilsson Mori Sánchez  
CIP 175217

PROYECTO:

CONTRATACIÓN DE SERVICIO PARA LA DETERMINACIÓN DE LA ESTRATIGRAFÍA DE ÁREA NUCLEAR DE LA ZONA ARQUEOLÓGICA MONUMENTAL DE KUÉLAP  
NUMERO DE CONTRATO: Nº 030-2023-OGA-SG/MC

TÍTULO:

PLANO DE PERFILES SÍSMICOS  
ESTUDIOS DE GEOFÍSICA

ESCALA:

GRÁFICA PLANO Nº: LS-50

| CUADRO DE COORDENADAS |           |            |           |            |        |           |            |           |            |        |           |
|-----------------------|-----------|------------|-----------|------------|--------|-----------|------------|-----------|------------|--------|-----------|
| Código                | Inicio    | Este       | Norte     | Fin        | Código | Inicio    | Este       | Norte     | Fin        | Código | Inicio    |
| LS-01                 | 176486.00 | 9289459.00 | 176469.25 | 9289506.11 | LS-21  | 176548.00 | 9289661.00 | 176529.83 | 9289759.34 | LS-41  | 176514.00 |
| LS-02                 | 176486.00 | 9289532.00 | 176497.63 | 9289590.63 | LS-22  | 176558.00 | 9289685.00 | 176576.43 | 9289783.95 | LS-42  | 176518.00 |
| LS-03                 | 176490.00 | 9289506.00 | 176491.08 | 9289705.99 | LS-23  | 176558.00 | 9289685.00 | 176551.15 | 9289784.77 | LS-43  | 176518.00 |
| LS-04                 | 176496.00 | 9289596.00 | 176458.48 | 9289787.42 | LS-24  | 176568.00 | 9289686.00 | 176581.56 | 9289785.08 | LS-44  | 176529.00 |
| LS-05                 | 176488.00 | 9289760.00 | 176508.23 | 9289662.07 | LS-25  | 176575.00 | 9289635.00 | 176584.60 | 9289683.91 | LS-45  | 176516.00 |
| LS-06                 | 176504.00 | 9289556.00 | 176510.20 | 9289606.39 | LS-26  | 176575.00 | 9289635.00 | 176584.60 | 9289683.91 | LS-46  | 176529.00 |
| LS-07                 | 176504.00 | 9289587.00 | 176495.24 | 9289537.46 | LS-27  | 176584.00 | 9289611.00 | 176541.44 | 9289670.91 | LS-47  | 176529.00 |
| LS-08                 | 176486.00 | 9289531.00 | 176535.99 | 9289534.02 | LS-28  | 176584.00 | 9289611.00 | 176541.44 | 9289670.91 | LS-48  | 176529.00 |
| LS-09                 | 176491.00 | 9289547.00 | 176540.68 | 9289541.36 | LS-29  | 176584.00 | 9289611.00 | 176541.44 | 9289670.91 | LS-49  | 176529.00 |
| LS-10                 | 176494.00 | 9289565.00 | 176541.74 | 9289550.15 | LS-30  | 176584.00 | 9289611.00 | 176541.44 | 9289670.91 | LS-50  | 176529.00 |
| LS-11                 | 176495.00 | 9289580.00 | 176544.69 | 9289574.48 | LS-31  | 176584.00 | 9289611.00 | 176541.44 | 9289670.91 | LS-51  | 176529.00 |
| LS-12                 | 176521.00 | 9289591.00 | 176570.03 | 9289581.19 | LS-32  | 176584.00 | 9289611.00 | 176541.44 | 9289670.91 | LS-52  | 176529.00 |
| LS-13                 | 176498.00 | 9289502.00 | 176547.96 | 9289604.04 | LS-33  | 176584.00 | 9289611.00 | 176541.44 | 9289670.91 | LS-53  | 176529.00 |
| LS-14                 | 176489.00 | 9289521.00 | 176538.89 | 9289617.75 | LS-34  | 176584.00 | 9289611.00 | 176541.44 | 9289670.91 | LS-54  | 176529.00 |
| LS-15                 | 176490.00 | 9289538.00 | 176539.29 | 9289629.61 | LS-35  | 176584.00 | 9289611.00 | 176541.44 | 9289670.91 | LS-55  | 176529.00 |
| LS-16                 | 176492.00 | 9289553.00 | 176541.75 | 9289648.03 | LS-36  | 176584.00 | 9289611.00 | 176541.44 | 9289670.91 | LS-56  | 176529.00 |
| LS-17                 | 176497.00 | 9289569.00 | 176546.37 | 9289661.10 | LS-37  | 176584.00 | 9289611.00 | 176541.44 | 9289670.91 | LS-57  | 176529.00 |
| LS-18                 | 176495.00 | 9289585.00 | 176544.92 | 9289682.33 | LS-38  | 176584.00 | 9289611.00 | 176541.44 | 9289670.91 | LS-58  | 176529.00 |
| LS-19                 | 176497.00 | 9289593.00 | 176546.81 | 9289697.33 | LS-39  | 176584.00 | 9289611.00 | 176541.44 | 9289670.91 | LS-59  | 176529.00 |
| LS-20                 | 176512.00 | 9289705.00 | 176530.40 | 9289751.49 | LS-40  | 176584.00 | 9289611.00 | 176541.44 | 9289670.91 | LS-60  | 176529.00 |



1 2 3 4 5 6 7 8

A B C D E F

0 50m 100m 150m 200m 250m 300m 350m 400m 450m 500m 550m 600m 650m 700m 750m 800m 850m 900m 950m 1000m

0 50m 100m 150m 200m 250m 300m 350m 400m 450m 500m 550m 600m 650m 700m 750m 800m 850m 900m 950m 1000m

0 50m 100m 150m 200m 250m 300m 350m 400m 450m 500m 550m 600m 650m 700m 750m 800m 850m 900m 950m 1000m

0 50m 100m 150m 200m 250m 300m 350m 400m 450m 500m 550m 600m 650m 700m 750m 800m 850m 900m 950m 1000m

0 50m 100m 150m 200m 250m 300m 350m 400m 450m 500m 550m 600m 650m 700m 750m 800m 850m 900m 950m 1000m

0 50m 100m 150m 200m 250m 300m 350m 400m 450m 500m 550m 600m 650m 700m 750m 800m 850m 900m 950m 1000m

0 50m 100m 150m 200m 250m 300m 350m 400m 450m 500m 550m 600m 650m 700m 750m 800m 850m 900m 950m 1000m

0 50m 100m 150m 200m 250m 300m 350m 400m 450m 500m 550m 600m 650m 700m 750m 800m 850m 900m 950m 1000m

0 50m 100m 150m 200m 250m 300m 350m 400m 450m 500m 550m 600m 650m 700m 750m 800m 850m 900m 950m 1000m

0 50m 100m 150m 200m 250m 300m 350m 400m 450m 500m 550m 600m 650m 700m 750m 800m 850m 900m 950m 1000m

0 50m 100m 150m 200m 250m 300m 350m 400m 450m 500m 550m 600m 650m 700m 750m 800m 850m 900m 950m 1000m

0 50m 100m 150m 200m 250m 300m 350m 400m 450m 500m 550m 600m 650m 700m 750m 800m 850m 900m 950m 1000m

0 50m 100m 150m 200m 250m 300m 350m 400m 450m 500m 550m 600m 650m 700m 750m 800m 850m 900m 950m 1000m

0 50m 100m 150m 200m 250m 300m 350m 400m 450m 500m 550m 600m 650m 700m 750m 800m 850m 900m 950m 1000m

0 50m 100m 150m 200m 250m 300m 350m 400m 450m 500m 550m 600m 650m 700m 750m 800m 850m 900m 950m 1000m

0 50m 100m 150m 200m 250m 300m 350m 400m 450m 500m 550m 600m 650m 700m 750m 800m 850m 900m 950m 1000m

0 50m 100m 150m 200m 250m 300m 350m 400m 450m 500m 550m 600m 650m 700m 750m 800m 850m 900m 950m 1000m

0 50m 100m 150m 200m 250m 300m 350m 400m 450m 500m 550m 600m 650m 700m 750m 800m 850m 900m 950m 1000m

0 50m 100m 150m 200m 250m 300m 350m 400m 450m 500m 550m 600m 650m 700m 750m 800m 850m 900m 950m 1000m

0 50m 100m 150m 200m 250m 300m 350m 400m 450m 500m 550m 600m 650m 700m 750m 800m 850m 900m 950m 1000m

0 50m 100m 150m 200m 250m 300m 350m 400m 450m 500m 550m 600m 650m 700m 750m 800m 850m 900m 950m 1000m

0 50m 100m 150m 200m 250m 300m 350m 400m 450m 500m 550m 600m 650m 700m 750m 800m 850m 900m 950m 1000m

0 50m 100m 150m 200m 250m 300m 350m 400m 450m 500m 550m 600m 650m 700m 750m 800m 850m 900m 950m 1000m

0 50m 100m 150m 200m 250m 300m 350m 400m 450m 500m 550m 600m 650m 700m 750m 800m 850m 900m 950m 1000m

0 50m 100m 150m 200m 250m 300m 350m 400m 450m 500m 550m 600m 650m 700m 750m 800m 850m 900m 950m 1000m

0 50m 100m 150m 200m 250m 300m 350m 400m 450m 500m 550m 600m 650m 700m 750m 800m 850m 900m 950m 1000m

0 50m 100m 150m 200m 250m 300m 350m 400m 450m 500m 550m 600m 650m 700m 750m 800m 850m 900m 950m 1000m

0 50m 100m 150m 200m 250m 300m 350m 400m 450m 500m 550m 600m 650m 700m 750m 800m 850m 900m 950m 1000m

0 50m 100m 150m 200m 250m 300m 350m 400m 450m 500m 550m 600m 650m 700m 750m 800m 850m 900m 950m 1000m

0 50m 100m 150m 200m 250m 300m 350m 400m 450m 500m 550m 600m 650m 700m 750m 800m 850m 900m 950m 1000m

0 50m 100m 150m 200m 250m 300m 350m 400m 450m 500m 550m 600m 650m 700m 750m 800m 850m 900m 950m 1000m

0 50m 100m 150m 200m 250m 300m 350m 400m 450m 500m 550m 600m 650m 700m 750m 800m 850m 900m 950m 1000m

0 50m 100m 150m 200m 250m 300m 350m 400m 450m 500m 550m 600m 650m 700m 750m 800m 850m 900m 950m 1000m

0 50m 100m 150m 200m 250m 300m 350m 400m 450m 500m 550m 600m 650m 700m 750m 800m 850m 900m 950m 1000m

0 50m 100m 150m 200m 250m 300m 350m 400m 450m 500m 550m 600m 650m 700m 750m 800m 850m 900m 950m 1000m

0 50m 100m 150m 200m 250m 300m 350m 400m 450m 500m 550m 600m 650m 700m 750m 800m 850m 900m 950m 1000m

0 50m 100m 150m 200m 250m 300m 350m 400m 450m 500m 550m 600m 650m 700m 750m 800m 850m 900m 950m 1000m

0 50m 100m 150m 200m 250m 300m 350m 400m 450m 500m 550m 600m 650m 700m 750m 800m 850m 900m 950m 1000m

0 50m 100m 150m 200m 250m 300m 350m 400m 450m 500m 550m 600m 650m 700m 750m 800m 850m 900m 950m 1000m

0 50m 100m 150m 200m 250m 300m 350m 400m 450m 500m 550m 600m 650m 700m 750m 800m 850m 900m 950m 1000m

0 50m 100m 150m 200m 250m 300m 350m 400m 450m 500m 550m 600m 650m 700m 750m 800m 850m 900m 950m 1000m

0 50m 100m 150m 200m 250m 300m 350m 400m 450m 500m 550m 600m 650m 700m 750m 800m 850m 900m 950m 1000m

0 50m 100m 150m 200m 250m 300m 350m 400m 450m 500m 550m 600m 650m 700m 750m 800m 850m 900m 950m 1000m

0 50m 100m 150m 200m 250m 300m 350m 400m 450m 500m 550m 600m 650m 700m 750m 800m 850m 900m 950m 1000m

0 50m 100m 150m 200m 250m 300m 350m 400m 450m 500m 550m 600m 650m 700m 750m 800m 850m 900m 950m 1000m

0 50m 100m 150m 200m 250m 300m 350m 400m 450m 500m 550m 600m 650m 700m 750m 800m 850m 900m 950m 1000m

0 50m 100m 150m 200m 250m 300m 350m 400m 450m 500m 550m 600m 650m 700m 750m 800m 850m 900m 950m 1000m

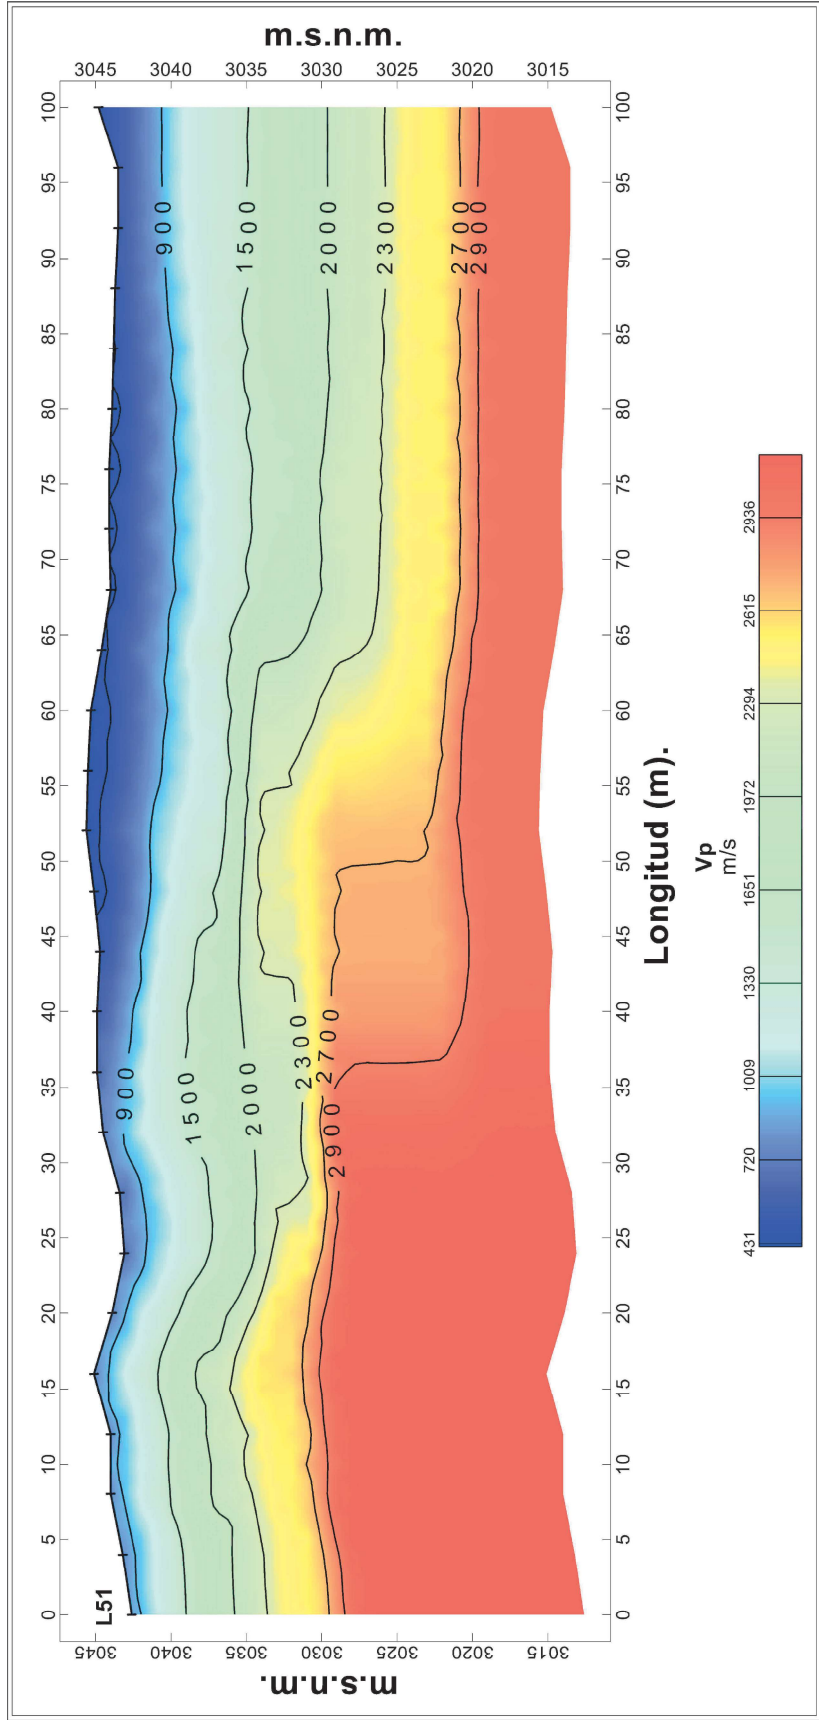

PLANO DE LOCALIZACIÓN DEL PROYECTO  
ESCALA 1/1000

| CUADRO DE COORDENADAS |           |            |           |            |        |           |            |           |            |        |           |
|-----------------------|-----------|------------|-----------|------------|--------|-----------|------------|-----------|------------|--------|-----------|
| Código                | Inicio    | Este       | Norte     | Fin        | Código | Inicio    | Este       | Norte     | Fin        | Código | Inicio    |
| LS-01                 | 176486.00 | 9289459.00 | 176469.25 | 9289506.11 | LS-21  | 176548.00 | 9289661.00 | 176529.83 | 9289759.34 | LS-41  | 176514.00 |
| LS-02                 | 176486.00 | 9289532.00 | 176497.63 | 9289580.63 | LS-22  | 176558.00 | 9289685.00 | 176576.43 | 9289783.95 | LS-42  | 176505.00 |
| LS-03                 | 176490.00 | 9289506.00 | 176491.08 | 9289705.99 | LS-23  | 176562.00 | 9289685.00 | 176551.15 | 9289784.77 | LS-43  | 176518.00 |
| LS-04                 | 176496.00 | 9289596.00 | 176455.48 | 9289787.42 | LS-24  | 176566.00 | 9289686.00 | 176581.56 | 9289785.08 | LS-44  | 176504.00 |
| LS-05                 | 176488.00 | 9289760.00 | 176508.23 | 9289662.07 | LS-25  | 176575.00 | 9289635.00 | 176564.60 | 9289683.91 | LS-45  | 176516.00 |
| LS-06                 | 176504.00 | 9289556.00 | 176510.20 | 9289606.39 | LS-26  | 176585.00 | 9289630.00 | 176562.01 | 9289679.91 | LS-46  | 176552.00 |
| LS-07                 | 176502.00 | 9289587.00 | 176495.24 | 9289637.46 | LS-27  | 176594.00 | 9289611.00 | 176541.44 | 9289660.87 | LS-47  | 176586.00 |
| LS-08                 | 176486.00 | 9289533.00 | 176535.99 | 9289534.02 | LS-28  | 176596.00 | 9289602.00 | 176572.96 | 9289994.92 | LS-48  | 176567.00 |
| LS-09                 | 176491.00 | 9289547.00 | 176540.68 | 9289541.36 | LS-29  | 176542.00 | 9289903.00 | 176587.25 | 9289921.18 | LS-49  | 176550.00 |
| LS-10                 | 176494.00 | 9289565.00 | 176541.74 | 9289550.15 | LS-30  | 176542.00 | 9289907.00 | 176580.89 | 9289921.18 | LS-50  | 176554.00 |
| LS-11                 | 176495.00 | 9289580.00 | 176544.69 | 9289574.48 | LS-31  | 176551.00 | 9289861.00 | 176571.53 | 9289946.09 | LS-51  | 176531.00 |
| LS-12                 | 176521.00 | 9289591.00 | 176570.03 | 9289581.19 | LS-32  | 176555.00 | 9289865.00 | 176559.99 | 9289961.83 | LS-52  | 176533.00 |
| LS-13                 | 176498.00 | 9289502.00 | 176547.96 | 9289604.04 | LS-33  | 176566.00 | 9289875.00 | 176595.47 | 9289968.50 | LS-53  | 176585.00 |
| LS-14                 | 176489.00 | 9289521.00 | 176538.89 | 9289617.75 | LS-34  | 176575.00 | 9289881.00 | 176597.65 | 9289975.65 | LS-54  | 176519.00 |
| LS-15                 | 176490.00 | 9289538.00 | 176539.29 | 9289629.61 | LS-35  | 176610.00 | 9289955.00 | 176589.96 | 9289957.03 | LS-55  | 176519.00 |
| LS-16                 | 176492.00 | 9289553.00 | 176541.75 | 9289648.03 | LS-36  | 176610.00 | 9289955.00 | 176589.96 | 9289957.03 | LS-56  | 176519.00 |
| LS-17                 | 176497.00 | 9289569.00 | 176546.37 | 9289661.10 | LS-37  | 176610.00 | 9289955.00 | 176589.96 | 9289957.03 | LS-57  | 176519.00 |
| LS-18                 | 176495.00 | 9289585.00 | 176544.92 | 9289682.33 | LS-38  | 176610.00 | 9289955.00 | 176589.96 | 9289957.03 | LS-58  | 176519.00 |
| LS-19                 | 176497.00 | 9289593.00 | 176546.81 | 9289697.33 | LS-39  | 176610.00 | 9289955.00 | 176589.96 | 9289957.03 | LS-59  | 176519.00 |
| LS-20                 | 176512.00 | 9289705.00 | 176530.40 | 9289751.49 | LS-40  | 176512.00 | 9289705.00 | 176530.40 | 9289751.49 | LS-60  | 176531.00 |

CONFIDENCIAL

NOTAS:  
1. LA INFORMACIÓN TOPOGRAFICA ESTA EN EL SISTEMA UTM WGS84, ZONA 18 SUR.  
2. EL USO DEL PLAN DE PRESENTACIÓN DE LOS DATOS DEBEN SER EN UN FORMATO A1.  
3. LAS ESCALAS MOSTRADAS SON PARA EL FORMATO A1.

DOCUMENTOS DE REFERENCIA

REV. DESCRIPCIÓN

PLANO DE LOCALIZACIÓN DEL PROYECTO

ESCALA 1/1000

REVISIONES

CLIENTE:

PROYECTO:

CONTRATACIÓN DE SERVICIO PARA LA DETERMINACIÓN DE LA ESTRATIGRAFÍA DE ÁREA NUCLEAR DE LA ZONA ARQUEOLÓGICA MONUMENTAL DE KUÉLAP

NUMERO DE CONTRATO: Nº 030-2023-OGA-SG/MC

TÍTULO:

PLANO DE PERFILES SÍSMICOS

ESTUDIOS DE GEOFÍSICA

ESCALA:

GRÁFICA

PLANO Nº:

LS-51

REV. A







ESCALA: 1/10000

[illegible]



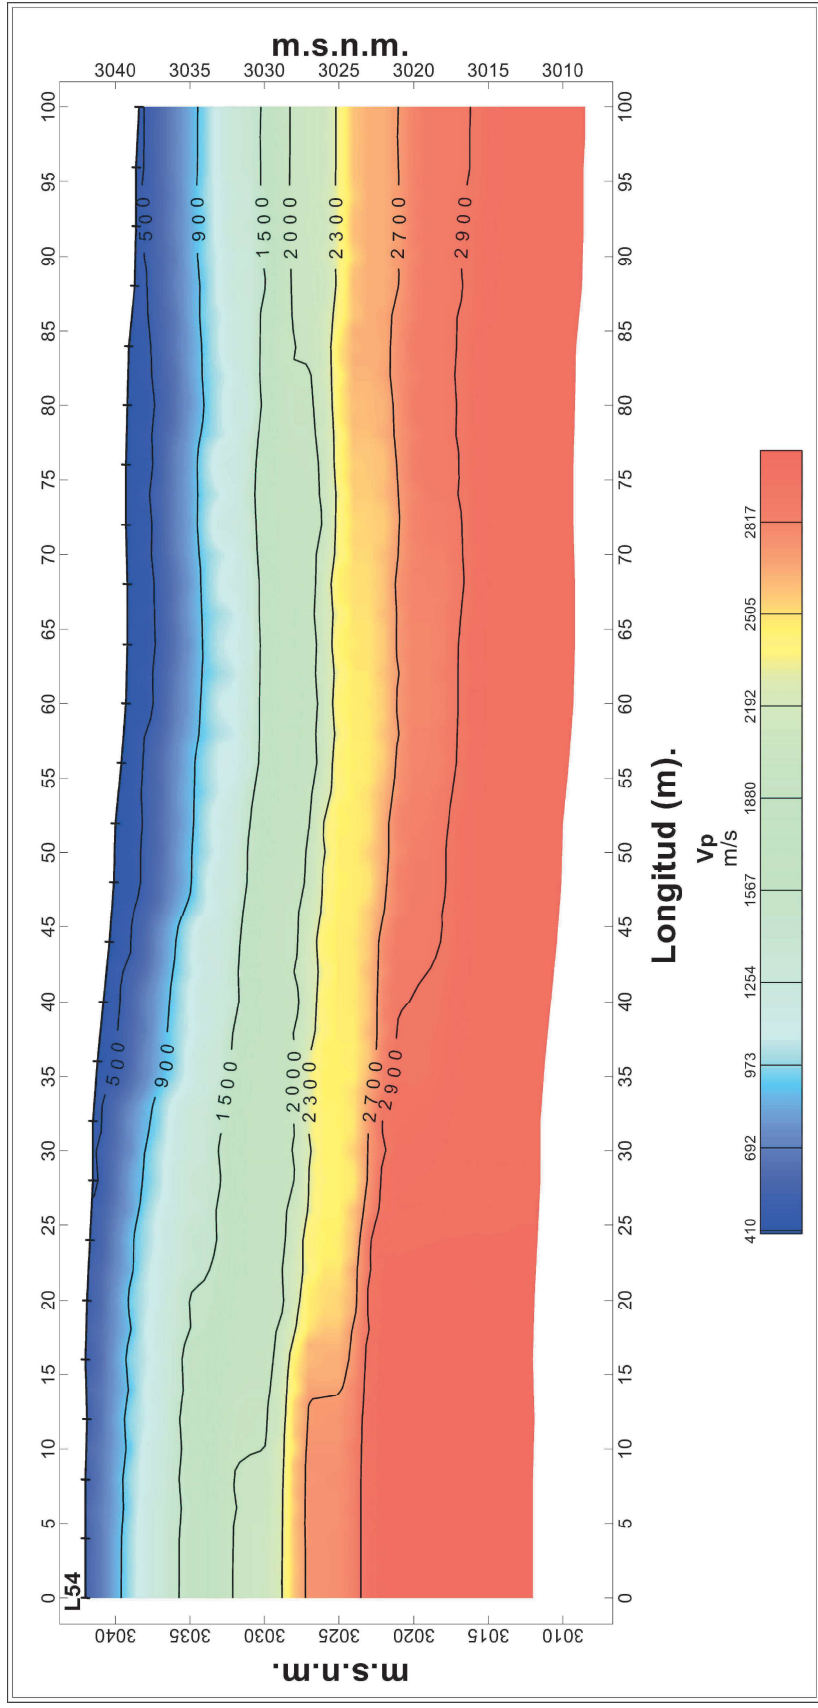

PLANO DE LOCALIZACIÓN DEL PROYECTO

| CUADRO DE COORDENADAS |         |         |         |            |        |        |         |         |          |            |      |       |         |            |         |            |     |
|-----------------------|---------|---------|---------|------------|--------|--------|---------|---------|----------|------------|------|-------|---------|------------|---------|------------|-----|
| Código                | Inicio  |         |         | Longitud   | Código | Inicio |         |         | Longitud | Código     | Fin  |       |         | Longitud   |         |            |     |
|                       | Este    | Norte   | Este    |            |        | Norte  | Este    | Norte   |          |            | Este | Norte |         |            |         |            |     |
| LS-01                 | 1764800 | 9289450 | 1764693 | 9289506.11 | 50     | LS-21  | 1765430 | 9289861 | 1765293  | 9289783    | 100  | LS-41 | 1764685 | 9289761.00 | 1765140 | 9289851.00 | 100 |
| LS-02                 | 1764800 | 9289532 | 1764697 | 9289506.63 | 50     | LS-22  | 1765530 | 9289865 | 1765676  | 9289783.95 | 100  | LS-42 | 1765035 | 9289752.00 | 1765180 | 9289847.00 | 100 |
| LS-03                 | 1764900 | 9289606 | 1764901 | 9289707.42 | 100    | LS-23  | 1765650 | 9289868 | 1765811  | 9289784.77 | 100  | LS-43 | 1765180 | 9289756.00 | 1765270 | 9289847.00 | 100 |
| LS-04                 | 1764900 | 9289606 | 1764905 | 9289787.42 | 100    | LS-24  | 1765660 | 9289866 | 1765851  | 9289785.00 | 100  | LS-44 | 1765034 | 9289754.00 | 1765270 | 9289847.00 | 100 |
| LS-05                 | 1764800 | 9289760 | 1765083 | 9289666.37 | 100    | LS-25  | 1765705 | 9289863 | 1765640  | 9289683.91 | 50   | LS-45 | 1765166 | 9289754.00 | 1765130 | 9289848.00 | 100 |
| LS-06                 | 1765000 | 9289856 | 1765120 | 9289866.09 | 100    | LS-26  | 1765650 | 9289830 | 1765652  | 9289697.91 | 50   | LS-46 | 1765552 | 9289870.00 | 1765000 | 9289855.00 | 100 |
| LS-07                 | 1765000 | 9289857 | 1764905 | 9289537.46 | 50     | LS-27  | 1765450 | 9289811 | 1765441  | 9289660.87 | 100  | LS-47 | 1765656 | 9289860.00 | 1765000 | 9289867.00 | 100 |
| LS-08                 | 1764800 | 9289533 | 1765399 | 9289534.06 | 50     | LS-28  | 1765360 | 9289802 | 1765372  | 9289994.92 | 100  | LS-48 | 1765657 | 9289775.00 | 1765946 | 9289879.00 | 100 |
| LS-09                 | 1764900 | 9289547 | 1765416 | 9289541.36 | 50     | LS-29  | 1765420 | 9289803 | 1765875  | 9289992.14 | 100  | LS-49 | 1765500 | 9289797.00 | 1765700 | 9289868.00 | 100 |
| LS-10                 | 1764900 | 9289565 | 1765417 | 9289550.14 | 50     | LS-30  | 1765480 | 9289897 | 1765801  | 9289991.44 | 100  | LS-50 | 1765504 | 9289760.00 | 1765700 | 9289868.00 | 100 |
| LS-11                 | 1764900 | 9289580 | 1765440 | 9289574.88 | 50     | LS-31  | 1765100 | 9289861 | 1765713  | 9289946.09 | 100  | LS-51 | 1765301 | 9289766.00 | 1765650 | 9289845.00 | 100 |
| LS-12                 | 1765210 | 9289590 | 1765703 | 9289583.19 | 50     | LS-32  | 1765300 | 9289865 | 1765599  | 9289964.83 | 100  | LS-52 | 1765330 | 9289760.00 | 1765930 | 9289830.00 | 100 |
| LS-13                 | 1764900 | 9289602 | 1765387 | 9289604.04 | 100    | LS-33  | 1765600 | 9289875 | 1765959  | 9289968.50 | 100  | LS-53 | 1765805 | 9289597.00 | 1765402 | 9289638.00 | 100 |
| LS-14                 | 1764900 | 9289621 | 1765388 | 9289617.75 | 50     | LS-34  | 1765700 | 9289881 | 1766027  | 9289976.65 | 100  | LS-54 | 1765100 | 9289886.00 | 1765202 | 9289863.00 | 100 |
| LS-15                 | 1764900 | 9289638 | 1765399 | 9289629.61 | 50     | LS-35  | 1765100 | 9289895 | 1765389  | 9289857.03 | 100  | LS-55 | 1764803 | 9289519.00 | 1765306 | 9289590.00 | 100 |
| LS-16                 | 1764900 | 9289650 | 1765399 | 9289648.03 | 50     | LS-36  | 1765100 | 9289852 | 1765640  | 9289545.14 | 100  | LS-56 | 1765604 | 9289512.00 | 1765002 | 9289584.00 | 100 |
| LS-17                 | 1764900 | 9289669 | 1765463 | 9289661.10 | 50     | LS-37  | 1765300 | 9289845 | 1765841  | 9289574.04 | 100  | LS-57 | 1765604 | 9289640.00 | 1765006 | 9289559.00 | 100 |
| LS-18                 | 1764900 | 9289695 | 1765442 | 9289692.23 | 50     | LS-38  | 1765100 | 9289840 | 1765274  | 9289598.74 | 100  | LS-58 | 1764903 | 9289472.00 | 1765006 | 9289573.00 | 100 |
| LS-19                 | 1765000 | 9289703 | 1765466 | 9289697.33 | 50     | LS-39  | 1765200 | 9289803 | 1765681  | 9289896.24 | 100  | LS-59 | 1765400 | 9289495.00 | 1765005 | 9289572.00 | 100 |
| LS-20                 | 1765100 | 9289705 | 1765340 | 9289751.49 | 100    | LS-40  | 1765300 | 9289807 | 1765916  | 9289886.75 | 100  | LS-60 | 1765301 | 9289490.00 | 1765005 | 9289584.00 | 100 |

[illegible]







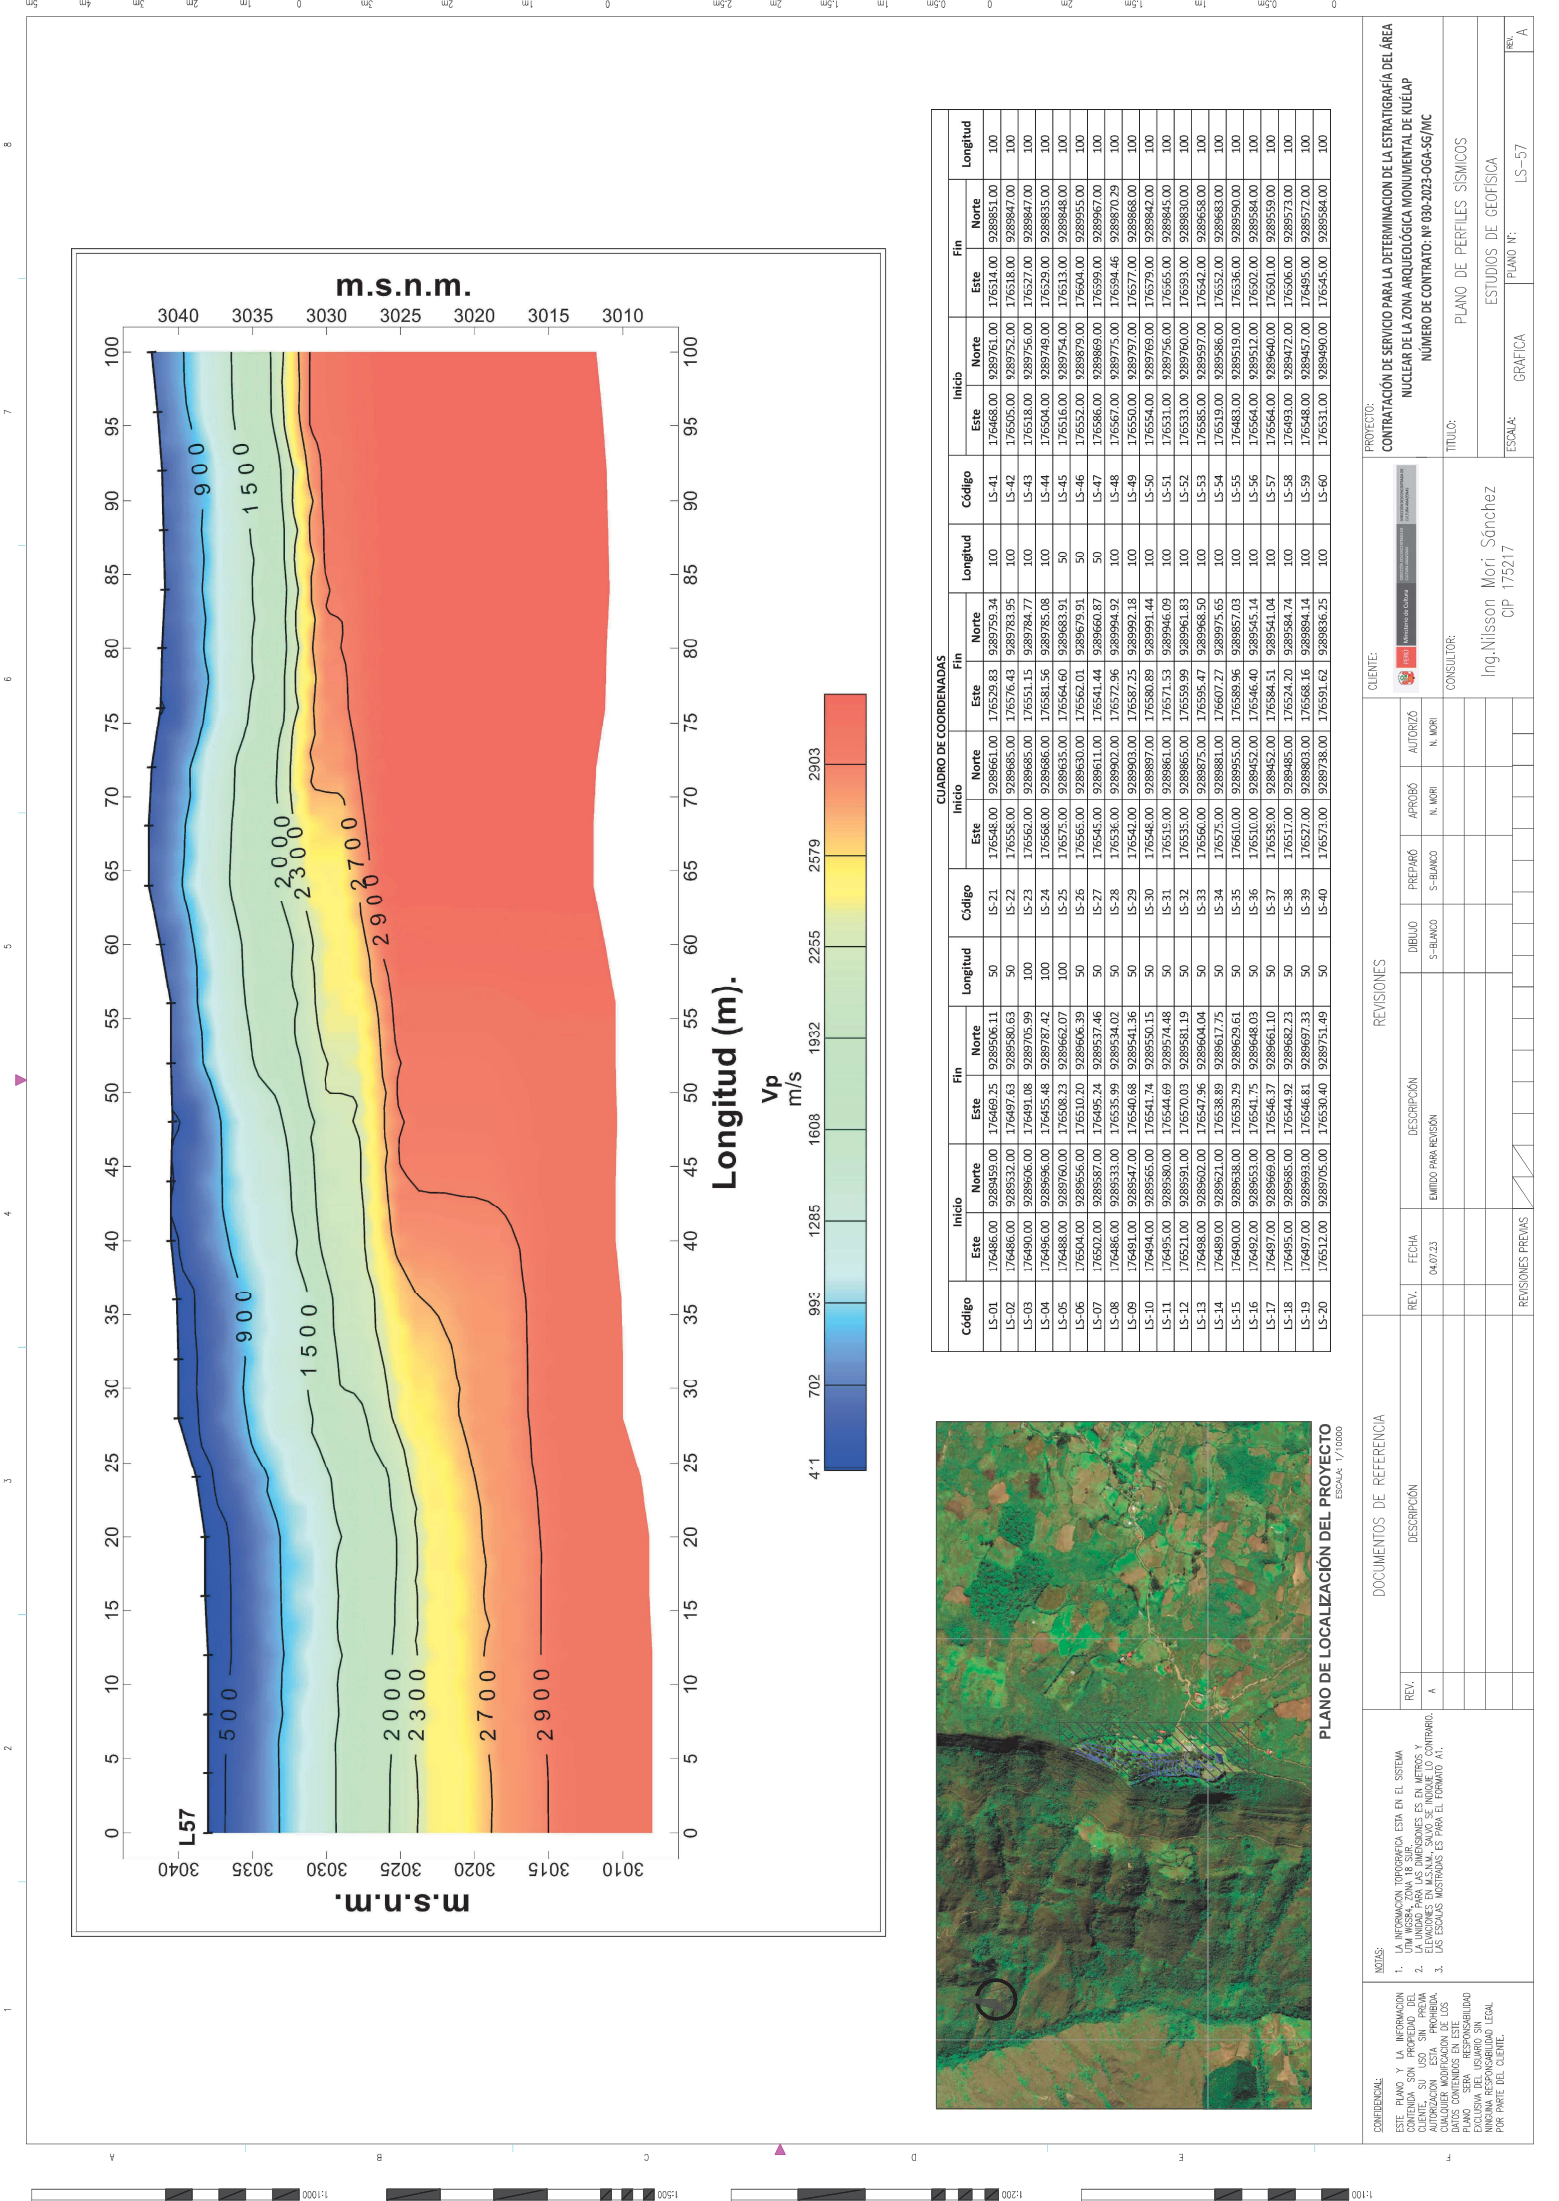

| CONFERENCIAL                                                                                                                                                                                                              |      | DOCUMENTOS DE REFERENCIA                             |          | REVISIONES                                            |             | CLIENTE                                                        |          | PROYECTO                        |          |
|---------------------------------------------------------------------------------------------------------------------------------------------------------------------------------------------------------------------------|------|------------------------------------------------------|----------|-------------------------------------------------------|-------------|----------------------------------------------------------------|----------|---------------------------------|----------|
| NOTAS:<br>1. LA INFORMACION TOPOGRAFICA ESTA EN EL SISTEMA UTM NISPA, ZONA 18 SUR.<br>2. LAS COORDENADAS SON EN METROS.<br>3. LAS ESCALAS MOSTRAN ES PARA EL FORMATO A1.                                                  | REV. | DESCRIPCION                                          | FECHA    | EMITIDO PARA REVISION                                 | DESCRIPCION | DEBILLO                                                        | PREPARO  | APROBADO                        | AUTORIZO |
|                                                                                                                                                                                                                           | A    |                                                      | 04.07.23 |                                                       |             | S-BLANCO                                                       | S-BLANCO | N. MORI                         | N. MORI  |
|                                                                                                                                                                                                                           |      |                                                      |          |                                                       |             |                                                                |          |                                 |          |
|                                                                                                                                                                                                                           |      |                                                      |          |                                                       |             |                                                                |          |                                 |          |
| ESTE PLANO Y LA INFORMACION CONTENIDA SON PROPIEDAD DEL CLIENTE. SU USO SIN PERMISO POR PARTE DEL CLIENTE, O CUALQUIER MODIFICACION DE LOS DATOS CONTENIDOS EN ESTE PLANO, SERA LA RESPONSABILIDAD POR PARTE DEL CLIENTE. |      | PLANO DE LOCALIZACIÓN DEL PROYECTO<br>ESCALA 1:10000 |          | CONSULTOR:<br>Ing. Nilsson Mori Sánchez<br>CIP 175217 |             | TITULO:<br>PLANO DE PERFILES SISMICOS<br>ESTUDIOS DE GEOFISICA |          | ESCALA: GRAFICA PLANO N°: LS-57 |          |
|                                                                                                                                                                                                                           |      |                                                      |          |                                                       |             |                                                                |          |                                 |          |

| CUADRO DE COORDENADAS |           |            |           |            |        |        |           |            |           |
|-----------------------|-----------|------------|-----------|------------|--------|--------|-----------|------------|-----------|
| Código                | Inicio    | Este       | Norte     | Fin        | Código | Inicio | Este      | Norte      | Fin       |
| LS-01                 | 176486.00 | 9289459.00 | 176469.25 | 9289506.11 | 50     | LS-21  | 176548.00 | 9289661.00 | 176529.83 |
| LS-02                 | 176486.00 | 9289532.00 | 176497.63 | 9289590.63 | 50     | LS-22  | 176558.00 | 9289685.00 | 176576.43 |
| LS-03                 | 176490.00 | 9289506.00 | 176491.08 | 9289705.99 | 100    | LS-23  | 176568.00 | 9289685.00 | 176551.15 |
| LS-04                 | 176496.00 | 9289596.00 | 176495.48 | 9289787.42 | 100    | LS-24  | 176568.00 | 9289686.00 | 176581.56 |
| LS-05                 | 176488.00 | 9289760.00 | 176508.23 | 9289662.07 | 100    | LS-25  | 176575.00 | 9289635.00 | 176581.56 |
| LS-06                 | 176504.00 | 9289556.00 | 176510.20 | 9289606.39 | 50     | LS-26  | 176575.00 | 9289635.00 | 176562.01 |
| LS-07                 | 176504.00 | 9289587.00 | 176495.24 | 9289637.46 | 50     | LS-27  | 176564.00 | 9289611.00 | 176541.44 |
| LS-08                 | 176486.00 | 9289531.00 | 176535.99 | 9289534.02 | 50     | LS-28  | 176536.00 | 9289502.00 | 176572.96 |
| LS-09                 | 176491.00 | 9289547.00 | 176540.68 | 9289541.36 | 50     | LS-29  | 176542.00 | 9289503.00 | 176587.25 |
| LS-10                 | 176494.00 | 9289565.00 | 176541.74 | 9289550.15 | 50     | LS-30  | 176542.00 | 9289597.00 | 176580.89 |
| LS-11                 | 176495.00 | 9289580.00 | 176544.69 | 9289574.48 | 50     | LS-31  | 176515.00 | 9289861.00 | 176571.53 |
| LS-12                 | 176521.00 | 9289591.00 | 176570.03 | 9289581.19 | 50     | LS-32  | 176535.00 | 9289865.00 | 176596.83 |
| LS-13                 | 176498.00 | 9289502.00 | 176547.96 | 9289604.04 | 50     | LS-33  | 176566.00 | 9289875.00 | 176595.99 |
| LS-14                 | 176489.00 | 9289521.00 | 176538.89 | 9289617.75 | 50     | LS-34  | 176575.00 | 9289881.00 | 176597.65 |
| LS-15                 | 176490.00 | 9289538.00 | 176539.29 | 9289629.61 | 50     | LS-35  | 176510.00 | 9289955.00 | 176589.96 |
| LS-16                 | 176490.00 | 9289553.00 | 176541.75 | 9289648.03 | 50     | LS-36  | 176510.00 | 9289955.00 | 176546.40 |
| LS-17                 | 176497.00 | 9289569.00 | 176546.37 | 9289661.10 | 50     | LS-37  | 176537.00 | 9289452.00 | 176584.51 |
| LS-18                 | 176495.00 | 9289585.00 | 176544.92 | 9289682.33 | 50     | LS-38  | 176551.00 | 9289485.00 | 176524.20 |
| LS-19                 | 176497.00 | 9289593.00 | 176546.81 | 9289697.33 | 50     | LS-39  | 176527.00 | 9289503.00 | 176588.16 |
| LS-20                 | 176512.00 | 9289705.00 | 176530.40 | 9289751.49 | 50     | LS-40  | 176577.00 | 9289738.00 | 176591.62 |

| CUADRO DE COORDENADAS |           |            |           |            |        |        |           |            |           |
|-----------------------|-----------|------------|-----------|------------|--------|--------|-----------|------------|-----------|
| Código                | Inicio    | Este       | Norte     | Fin        | Código | Inicio | Este      | Norte      | Fin       |
| LS-41                 | 176468.00 | 9289761.00 | 176514.00 | 9289851.00 | 100    | LS-41  | 176468.00 | 9289761.00 | 176514.00 |
| LS-42                 | 176505.00 | 9289752.00 | 176518.00 | 9289847.00 | 100    | LS-42  | 176505.00 | 9289752.00 | 176518.00 |
| LS-43                 | 176518.00 | 9289756.00 | 176527.00 | 9289847.00 | 100    | LS-43  | 176518.00 | 9289756.00 | 176527.00 |
| LS-44                 | 176504.00 | 9289749.00 | 176529.00 | 9289835.00 | 100    | LS-44  | 176504.00 | 9289749.00 | 176529.00 |
| LS-45                 | 176516.00 | 9289754.00 | 176513.00 | 9289845.00 | 100    | LS-45  | 176516.00 | 9289754.00 | 176513.00 |
| LS-46                 | 176552.00 | 9289829.00 | 176594.46 | 9289945.00 | 100    | LS-46  | 176552.00 | 9289829.00 | 176594.46 |
| LS-47                 | 176586.00 | 9289869.00 | 176599.00 | 9289967.00 | 100    | LS-47  | 176586.00 | 9289869.00 | 176599.00 |
| LS-48                 | 176567.00 | 9289773.00 | 176594.46 | 9289870.29 | 100    | LS-48  | 176567.00 | 9289773.00 | 176594.46 |
| LS-49                 | 176550.00 | 9289769.00 | 176579.00 | 9289866.00 | 100    | LS-49  | 176550.00 | 9289769.00 | 176579.00 |
| LS-50                 | 176531.00 | 9289756.00 | 176565.00 | 9289845.00 | 100    | LS-50  | 176531.00 | 9289756.00 | 176565.00 |
| LS-51                 | 176533.00 | 9289760.00 | 176593.00 | 9289830.00 | 100    | LS-51  | 176533.00 | 9289760.00 | 176593.00 |
| LS-52                 | 176585.00 | 9289597.00 | 176542.00 | 9289858.00 | 100    | LS-52  | 176585.00 | 9289597.00 | 176542.00 |
| LS-53                 | 176519.00 | 9289586.00 | 176532.00 | 9289858.00 | 100    | LS-53  | 176519.00 | 9289586.00 | 176532.00 |
| LS-54                 | 176483.00 | 9289519.00 | 176536.00 | 9289590.00 | 100    | LS-54  | 176483.00 | 9289519.00 | 176536.00 |
| LS-55                 | 176564.00 | 9289512.00 | 176502.00 | 9289584.00 | 100    | LS-55  | 176564.00 | 9289512.00 | 176502.00 |
| LS-56                 | 176564.00 | 9289640.00 | 176501.00 | 9289559.00 | 100    | LS-56  | 176564.00 | 9289640.00 | 176501.00 |
| LS-57                 | 176493.00 | 9289472.00 | 176506.00 | 9289572.00 | 100    | LS-57  | 176493.00 | 9289472.00 | 176506.00 |
| LS-58                 | 176468.00 | 9289490.00 | 176545.00 | 9289594.00 | 100    | LS-58  | 176468.00 | 9289490.00 | 176545.00 |
| LS-59                 | 176531.00 | 9289490.00 | 176545.00 | 9289594.00 | 100    | LS-59  | 176531.00 | 9289490.00 | 176545.00 |
